# Supplementary material
Source: PubMed Central journal article supplement (PMC3296892)
Supplement: NIHMS345593-supplement-1.pdf [file NIHMS345593-supplement-1.pdf]

# Supplementary Information

A Quantitative Basis for Antiretroviral Therapy for HIV-1 Infection

Benjamin L. Jilek<sup>1</sup>, Melissa Zarr<sup>2</sup>, Maame E. Sampah<sup>1</sup>, S. Alireza Rabi<sup>1</sup>, Cynthia K. Bullen<sup>1</sup>,  
Jun Lai<sup>1</sup>, Lin Shen<sup>1,2</sup> and Robert F. Siliciano<sup>1,2,3</sup>

Departments of Medicine<sup>1</sup> and Pharmacology and Molecular Sciences<sup>2</sup>, Johns Hopkins  
University School of Medicine, and Howard Hughes Medical Institute<sup>3</sup>, Baltimore MD

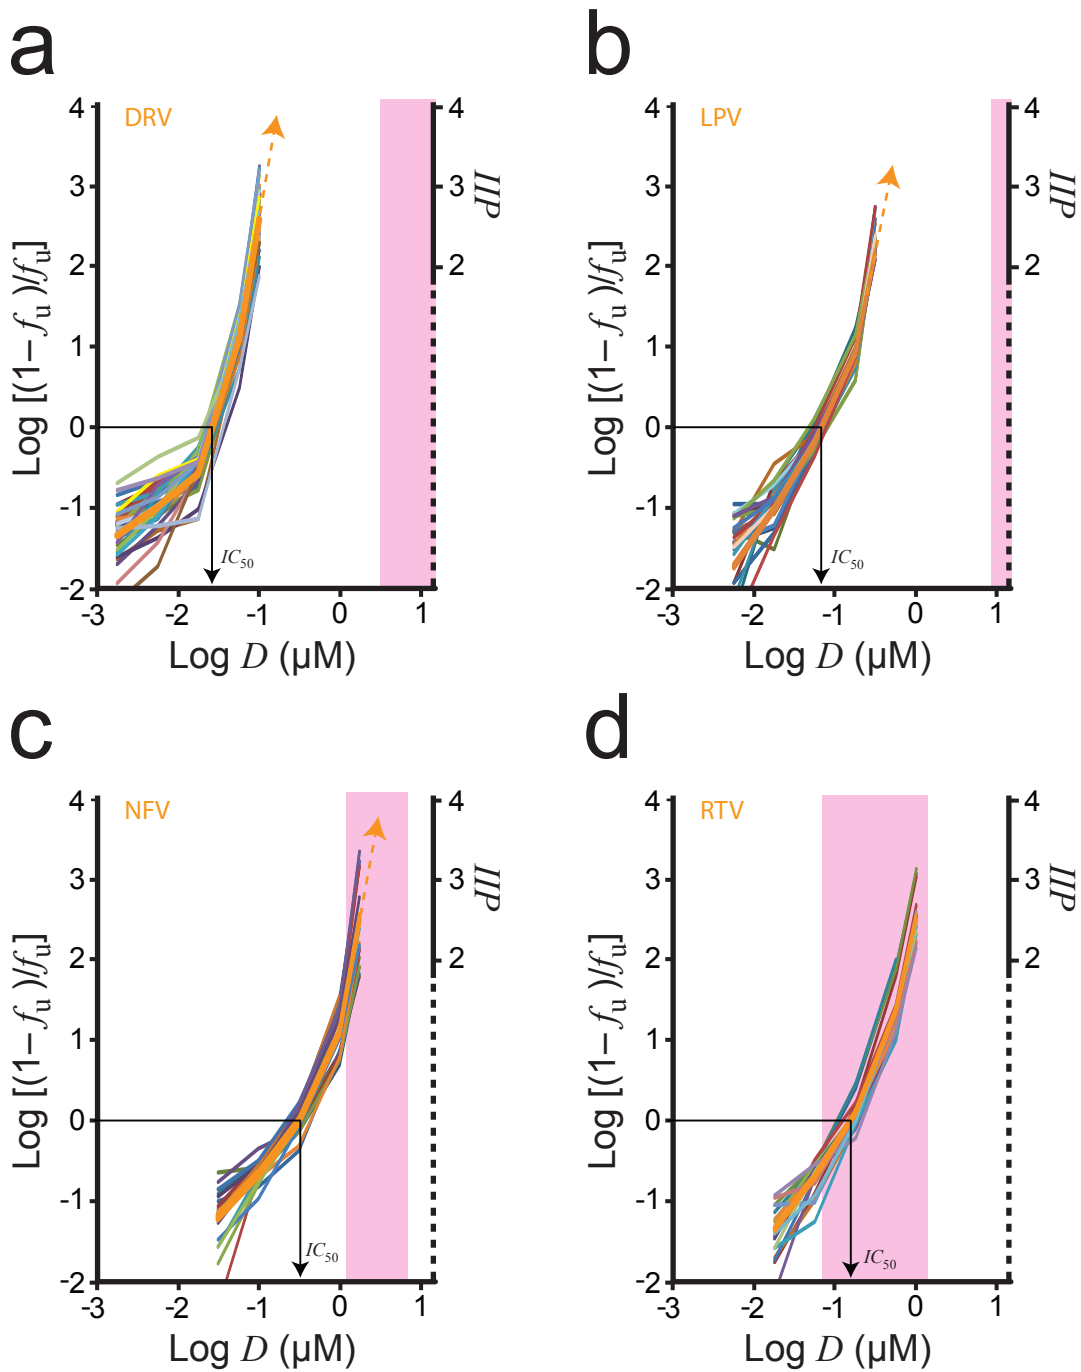

**Figure S1.** Dose-response curves for the PIs DRV (a), LPV (b), NFV (c), and RTV (d) in primary CD4<sup>+</sup> T cells. Thin colored lines represent curves obtained in CD4<sup>+</sup> T cells from different donors. The thick orange line is the mean curve. The pink shaded region represents the actual clinical concentration range for the relevant drugs.

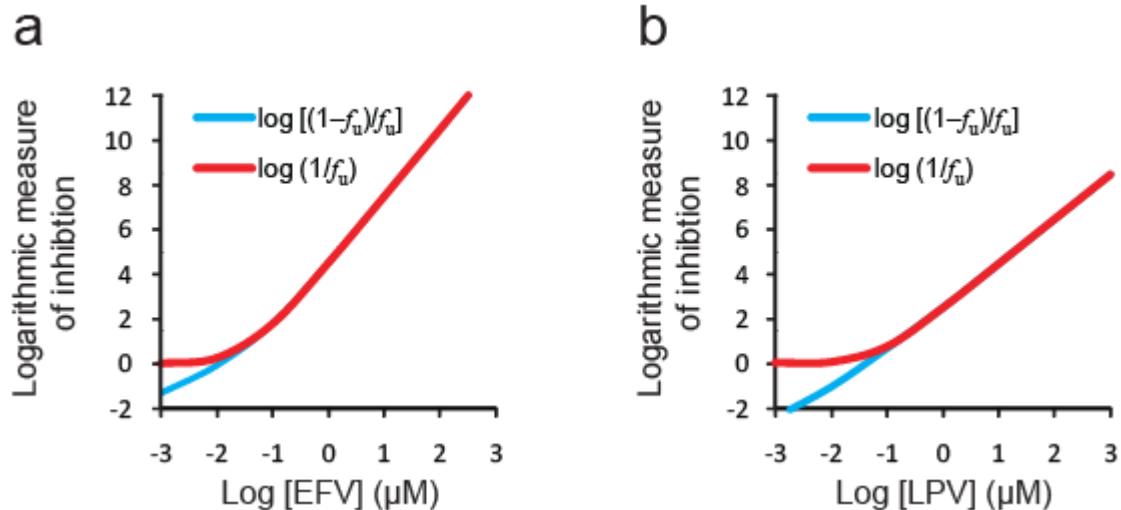

**Figure S2.** Extrapolation of median effect plots. **(A)** Plots of logarithmic measures of inhibition based on the critical subset model with parameters chosen to fit the dose response curve of the NNRTI efavirenz (see L. Shen et al, *Sci. Trans. Med.* 3, 91ra63, 2011). Specifically, in this example,  $n_T = 4 \pm 1$ ,  $c = 3$ , and  $K_d = 0.018 \mu\text{M}$ . Note that even at extremely high levels of inhibition, these plots do not inflect downward. **(B)** Plots of logarithmic measures of inhibition based on the critical subset model with parameters chosen to fit the lower portion of dose response curve for the PI lopinavir (see L. Shen et al, *Sci. Trans. Med.* 3, 91ra63, 2011). Specifically, in this example,  $n_T = 12 \pm 5$ ,  $c = 2$  and  $K_d = 0.0068 \mu\text{M}$ . Note that even at extremely high levels of inhibition, these plots do not inflect downward. In fact, experimental PI dose response curves inflect upward due to the combined effects of protease inhibition on multiple downstream steps in the virus life cycle.

|     | AZT                     | d4T                     | 3TC                     | FTC                     | ddI                     | TDF                     | ABC                     | NVP                            | ETR                     | EFV                     | RAL                     | ELV                     | RTV                            | ATV                     | DRV                            | LPV                            | NFV                            | ENF                     | MVC                     |
|-----|-------------------------|-------------------------|-------------------------|-------------------------|-------------------------|-------------------------|-------------------------|--------------------------------|-------------------------|-------------------------|-------------------------|-------------------------|--------------------------------|-------------------------|--------------------------------|--------------------------------|--------------------------------|-------------------------|-------------------------|
| AZT |                         | 0.0008<br><b>0.9802</b> | 0.0041<br>0.0000        | 0.0000<br>0.0000        | 0.0140<br>0.0029        | 0.0001<br>0.0000        | 0.0021<br>0.0004        | <b>0.0547</b><br>0.0183        | 0.0116<br>0.0061        | 0.0000<br>0.0000        | <b>0.1981</b><br>0.0000 | <b>0.3341</b><br>0.0000 | <b>0.1778</b><br>0.0095        | 0.0027<br>0.0381        | 0.0025<br>0.0066               | <b>0.1515</b><br>0.0098        | <b>0.3241</b><br>0.0450        | <b>0.2952</b><br>0.0000 | <b>0.3562</b><br>0.0001 |
| d4T | 0.0008<br><b>0.9802</b> |                         | <b>0.0513</b><br>0.0026 | 0.0045<br>0.0006        | 0.0011<br>0.0012        | 0.0017<br>0.0005        | 0.0101<br>0.0011        | 0.0418<br>0.0011               | 0.0117<br>0.0017        | 0.0008<br>0.0004        | <b>0.0949</b><br>0.0000 | <b>0.6133</b><br>0.0001 | <b>0.0920</b><br>0.0049        | 0.0077<br><b>0.0542</b> | <b>0.6706</b><br>0.0444        | 0.0019<br>0.0094               | <b>0.1820</b><br>0.0217        | <b>0.2954</b><br>0.0000 | <b>0.5409</b><br>0.0037 |
| 3TC | 0.0041<br>0.0000        | <b>0.0513</b><br>0.0026 |                         | 0.0140<br><b>0.4799</b> | 0.0015<br><b>0.0945</b> | <b>0.1327</b><br>0.0005 | 0.0014<br>0.0133        | 0.0103<br>0.0020               | 0.0194<br>0.0183        | 0.0000<br>0.0000        | <b>0.9681</b><br>0.0000 | 0.0345<br>0.0000        | 0.0014<br>0.0156               | 0.0000<br>0.0000        | <b>0.0944</b><br>0.0192        | 0.0495<br>0.0245               | <b>0.0978</b><br>0.0173        | <b>0.5965</b><br>0.0000 | 0.0372<br>0.0025        |
| FTC | 0.0000<br>0.0000        | 0.0045<br>0.0006        | 0.0140<br><b>0.4799</b> |                         | 0.0211<br><b>0.0800</b> | 0.0051<br><b>0.0681</b> | 0.0099<br><b>0.7581</b> | 0.0146<br>0.0029               | 0.0104<br>0.0076        | 0.0040<br>0.0000        | <b>0.8500</b><br>0.0066 | <b>0.7611</b><br>0.0008 | 0.0079<br>0.0008               | 0.0000<br>0.0000        | 0.0004<br>0.0003               | 0.0001<br>0.0000               | <b>0.1667</b><br>0.0078        | 0.0142<br>0.0003        | <b>0.1747</b><br>0.0029 |
| ddI | 0.0140<br>0.0029        | 0.0011<br>0.0012        | 0.0015<br><b>0.0945</b> | 0.0211<br><b>0.0800</b> |                         | 0.0016<br><b>0.4263</b> | 0.0017<br>0.0038        | <b>0.1683</b><br>0.0001        | 0.0047<br><b>0.2775</b> | 0.0001<br>0.0000        | <b>0.5521</b><br>0.0048 | <b>0.4496</b><br>0.0021 | 0.0075<br><b>0.0539</b>        | <b>0.0753</b><br>0.0043 | 0.0002<br>0.0000               | <b>0.0595</b><br>0.0065        | 0.0109<br>0.0036               | <b>0.0546</b><br>0.0001 | <b>0.1348</b><br>0.0017 |
| TDF | 0.0001<br>0.0000        | 0.0017<br>0.0005        | <b>0.1327</b><br>0.0005 | 0.0051<br><b>0.0681</b> | 0.0016<br><b>0.4263</b> |                         | 0.0022<br><b>0.9874</b> | <b>0.9329</b><br>0.0217        | 0.0068<br><b>0.0668</b> | <b>0.0854</b><br>0.0008 | <b>0.4843</b><br>0.0052 | <b>0.5159</b><br>0.0005 | 0.0096<br>0.0096               | 0.0000<br>0.0000        | 0.0000<br>0.0012               | 0.0004<br>0.0000               | 0.0256<br>0.0279               | 0.0236<br>0.0005        | 0.0034<br>0.0002        |
| ABC | 0.0021<br>0.0004        | 0.0101<br>0.0011        | 0.0014<br>0.0133        | 0.0099<br><b>0.7581</b> | 0.0017<br>0.0038        | 0.0022<br><b>0.9874</b> |                         | 0.0274<br>0.0003               | 0.0100<br>0.0376        | <b>0.2376</b><br>0.0068 | <b>0.1376</b><br>0.0001 | <b>0.8620</b><br>0.0008 | 0.0053<br>0.0324               | 0.0098<br>0.0025        | 0.0015<br>0.0015               | 0.0223<br>0.0223               | 0.0056<br>0.0056               | 0.0001<br>0.0001        | 0.0140<br>0.0001        |
| NVP | <b>0.0547</b><br>0.0183 | 0.0418<br>0.0011        | 0.0103<br>0.0020        | 0.0146<br>0.0029        | <b>0.1683</b><br>0.0001 | <b>0.9329</b><br>0.0217 | 0.0274<br>0.0003        |                                | 0.0017<br>0.0190        | 0.0305<br><b>0.6342</b> | <b>0.4601</b><br>0.0017 | <b>0.1182</b><br>0.0223 | <b>0.0846</b><br><b>0.0718</b> | 0.0200<br>0.0001        | 0.0034<br>0.0043               | <b>0.3090</b><br>0.0028        | <b>0.4324</b><br>0.0006        | <b>0.1394</b><br>0.0011 | 0.0196<br>0.0057        |
| ETR | 0.0116<br>0.0061        | 0.0117<br>0.0017        | 0.0194<br>0.0183        | 0.0104<br>0.0076        | 0.0047<br><b>0.2775</b> | 0.0068<br><b>0.0668</b> | 0.0100<br>0.0376        | 0.0017<br>0.0190               |                         | 0.0499<br><b>0.3854</b> | <b>0.0672</b><br>0.0000 | <b>0.1922</b><br>0.0044 | <b>0.0883</b><br>0.0474        | <b>0.1507</b><br>0.0039 | <b>0.6379</b><br>0.0006        | <b>0.2210</b><br>0.0064        | 0.0111<br>0.0064               | <b>0.4843</b><br>0.0039 | 0.0419<br>0.0051        |
| EFV | 0.0000<br>0.0000        | 0.0008<br>0.0004        | 0.0000<br>0.0000        | 0.0040<br>0.0000        | 0.0001<br>0.0000        | <b>0.0854</b><br>0.0008 | <b>0.2376</b><br>0.0068 | 0.0305<br><b>0.6342</b>        | 0.0499<br><b>0.3854</b> |                         | <b>0.2924</b><br>0.0061 | <b>0.6194</b><br>0.0013 | <b>0.1041</b><br>0.0001        | <b>0.1970</b><br>0.0105 | <b>0.0590</b><br>0.0016        | <b>0.3444</b><br>0.0000        | <b>0.1484</b><br>0.0039        | <b>0.1559</b><br>0.0000 | 0.0035<br>0.0105        |
| RAL | <b>0.1981</b><br>0.0000 | <b>0.0949</b><br>0.0000 | <b>0.9681</b><br>0.0000 | <b>0.8500</b><br>0.0066 | <b>0.5521</b><br>0.0048 | <b>0.4843</b><br>0.0052 | <b>0.1376</b><br>0.0001 | <b>0.4601</b><br>0.0017        | <b>0.0672</b><br>0.0000 | <b>0.2924</b><br>0.0061 |                         | 0.0078<br><b>0.7004</b> | <b>0.7567</b><br>0.0034        | <b>0.1012</b><br>0.0000 | <b>0.5038</b><br>0.0008        | 0.0121<br>0.0001               | 0.0137<br>0.0002               | <b>0.1368</b><br>0.0006 | 0.0371<br>0.0075        |
| ELV | <b>0.3341</b><br>0.0000 | <b>0.6133</b><br>0.0001 | 0.0345<br>0.0000        | <b>0.7611</b><br>0.0008 | <b>0.4496</b><br>0.0021 | <b>0.5159</b><br>0.0005 | <b>0.8620</b><br>0.0008 | <b>0.1182</b><br>0.0223        | <b>0.1922</b><br>0.0044 | <b>0.6194</b><br>0.0013 | 0.0078<br><b>0.7004</b> |                         | <b>0.1939</b><br>0.0000        | <b>0.0897</b><br>0.0001 | <b>0.9202</b><br>0.0001        | 0.0319<br>0.0001               | <b>0.0659</b><br>0.0038        | <b>0.7744</b><br>0.0116 | <b>0.9409</b><br>0.0219 |
| RTV | <b>0.1778</b><br>0.0095 | <b>0.0920</b><br>0.0049 | 0.0014<br>0.0156        | 0.0079<br>0.0008        | 0.0075<br><b>0.0539</b> | 0.0096<br>0.0096        | 0.0053<br>0.0324        | <b>0.0846</b><br><b>0.0718</b> | <b>0.0883</b><br>0.0474 | <b>0.1041</b><br>0.0001 | <b>0.7567</b><br>0.0034 | <b>0.1939</b><br>0.0000 |                                | 0.0132<br>0.0062        | <b>0.9944</b><br>0.0050        | 0.0018<br>0.0030               | 0.0028<br><b>0.1053</b>        | 0.0160<br><b>0.2053</b> |                         |
| ATV | 0.0027<br>0.0381        | 0.0077<br><b>0.0542</b> | 0.0000<br>0.0000        | 0.0000<br>0.0000        | <b>0.0753</b><br>0.0043 | 0.0000<br>0.0000        | 0.0098<br>0.0025        | 0.0200<br>0.0001               | <b>0.1507</b><br>0.0039 | <b>0.1970</b><br>0.0105 | <b>0.1012</b><br>0.0002 | <b>0.0897</b><br>0.0001 | 0.0132<br>0.0062               |                         | 0.0470<br><b>0.2613</b>        | 0.0004<br>0.0100               | 0.0207<br>0.0296               | 0.0494<br>0.0016        |                         |
| DRV | 0.0025<br>0.0066        | <b>0.6706</b><br>0.0444 | <b>0.0944</b><br>0.0192 | 0.0004<br>0.0003        | 0.0002<br>0.0000        | 0.0000<br>0.0012        | <b>0.1277</b><br>0.0015 | 0.0034<br>0.0043               | <b>0.6379</b><br>0.0006 | <b>0.0590</b><br>0.0016 | <b>0.5038</b><br>0.0008 | <b>0.9202</b><br>0.0001 | <b>0.9944</b><br>0.0050        | 0.0470<br><b>0.2613</b> |                                | <b>0.0522</b><br><b>0.1461</b> | <b>0.4917</b><br><b>0.0568</b> | 0.0149<br><b>0.8353</b> |                         |
| LPV | <b>0.1515</b><br>0.0098 | 0.0019<br>0.0094        | 0.0495<br>0.0245        | 0.0001<br>0.0000        | <b>0.0595</b><br>0.0065 | 0.0004<br>0.0000        | <b>0.0644</b><br>0.0223 | <b>0.3090</b><br>0.0028        | <b>0.2210</b><br>0.0064 | <b>0.3444</b><br>0.0000 | 0.0121<br>0.0001        | 0.0319<br>0.0001        | 0.0018<br>0.0030               | 0.0004<br>0.0100        | <b>0.0522</b><br><b>0.1461</b> |                                | 0.0172<br><b>0.1256</b>        | 0.0105<br><b>0.1256</b> |                         |
| NFV | <b>0.3241</b><br>0.0450 | <b>0.1820</b><br>0.0217 | <b>0.0978</b><br>0.0173 | <b>0.1667</b><br>0.0078 | 0.0109<br>0.0036        | 0.0256<br>0.0279        | <b>0.2907</b><br>0.0056 | <b>0.4324</b><br>0.0006        | <b>0.0111</b><br>0.0064 | <b>0.1484</b><br>0.0039 | <b>0.0137</b><br>0.0002 | <b>0.0659</b><br>0.0038 | 0.0028<br><b>0.1053</b>        | 0.0207<br>0.0296        | <b>0.4917</b><br><b>0.0568</b> | 0.0172<br><b>0.1256</b>        |                                | <b>0.3974</b><br>0.0002 |                         |
| ENF | <b>0.2952</b><br>0.0000 | <b>0.2954</b><br>0.0000 | <b>0.5965</b><br>0.0000 | 0.0142<br>0.0003        | <b>0.0546</b><br>0.0001 | 0.0236<br>0.0005        | <b>0.0507</b><br>0.0001 | <b>0.1394</b><br>0.0011        | <b>0.4843</b><br>0.0039 | <b>0.1559</b><br>0.0000 | <b>0.1368</b><br>0.0006 | <b>0.7744</b><br>0.0116 | 0.0160<br><b>0.2053</b>        | 0.0494<br>0.0016        | 0.0149<br><b>0.8353</b>        | 0.0105<br>0.0039               | 0.0002<br>0.0002               |                         | <b>0.0590</b><br>0.0010 |
| MVC | <b>0.3562</b><br>0.0001 | <b>0.5409</b><br>0.0037 | 0.0372<br>0.0025        | <b>0.1747</b><br>0.0029 | <b>0.1348</b><br>0.0017 | 0.0034<br>0.0002        | 0.0140<br>0.0001        | 0.0196<br>0.0057               | 0.0419<br>0.0051        | 0.0035<br>0.0105        | 0.0371<br>0.0075        | <b>0.9409</b><br>0.0219 |                                |                         |                                |                                |                                | <b>0.0590</b><br>0.0010 |                         |

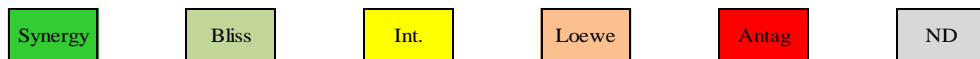

**Figure S3.** *P* values for differences between experimentally observed inhibition by combinations of two drugs and predictions of the Bliss (top) and Loewe (bottom) models. Comparisons are based on a paired analysis transformed inhibition values,  $\log [(1-f_u)/f_u]$ , for individual donors at concentrations giving the best separation between the predictions of the two models. *P* values >0.05 are in **bold**. Combinations giving inhibition consistent with a single model are indicated in light green (Bliss) or orange (Loewe). Combinations for which the experimental inhibition was significantly greater than the predictions of either model are indicated in bright green (synergy). Intermediate inhibition consistent with neither or both models is indicated in yellow. Antagonism, defined as inhibition significantly below the predictions of both models, was not observed in this analysis. As described above, MVC-PI combinations could not be done (ND).

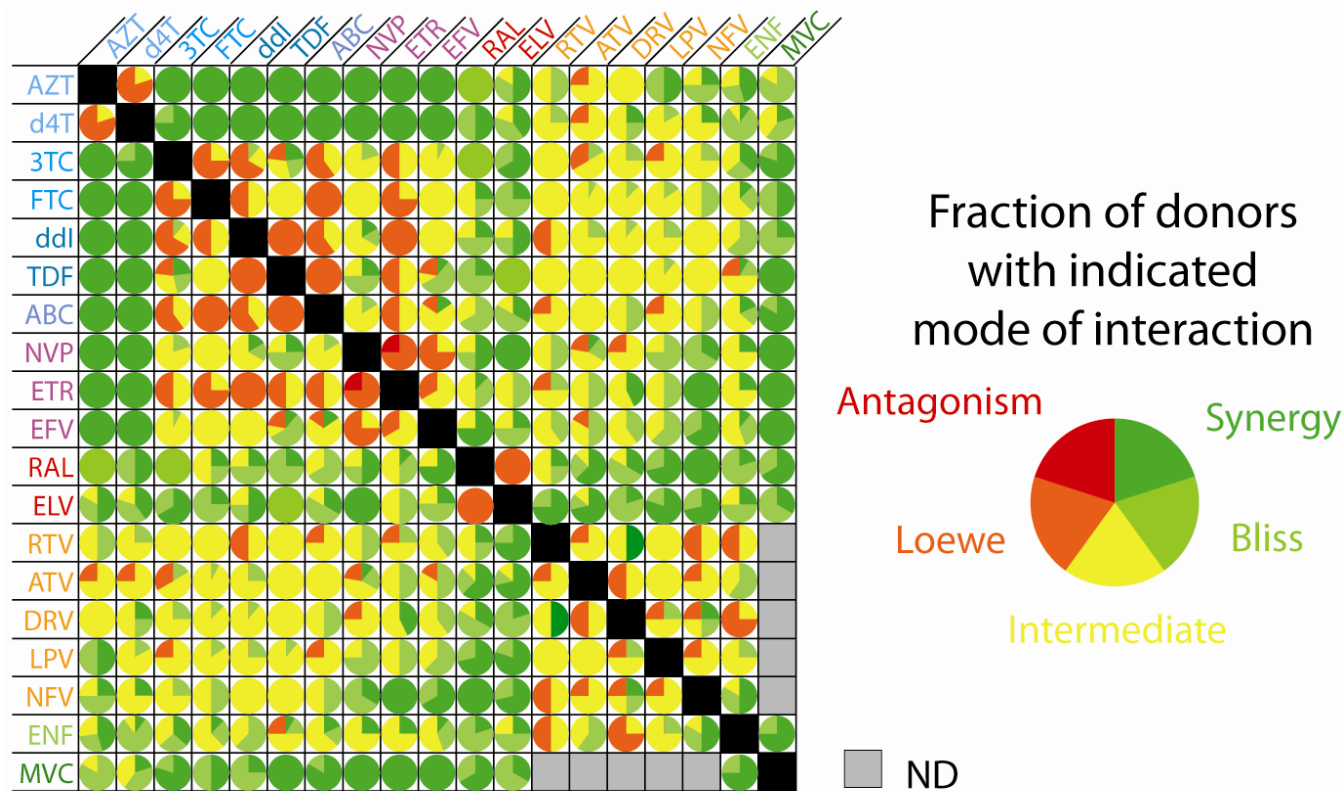

**Figure S4.** Individual variation in combination effects for pairs of antiretroviral drugs. For each combination, combined effects were examined in cells from 4-12 different donors and characterized as fitting the Loewe or Bliss models, showing synergy or antagonism, or an intermediate pattern as described in **Fig. 2f**. For each combination, a pie chart reflects the fraction of individuals showing each mode of interaction. For a statistical analysis of this individual variation, see **Supplementary Fig. S3**. Because of the lower levels of infection achieved with R5-tropic pseudoviruses, PI-MVC combinations could not be analyzed.

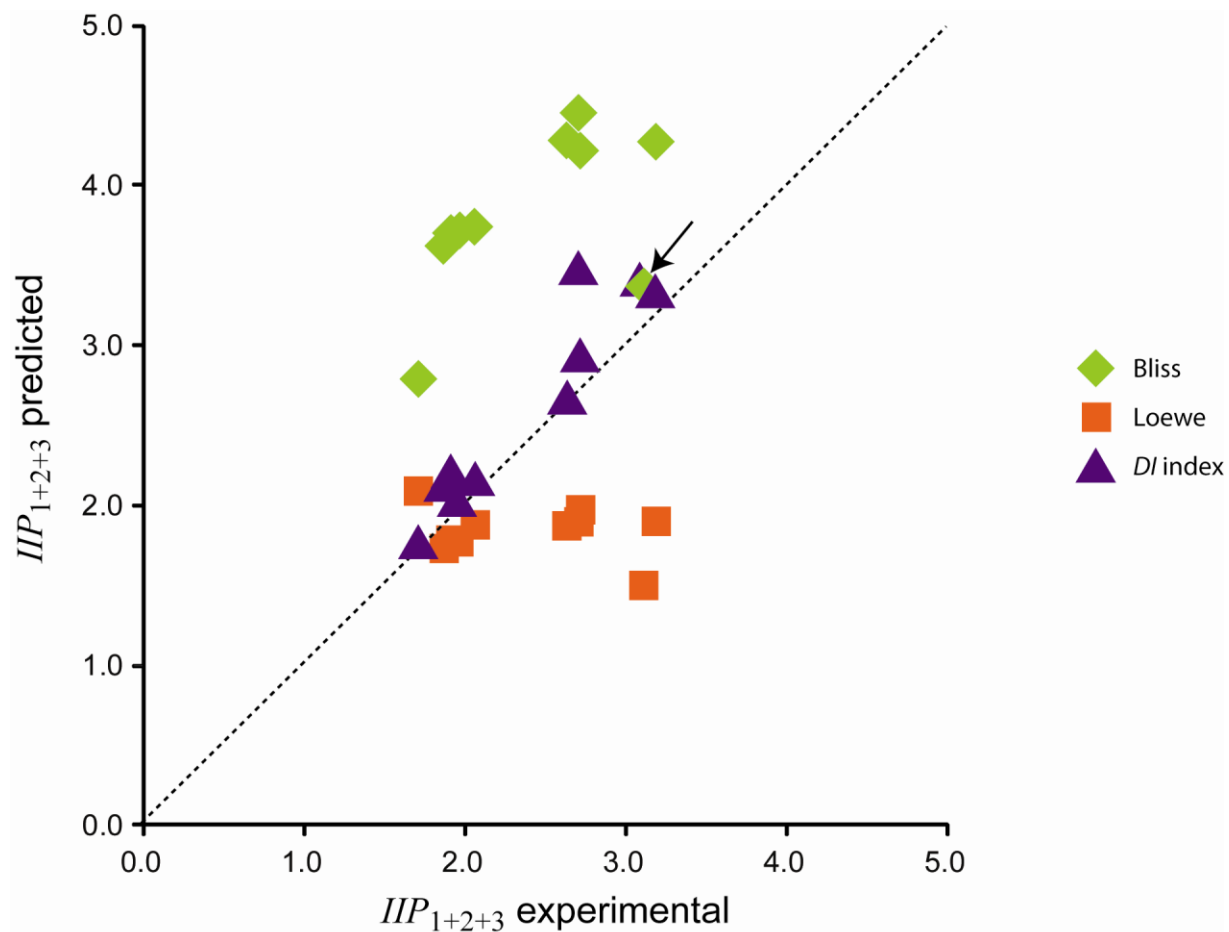

**Figure S5.** Relationship between predicted and experimental values of  $IIP_{1+2+3}$  for three different prediction methods. Ten selected three drug combinations were tested at concentrations chosen to maximize the difference between the Loewe and Bliss predictions while remaining within the dynamic range of the assay. Experimental three drug inhibition was compared to three drug predictions of the Loewe and Bliss models made using the equations in **Fig. 3** and to a 3 drug prediction based on a weighted average of the pairwise  $DI$  index values determined from two drug trials within each experiment. The dotted line represents a perfect correlation between predicted and experimental values. The  $DI$  index method consistently predicted experimentally results more accurately than either of the standard models. Note that the Bliss model consistently overestimates the combined effect except for one regimen (NVP/ENF/RAL, arrow) specifically chosen because all of the pairwise 2 drug interactions followed this model (**Fig. 2f**).

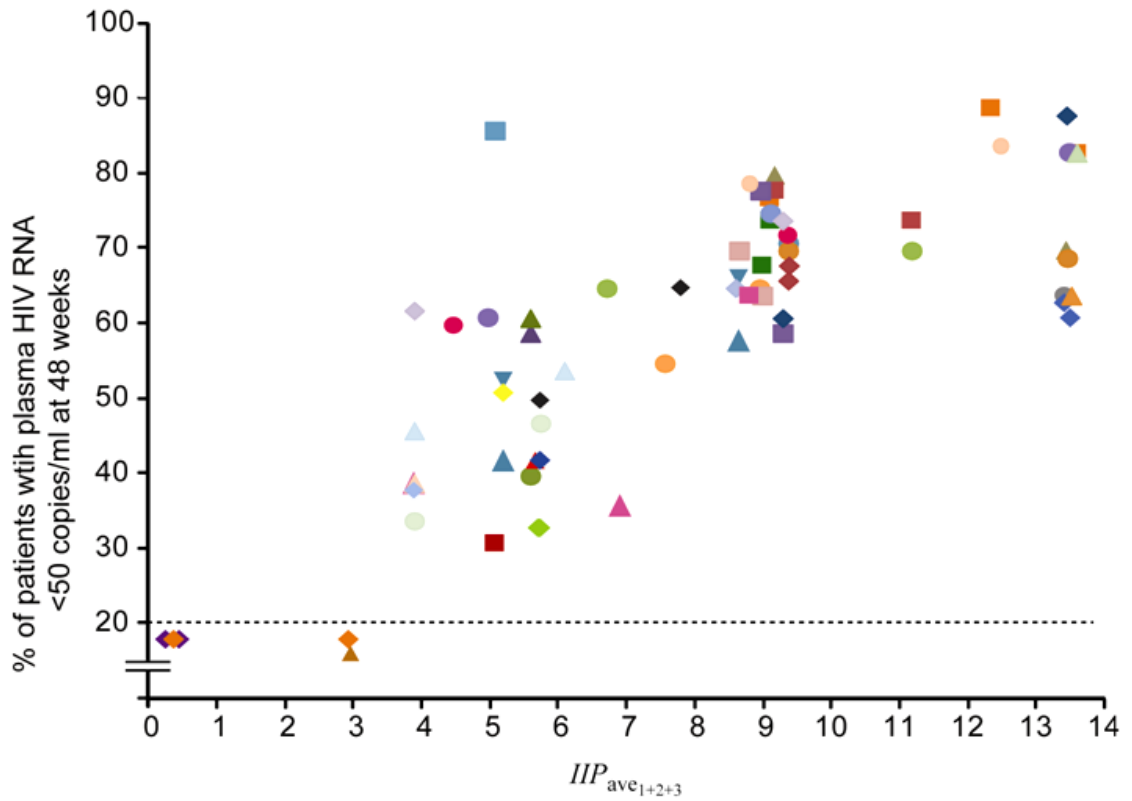

- |                     |              |              |
|---------------------|--------------|--------------|
| ▲ Gilead 934        | ● Scan       | ◆ ACTG 298   |
| ▲ Merck 035         | ● Dupont 006 | ● CNAAB 3005 |
| ▲ CNA 3014          | ● ESS 30009  | ● CNA 30024  |
| ◆ EFV 30021         | ◆ CNA 30021  | ■ ACTG 1542  |
| ◆ MERIT             | ■ STARTMRK   | ▲ DuPont 006 |
| ■ Gilead 903        | ● CLASS      | ● 2NN        |
| ■ Gilead FTC 301A   | ● ACTG 5095  | ▲ BMS 034    |
| ▲ BMS AI 424424-007 | ■ CASTLE     | ● BMS 089    |
| ● ALERT             | ■ CNA 3005   | ■ AB M02-418 |
| ▼ AB M98-863        | ◆ KLEAN      | ● ARTEMIS    |
| ▲ ACTG 5142         | ■ GEMINI     | ◆ INITIO     |
| ▲ SOLO              | ◆ NEAT       | ◆ BMS 008    |
| ◆ Agouron 542       | ▲ BMS 007    | ◆ AL 454-152 |
| ▲ Atlantic          | ● AI 454-148 | ◆ ACTG 384   |
| ◆ NAHWP             | ◆ Combine    |              |

**Figure S6.** Relationship between clinical outcome and  $IIP_{ave_{1+2+3}}$  values. Clinical outcome is based on results of published comparative clinical trials of regimens comprised of 19 commonly used antiretroviral drugs, for which sufficient pharmacokinetic and pharmacodynamic data were available to calculate  $IIP_{ave_{1+2+3}}$  using the *DI* index method. The % of patients in each arm plasma HIV-1 RNA levels below 50 copies/ml at 48 weeks in an intent-to-treat analysis is plotted against the estimated  $IIP_{ave_{1+2+3}}$  of the regimen. Early regimens for which virologic suppression was not achieved are indicated as < 20%. For statistical analysis, results from each arm are considered independently. Clinical trial results are compiled in *Medical Management of HIV Infection*, J.D. Bartlett, J. E. Gallant, and P.A. Pham, editors, Knowledge Source Solutions, Durham NC, 2009. This source contains original references for trial results.



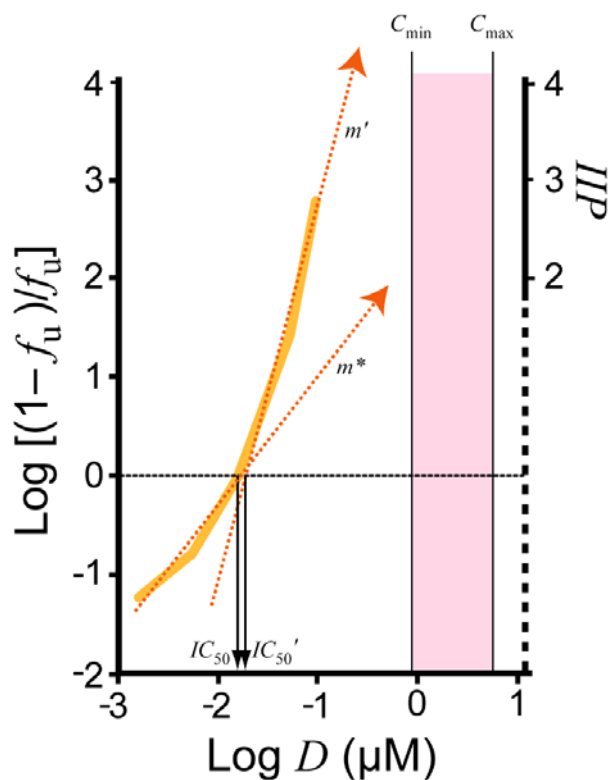

**Figure S7.** Defining  $m'$  and  $IC_{50}'$ . For dose-response curves that inflect upward at drug concentrations below the clinical concentration range ( $C_{\min} < D < C_{\max}$ , pink shaded area), the behavior of the dose-response curve in the clinical concentration range was estimated using the median-effect model (dotted orange line, Equation 2), with parameters  $m'$  and  $IC_{50}'$  chosen using region of the measured dose-response curve closest to the clinical concentration range as described in Supplementary Information, Methods.  $m^*$  is the slope of a best fit line through the data points for which  $\log [(1-f_u)/f_u] < 0$ . When the dose-response curves inflect,  $IC_{50}'$  is expected to differ from  $IC_{50}$ . For curves that inflect upward,  $m' > m^*$ .

**Supplementary Table S1.** Mean  $IC_{50}$  and  $m$  values for antiretroviral drugs.

| Drug | Class | $IC_{50}$<br>( $\mu\text{M}$ ) <sup>a</sup> | $\log IC_{50}$<br>$\pm$ SD <sup>a</sup> | $IC_{50}'$<br>( $\mu\text{M}$ ) <sup>b</sup> | $\log IC_{50}'$<br>$\pm$ SD <sup>b</sup> | $m \pm$ SD <sup>c</sup> | $m' \pm$ SD <sup>d</sup> | $m^* \pm$ SD <sup>e</sup> | $P$ for $m'$ vs. $m^*$    | $n^f$ |
|------|-------|---------------------------------------------|-----------------------------------------|----------------------------------------------|------------------------------------------|-------------------------|--------------------------|---------------------------|---------------------------|-------|
| AZT  | NRTI  | 1.7594                                      | 0.25 $\pm$ 0.62                         | 1.7447                                       | 0.24 $\pm$ 0.64                          | 0.62 $\pm$ 0.18         | 0.62 $\pm$ 0.21          | 0.60 $\pm$ 0.43           | 0.3654                    | 45    |
| d4T  | NRTI  | 1.0966                                      | 0.04 $\pm$ 0.33                         | 1.0832                                       | 0.03 $\pm$ 0.37                          | 1.25 $\pm$ 0.22         | 0.84 $\pm$ 0.20          | 0.85 $\pm$ 0.44           | 0.6760                    | 44    |
| 3TC  | NRTI  | 0.0558                                      | -1.25 $\pm$ 0.22                        | 0.0557                                       | -1.25 $\pm$ 0.23                         | 0.97 $\pm$ 0.11         | 1.13 $\pm$ 0.25          | 1.12 $\pm$ 0.27           | 0.9786                    | 49    |
| FTC  | NRTI  | 0.0112                                      | -1.95 $\pm$ 0.30                        | 0.0284                                       | -1.55 $\pm$ 0.47                         | 0.92 $\pm$ 0.12         | 1.22 $\pm$ 0.33          | 1.06 $\pm$ 0.55           | 0.0934                    | 54    |
| ABC  | NRTI  | 0.0594                                      | -1.23 $\pm$ 0.23                        | 0.0777                                       | -1.11 $\pm$ 0.65                         | 0.85 $\pm$ 0.08         | 1.05 $\pm$ 0.23          | 1.22 $\pm$ 0.23           | <b>0.0078<sup>g</sup></b> | 40    |
| ddI  | NRTI  | 0.1368                                      | -0.86 $\pm$ 0.36                        | 1.8086                                       | 0.26 $\pm$ 0.26                          | 1.12 $\pm$ 0.15         | 2.25 $\pm$ 0.88          | 1.35 $\pm$ 0.76           | <b>0.0151</b>             | 34    |
| TDF  | NRTI  | 0.0138                                      | -1.86 $\pm$ 0.95                        | 0.0130                                       | -1.89 $\pm$ 0.64                         | 0.92 $\pm$ 0.17         | 0.42 $\pm$ 0.13          | ND <sup>h</sup>           | ND <sup>h</sup>           | 46    |
| EFV  | NNRTI | 0.0058                                      | -2.24 $\pm$ 0.13                        | 0.0146                                       | -1.83 $\pm$ 0.18                         | 1.69 $\pm$ 0.23         | 2.56 $\pm$ 0.50          | 1.40 $\pm$ 0.61           | <b>&lt;0.0001</b>         | 34    |
| NVP  | NNRTI | 0.0891                                      | -1.05 $\pm$ 0.18                        | 0.2262                                       | -0.65 $\pm$ 0.22                         | 1.55 $\pm$ 0.18         | 2.36 $\pm$ 0.62          | 1.13 $\pm$ 0.62           | <b>&lt;0.0001</b>         | 28    |
| ETR  | NNRTI | 0.0055                                      | -2.26 $\pm$ 0.10                        | 0.0112                                       | -1.95 $\pm$ 0.13                         | 1.85 $\pm$ 0.17         | 2.98 $\pm$ 0.45          | 0.95 $\pm$ 0.61           | <b>&lt;0.0001</b>         | 24    |
| ATV  | PI    | 0.0163                                      | -1.79 $\pm$ 0.11                        | 0.0183                                       | -1.74 $\pm$ 0.07                         | 2.18 $\pm$ 0.25         | 3.52 $\pm$ 0.41          | 0.98 $\pm$ 0.50           | <b>&lt;0.0001</b>         | 30    |
| DRV  | PI    | 0.0264                                      | -1.58 $\pm$ 0.07                        | 0.0259                                       | -1.59 $\pm$ 0.06                         | 2.14 $\pm$ 0.27         | 4.12 $\pm$ 0.42          | 0.76 $\pm$ 0.33           | <b>&lt;0.0001</b>         | 34    |
| LPV  | PI    | 0.0684                                      | -1.16 $\pm$ 0.06                        | 0.0702                                       | -1.15 $\pm$ 0.04                         | 2.07 $\pm$ 0.24         | 3.22 $\pm$ 0.31          | 1.32 $\pm$ 0.54           | <b>&lt;0.0001</b>         | 26    |
| NFV  | PI    | 0.3056                                      | -0.51 $\pm$ 0.09                        | 0.3433                                       | -0.46 $\pm$ 0.06                         | 1.93 $\pm$ 0.36         | 3.14 $\pm$ 0.64          | 1.07 $\pm$ 0.66           | <b>&lt;0.0001</b>         | 20    |
| RTV  | PI    | 0.1531                                      | -0.82 $\pm$ 0.09                        | 0.1742                                       | -0.76 $\pm$ 0.06                         | 2.14 $\pm$ 0.26         | 3.17 $\pm$ 0.22          | 1.36 $\pm$ 0.56           | <b>&lt;0.0001</b>         | 19    |
| RAL  | InSTI | 0.0428                                      | -1.37 $\pm$ 0.26                        | 0.0418                                       | -1.38 $\pm$ 0.27                         | 0.98 $\pm$ 0.12         | 0.91 $\pm$ 0.13          | 1.00 $\pm$ 0.35           | 0.1599                    | 33    |
| EVG  | InSTI | 0.0632                                      | -1.20 $\pm$ 0.33                        | 0.0595                                       | -1.23 $\pm$ 0.31                         | 0.93 $\pm$ 0.12         | 0.87 $\pm$ 0.26          | 0.80 $\pm$ 0.51           | 0.7043                    | 35    |
| ENF  | FI    | 0.0253                                      | -1.60 $\pm$ 0.24                        | 0.0207                                       | -1.68 $\pm$ 0.33                         | 1.57 $\pm$ 0.21         | 1.64 $\pm$ 0.29          | 0.94 $\pm$ 0.34           | <b>&lt;0.0001</b>         | 23    |
| MVC  | CRA   | 0.0010                                      | -2.99 $\pm$ 0.65                        | 0.0013                                       | -2.89 $\pm$ 0.94                         | 0.61 $\pm$ 0.17         | 0.68 $\pm$ 0.18          | 0.60 $\pm$ 0.30           | 0.6198                    | 12    |

<sup>a</sup>Geometric mean  $IC_{50}$  values obtained from  $n$  individual donors/drug.  $IC_{50}$  values followed a log normal distribution. The standard deviation (SD) is given for log transformed  $IC_{50}$  values.

<sup>b</sup>Geometric mean  $IC_{50}'$  values obtained from  $n$  individual donors/drug.  $IC_{50}'$  values were determined from  $m'$  and the y-intercept of a linear regression line best representing the dose-response curve in the clinical concentration range as described in Methods.  $IC_{50}'$  values are expected to differ from actual  $IC_{50}$  values in cases where the median-effect plots are non-linear.  $IC_{50}'$  values follow a log normal distribution. SD is given for log transformed  $IC_{50}'$  values.

<sup>c</sup>Mean and SD of the slopes obtained from  $n$  individual donors/drug. For each donor, the slope was computed using linear regression analysis of median-effect plots covering the entire dynamic range of the infectivity assay.

<sup>d</sup>Mean and SD of  $m'$  values obtained from  $n$  individual donors/drug.  $m'$  is the slope of a linear regression line best representing the median-effect plot in the clinical concentration range (see Methods).

<sup>e</sup>Mean and SD of  $m^*$  values obtained from  $n$  individual donors/drug.  $m^*$  is the slope of a linear regression line through the region median-effect plot for which  $D < IC_{50}$ .

<sup>f</sup> $n$  is the number of donors analyzed for a given drug.

<sup>g</sup> $P$  values  $< 0.05$  are in bold

<sup>h</sup>The extremely shallow nature of the TDF dose response curve in and below the clinical concentrations range precluded accurate measurement of  $m^*$ .

**Supplementary Table S2.** Statistical significance of differences in  $m'$  values for different antiretroviral drugs<sup>a</sup>.

|     | AZT                   | d4T                   | 3TC                   | FTC                   | ABC                   | ddI                   | TDF                   | EFV                   | NVP                   | ETR                   | ATV                   | DRV                   | LPV                   | NFV                   | RTV                   | RAL                   | EVG                   | ENF                   | MVC                       |
|-----|-----------------------|-----------------------|-----------------------|-----------------------|-----------------------|-----------------------|-----------------------|-----------------------|-----------------------|-----------------------|-----------------------|-----------------------|-----------------------|-----------------------|-----------------------|-----------------------|-----------------------|-----------------------|---------------------------|
| AZT |                       | 2.3x10 <sup>-06</sup> | 1.1x10 <sup>-17</sup> | 2.1x10 <sup>-15</sup> | 3.5x10 <sup>-13</sup> | 2.8x10 <sup>-15</sup> | 9.2x10 <sup>-05</sup> | 9.7x10 <sup>-27</sup> | 1.5x10 <sup>-18</sup> | 2.7x10 <sup>-25</sup> | 7.8x10 <sup>-32</sup> | 1.6x10 <sup>-25</sup> | 1.3x10 <sup>-38</sup> | 1.1x10 <sup>-14</sup> | 1.0x10 <sup>-29</sup> | 9.1x10 <sup>-11</sup> | 2.3x10 <sup>-03</sup> | 5.3x10 <sup>-19</sup> | <b>0.3268<sup>b</sup></b> |
| d4T | 2.3x10 <sup>-06</sup> |                       | 1.6x10 <sup>-08</sup> | 6.2x10 <sup>-09</sup> | 5.0x10 <sup>-05</sup> | 6.9x10 <sup>-13</sup> | 7.3x10 <sup>-16</sup> | 3.1x10 <sup>-24</sup> | 1.1x10 <sup>-16</sup> | 1.4x10 <sup>-23</sup> | 5.1x10 <sup>-30</sup> | 2.3x10 <sup>-24</sup> | 4.2x10 <sup>-36</sup> | 8.3x10 <sup>-14</sup> | 1.2x10 <sup>-27</sup> | 5.0x10 <sup>-02</sup> | <b>0.7745</b>         | 1.6x10 <sup>-14</sup> | 1.4x10 <sup>-02</sup>     |
| 3TC | 1.1x10 <sup>-17</sup> | 1.6x10 <sup>-08</sup> |                       | <b>0.0541</b>         | <b>0.1052</b>         | 1.6x10 <sup>-09</sup> | 1.3x10 <sup>-26</sup> | 2.2x10 <sup>-21</sup> | 3.1x10 <sup>-14</sup> | 1.8x10 <sup>-22</sup> | 1.0x10 <sup>-29</sup> | 2.5x10 <sup>-23</sup> | 6.6x10 <sup>-36</sup> | 7.8x10 <sup>-13</sup> | 1.8x10 <sup>-28</sup> | 3.1x10 <sup>-06</sup> | 9.2x10 <sup>-04</sup> | 7.9x10 <sup>-08</sup> | 2.3x10 <sup>-07</sup>     |
| FTC | 2.1x10 <sup>-15</sup> | 6.2x10 <sup>-09</sup> | <b>0.0541</b>         |                       | 2.1x10 <sup>-03</sup> | 1.3x10 <sup>-07</sup> | 1.3x10 <sup>-20</sup> | 4.0x10 <sup>-20</sup> | 4.1x10 <sup>-13</sup> | 6.9x10 <sup>-24</sup> | 3.2x10 <sup>-33</sup> | 2.6x10 <sup>-24</sup> | 2.2x10 <sup>-38</sup> | 5.7x10 <sup>-13</sup> | 4.2x10 <sup>-33</sup> | 4.0x10 <sup>-07</sup> | 2.4x10 <sup>-05</sup> | 4.6x10 <sup>-04</sup> | 2.0x10 <sup>-09</sup>     |
| ABC | 3.5x10 <sup>-13</sup> | 5.0x10 <sup>-05</sup> | <b>0.1052</b>         | 2.1x10 <sup>-03</sup> |                       | 1.6x10 <sup>-10</sup> | 5.6x10 <sup>-21</sup> | 1.6x10 <sup>-22</sup> | 4.4x10 <sup>-15</sup> | 2.9x10 <sup>-23</sup> | 1.6x10 <sup>-30</sup> | 7.0x10 <sup>-24</sup> | 9.1x10 <sup>-37</sup> | 3.0x10 <sup>-13</sup> | 2.9x10 <sup>-29</sup> | 4.2x10 <sup>-03</sup> | 1.9x10 <sup>-02</sup> | 1.0x10 <sup>-09</sup> | 6.0x10 <sup>-06</sup>     |
| ddI | 2.8x10 <sup>-15</sup> | 6.9x10 <sup>-13</sup> | 1.6x10 <sup>-09</sup> | 1.3x10 <sup>-07</sup> | 1.6x10 <sup>-10</sup> |                       | 7.5x10 <sup>-17</sup> | 9.9x10 <sup>-04</sup> | 1.1x10 <sup>-02</sup> | 9.0x10 <sup>-09</sup> | 1.5x10 <sup>-15</sup> | 2.0x10 <sup>-17</sup> | 3.3x10 <sup>-13</sup> | 2.3x10 <sup>-07</sup> | 1.1x10 <sup>-11</sup> | 5.3x10 <sup>-12</sup> | 2.9x10 <sup>-12</sup> | 6.5x10 <sup>-04</sup> | 2.1x10 <sup>-14</sup>     |
| TDF | 9.2x10 <sup>-05</sup> | 7.3x10 <sup>-16</sup> | 1.3x10 <sup>-26</sup> | 1.3x10 <sup>-20</sup> | 5.6x10 <sup>-21</sup> | 7.5x10 <sup>-17</sup> |                       | 1.3x10 <sup>-27</sup> | 1.6x10 <sup>-19</sup> | 2.2x10 <sup>-25</sup> | 2.3x10 <sup>-31</sup> | 6.8x10 <sup>-26</sup> | 1.0x10 <sup>-37</sup> | 4.5x10 <sup>-15</sup> | 2.9x10 <sup>-28</sup> | 3.0x10 <sup>-22</sup> | 3.0x10 <sup>-06</sup> | 1.2x10 <sup>-21</sup> | 8.8x10 <sup>-04</sup>     |
| EFV | 9.7x10 <sup>-27</sup> | 3.1x10 <sup>-24</sup> | 2.2x10 <sup>-21</sup> | 4.0x10 <sup>-20</sup> | 1.6x10 <sup>-22</sup> | 9.9x10 <sup>-04</sup> | 1.3x10 <sup>-27</sup> |                       | <b>0.5890</b>         | 2.5x10 <sup>-04</sup> | 1.2x10 <sup>-12</sup> | 1.5x10 <sup>-13</sup> | 4.7x10 <sup>-10</sup> | 7.2x10 <sup>-04</sup> | 3.7x10 <sup>-08</sup> | 1.0x10 <sup>-22</sup> | 5.3x10 <sup>-23</sup> | 4.5x10 <sup>-14</sup> | 2.8x10 <sup>-24</sup>     |
| NVP | 1.5x10 <sup>-18</sup> | 1.1x10 <sup>-16</sup> | 3.1x10 <sup>-14</sup> | 4.1x10 <sup>-13</sup> | 4.4x10 <sup>-15</sup> | 1.1x10 <sup>-02</sup> | 1.6x10 <sup>-19</sup> | <b>0.5890</b>         |                       | 3.4x10 <sup>-04</sup> | 1.5x10 <sup>-10</sup> | 3.8x10 <sup>-13</sup> | 3.6x10 <sup>-08</sup> | 4.6x10 <sup>-04</sup> | 8.9x10 <sup>-07</sup> | 8.4x10 <sup>-16</sup> | 5.4x10 <sup>-17</sup> | 3.6x10 <sup>-09</sup> | 3.2x10 <sup>-18</sup>     |
| ETR | 2.7x10 <sup>-25</sup> | 1.4x10 <sup>-23</sup> | 1.8x10 <sup>-22</sup> | 6.9x10 <sup>-24</sup> | 2.9x10 <sup>-23</sup> | 9.0x10 <sup>-09</sup> | 2.2x10 <sup>-25</sup> | 2.5x10 <sup>-04</sup> | 3.4x10 <sup>-04</sup> |                       | 1.5x10 <sup>-05</sup> | 1.3x10 <sup>-08</sup> | 4.9x10 <sup>-03</sup> | <b>0.3755</b>         | <b>0.0777</b>         | 4.4x10 <sup>-22</sup> | 4.0x10 <sup>-25</sup> | 1.4x10 <sup>-19</sup> | 1.1x10 <sup>-24</sup>     |
| ATV | 7.8x10 <sup>-32</sup> | 5.1x10 <sup>-30</sup> | 1.0x10 <sup>-29</sup> | 3.2x10 <sup>-33</sup> | 1.6x10 <sup>-30</sup> | 1.5x10 <sup>-15</sup> | 2.3x10 <sup>-31</sup> | 1.2x10 <sup>-12</sup> | 1.5x10 <sup>-10</sup> | 1.5x10 <sup>-05</sup> |                       | 1.7x10 <sup>-03</sup> | 2.0x10 <sup>-02</sup> | 2.1x10 <sup>-02</sup> | 3.6x10 <sup>-04</sup> | 6.6x10 <sup>-28</sup> | 4.0x10 <sup>-31</sup> | 2.0x10 <sup>-28</sup> | 1.0x10 <sup>-29</sup>     |
| DRV | 1.6x10 <sup>-25</sup> | 2.3x10 <sup>-24</sup> | 2.5x10 <sup>-23</sup> | 2.6x10 <sup>-24</sup> | 7.0x10 <sup>-24</sup> | 2.0x10 <sup>-17</sup> | 6.8x10 <sup>-26</sup> | 1.5x10 <sup>-13</sup> | 3.8x10 <sup>-13</sup> | 1.3x10 <sup>-08</sup> | 1.7x10 <sup>-03</sup> |                       | 6.5x10 <sup>-06</sup> | 2.6x10 <sup>-05</sup> | 2.9x10 <sup>-07</sup> | 1.5x10 <sup>-23</sup> | 1.5x10 <sup>-26</sup> | 2.8x10 <sup>-22</sup> | 3.2x10 <sup>-26</sup>     |
| LPV | 1.3x10 <sup>-38</sup> | 4.2x10 <sup>-36</sup> | 6.6x10 <sup>-36</sup> | 2.2x10 <sup>-38</sup> | 9.1x10 <sup>-37</sup> | 3.3x10 <sup>-13</sup> | 1.0x10 <sup>-37</sup> | 4.7x10 <sup>-10</sup> | 3.6x10 <sup>-08</sup> | 4.9x10 <sup>-03</sup> | 2.0x10 <sup>-02</sup> | 6.5x10 <sup>-06</sup> |                       | <b>0.3148</b>         | <b>0.1285</b>         | 8.9x10 <sup>-33</sup> | 9.6x10 <sup>-31</sup> | 5.2x10 <sup>-30</sup> | 2.5x10 <sup>-29</sup>     |
| NFV | 1.1x10 <sup>-14</sup> | 8.3x10 <sup>-14</sup> | 7.8x10 <sup>-13</sup> | 5.7x10 <sup>-13</sup> | 3.0x10 <sup>-13</sup> | 2.3x10 <sup>-07</sup> | 4.5x10 <sup>-15</sup> | 7.2x10 <sup>-04</sup> | 4.6x10 <sup>-04</sup> | <b>0.3755</b>         | 2.1x10 <sup>-02</sup> | 2.6x10 <sup>-05</sup> | <b>0.3148</b>         |                       | <b>0.8333</b>         | 2.6x10 <sup>-13</sup> | 4.2x10 <sup>-15</sup> | 2.9x10 <sup>-11</sup> | 3.6x10 <sup>-15</sup>     |
| RTV | 1.0x10 <sup>-29</sup> | 1.2x10 <sup>-27</sup> | 1.8x10 <sup>-28</sup> | 4.2x10 <sup>-33</sup> | 2.9x10 <sup>-29</sup> | 1.1x10 <sup>-11</sup> | 2.9x10 <sup>-28</sup> | 3.7x10 <sup>-08</sup> | 8.9x10 <sup>-07</sup> | <b>0.0777</b>         | 3.6x10 <sup>-04</sup> | 2.9x10 <sup>-07</sup> | <b>0.1285</b>         | <b>0.8333</b>         |                       | 2.6x10 <sup>-24</sup> | 1.5x10 <sup>-26</sup> | 4.3x10 <sup>-26</sup> | 3.4x10 <sup>-24</sup>     |
| RAL | 9.1x10 <sup>-11</sup> | 5.0x10 <sup>-02</sup> | 3.1x10 <sup>-06</sup> | 4.0x10 <sup>-07</sup> | 4.2x10 <sup>-03</sup> | 5.3x10 <sup>-12</sup> | 3.0x10 <sup>-22</sup> | 1.0x10 <sup>-22</sup> | 8.4x10 <sup>-16</sup> | 4.4x10 <sup>-22</sup> | 6.6x10 <sup>-28</sup> | 1.5x10 <sup>-23</sup> | 8.9x10 <sup>-33</sup> | 2.6x10 <sup>-13</sup> | 2.6x10 <sup>-24</sup> |                       | <b>0.4354</b>         | 7.6x10 <sup>-13</sup> | 7.2x10 <sup>-04</sup>     |
| EVG | 2.3x10 <sup>-03</sup> | <b>0.7745</b>         | 9.2x10 <sup>-04</sup> | 2.4x10 <sup>-05</sup> | 1.9x10 <sup>-02</sup> | 2.9x10 <sup>-12</sup> | 3.0x10 <sup>-06</sup> | 5.3x10 <sup>-23</sup> | 5.4x10 <sup>-17</sup> | 4.0x10 <sup>-25</sup> | 4.0x10 <sup>-31</sup> | 1.5x10 <sup>-26</sup> | 9.6x10 <sup>-31</sup> | 4.2x10 <sup>-15</sup> | 1.5x10 <sup>-26</sup> | <b>0.4354</b>         |                       | 2.1x10 <sup>-10</sup> | 3.7x10 <sup>-02</sup>     |
| ENF | 5.3x10 <sup>-19</sup> | 1.6x10 <sup>-14</sup> | 7.9x10 <sup>-08</sup> | 4.6x10 <sup>-04</sup> | 1.0x10 <sup>-09</sup> | 6.5x10 <sup>-04</sup> | 1.2x10 <sup>-21</sup> | 4.5x10 <sup>-14</sup> | 3.6x10 <sup>-09</sup> | 1.4x10 <sup>-19</sup> | 2.0x10 <sup>-28</sup> | 2.8x10 <sup>-22</sup> | 5.2x10 <sup>-30</sup> | 2.9x10 <sup>-11</sup> | 4.3x10 <sup>-26</sup> | 7.6x10 <sup>-13</sup> | 2.1x10 <sup>-10</sup> |                       | 7.6x10 <sup>-14</sup>     |
| MVC | <b>0.3268</b>         | 1.4x10 <sup>-02</sup> | 2.3x10 <sup>-07</sup> | 2.0x10 <sup>-09</sup> | 6.0x10 <sup>-06</sup> | 2.1x10 <sup>-14</sup> | 8.8x10 <sup>-04</sup> | 2.8x10 <sup>-24</sup> | 3.2x10 <sup>-18</sup> | 1.1x10 <sup>-24</sup> | 1.0x10 <sup>-29</sup> | 3.2x10 <sup>-26</sup> | 2.5x10 <sup>-29</sup> | 3.6x10 <sup>-15</sup> | 3.4x10 <sup>-24</sup> | 7.2x10 <sup>-04</sup> | 3.7x10 <sup>-02</sup> | 7.6x10 <sup>-14</sup> |                           |

<sup>a</sup> $P$  values for the differences in  $m'$  between pairs of antiretroviral drugs based on the analysis of cells from ~35 donors/drug.  $m'$  is the slope of a linear regression line best representing the median-effect plot in the clinical concentration range (see Methods). Values of  $m'$  are given in **Supplementary Table S1**.  $P$  values are not corrected for multiple comparisons because each comparison between a particular pair of antiretroviral drugs is unique. As shown in **Supplementary Table S1**, slopes within a class are similar but can be very different between classes. For example, PIs have much higher slopes than NRTIs. The differences are highly significant (range of  $P$  values: 2.3x10<sup>-07</sup>-1.3x10<sup>-38</sup> for 35 NRTI-PI comparisons) and remain so even after correction for multiple comparisons.

<sup>b</sup>Differences that did not achieve statistical significance are in **bold**.

**Supplementary Table S3.** Calculation of  $IIP_{ave}$  values for single drugs.

| Drug               | Class | Dose (mg)            | Dosing interval $\tau$ (hr) | $C_{max}^a$ ( $\mu M$ ) | $t_{1/2}^b$ (hr) | $IIP_{ave} \pm SD^c$ |
|--------------------|-------|----------------------|-----------------------------|-------------------------|------------------|----------------------|
| AZT                | NRTI  | 300                  | 12                          | 4.45                    | 8.5              | 0.41 $\pm$ 0.23      |
| d4T                | NRTI  | 40                   | 12                          | 2.32                    | 3.5              | 0.28 $\pm$ 0.13      |
| 3TC                | NRTI  | 300                  | 24                          | 15.29                   | 10               | 2.44 $\pm$ 0.50      |
| FTC                | NRTI  | 200                  | 24                          | 6.80                    | 39               | 2.70 $\pm$ 0.85      |
| ABC                | NRTI  | 600                  | 24                          | 13.45                   | 18               | 2.03 $\pm$ 0.59      |
| ddI                | NRTI  | 400                  | 24                          | 39.37                   | 18               | 2.21 $\pm$ 1.07      |
| TDF                | NRTI  | 300                  | 24                          | 1.06                    | 180              | 0.89 $\pm$ 0.46      |
| EFV                | NNRTI | 600                  | 24                          | 12.97                   | 47.5             | 7.45 $\pm$ 1.31      |
| NVP                | NNRTI | 400                  | 24                          | 25.16                   | 21.5             | 4.67 $\pm$ 1.48      |
| ETR                | NNRTI | 200                  | 12                          | 1.62                    | 41               | 6.35 $\pm$ 1.00      |
| ATV/r <sup>d</sup> | PI    | 300/100 <sup>d</sup> | 24                          | 6.26                    | 8.6              | 7.28 $\pm$ 1.46      |
| DRV/r <sup>d</sup> | PI    | 600/100 <sup>d</sup> | 12                          | 14.79                   | 15               | 10.55 $\pm$ 2.10     |
| LPV/r <sup>d</sup> | PI    | 400/100 <sup>d</sup> | 12                          | 15.58                   | 9.9              | 7.01 $\pm$ 0.67      |
| NFV                | PI    | 1250                 | 12                          | 7.04                    | 4.25             | 2.81 $\pm$ 0.67      |
| RTV <sup>e</sup>   | PI    | 100                  | 24                          | 1.36                    | 4.8              | 0.92 $\pm$ 0.17      |
| RAL                | InSTI | 400                  | 12                          | 4.50                    | 9.5              | 1.83 $\pm$ 0.38      |
| EVG/c <sup>f</sup> | InSTI | 150                  | 24                          | 5.94                    | 9.15             | 1.51 $\pm$ 0.33      |
| ENF                | FI    | 90                   | 12                          | 1.11                    | 3.8              | 2.07 $\pm$ 0.69      |
| MVC                | CRA   | 300                  | 12                          | 0.56                    | 16               | 1.71 $\pm$ 0.89      |

<sup>a</sup> $C_{max}$  values were taken from published pharmacokinetic studies summarized in by Acosta et al. (Acosta, E. P., Gerber, J. G. & Kuritzkes, D. R. in HIV Third Edition pp115-136. Libman, H. and Makadon, H.J. Eds. American College of Physicians, 2007) or package insert information.

<sup>b</sup> $t_{1/2}$  values were taken from published pharmacokinetic studies cited above. For NRTIs,  $t_{1/2}$  is for the intracellular triphosphate form.

<sup>c</sup>Mean and SD of  $IIP_{ave}$  values calculated for individual donors as described in Supplemental Information, Methods. Individual variability in pharmacodynamics parameters gives rise to some variability in  $IIP_{ave}$ . However, the differences in  $IIP_{ave}$  values for different drugs are highly significant for most comparisons (**Supplementary Table S4**). This analysis does not consider individual variation in pharmacokinetics,

which is likely to provide additional variation. Nevertheless, the striking multilog differences in  $IIP_{ave}$  provide insight into the general activity of these drugs in populations of patients.

<sup>d</sup>Pharmacokinetic data are for coadministration (boosting) with 100 mg RTV.

<sup>e</sup>The  $C_{max}$  for RTV is for the 100 mg dose used for pharmacokinetic boosting.

<sup>f</sup>Pharmacokinetic data are for coadministration (boosting) with cobicistat.

**Supplementary Table S4.** Statistical significance of differences in  $IIP_{ave}$  values for different antiretroviral drugs<sup>a</sup>.

|                  | AZT                   | d4T                   | 3TC                   | FTC                       | ABC                   | ddI                   | TDF                   | EFV                   | NVP                   | ETR                   | ATV                   | DRV                   | LPV                   | NFV                   | RTV <sup>c</sup>      | RAL                   | EVG                   | ENF                   | MVC                   |
|------------------|-----------------------|-----------------------|-----------------------|---------------------------|-----------------------|-----------------------|-----------------------|-----------------------|-----------------------|-----------------------|-----------------------|-----------------------|-----------------------|-----------------------|-----------------------|-----------------------|-----------------------|-----------------------|-----------------------|
| AZT              |                       | 7.8x10 <sup>-04</sup> | 1.7x10 <sup>-36</sup> | 1.9x10 <sup>-27</sup>     | 3.4x10 <sup>-21</sup> | 5.7x10 <sup>-12</sup> | 2.4x10 <sup>-05</sup> | 1.0x10 <sup>-26</sup> | 1.7x10 <sup>-17</sup> | 2.9x10 <sup>-20</sup> | 7.4x10 <sup>-22</sup> | 6.8x10 <sup>-25</sup> | 8.9x10 <sup>-29</sup> | 5.3x10 <sup>-13</sup> | 1.5x10 <sup>-12</sup> | 3.6x10 <sup>-24</sup> | 6.7x10 <sup>-24</sup> | 4.0x10 <sup>-11</sup> | 3.6x10 <sup>-04</sup> |
| d4T              | 7.8x10 <sup>-04</sup> |                       | 5.7x10 <sup>-35</sup> | 8.0x10 <sup>-28</sup>     | 8.6x10 <sup>-22</sup> | 1.2x10 <sup>-12</sup> | 3.9x10 <sup>-07</sup> | 1.5x10 <sup>-26</sup> | 1.3x10 <sup>-17</sup> | 4.4x10 <sup>-20</sup> | 7.3x10 <sup>-22</sup> | 6.3x10 <sup>-25</sup> | 1.6x10 <sup>-27</sup> | 4.3x10 <sup>-13</sup> | 2.4x10 <sup>-14</sup> | 2.2x10 <sup>-23</sup> | 6.8x10 <sup>-24</sup> | 1.4x10 <sup>-11</sup> | 1.6x10 <sup>-04</sup> |
| 3TC              | 1.7x10 <sup>-36</sup> | 5.7x10 <sup>-35</sup> |                       | <b>0.0537<sup>b</sup></b> | 8.2x10 <sup>-10</sup> | <b>0.2148</b>         | 5.3x10 <sup>-19</sup> | 2.8x10 <sup>-23</sup> | 6.7x10 <sup>-11</sup> | 2.7x10 <sup>-17</sup> | 2.4x10 <sup>-18</sup> | 2.1x10 <sup>-22</sup> | 2.4x10 <sup>-29</sup> | 3.5x10 <sup>-02</sup> | 9.9x10 <sup>-28</sup> | 2.5x10 <sup>-08</sup> | 2.6x10 <sup>-16</sup> | 3.1x10 <sup>-02</sup> | 1.8x10 <sup>-02</sup> |
| FTC              | 1.9x10 <sup>-27</sup> | 8.0x10 <sup>-28</sup> | <b>0.0537</b>         |                           | 2.5x10 <sup>-10</sup> | 1.8x10 <sup>-02</sup> | 6.4x10 <sup>-20</sup> | 2.2x10 <sup>-24</sup> | 1.1x10 <sup>-09</sup> | 3.3x10 <sup>-18</sup> | 9.3x10 <sup>-19</sup> | 5.1x10 <sup>-23</sup> | 2.5x10 <sup>-33</sup> | <b>0.5926</b>         | 6.3x10 <sup>-22</sup> | 5.7x10 <sup>-09</sup> | 4.3x10 <sup>-14</sup> | 1.3x10 <sup>-03</sup> | 2.9x10 <sup>-03</sup> |
| ABC              | 3.4x10 <sup>-21</sup> | 8.6x10 <sup>-22</sup> | 8.2x10 <sup>-10</sup> | 2.5x10 <sup>-10</sup>     |                       | 1.0x10 <sup>-02</sup> | 5.8x10 <sup>-09</sup> | 9.8x10 <sup>-26</sup> | 3.6x10 <sup>-14</sup> | 1.4x10 <sup>-19</sup> | 2.3x10 <sup>-20</sup> | 8.6x10 <sup>-24</sup> | 1.7x10 <sup>-32</sup> | 3.5x10 <sup>-07</sup> | 1.9x10 <sup>-12</sup> | <b>0.2223</b>         | 4.0x10 <sup>-02</sup> | 3.1x10 <sup>-02</sup> | <b>0.9861</b>         |
| ddI              | 5.7x10 <sup>-12</sup> | 1.2x10 <sup>-12</sup> | <b>0.2148</b>         | 1.8x10 <sup>-02</sup>     | 1.0x10 <sup>-02</sup> |                       | 1.5x10 <sup>-08</sup> | 1.2x10 <sup>-26</sup> | 8.0x10 <sup>-12</sup> | 1.4x10 <sup>-20</sup> | 3.0x10 <sup>-21</sup> | 1.8x10 <sup>-25</sup> | 3.0x10 <sup>-29</sup> | 1.1x10 <sup>-02</sup> | 1.4x10 <sup>-08</sup> | 4.7x10 <sup>-02</sup> | 3.7x10 <sup>-04</sup> | <b>0.5602</b>         | <b>0.1233</b>         |
| TDF              | 2.4x10 <sup>-05</sup> | 3.9x10 <sup>-07</sup> | 5.3x10 <sup>-19</sup> | 6.4x10 <sup>-20</sup>     | 5.8x10 <sup>-09</sup> | 1.5x10 <sup>-08</sup> |                       | 1.3x10 <sup>-28</sup> | 1.7x10 <sup>-17</sup> | 3.2x10 <sup>-22</sup> | 1.1x10 <sup>-22</sup> | 1.9x10 <sup>-25</sup> | 1.7x10 <sup>-35</sup> | 2.2x10 <sup>-12</sup> | <b>0.7729</b>         | 5.1x10 <sup>-11</sup> | 6.7x10 <sup>-07</sup> | 2.9x10 <sup>-08</sup> | 9.4x10 <sup>-03</sup> |
| EFV              | 1.0x10 <sup>-26</sup> | 1.5x10 <sup>-26</sup> | 2.8x10 <sup>-23</sup> | 2.2x10 <sup>-24</sup>     | 9.8x10 <sup>-26</sup> | 1.2x10 <sup>-26</sup> | 1.3x10 <sup>-28</sup> |                       | 2.9x10 <sup>-12</sup> | 6.3x10 <sup>-04</sup> | <b>0.6368</b>         | 1.1x10 <sup>-09</sup> | <b>0.1017</b>         | 7.1x10 <sup>-23</sup> | 7.9x10 <sup>-26</sup> | 9.1x10 <sup>-25</sup> | 3.9x10 <sup>-25</sup> | 2.9x10 <sup>-26</sup> | 2.2x10 <sup>-16</sup> |
| NVP              | 1.7x10 <sup>-17</sup> | 1.3x10 <sup>-17</sup> | 6.7x10 <sup>-11</sup> | 1.1x10 <sup>-09</sup>     | 3.6x10 <sup>-14</sup> | 8.0x10 <sup>-12</sup> | 1.7x10 <sup>-17</sup> | 2.9x10 <sup>-12</sup> |                       | 1.1x10 <sup>-06</sup> | 6.0x10 <sup>-10</sup> | 2.1x10 <sup>-19</sup> | 1.7x10 <sup>-11</sup> | 1.5x10 <sup>-08</sup> | 3.7x10 <sup>-16</sup> | 1.8x10 <sup>-13</sup> | 1.6x10 <sup>-14</sup> | 1.3x10 <sup>-12</sup> | 2.3x10 <sup>-09</sup> |
| ETR              | 2.9x10 <sup>-20</sup> | 4.4x10 <sup>-20</sup> | 2.7x10 <sup>-17</sup> | 3.3x10 <sup>-18</sup>     | 1.4x10 <sup>-19</sup> | 1.4x10 <sup>-20</sup> | 3.2x10 <sup>-22</sup> | 6.3x10 <sup>-04</sup> | 1.1x10 <sup>-06</sup> |                       | 7.6x10 <sup>-03</sup> | 9.0x10 <sup>-14</sup> | 9.2x10 <sup>-03</sup> | 4.4x10 <sup>-17</sup> | 1.6x10 <sup>-19</sup> | 1.1x10 <sup>-18</sup> | 5.5x10 <sup>-19</sup> | 2.7x10 <sup>-20</sup> | 2.8x10 <sup>-13</sup> |
| ATV              | 7.4x10 <sup>-22</sup> | 7.3x10 <sup>-22</sup> | 2.4x10 <sup>-18</sup> | 9.3x10 <sup>-19</sup>     | 2.3x10 <sup>-20</sup> | 3.0x10 <sup>-21</sup> | 1.1x10 <sup>-22</sup> | <b>0.6368</b>         | 6.0x10 <sup>-10</sup> | 7.6x10 <sup>-03</sup> |                       | 8.8x10 <sup>-10</sup> | <b>0.3713</b>         | 2.2x10 <sup>-18</sup> | 5.1x10 <sup>-21</sup> | 1.0x10 <sup>-19</sup> | 3.4x10 <sup>-20</sup> | 5.7x10 <sup>-21</sup> | 2.6x10 <sup>-16</sup> |
| DRV              | 6.8x10 <sup>-25</sup> | 6.3x10 <sup>-25</sup> | 2.1x10 <sup>-22</sup> | 5.1x10 <sup>-23</sup>     | 8.6x10 <sup>-24</sup> | 1.8x10 <sup>-25</sup> | 1.9x10 <sup>-25</sup> | 1.1x10 <sup>-09</sup> | 2.1x10 <sup>-19</sup> | 9.0x10 <sup>-14</sup> | 8.8x10 <sup>-10</sup> |                       | 1.3x10 <sup>-11</sup> | 2.4x10 <sup>-23</sup> | 3.0x10 <sup>-24</sup> | 2.5x10 <sup>-23</sup> | 1.2x10 <sup>-23</sup> | 7.4x10 <sup>-25</sup> | 3.8x10 <sup>-23</sup> |
| LPV              | 8.9x10 <sup>-29</sup> | 1.6x10 <sup>-27</sup> | 2.4x10 <sup>-29</sup> | 2.5x10 <sup>-33</sup>     | 1.7x10 <sup>-32</sup> | 3.0x10 <sup>-29</sup> | 1.7x10 <sup>-35</sup> | <b>0.0107</b>         | 1.7x10 <sup>-11</sup> | 9.2x10 <sup>-03</sup> | <b>0.3713</b>         | 1.3x10 <sup>-11</sup> |                       | 1.2x10 <sup>-23</sup> | 2.2x10 <sup>-28</sup> | 3.8x10 <sup>-30</sup> | 1.7x10 <sup>-29</sup> | 1.4x10 <sup>-28</sup> | 1.2x10 <sup>-12</sup> |
| NFV              | 5.3x10 <sup>-13</sup> | 4.3x10 <sup>-13</sup> | 3.5x10 <sup>-02</sup> | <b>0.5926</b>             | 3.5x10 <sup>-07</sup> | 1.1x10 <sup>-02</sup> | 2.2x10 <sup>-12</sup> | 7.1x10 <sup>-23</sup> | 1.5x10 <sup>-08</sup> | 4.4x10 <sup>-17</sup> | 2.2x10 <sup>-18</sup> | 2.4x10 <sup>-23</sup> | 1.2x10 <sup>-23</sup> |                       | 3.7x10 <sup>-11</sup> | 2.6x10 <sup>-06</sup> | 2.1x10 <sup>-08</sup> | 1.1x10 <sup>-03</sup> | 1.6x10 <sup>-03</sup> |
| RTV <sup>c</sup> | 1.5x10 <sup>-12</sup> | 2.4x10 <sup>-14</sup> | 9.9x10 <sup>-28</sup> | 6.3x10 <sup>-22</sup>     | 1.9x10 <sup>-12</sup> | 1.4x10 <sup>-08</sup> | <b>0.7729</b>         | 7.9x10 <sup>-26</sup> | 3.7x10 <sup>-16</sup> | 1.6x10 <sup>-19</sup> | 5.1x10 <sup>-21</sup> | 3.0x10 <sup>-24</sup> | 2.2x10 <sup>-28</sup> | 3.7x10 <sup>-11</sup> |                       | 7.4x10 <sup>-16</sup> | 1.3x10 <sup>-11</sup> | 4.0x10 <sup>-08</sup> | 1.1x10 <sup>-02</sup> |
| RAL              | 3.6x10 <sup>-24</sup> | 2.2x10 <sup>-23</sup> | 2.5x10 <sup>-08</sup> | 5.7x10 <sup>-09</sup>     | <b>0.2223</b>         | 4.7x10 <sup>-02</sup> | 5.1x10 <sup>-11</sup> | 9.1x10 <sup>-25</sup> | 1.8x10 <sup>-13</sup> | 1.1x10 <sup>-18</sup> | 1.0x10 <sup>-19</sup> | 2.5x10 <sup>-23</sup> | 3.8x10 <sup>-30</sup> | 2.6x10 <sup>-06</sup> | 7.4x10 <sup>-16</sup> |                       | 3.7x10 <sup>-04</sup> | <b>0.1355</b>         | <b>0.6572</b>         |
| EVG              | 6.7x10 <sup>-24</sup> | 6.8x10 <sup>-24</sup> | 2.6x10 <sup>-16</sup> | 4.3x10 <sup>-14</sup>     | 4.0x10 <sup>-02</sup> | 3.7x10 <sup>-04</sup> | 6.7x10 <sup>-07</sup> | 3.9x10 <sup>-25</sup> | 1.6x10 <sup>-14</sup> | 5.5x10 <sup>-19</sup> | 3.4x10 <sup>-20</sup> | 1.2x10 <sup>-23</sup> | 1.7x10 <sup>-29</sup> | 2.1x10 <sup>-08</sup> | 1.3x10 <sup>-11</sup> | 3.7x10 <sup>-04</sup> |                       | 9.6x10 <sup>-04</sup> | <b>0.4516</b>         |
| ENF              | 4.0x10 <sup>-11</sup> | 1.4x10 <sup>-11</sup> | 3.1x10 <sup>-02</sup> | 1.3x10 <sup>-03</sup>     | 3.1x10 <sup>-02</sup> | <b>0.5602</b>         | 2.9x10 <sup>-08</sup> | 2.9x10 <sup>-26</sup> | 1.3x10 <sup>-12</sup> | 2.7x10 <sup>-20</sup> | 5.7x10 <sup>-21</sup> | 7.4x10 <sup>-25</sup> | 1.4x10 <sup>-28</sup> | 1.1x10 <sup>-03</sup> | 4.0x10 <sup>-08</sup> | <b>0.1355</b>         | 9.6x10 <sup>-04</sup> |                       | <b>0.2329</b>         |
| MVC              | 3.6x10 <sup>-04</sup> | 1.6x10 <sup>-04</sup> | 1.8x10 <sup>-02</sup> | 2.9x10 <sup>-05</sup>     | <b>0.9861</b>         | <b>0.1233</b>         | 9.4x10 <sup>-05</sup> | 2.2x10 <sup>-16</sup> | 2.3x10 <sup>-09</sup> | 2.8x10 <sup>-13</sup> | 2.6x10 <sup>-16</sup> | 3.8x10 <sup>-23</sup> | 1.2x10 <sup>-12</sup> | 1.6x10 <sup>-05</sup> | 1.1x10 <sup>-02</sup> | <b>0.6572</b>         | <b>0.4516</b>         | <b>0.2329</b>         |                       |

<sup>a</sup> $P$  values for the differences in  $IIP_{ave}$  between pairs of antiretroviral drugs based on the analysis of cells from ~35 donors/drug.  $IIP_{ave}$  values are given in

**Supplementary Table S3.**

<sup>b</sup>Differences that did not achieve statistical significance are in **bold**.

<sup>c</sup> $IIP_{ave}$  values for RTV are based on concentrations achieved with the 100 mg qd boosting dose.

**Supplementary Table S5.** Mean and SD of *DI* index values for drug combinations<sup>a</sup>.

|     | AZT         | d4T         | 3TC         | FTC         | ddI          | TDF          | ABC          | NVP          | ETR          | EFV         | RAL         | ELV         | RTV         | ATV         | DRV         | LPV         | NFV         | ENF         | MVC <sup>b</sup> |
|-----|-------------|-------------|-------------|-------------|--------------|--------------|--------------|--------------|--------------|-------------|-------------|-------------|-------------|-------------|-------------|-------------|-------------|-------------|------------------|
| AZT |             | 0.00 ± 0.18 | 1.64 ± 0.29 | 2.07 ± 0.27 | 2.30 ± 0.52  | 2.82 ± 0.72  | 2.52 ± 0.48  | 2.30 ± 0.60  | 3.75 ± 0.68  | 4.23 ± 0.75 | 1.06 ± 0.09 | 1.15 ± 0.28 | 0.78 ± 0.26 | 0.34 ± 0.13 | 0.63 ± 0.05 | 1.36 ± 0.44 | 1.21 ± 0.69 | 1.20 ± 0.47 | 0.94 ± 0.14      |
| d4T | 0.00 ± 0.18 |             | 1.68 ± 0.45 | 1.68 ± 0.14 | 2.92 ± 0.61  | 3.24 ± 0.57  | 2.02 ± 0.52  | 1.87 ± 0.48  | 1.80 ± 0.28  | 2.61 ± 0.17 | 1.29 ± 0.36 | 1.16 ± 0.36 | 0.72 ± 0.24 | 0.36 ± 0.22 | 0.88 ± 0.50 | 0.63 ± 0.25 | 0.65 ± 0.50 | 1.07 ± 0.20 | 0.91 ± 0.32      |
| 3TC | 1.64 ± 0.29 | 1.68 ± 0.45 |             | 0.07 ± 0.18 | 0.24 ± 0.39  | 0.78 ± 0.63  | 0.20 ± 0.13  | 0.55 ± 0.18  | 0.24 ± 0.16  | 0.45 ± 0.19 | 1.01 ± 0.11 | 1.25 ± 0.20 | 0.37 ± 0.12 | 0.40 ± 0.30 | 0.62 ± 0.27 | 0.49 ± 0.25 | 0.62 ± 0.37 | 1.10 ± 0.45 | 1.75 ± 0.54      |
| FTC | 2.07 ± 0.27 | 1.68 ± 0.14 | 0.07 ± 0.18 |             | 0.31 ± 0.26  | 0.33 ± 0.20  | 0.03 ± 0.05  | 0.63 ± 0.10  | 0.19 ± 0.09  | 0.46 ± 0.06 | 1.08 ± 0.45 | 1.06 ± 0.23 | 0.53 ± 0.18 | 0.56 ± 0.19 | 0.50 ± 0.22 | 0.62 ± 0.25 | 0.74 ± 0.26 | 0.75 ± 0.24 | 1.16 ± 0.18      |
| ddI | 2.30 ± 0.52 | 2.92 ± 0.61 | 0.24 ± 0.39 | 0.31 ± 0.26 |              | -0.05 ± 0.13 | 0.21 ± 0.10  | 0.82 ± 0.37  | -0.04 ± 0.06 | 0.55 ± 0.14 | 0.91 ± 0.28 | 1.17 ± 0.32 | 0.26 ± 0.19 | 0.71 ± 0.20 | 0.49 ± 0.17 | 0.74 ± 0.18 | 0.63 ± 0.34 | 0.82 ± 0.23 | 1.12 ± 0.11      |
| TDF | 2.82 ± 0.72 | 3.24 ± 0.57 | 0.78 ± 0.63 | 0.33 ± 0.20 | -0.05 ± 0.13 |              | -0.03 ± 0.30 | 1.03 ± 0.24  | 0.16 ± 0.11  | 0.71 ± 0.40 | 1.19 ± 0.45 | 0.97 ± 0.08 | 0.47 ± 0.17 | 0.42 ± 0.12 | 0.45 ± 0.12 | 0.50 ± 0.23 | 0.47 ± 0.24 | 0.65 ± 0.50 | 1.43 ± 0.10      |
| ABC | 2.52 ± 0.48 | 2.02 ± 0.52 | 0.20 ± 0.13 | 0.03 ± 0.05 | 0.21 ± 0.10  | -0.03 ± 0.30 |              | 0.62 ± 0.21  | 0.17 ± 0.10  | 0.76 ± 0.89 | 0.90 ± 0.13 | 1.04 ± 0.36 | 0.41 ± 0.19 | 0.55 ± 0.13 | 0.78 ± 0.20 | 0.54 ± 0.27 | 0.82 ± 0.46 | 0.77 ± 0.53 | 1.33 ± 0.21      |
| NVP | 2.30 ± 0.60 | 1.87 ± 0.48 | 0.55 ± 0.18 | 0.63 ± 0.10 | 0.82 ± 0.37  | 1.03 ± 0.24  | 0.62 ± 0.21  |              | -0.12 ± 0.09 | 0.07 ± 0.16 | 1.14 ± 0.29 | 1.82 ± 0.60 | 0.80 ± 0.00 | 0.64 ± 0.46 | 0.43 ± 0.31 | 0.87 ± 0.23 | 1.08 ± 0.15 | 0.84 ± 0.26 | 1.64 ± 0.27      |
| ETR | 3.75 ± 0.68 | 1.80 ± 0.28 | 0.24 ± 0.16 | 0.19 ± 0.09 | -0.04 ± 0.06 | 0.16 ± 0.11  | 0.17 ± 0.10  | -0.12 ± 0.09 |              | 0.19 ± 0.29 | 0.84 ± 0.23 | 0.88 ± 0.16 | 0.53 ± 0.33 | 0.78 ± 0.21 | 0.99 ± 0.63 | 0.82 ± 0.24 | 1.49 ± 0.13 | 0.92 ± 0.47 | 1.80 ± 0.48      |
| EFV | 4.23 ± 0.75 | 2.61 ± 0.17 | 0.45 ± 0.19 | 0.46 ± 0.06 | 0.55 ± 0.14  | 0.71 ± 0.40  | 0.76 ± 0.89  | 0.07 ± 0.16  | 0.19 ± 0.29  |             | 1.30 ± 0.45 | 1.07 ± 0.20 | 0.81 ± 0.21 | 0.74 ± 0.45 | 0.70 ± 0.26 | 0.93 ± 0.21 | 1.27 ± 0.26 | 0.89 ± 0.27 | 1.67 ± 0.12      |
| RAL | 1.06 ± 0.09 | 1.29 ± 0.36 | 1.01 ± 0.11 | 1.08 ± 0.45 | 0.91 ± 0.28  | 1.19 ± 0.45  | 0.90 ± 0.13  | 1.14 ± 0.29  | 0.84 ± 0.23  | 1.30 ± 0.45 |             | 0.04 ± 0.13 | 0.97 ± 0.32 | 1.52 ± 0.73 | 1.12 ± 0.40 | 1.32 ± 0.25 | 1.90 ± 0.40 | 1.14 ± 0.15 | 1.36 ± 0.20      |
| ELV | 1.15 ± 0.28 | 1.16 ± 0.36 | 1.25 ± 0.20 | 1.06 ± 0.23 | 1.17 ± 0.32  | 0.97 ± 0.08  | 1.04 ± 0.36  | 1.82 ± 0.60  | 0.88 ± 0.16  | 1.07 ± 0.20 | 0.04 ± 0.13 |             | 1.25 ± 0.25 | 1.51 ± 0.54 | 1.04 ± 0.24 | 1.57 ± 0.48 | 1.32 ± 0.21 | 0.98 ± 0.34 | 1.05 ± 0.32      |
| RTV | 0.78 ± 0.26 | 0.72 ± 0.24 | 0.37 ± 0.12 | 0.53 ± 0.18 | 0.26 ± 0.19  | 0.47 ± 0.17  | 0.41 ± 0.19  | 0.80 ± 0.00  | 0.53 ± 0.33  | 0.81 ± 0.21 | 0.97 ± 0.32 | 1.25 ± 0.25 |             | 0.33 ± 0.13 | 1.04 ± 0.38 | 0.58 ± 0.05 | 0.22 ± 0.16 | 0.16 ± 0.16 | ND               |
| ATV | 0.34 ± 0.13 | 0.36 ± 0.22 | 0.40 ± 0.30 | 0.56 ± 0.19 | 0.71 ± 0.20  | 0.42 ± 0.12  | 0.55 ± 0.13  | 0.64 ± 0.46  | 0.78 ± 0.21  | 0.74 ± 0.45 | 1.52 ± 0.73 | 1.51 ± 0.54 | 0.33 ± 0.13 |             | 0.27 ± 0.36 | 0.45 ± 0.11 | 0.44 ± 0.26 | 0.81 ± 0.15 | ND               |
| DRV | 0.63 ± 0.05 | 0.88 ± 0.50 | 0.62 ± 0.27 | 0.50 ± 0.22 | 0.49 ± 0.17  | 0.45 ± 0.12  | 0.78 ± 0.20  | 0.43 ± 0.31  | 0.99 ± 0.63  | 0.70 ± 0.26 | 1.12 ± 0.40 | 1.04 ± 0.24 | 1.04 ± 0.38 | 0.27 ± 0.36 |             | 0.40 ± 0.44 | 0.80 ± 0.56 | 0.05 ± 0.30 | ND               |
| LPV | 1.36 ± 0.44 | 0.63 ± 0.25 | 0.49 ± 0.25 | 0.62 ± 0.25 | 0.74 ± 0.18  | 0.50 ± 0.23  | 0.54 ± 0.27  | 0.87 ± 0.23  | 0.82 ± 0.24  | 0.93 ± 0.21 | 1.32 ± 0.25 | 1.57 ± 0.48 | 0.58 ± 0.05 | 0.45 ± 0.11 | 0.40 ± 0.44 |             | 0.29 ± 0.28 | 0.60 ± 0.31 | ND               |
| NFV | 1.21 ± 0.69 | 0.65 ± 0.50 | 0.62 ± 0.37 | 0.74 ± 0.26 | 0.63 ± 0.34  | 0.47 ± 0.24  | 0.82 ± 0.46  | 1.08 ± 0.15  | 1.49 ± 0.13  | 1.27 ± 0.26 | 1.90 ± 0.40 | 1.32 ± 0.21 | 0.22 ± 0.16 | 0.44 ± 0.26 | 0.80 ± 0.56 | 0.29 ± 0.28 |             | 1.17 ± 0.36 | ND               |
| ENF | 1.20 ± 0.47 | 1.07 ± 0.20 | 1.10 ± 0.45 | 0.75 ± 0.24 | 0.82 ± 0.23  | 0.65 ± 0.50  | 0.77 ± 0.53  | 0.84 ± 0.26  | 0.92 ± 0.47  | 0.89 ± 0.27 | 1.14 ± 0.15 | 0.98 ± 0.34 | 0.16 ± 0.16 | 0.81 ± 0.15 | 0.05 ± 0.30 | 0.60 ± 0.31 | 1.17 ± 0.36 |             | 1.59 ± 0.42      |
| MVC | 0.94 ± 0.14 | 0.91 ± 0.32 | 1.75 ± 0.54 | 1.16 ± 0.18 | 1.12 ± 0.11  | 1.43 ± 0.10  | 1.33 ± 0.21  | 1.64 ± 0.27  | 1.80 ± 0.48  | 1.67 ± 0.12 | 1.36 ± 0.20 | 1.05 ± 0.32 | ND          | ND          | ND          | ND          | ND          | 1.59 ± 0.42 |                  |

<sup>a</sup>Each combination was tested in cells from 4-12 donors, and the *DI* was computed for each donor according to Equation 5 using the drug concentrations giving the highest difference between the Loewe and Bliss predictions.

<sup>b</sup>ND = not done. Because of the lower levels of infection achieved with R5-tropic pseudoviruses, PI-MVC combinations could not be analyzed.



Table S6.  $IIP_{ave}$  values for three drug regimens and component single drugs and drug pairs.

| Regimen <sup>a</sup> |        |        | $IIP_{ave}$ |      |      |                    |      |      |       |                    |      |      |       |                         |      |      |       |  |
|----------------------|--------|--------|-------------|------|------|--------------------|------|------|-------|--------------------|------|------|-------|-------------------------|------|------|-------|--|
|                      |        |        | Single drug |      |      | Loewe <sup>b</sup> |      |      |       | Bliss <sup>c</sup> |      |      |       | $DI$ Index <sup>d</sup> |      |      |       |  |
| Drug 1               | Drug 2 | Drug 3 | 1           | 2    | 3    | 1,2                | 1,3  | 2,3  | 1,2,3 | 1,2                | 1,3  | 2,3  | 1,2,3 | 1,2                     | 1,3  | 2,3  | 1,2,3 |  |
| AZTb                 | d4T    | ddIb   | 0.37        | 0.25 | 0.75 | 0.45               | 0.83 | 0.82 | 0.88  | 0.62               | 1.11 | 0.99 | 1.36  | 0.45                    | 1.50 | 1.32 | 2.06  |  |
| AZTb                 | d4T    | ddIb   | 0.39        | 0.25 | 0.75 | 0.47               | 0.84 | 0.82 | 0.89  | 0.64               | 1.14 | 0.99 | 1.39  | 0.47                    | 1.54 | 1.32 | 2.09  |  |
| AZTb                 | d4T    | TDF    | 0.37        | 0.25 | 0.86 | 0.45               | 0.87 | 0.87 | 0.89  | 0.62               | 1.23 | 1.11 | 1.48  | 0.45                    | 1.91 | 1.65 | 2.61  |  |
| AZTt                 | d4T    | TDF    | 0.39        | 0.25 | 0.86 | 0.47               | 0.87 | 0.87 | 0.89  | 0.64               | 1.25 | 1.11 | 1.50  | 0.47                    | 1.98 | 1.65 | 2.66  |  |
| AZTb                 | d4T    | ddIq   | 0.37        | 0.25 | 0.84 | 0.45               | 0.91 | 0.90 | 0.96  | 0.62               | 1.21 | 1.09 | 1.46  | 0.45                    | 1.60 | 1.43 | 2.18  |  |
| AZTt                 | d4T    | ddIq   | 0.39        | 0.25 | 0.84 | 0.47               | 0.92 | 0.90 | 0.97  | 0.64               | 1.23 | 1.09 | 1.48  | 0.47                    | 1.64 | 1.43 | 2.21  |  |
| d4T                  | ddIb   | TDF    | 0.25        | 0.75 | 0.86 | 0.82               | 0.87 | 1.06 | 1.08  | 0.99               | 1.11 | 1.61 | 1.85  | 1.34                    | 1.65 | 0.98 | 2.91  |  |
| AZTb                 | ddIb   | TDF    | 0.37        | 0.75 | 0.86 | 0.83               | 0.87 | 1.06 | 1.07  | 1.11               | 1.23 | 1.61 | 1.97  | 1.51                    | 1.91 | 0.98 | 2.90  |  |
| d4T                  | ddIq   | TDF    | 0.25        | 0.84 | 0.86 | 0.90               | 0.87 | 1.10 | 1.12  | 1.09               | 1.11 | 1.70 | 1.95  | 1.45                    | 1.65 | 1.03 | 3.05  |  |
| AZTt                 | ddIb   | TDF    | 0.39        | 0.75 | 0.86 | 0.84               | 0.87 | 1.06 | 1.07  | 1.14               | 1.25 | 1.61 | 2.00  | 1.55                    | 1.98 | 0.98 | 2.97  |  |
| AZTb                 | ddIq   | TDF    | 0.37        | 0.84 | 0.86 | 0.91               | 0.87 | 1.10 | 1.11  | 1.21               | 1.23 | 1.70 | 2.07  | 1.61                    | 1.91 | 1.03 | 3.03  |  |
| AZTt                 | ddIq   | TDF    | 0.39        | 0.84 | 0.86 | 0.92               | 0.87 | 1.10 | 1.12  | 1.23               | 1.25 | 1.70 | 2.09  | 1.66                    | 1.98 | 1.03 | 3.09  |  |
| AZTb                 | d4T    | EVG/c  | 0.37        | 0.25 | 1.41 | 0.45               | 1.42 | 1.42 | 1.42  | 0.62               | 1.78 | 1.66 | 2.03  | 0.45                    | 1.83 | 1.69 | 2.07  |  |
| AZTt                 | d4T    | EVG/c  | 0.39        | 0.25 | 1.41 | 0.47               | 1.42 | 1.42 | 1.43  | 0.64               | 1.81 | 1.66 | 2.06  | 0.47                    | 1.86 | 1.69 | 2.09  |  |
| d4T                  | TDF    | EVG/c  | 0.25        | 0.86 | 1.41 | 0.87               | 1.42 | 1.43 | 1.44  | 1.11               | 1.66 | 2.27 | 2.52  | 1.67                    | 1.69 | 2.24 | 3.29  |  |
| AZTb                 | d4T    | RAL    | 0.37        | 0.25 | 1.69 | 0.45               | 1.69 | 1.69 | 1.69  | 0.62               | 2.05 | 1.94 | 2.30  | 0.45                    | 2.07 | 2.00 | 2.37  |  |
| d4T                  | ddIb   | EVG/c  | 0.25        | 0.75 | 1.41 | 0.82               | 1.42 | 1.60 | 1.60  | 0.99               | 1.66 | 2.16 | 2.41  | 1.34                    | 1.69 | 2.25 | 2.90  |  |
| AZTt                 | d4T    | RAL    | 0.39        | 0.25 | 1.69 | 0.47               | 1.69 | 1.69 | 1.69  | 0.64               | 2.08 | 1.94 | 2.33  | 0.47                    | 2.10 | 2.00 | 2.39  |  |
| AZTb                 | d4T    | MVC    | 0.37        | 0.25 | 1.72 | 0.45               | 1.72 | 1.73 | 1.73  | 0.62               | 2.09 | 1.97 | 2.34  | 0.45                    | 2.06 | 1.95 | 2.26  |  |
| AZTb                 | TDF    | EVG/c  | 0.37        | 0.86 | 1.41 | 0.87               | 1.42 | 1.43 | 1.44  | 1.23               | 1.78 | 2.27 | 2.64  | 1.92                    | 1.83 | 2.24 | 3.39  |  |
| AZTt                 | d4T    | MVC    | 0.39        | 0.25 | 1.72 | 0.47               | 1.72 | 1.73 | 1.73  | 0.64               | 2.12 | 1.97 | 2.36  | 0.47                    | 2.09 | 1.95 | 2.27  |  |
| AZTt                 | TDF    | EVG/c  | 0.39        | 0.86 | 1.41 | 0.87               | 1.42 | 1.43 | 1.44  | 1.25               | 1.81 | 2.27 | 2.67  | 1.99                    | 1.86 | 2.24 | 3.45  |  |
| d4T                  | ddIq   | EVG/c  | 0.25        | 0.84 | 1.41 | 0.90               | 1.42 | 1.62 | 1.62  | 1.09               | 1.66 | 2.25 | 2.50  | 1.45                    | 1.69 | 2.36 | 3.06  |  |
| AZTb                 | ddIb   | EVG/c  | 0.37        | 0.75 | 1.41 | 0.83               | 1.42 | 1.60 | 1.60  | 1.11               | 1.78 | 2.16 | 2.53  | 1.51                    | 1.83 | 2.25 | 2.96  |  |
| AZTt                 | ddIb   | EVG/c  | 0.39        | 0.75 | 1.41 | 0.84               | 1.42 | 1.60 | 1.60  | 1.14               | 1.81 | 2.16 | 2.55  | 1.55                    | 1.86 | 2.25 | 3.00  |  |
| AZTb                 | ddIq   | EVG/c  | 0.37        | 0.84 | 1.41 | 0.91               | 1.42 | 1.62 | 1.62  | 1.21               | 1.78 | 2.25 | 2.62  | 1.61                    | 1.83 | 2.36 | 3.10  |  |
| AZTt                 | ddIq   | EVG/c  | 0.39        | 0.84 | 1.41 | 0.92               | 1.42 | 1.62 | 1.62  | 1.23               | 1.81 | 2.25 | 2.65  | 1.66                    | 1.86 | 2.36 | 3.14  |  |
| AZTb                 | d4T    | ABCb   | 0.37        | 0.25 | 1.91 | 0.45               | 1.91 | 1.92 | 1.92  | 0.62               | 2.28 | 2.16 | 2.53  | 0.45                    | 2.84 | 2.41 | 3.26  |  |
| AZTt                 | d4T    | ABCb   | 0.39        | 0.25 | 1.91 | 0.47               | 1.91 | 1.92 | 1.92  | 0.64               | 2.31 | 2.16 | 2.56  | 0.47                    | 2.91 | 2.41 | 3.31  |  |
| d4T                  | TDF    | RAL    | 0.25        | 0.86 | 1.69 | 0.87               | 1.69 | 1.69 | 1.69  | 1.11               | 1.94 | 2.55 | 2.80  | 1.67                    | 2.00 | 2.71 | 3.63  |  |
| d4T                  | ddIb   | RAL    | 0.25        | 0.75 | 1.69 | 0.82               | 1.69 | 1.83 | 1.83  | 0.99               | 1.94 | 2.43 | 2.68  | 1.34                    | 2.00 | 2.38 | 3.12  |  |
| d4T                  | ddIb   | MVC    | 0.25        | 0.75 | 1.72 | 0.82               | 1.73 | 1.83 | 1.83  | 0.99               | 1.97 | 2.47 | 2.72  | 1.34                    | 1.95 | 2.54 | 3.13  |  |
| d4T                  | TDF    | MVC    | 0.25        | 0.86 | 1.72 | 0.87               | 1.73 | 1.73 | 1.73  | 1.11               | 1.97 | 2.58 | 2.83  | 1.67                    | 1.95 | 2.95 | 3.65  |  |
| AZTb                 | TDF    | RAL    | 0.37        | 0.86 | 1.69 | 0.87               | 1.69 | 1.69 | 1.69  | 1.23               | 2.05 | 2.55 | 2.91  | 1.92                    | 2.07 | 2.71 | 3.67  |  |
| d4T                  | ddIq   | RAL    | 0.25        | 0.84 | 1.69 | 0.90               | 1.69 | 1.85 | 1.85  | 1.09               | 1.94 | 2.53 | 2.77  | 1.45                    | 2.00 | 2.47 | 3.27  |  |
| ddIb                 | TDF    | EVG/c  | 0.75        | 0.86 | 1.41 | 1.06               | 1.60 | 1.43 | 1.61  | 1.61               | 2.16 | 2.27 | 3.02  | 1.03                    | 2.25 | 2.24 | 2.83  |  |
| AZTb                 | ddIb   | RAL    | 0.37        | 0.75 | 1.69 | 0.83               | 1.69 | 1.83 | 1.83  | 1.11               | 2.05 | 2.43 | 2.80  | 1.51                    | 2.07 | 2.38 | 3.11  |  |
| AZTt                 | TDF    | RAL    | 0.39        | 0.86 | 1.69 | 0.87               | 1.69 | 1.69 | 1.69  | 1.25               | 2.08 | 2.55 | 2.94  | 1.99                    | 2.10 | 2.71 | 3.73  |  |
| AZTt                 | ddIb   | RAL    | 0.39        | 0.75 | 1.69 | 0.84               | 1.69 | 1.83 | 1.83  | 1.14               | 2.08 | 2.43 | 2.83  | 1.55                    | 2.10 | 2.38 | 3.15  |  |
| d4T                  | ddIq   | MVC    | 0.25        | 0.84 | 1.72 | 0.90               | 1.73 | 1.85 | 1.85  | 1.09               | 1.97 | 2.56 | 2.81  | 1.45                    | 1.95 | 2.64 | 3.28  |  |
| d4T                  | ddIq   | MVC    | 0.25        | 0.84 | 1.72 | 0.90               | 1.73 | 1.85 | 1.85  | 1.09               | 1.97 | 2.56 | 2.81  | 1.45                    | 1.95 | 2.64 | 3.28  |  |
| AZTb                 | ddIb   | MVC    | 0.37        | 0.75 | 1.72 | 0.83               | 1.72 | 1.83 | 1.83  | 1.11               | 2.09 | 2.47 | 2.84  | 1.51                    | 2.06 | 2.54 | 3.19  |  |
| AZTb                 | TDF    | MVC    | 0.37        | 0.86 | 1.72 | 0.87               | 1.72 | 1.73 | 1.73  | 1.23               | 2.09 | 2.58 | 2.95  | 1.92                    | 2.06 | 2.95 | 3.77  |  |
| AZTt                 | ddIb   | MVC    | 0.39        | 0.75 | 1.72 | 0.84               | 1.72 | 1.83 | 1.83  | 1.14               | 2.12 | 2.47 | 2.86  | 1.55                    | 2.09 | 2.54 | 3.23  |  |
| AZTt                 | TDF    | MVC    | 0.39        | 0.86 | 1.72 | 0.87               | 1.72 | 1.73 | 1.73  | 1.25               | 2.12 | 2.58 | 2.97  | 1.99                    | 2.09 | 2.95 | 3.82  |  |
| ddIq                 | TDF    | EVG/c  | 0.84        | 0.86 | 1.41 | 1.10               | 1.62 | 1.43 | 1.62  | 1.70               | 2.25 | 2.27 | 3.11  | 1.07                    | 2.36 | 2.24 | 2.91  |  |
| AZTb                 | ddIq   | RAL    | 0.37        | 0.84 | 1.69 | 0.91               | 1.69 | 1.85 | 1.85  | 1.21               | 2.05 | 2.53 | 2.89  | 1.61                    | 2.07 | 2.47 | 3.24  |  |
| AZTb                 | d4T    | ENF    | 0.37        | 0.25 | 2.07 | 0.45               | 2.07 | 2.07 | 2.07  | 0.62               | 2.44 | 2.32 | 2.69  | 0.45                    | 2.51 | 2.33 | 2.74  |  |
| AZTt                 | ddIq   | RAL    | 0.39        | 0.84 | 1.69 | 0.92               | 1.69 | 1.85 | 1.85  | 1.23               | 2.08 | 2.53 | 2.92  | 1.66                    | 2.10 | 2.47 | 3.28  |  |
| AZTb                 | ddIq   | MVC    | 0.37        | 0.84 | 1.72 | 0.91               | 1.72 | 1.85 | 1.85  | 1.21               | 2.09 | 2.56 | 2.93  | 1.61                    | 2.06 | 2.64 | 3.32  |  |
| AZTt                 | d4T    | ENF    | 0.39        | 0.25 | 2.07 | 0.47               | 2.07 | 2.07 | 2.07  | 0.64               | 2.46 | 2.32 | 2.71  | 0.47                    | 2.54 | 2.33 | 2.76  |  |
| AZTt                 | ddIq   | MVC    | 0.39        | 0.84 | 1.72 | 0.92               | 1.72 | 1.85 | 1.85  | 1.23               | 2.12 | 2.56 | 2.95  | 1.66                    | 2.09 | 2.64 | 3.36  |  |
| AZTb                 | d4T    | ABCq   | 0.37        | 0.25 | 2.14 | 0.45               | 2.14 | 2.14 | 2.14  | 0.62               | 2.51 | 2.39 | 2.76  | 0.45                    | 3.07 | 2.64 | 3.49  |  |
| AZTt                 | d4T    | ABCq   | 0.39        | 0.25 | 2.14 | 0.47               | 2.14 | 2.14 | 2.14  | 0.64               | 2.54 | 2.39 | 2.78  | 0.47                    | 3.13 | 2.64 | 3.54  |  |
| d4T                  | TDF    | ABCb   | 0.25        | 0.86 | 1.91 | 0.87               | 1.92 | 1.92 | 1.92  | 1.11               | 2.16 | 2.77 | 3.02  | 1.67                    | 2.41 | 1.88 | 3.81  |  |
| d4T                  | ddIb   | ABCb   | 0.25        | 0.75 | 1.91 | 0.82               | 1.92 | 2.04 | 2.04  | 0.99               | 2.16 | 2.66 | 2.91  | 1.34                    | 2.41 | 2.17 | 3.40  |  |
| AZTb                 | TDF    | ABCb   | 0.37        | 0.86 | 1.91 | 0.87               | 1.91 | 1.92 | 1.92  | 1.23               | 2.28 | 2.77 | 3.14  | 1.92                    | 2.84 | 1.88 | 4.23  |  |
| d4T                  | ddIq   | ABCb   | 0.25        | 0.84 | 1.91 | 0.90               | 1.92 | 2.06 | 2.06  | 1.09               | 2.16 | 2.75 | 3.00  | 1.45                    | 2.41 | 2.20 | 3.56  |  |
| AZTb                 | ddIb   | ABCb   | 0.37        | 0.75 | 1.91 | 0.83               | 1.91 | 2.04 | 2.04  | 1.11               | 2.28 | 2.66 | 3.03  | 1.51                    | 2.84 | 2.17 | 3.72  |  |
| AZTt                 | TDF    | ABCb   | 0.39        | 0.86 | 1.91 | 0.87               | 1.91 | 1.92 | 1.92  | 1.25               | 2.31 | 2.77 | 3.17  | 1.99                    | 2.91 | 1.88 | 4.29  |  |
| AZTt                 | ddIb   | ABCb   | 0.39        | 0.75 | 1.91 | 0.84               | 1.91 | 2.04 | 2.04  | 1.14               | 2.31 | 2.66 | 3.05  | 1.55                    | 2.91 | 2.17 | 3.77  |  |
| ddIb                 | TDF    | RAL    | 0.75        | 0.86 | 1.69 | 1.06               | 1.83 | 1.69 | 1.83  | 1.61               | 2.43 | 2.55 | 3.29  | 1.03                    | 2.38 | 2.71 | 3.11  |  |
| ddIb                 | TDF    | MVC    | 0.75        | 0.86 | 1.72 | 1.06               | 1.83 | 1.73 | 1.83  | 1.61               | 2.47 | 2.58 | 3.33  | 1.03                    | 2.54 | 2.95 | 3.45  |  |
| AZTb                 | ddIq   | ABCb   | 0.37        | 0.84 | 1.91 | 0.91               | 1.91 | 2.06 | 2.06  | 1.21               | 2.28 | 2.75 | 3.12  | 1.61                    | 2.84 | 2.20 | 3.87  |  |
| AZTt                 | ddIq   | ABCb   | 0.39        | 0.84 | 1.91 | 0.92               | 1.91 | 2.06 | 2.06  | 1.23               | 2.31 | 2.75 | 3.15  | 1.66                    | 2.91 | 2.20 | 3.92  |  |
| AZTb                 | d4T    | 3TCb   | 0.37        | 0.25 | 2.30 | 0.45               | 2.30 | 2.31 | 2.31  | 0.62               | 2.67 | 2.55 | 2.92  | 0.45                    | 2.91 | 2.72 | 3.28  |  |
| d4T                  | EVG/c  | MVC    | 0.25        | 1.41 | 1.72 | 1.42               | 1.73 | 1.84 | 1.84  | 1.66               | 1.97 | 3.14 | 3.39  | 1.70                    | 1.95 | 3.20 | 3.44  |  |
| ddIq                 | TDF    | RAL    | 0.84        | 0.86 | 1.69 | 1.10               | 1.85 | 1.69 | 1.85  | 1.70               | 2.53 | 2.55 | 3.38  | 1.07                    | 2.47 | 2.71 | 3.19  |  |

| Regimen <sup>a</sup> |        |        | HIV <sup>ave</sup> |      |      |                    |      |      |       |                    |      |      |       |                       |      |      |       |
|----------------------|--------|--------|--------------------|------|------|--------------------|------|------|-------|--------------------|------|------|-------|-----------------------|------|------|-------|
|                      |        |        | Single drug        |      |      | Loewe <sup>b</sup> |      |      |       | Bliss <sup>c</sup> |      |      |       | DI Index <sup>d</sup> |      |      |       |
| Drug 1               | Drug 2 | Drug 3 | 1                  | 2    | 3    | 1,2                | 1,3  | 2,3  | 1,2,3 | 1,2                | 1,3  | 2,3  | 1,2,3 | 1,2                   | 1,3  | 2,3  | 1,2,3 |
| AZTt                 | d4T    | 3TCb   | 0.39               | 0.25 | 2.30 | 0.47               | 2.30 | 2.31 | 2.31  | 0.64               | 2.70 | 2.55 | 2.95  | 0.47                  | 2.95 | 2.72 | 3.32  |
| d4T                  | TDF    | ENF    | 0.25               | 0.86 | 2.07 | 0.87               | 2.07 | 2.08 | 2.08  | 1.11               | 2.32 | 2.93 | 3.18  | 1.67                  | 2.33 | 2.62 | 3.67  |
| ddlq                 | TDF    | MVC    | 0.84               | 0.86 | 1.72 | 1.10               | 1.85 | 1.73 | 1.85  | 1.70               | 2.56 | 2.58 | 3.42  | 1.07                  | 2.64 | 2.95 | 3.54  |
| d4T                  | ddlq   | ENF    | 0.25               | 0.75 | 2.07 | 0.82               | 2.07 | 2.24 | 2.24  | 0.99               | 2.32 | 2.82 | 3.07  | 1.34                  | 2.33 | 2.71 | 3.36  |
| AZTb                 | d4T    | 3TCq   | 0.37               | 0.25 | 2.35 | 0.45               | 2.35 | 2.35 | 2.35  | 0.62               | 2.72 | 2.60 | 2.97  | 0.45                  | 2.95 | 2.77 | 3.33  |
| AZTt                 | d4T    | 3TCq   | 0.39               | 0.25 | 2.35 | 0.47               | 2.35 | 2.35 | 2.35  | 0.64               | 2.74 | 2.60 | 2.99  | 0.47                  | 2.99 | 2.77 | 3.36  |
| AZTb                 | EVG/c  | MVC    | 0.37               | 1.41 | 1.72 | 1.42               | 1.72 | 1.84 | 1.84  | 1.78               | 2.09 | 3.14 | 3.51  | 1.84                  | 2.06 | 3.20 | 3.58  |
| AZTb                 | TDF    | ENF    | 0.37               | 0.86 | 2.07 | 0.87               | 2.07 | 2.08 | 2.08  | 1.23               | 2.44 | 2.93 | 3.30  | 1.92                  | 2.51 | 2.62 | 3.83  |
| AZTt                 | EVG/c  | MVC    | 0.39               | 1.41 | 1.72 | 1.42               | 1.72 | 1.84 | 1.84  | 1.81               | 2.12 | 3.14 | 3.53  | 1.87                  | 2.09 | 3.20 | 3.60  |
| d4T                  | ddlq   | ABCq   | 0.25               | 0.75 | 2.14 | 0.82               | 2.14 | 2.24 | 2.24  | 0.99               | 2.39 | 2.89 | 3.14  | 1.34                  | 2.64 | 2.38 | 3.62  |
| d4T                  | TDF    | ABCq   | 0.25               | 0.86 | 2.14 | 0.87               | 2.14 | 2.14 | 2.14  | 1.11               | 2.39 | 3.00 | 3.25  | 1.67                  | 2.64 | 2.11 | 3.98  |
| AZTt                 | TDF    | ENF    | 0.39               | 0.86 | 2.07 | 0.87               | 2.07 | 2.08 | 2.08  | 1.25               | 2.46 | 2.93 | 3.32  | 1.99                  | 2.54 | 2.62 | 3.89  |
| d4T                  | ddlq   | ENF    | 0.25               | 0.84 | 2.07 | 0.90               | 2.07 | 2.26 | 2.26  | 1.09               | 2.32 | 2.91 | 3.16  | 1.45                  | 2.33 | 2.79 | 3.50  |
| AZTb                 | ddlq   | ENF    | 0.37               | 0.75 | 2.07 | 0.83               | 2.07 | 2.24 | 2.24  | 1.11               | 2.44 | 2.82 | 3.18  | 1.51                  | 2.51 | 2.71 | 3.46  |
| AZTt                 | ddlq   | ENF    | 0.39               | 0.75 | 2.07 | 0.84               | 2.07 | 2.24 | 2.24  | 1.14               | 2.46 | 2.82 | 3.21  | 1.55                  | 2.54 | 2.71 | 3.50  |
| d4T                  | ddlq   | ABCq   | 0.25               | 0.84 | 2.14 | 0.90               | 2.14 | 2.25 | 2.26  | 1.09               | 2.39 | 2.98 | 3.23  | 1.45                  | 2.64 | 2.40 | 3.77  |
| AZTb                 | ddlq   | ABCq   | 0.37               | 0.75 | 2.14 | 0.83               | 2.14 | 2.24 | 2.24  | 1.11               | 2.51 | 2.89 | 3.26  | 1.51                  | 3.07 | 2.38 | 3.95  |
| AZTb                 | TDF    | ABCq   | 0.37               | 0.86 | 2.14 | 0.87               | 2.14 | 2.14 | 2.14  | 1.23               | 2.51 | 3.00 | 3.37  | 1.92                  | 3.07 | 2.11 | 4.40  |
| AZTt                 | ddlq   | ABCq   | 0.39               | 0.75 | 2.14 | 0.84               | 2.14 | 2.24 | 2.24  | 1.14               | 2.54 | 2.89 | 3.28  | 1.55                  | 3.13 | 2.38 | 4.00  |
| AZTb                 | ddlq   | ENF    | 0.37               | 0.84 | 2.07 | 0.91               | 2.07 | 2.26 | 2.26  | 1.21               | 2.44 | 2.91 | 3.28  | 1.61                  | 2.51 | 2.79 | 3.59  |
| AZTt                 | TDF    | ABCq   | 0.39               | 0.86 | 2.14 | 0.87               | 2.14 | 2.14 | 2.14  | 1.25               | 2.54 | 3.00 | 3.39  | 1.99                  | 3.13 | 2.11 | 4.47  |
| AZTt                 | ddlq   | ENF    | 0.39               | 0.84 | 2.07 | 0.92               | 2.07 | 2.26 | 2.26  | 1.23               | 2.46 | 2.91 | 3.30  | 1.66                  | 2.54 | 2.79 | 3.63  |
| ddlq                 | TDF    | ABCb   | 0.75               | 0.86 | 1.91 | 1.06               | 2.04 | 1.92 | 2.04  | 1.61               | 2.66 | 2.77 | 3.52  | 1.03                  | 2.17 | 1.88 | 2.14  |
| d4T                  | ABCb   | EVG/c  | 0.25               | 1.91 | 1.41 | 1.92               | 1.42 | 2.02 | 2.02  | 2.16               | 1.66 | 3.33 | 3.58  | 2.42                  | 1.69 | 3.39 | 4.18  |
| d4T                  | RAL    | MVC    | 0.25               | 1.69 | 1.72 | 1.69               | 1.73 | 1.94 | 1.94  | 1.94               | 1.97 | 3.41 | 3.66  | 2.01                  | 1.95 | 3.94 | 4.06  |
| AZTb                 | ddlq   | ABCq   | 0.37               | 0.84 | 2.14 | 0.91               | 2.14 | 2.25 | 2.25  | 1.21               | 2.51 | 2.98 | 3.35  | 1.61                  | 3.07 | 2.40 | 4.10  |
| AZTt                 | ddlq   | ABCq   | 0.39               | 0.84 | 2.14 | 0.92               | 2.14 | 2.25 | 2.25  | 1.23               | 2.54 | 2.98 | 3.37  | 1.66                  | 3.13 | 2.40 | 4.15  |
| ddlq                 | TDF    | ABCb   | 0.84               | 0.86 | 1.91 | 1.10               | 2.06 | 1.92 | 2.06  | 1.70               | 2.75 | 2.77 | 3.61  | 1.07                  | 2.20 | 1.88 | 2.16  |
| d4T                  | 3TCb   | ddlq   | 0.25               | 2.30 | 0.75 | 2.31               | 0.82 | 2.39 | 2.40  | 2.55               | 0.99 | 3.05 | 3.30  | 2.72                  | 1.32 | 2.55 | 3.64  |
| AZTb                 | ABCb   | EVG/c  | 0.37               | 1.91 | 1.41 | 1.91               | 1.42 | 2.02 | 2.02  | 2.28               | 1.78 | 3.33 | 3.70  | 2.84                  | 1.83 | 3.39 | 4.68  |
| d4T                  | 3TCb   | TDF    | 0.25               | 2.30 | 0.86 | 2.31               | 0.87 | 2.30 | 2.31  | 2.55               | 1.11 | 3.16 | 3.41  | 2.72                  | 1.65 | 2.97 | 4.15  |
| AZTb                 | RAL    | MVC    | 0.37               | 1.69 | 1.72 | 1.69               | 1.72 | 1.94 | 1.94  | 2.05               | 2.09 | 3.41 | 3.78  | 2.08                  | 2.06 | 3.94 | 4.10  |
| AZTb                 | RAL    | MVC    | 0.37               | 1.69 | 1.72 | 1.69               | 1.72 | 1.94 | 1.94  | 2.05               | 2.09 | 3.41 | 3.78  | 2.08                  | 2.06 | 3.94 | 4.10  |
| AZTb                 | d4T    | ddlq   | 0.37               | 0.25 | 2.56 | 0.45               | 2.56 | 2.56 | 2.56  | 0.62               | 2.93 | 2.81 | 3.18  | 0.45                  | 3.40 | 3.29 | 4.11  |
| AZTt                 | ABCb   | EVG/c  | 0.39               | 1.91 | 1.41 | 1.91               | 1.42 | 2.02 | 2.02  | 2.31               | 1.81 | 3.33 | 3.72  | 2.91                  | 1.86 | 3.39 | 4.73  |
| AZTt                 | RAL    | MVC    | 0.39               | 1.69 | 1.72 | 1.69               | 1.72 | 1.94 | 1.94  | 2.08               | 2.12 | 3.41 | 3.80  | 2.11                  | 2.09 | 3.94 | 4.13  |
| AZTt                 | d4T    | ddlq   | 0.39               | 0.25 | 2.56 | 0.47               | 2.56 | 2.56 | 2.56  | 0.64               | 2.95 | 2.81 | 3.20  | 0.47                  | 3.46 | 3.29 | 4.16  |
| d4T                  | 3TCq   | ddlq   | 0.25               | 2.35 | 0.75 | 2.35               | 0.82 | 2.44 | 2.44  | 2.60               | 0.99 | 3.10 | 3.34  | 2.77                  | 1.32 | 2.59 | 3.68  |
| d4T                  | 3TCb   | ddlq   | 0.25               | 2.30 | 0.84 | 2.31               | 0.90 | 2.41 | 2.41  | 2.55               | 1.09 | 3.14 | 3.39  | 2.72                  | 1.43 | 2.58 | 3.79  |
| d4T                  | 3TCq   | TDF    | 0.25               | 2.35 | 0.86 | 2.35               | 0.87 | 2.35 | 2.35  | 2.60               | 1.11 | 3.21 | 3.46  | 2.77                  | 1.65 | 3.02 | 4.19  |
| AZTb                 | 3TCb   | ddlq   | 0.37               | 2.30 | 0.75 | 2.30               | 0.83 | 2.39 | 2.39  | 2.67               | 1.11 | 3.05 | 3.42  | 2.91                  | 1.50 | 2.55 | 3.69  |
| ddlq                 | EVG/c  | MVC    | 0.75               | 1.41 | 1.72 | 1.60               | 1.83 | 1.84 | 1.94  | 2.16               | 2.47 | 3.14 | 3.88  | 2.25                  | 2.54 | 3.20 | 4.09  |
| AZTb                 | 3TCb   | TDF    | 0.37               | 2.30 | 0.86 | 2.30               | 0.87 | 2.30 | 2.30  | 2.67               | 1.23 | 3.16 | 3.53  | 2.91                  | 1.91 | 2.97 | 4.27  |
| AZTt                 | 3TCb   | ddlq   | 0.39               | 2.30 | 0.75 | 2.30               | 0.84 | 2.39 | 2.39  | 2.70               | 1.14 | 3.05 | 3.44  | 2.95                  | 1.54 | 2.55 | 3.73  |
| TDF                  | EVG/c  | MVC    | 0.86               | 1.41 | 1.72 | 1.43               | 1.73 | 1.84 | 1.84  | 2.27               | 2.58 | 3.14 | 4.00  | 2.25                  | 2.95 | 3.20 | 4.35  |
| AZTt                 | 3TCb   | TDF    | 0.39               | 2.30 | 0.86 | 2.30               | 0.87 | 2.30 | 2.30  | 2.70               | 1.25 | 3.16 | 3.56  | 2.95                  | 1.98 | 2.97 | 4.32  |
| d4T                  | 3TCq   | ddlq   | 0.25               | 2.35 | 0.84 | 2.35               | 0.90 | 2.45 | 2.45  | 2.60               | 1.09 | 3.19 | 3.44  | 2.77                  | 1.43 | 2.62 | 3.83  |
| AZTb                 | 3TCq   | ddlq   | 0.37               | 2.35 | 0.75 | 2.35               | 0.83 | 2.44 | 2.44  | 2.72               | 1.11 | 3.10 | 3.46  | 2.95                  | 1.50 | 2.59 | 3.74  |
| ddlq                 | TDF    | ENF    | 0.75               | 0.86 | 2.07 | 1.06               | 2.24 | 2.08 | 2.24  | 1.61               | 2.82 | 2.93 | 3.68  | 1.03                  | 2.71 | 2.62 | 3.12  |
| AZTb                 | 3TCb   | ddlq   | 0.37               | 2.30 | 0.84 | 2.30               | 0.91 | 2.41 | 2.41  | 2.67               | 1.21 | 3.14 | 3.51  | 2.91                  | 1.60 | 2.58 | 3.82  |
| AZTt                 | 3TCq   | ddlq   | 0.39               | 2.35 | 0.75 | 2.35               | 0.84 | 2.44 | 2.44  | 2.74               | 1.14 | 3.10 | 3.49  | 2.99                  | 1.54 | 2.59 | 3.77  |
| AZTb                 | 3TCq   | TDF    | 0.37               | 2.35 | 0.86 | 2.35               | 0.87 | 2.35 | 2.35  | 2.72               | 1.23 | 3.21 | 3.58  | 2.95                  | 1.91 | 3.02 | 4.31  |
| d4T                  | ENF    | EVG/c  | 0.25               | 2.07 | 1.41 | 2.07               | 1.42 | 2.20 | 2.20  | 2.32               | 1.66 | 3.48 | 3.73  | 2.34                  | 1.69 | 3.46 | 3.81  |
| ddlq                 | EVG/c  | MVC    | 0.84               | 1.41 | 1.72 | 1.62               | 1.85 | 1.84 | 1.96  | 2.25               | 2.56 | 3.14 | 3.98  | 2.36                  | 2.64 | 3.20 | 4.19  |
| AZTt                 | 3TCb   | ddlq   | 0.39               | 2.30 | 0.84 | 2.30               | 0.92 | 2.41 | 2.41  | 2.70               | 1.23 | 3.14 | 3.54  | 2.95                  | 1.64 | 2.58 | 3.86  |
| AZTt                 | 3TCq   | TDF    | 0.39               | 2.35 | 0.86 | 2.35               | 0.87 | 2.35 | 2.35  | 2.74               | 1.25 | 3.21 | 3.60  | 2.99                  | 1.98 | 3.02 | 4.36  |
| d4T                  | ABCb   | RAL    | 0.25               | 1.91 | 1.69 | 1.92               | 1.69 | 2.10 | 2.11  | 2.16               | 1.94 | 3.60 | 3.85  | 2.42                  | 2.00 | 3.45 | 4.45  |
| d4T                  | ABCb   | MVC    | 0.25               | 1.91 | 1.72 | 1.92               | 1.73 | 2.07 | 2.08  | 2.16               | 1.97 | 3.64 | 3.89  | 2.42                  | 1.95 | 4.16 | 4.67  |
| ddlq                 | TDF    | ABCq   | 0.75               | 0.86 | 2.14 | 1.06               | 2.24 | 2.14 | 2.24  | 1.61               | 2.89 | 3.00 | 3.75  | 1.03                  | 2.38 | 2.11 | 2.34  |
| AZTb                 | 3TCq   | ddlq   | 0.37               | 2.35 | 0.84 | 2.35               | 0.91 | 2.45 | 2.45  | 2.72               | 1.21 | 3.19 | 3.56  | 2.95                  | 1.60 | 2.62 | 3.86  |
| d4T                  | ABCq   | EVG/c  | 0.25               | 2.14 | 1.41 | 2.14               | 1.42 | 2.20 | 2.20  | 2.39               | 1.66 | 3.56 | 3.81  | 2.65                  | 1.69 | 3.62 | 4.44  |
| ddlq                 | TDF    | ENF    | 0.84               | 0.86 | 2.07 | 1.10               | 2.26 | 2.08 | 2.26  | 1.70               | 2.91 | 2.93 | 3.77  | 1.07                  | 2.79 | 2.62 | 3.18  |
| AZTt                 | 3TCq   | ddlq   | 0.39               | 2.35 | 0.84 | 2.35               | 0.92 | 2.45 | 2.45  | 2.74               | 1.23 | 3.19 | 3.58  | 2.99                  | 1.64 | 2.62 | 3.90  |
| AZTb                 | ENF    | EVG/c  | 0.37               | 2.07 | 1.41 | 2.07               | 1.42 | 2.20 | 2.20  | 2.44               | 1.78 | 3.48 | 3.85  | 2.51                  | 1.83 | 3.46 | 4.00  |
| AZTb                 | ABCb   | RAL    | 0.37               | 1.91 | 1.69 | 1.91               | 1.69 | 2.10 | 2.10  | 2.28               | 2.05 | 3.60 | 3.97  | 2.84                  | 2.07 | 3.45 | 4.89  |
| AZTt                 | ENF    | EVG/c  | 0.39               | 2.07 | 1.41 | 2.07               | 1.42 | 2.20 | 2.20  | 2.46               | 1.81 | 3.48 | 3.88  | 2.54                  | 1.86 | 3.46 | 4.03  |
| AZTb                 | ABCb   | MVC    | 0.37               | 1.91 | 1.72 | 1.91               | 1.72 | 2.07 | 2.07  | 2.28               | 2.09 | 3.64 | 4.00  | 2.84                  | 2.06 | 4.16 | 5.20  |
| AZTb                 | ABCb   | MVC    | 0.37               | 1.91 | 1.72 | 1.91               | 1.72 | 2.07 | 2.07  | 2.28               | 2.09 | 3.64 | 4.00  | 2.84                  | 2.06 | 4.16 | 5.20  |
| ddlq                 | TDF    | ABCq   | 0.84               | 0.86 | 2.14 | 1.10               | 2.25 | 2.14 | 2.25  | 1.70               | 2.98 | 3.00 | 3.84  | 1.07                  | 2.40 | 2.11 | 2.36  |
| AZTt                 | ABCb   | RAL    | 0.39               | 1.91 | 1.69 | 1.91               | 1.69 | 2.10 | 2.10  | 2.31               | 2.08 | 3.60 | 3.99  | 2.91                  | 2.10 | 3.45 | 4.94  |

| Regimen <sup>a</sup> |        |        | <i>HP</i> <sub>ave</sub> |      |      |                    |      |      |       |                    |      |      |       |                              |      |      |       |
|----------------------|--------|--------|--------------------------|------|------|--------------------|------|------|-------|--------------------|------|------|-------|------------------------------|------|------|-------|
|                      |        |        | Single drug              |      |      | Loewe <sup>b</sup> |      |      |       | Bliss <sup>c</sup> |      |      |       | <i>DI</i> Index <sup>d</sup> |      |      |       |
| Drug 1               | Drug 2 | Drug 3 | 1                        | 2    | 3    | 1,2                | 1,3  | 2,3  | 1,2,3 | 1,2                | 1,3  | 2,3  | 1,2,3 | 1,2                          | 1,3  | 2,3  | 1,2,3 |
| AZTt                 | ABCb   | MVC    | 0.39                     | 1.91 | 1.72 | 1.91               | 1.72 | 2.07 | 2.07  | 2.31               | 2.12 | 3.64 | 4.03  | 2.91                         | 2.09 | 4.16 | 5.24  |
| AZTb                 | ABCq   | EVG/c  | 0.37                     | 2.14 | 1.41 | 2.14               | 1.42 | 2.20 | 2.20  | 2.51               | 1.78 | 3.56 | 3.93  | 3.07                         | 1.83 | 3.62 | 4.96  |
| AZTb                 | d4T    | NFVt   | 0.37                     | 0.25 | 2.76 | 0.45               | 2.76 | 2.76 | 2.76  | 0.62               | 3.12 | 3.01 | 3.37  | 0.45                         | 3.20 | 2.92 | 3.31  |
| AZTt                 | ABCq   | EVG/c  | 0.39                     | 2.14 | 1.41 | 2.14               | 1.42 | 2.20 | 2.20  | 2.54               | 1.81 | 3.56 | 3.95  | 3.13                         | 1.86 | 3.62 | 5.01  |
| AZTt                 | d4T    | NFVt   | 0.39                     | 0.25 | 2.76 | 0.47               | 2.76 | 2.76 | 2.76  | 0.64               | 3.15 | 3.01 | 3.40  | 0.47                         | 3.23 | 2.92 | 3.34  |
| ddlB                 | RAL    | MVC    | 0.75                     | 1.69 | 1.72 | 1.83               | 1.83 | 1.94 | 2.03  | 2.43               | 2.47 | 3.41 | 4.16  | 2.38                         | 2.54 | 3.94 | 4.52  |
| AZTb                 | d4T    | FTC    | 0.37                     | 0.25 | 2.79 | 0.45               | 2.79 | 2.79 | 2.79  | 0.62               | 3.16 | 3.04 | 3.41  | 0.45                         | 3.55 | 3.21 | 3.91  |
| ddlB                 | ABCb   | EVG/c  | 0.75                     | 1.91 | 1.41 | 2.04               | 1.60 | 2.02 | 2.13  | 2.66               | 2.16 | 3.33 | 4.07  | 2.17                         | 2.25 | 3.39 | 3.78  |
| TDF                  | ABCb   | EVG/c  | 0.86                     | 1.91 | 1.41 | 1.92               | 1.43 | 2.02 | 2.02  | 2.77               | 2.27 | 3.33 | 4.19  | 1.89                         | 2.24 | 3.39 | 3.65  |
| TDF                  | RAL    | MVC    | 0.86                     | 1.69 | 1.72 | 1.69               | 1.73 | 1.94 | 1.94  | 2.55               | 2.58 | 3.41 | 4.27  | 2.71                         | 2.95 | 3.94 | 5.04  |
| AZTb                 | d4T    | NFVb   | 0.37                     | 0.25 | 2.80 | 0.45               | 2.80 | 2.80 | 2.80  | 0.62               | 3.17 | 3.05 | 3.42  | 0.45                         | 3.25 | 2.96 | 3.36  |
| AZTt                 | d4T    | FTC    | 0.39                     | 0.25 | 2.79 | 0.47               | 2.79 | 2.79 | 2.79  | 0.64               | 3.18 | 3.04 | 3.43  | 0.47                         | 3.60 | 3.21 | 3.95  |
| d4T                  | ddIEC  | TDF    | 0.25                     | 2.56 | 0.86 | 2.56               | 0.87 | 2.56 | 2.56  | 2.81               | 1.11 | 3.42 | 3.67  | 3.29                         | 1.65 | 2.51 | 4.76  |
| AZTt                 | d4T    | NFVb   | 0.39                     | 0.25 | 2.80 | 0.47               | 2.80 | 2.80 | 2.80  | 0.64               | 3.19 | 3.05 | 3.44  | 0.47                         | 3.28 | 2.96 | 3.38  |
| d4T                  | ENF    | RAL    | 0.25                     | 2.07 | 1.69 | 2.07               | 1.69 | 2.29 | 2.29  | 2.32               | 1.94 | 3.76 | 4.01  | 2.34                         | 2.00 | 3.96 | 4.28  |
| ddlq                 | RAL    | MVC    | 0.84                     | 1.69 | 1.72 | 1.85               | 1.85 | 1.94 | 2.05  | 2.53               | 2.56 | 3.41 | 4.25  | 2.47                         | 2.64 | 3.94 | 4.62  |
| d4T                  | ENF    | MVC    | 0.25                     | 2.07 | 1.72 | 2.07               | 1.73 | 2.26 | 2.26  | 2.32               | 1.97 | 3.79 | 4.04  | 2.34                         | 1.95 | 4.70 | 4.60  |
| 3TCb                 | ddlB   | TDF    | 2.30                     | 0.75 | 0.86 | 2.39               | 2.30 | 1.06 | 2.39  | 3.05               | 3.16 | 1.61 | 3.91  | 2.55                         | 2.97 | 0.98 | 3.06  |
| ddlq                 | ABCb   | EVG/c  | 0.84                     | 1.91 | 1.41 | 2.06               | 1.62 | 2.02 | 2.14  | 2.75               | 2.25 | 3.33 | 4.17  | 2.20                         | 2.36 | 3.39 | 3.86  |
| d4T                  | 3TCb   | EVG/c  | 0.25                     | 2.30 | 1.41 | 2.31               | 1.42 | 2.35 | 2.35  | 2.55               | 1.66 | 3.72 | 3.97  | 2.72                         | 1.69 | 4.06 | 4.56  |
| d4T                  | ABCq   | RAL    | 0.25                     | 2.14 | 1.69 | 2.14               | 1.69 | 2.26 | 2.26  | 2.39               | 1.94 | 3.83 | 4.08  | 2.65                         | 2.00 | 3.68 | 4.72  |
| AZTb                 | ddIEC  | TDF    | 0.37                     | 2.56 | 0.86 | 2.56               | 0.87 | 2.56 | 2.56  | 2.93               | 1.23 | 3.42 | 3.79  | 3.41                         | 1.91 | 2.51 | 4.61  |
| d4T                  | ABCq   | MVC    | 0.25                     | 2.14 | 1.72 | 2.14               | 1.73 | 2.23 | 2.23  | 2.39               | 1.97 | 3.87 | 4.11  | 2.65                         | 1.95 | 4.41 | 4.95  |
| AZTt                 | ddIEC  | TDF    | 0.39                     | 2.56 | 0.86 | 2.56               | 0.87 | 2.56 | 2.56  | 2.95               | 1.25 | 3.42 | 3.81  | 3.46                         | 1.98 | 2.51 | 4.67  |
| 3TCq                 | ddlB   | TDF    | 2.35                     | 0.75 | 0.86 | 2.44               | 2.35 | 1.06 | 2.44  | 3.10               | 3.21 | 1.61 | 3.95  | 2.59                         | 3.02 | 0.98 | 3.11  |
| d4T                  | 3TCq   | EVG/c  | 0.25                     | 2.35 | 1.41 | 2.35               | 1.42 | 2.39 | 2.39  | 2.60               | 1.66 | 3.76 | 4.01  | 2.77                         | 1.69 | 4.10 | 4.61  |
| 3TCb                 | ddlq   | TDF    | 2.30                     | 0.84 | 0.86 | 2.41               | 2.30 | 1.10 | 2.41  | 3.14               | 3.16 | 1.70 | 4.00  | 2.58                         | 2.97 | 1.03 | 3.10  |
| AZTb                 | ENF    | RAL    | 0.37                     | 2.07 | 1.69 | 2.07               | 1.69 | 2.29 | 2.29  | 2.44               | 2.05 | 3.76 | 4.13  | 2.51                         | 2.07 | 3.96 | 4.38  |
| AZTb                 | ENF    | MVC    | 0.37                     | 2.07 | 1.72 | 2.07               | 1.72 | 2.26 | 2.26  | 2.44               | 2.09 | 3.79 | 4.16  | 2.51                         | 2.06 | 4.70 | 4.81  |
| AZTb                 | 3TCb   | EVG/c  | 0.37                     | 2.30 | 1.41 | 2.30               | 1.42 | 2.35 | 2.35  | 2.67               | 1.78 | 3.72 | 4.09  | 2.91                         | 1.83 | 4.06 | 4.71  |
| AZTt                 | ENF    | RAL    | 0.39                     | 2.07 | 1.69 | 2.07               | 1.69 | 2.29 | 2.29  | 2.46               | 2.08 | 3.76 | 4.15  | 2.54                         | 2.10 | 3.96 | 4.41  |
| AZTt                 | ENF    | MVC    | 0.39                     | 2.07 | 1.72 | 2.07               | 1.72 | 2.26 | 2.26  | 2.46               | 2.12 | 3.79 | 4.19  | 2.54                         | 2.09 | 4.70 | 4.84  |
| AZTt                 | 3TCb   | EVG/c  | 0.39                     | 2.30 | 1.41 | 2.30               | 1.42 | 2.35 | 2.35  | 2.70               | 1.81 | 3.72 | 4.11  | 2.95                         | 1.86 | 4.06 | 4.74  |
| AZTb                 | ABCq   | RAL    | 0.37                     | 2.14 | 1.69 | 2.14               | 1.69 | 2.26 | 2.26  | 2.51               | 2.05 | 3.83 | 4.20  | 3.07                         | 2.07 | 3.68 | 5.17  |
| AZTb                 | ABCq   | MVC    | 0.37                     | 2.14 | 1.72 | 2.14               | 1.72 | 2.23 | 2.23  | 2.51               | 2.09 | 3.87 | 4.23  | 3.07                         | 2.06 | 4.41 | 5.49  |
| AZTt                 | ABCq   | RAL    | 0.39                     | 2.14 | 1.69 | 2.14               | 1.69 | 2.26 | 2.26  | 2.54               | 2.08 | 3.83 | 4.22  | 3.13                         | 2.10 | 3.68 | 5.22  |
| AZTt                 | ABCq   | MVC    | 0.39                     | 2.14 | 1.72 | 2.14               | 1.72 | 2.23 | 2.23  | 2.54               | 2.12 | 3.87 | 4.26  | 3.13                         | 2.09 | 4.41 | 5.54  |
| 3TCq                 | ddlq   | TDF    | 2.35                     | 0.84 | 0.86 | 2.45               | 2.35 | 1.10 | 2.45  | 3.19               | 3.21 | 1.70 | 4.05  | 2.62                         | 3.02 | 1.03 | 3.14  |
| AZTb                 | 3TCq   | EVG/c  | 0.37                     | 2.35 | 1.41 | 2.35               | 1.42 | 2.39 | 2.39  | 2.72               | 1.78 | 3.76 | 4.13  | 2.95                         | 1.83 | 4.10 | 4.76  |
| AZTt                 | 3TCq   | EVG/c  | 0.39                     | 2.35 | 1.41 | 2.35               | 1.42 | 2.39 | 2.39  | 2.74               | 1.81 | 3.76 | 4.16  | 2.99                         | 1.86 | 4.10 | 4.79  |
| TDF                  | ENF    | EVG/c  | 0.86                     | 2.07 | 1.41 | 2.08               | 1.43 | 2.20 | 2.20  | 2.93               | 2.27 | 3.48 | 4.34  | 2.63                         | 2.24 | 3.46 | 4.07  |
| ddlB                 | ABCb   | RAL    | 0.75                     | 1.91 | 1.69 | 2.04               | 1.83 | 2.10 | 2.20  | 2.66               | 2.43 | 3.60 | 4.35  | 2.17                         | 2.38 | 3.45 | 3.74  |
| ddlB                 | ABCb   | MVC    | 0.75                     | 1.91 | 1.72 | 2.04               | 1.83 | 2.07 | 2.17  | 2.66               | 2.47 | 3.64 | 4.38  | 2.17                         | 2.54 | 4.16 | 4.38  |
| ddlB                 | ENF    | EVG/c  | 0.75                     | 2.07 | 1.41 | 2.24               | 1.60 | 2.20 | 2.33  | 2.82               | 2.16 | 3.48 | 4.23  | 2.71                         | 2.25 | 3.46 | 4.19  |
| TDF                  | ABCb   | RAL    | 0.86                     | 1.91 | 1.69 | 1.92               | 1.69 | 2.10 | 2.10  | 2.77               | 2.55 | 3.60 | 4.46  | 1.89                         | 2.71 | 3.45 | 3.94  |
| TDF                  | ABCb   | MVC    | 0.86                     | 1.91 | 1.72 | 1.92               | 1.73 | 2.07 | 2.07  | 2.77               | 2.58 | 3.64 | 4.50  | 1.89                         | 2.95 | 4.16 | 4.69  |
| ddlB                 | ABCq   | EVG/c  | 0.75                     | 2.14 | 1.41 | 2.24               | 1.60 | 2.20 | 2.29  | 2.89               | 2.16 | 3.56 | 4.30  | 2.38                         | 2.25 | 3.62 | 3.98  |
| TDF                  | ABCq   | EVG/c  | 0.86                     | 2.14 | 1.41 | 2.14               | 1.43 | 2.20 | 2.20  | 3.00               | 2.27 | 3.56 | 4.42  | 2.11                         | 2.24 | 3.62 | 3.84  |
| d4T                  | TDF    | NFVt   | 0.25                     | 0.86 | 2.76 | 0.87               | 2.76 | 2.76 | 2.76  | 1.11               | 3.01 | 3.62 | 3.87  | 1.67                         | 2.92 | 3.16 | 4.02  |
| d4T                  | FTC    | ddlB   | 0.25                     | 2.79 | 0.75 | 2.79               | 0.82 | 2.85 | 2.85  | 3.04               | 0.99 | 3.54 | 3.79  | 3.21                         | 1.32 | 3.06 | 4.12  |
| d4T                  | 3TCb   | RAL    | 0.25                     | 2.30 | 1.69 | 2.31               | 1.69 | 2.39 | 2.40  | 2.55               | 1.94 | 3.99 | 4.24  | 2.72                         | 2.00 | 4.00 | 4.76  |
| d4T                  | 3TCb   | MVC    | 0.25                     | 2.30 | 1.72 | 2.31               | 1.73 | 2.36 | 2.36  | 2.55               | 1.97 | 4.03 | 4.28  | 2.72                         | 1.95 | 5.28 | 5.36  |
| d4T                  | ABCb   | ENF    | 0.25                     | 1.91 | 2.07 | 1.92               | 2.07 | 2.41 | 2.41  | 2.16               | 2.32 | 3.98 | 4.23  | 2.42                         | 2.33 | 3.61 | 4.62  |
| ddlq                 | ABCb   | RAL    | 0.84                     | 1.91 | 1.69 | 2.06               | 1.85 | 2.10 | 2.22  | 2.75               | 2.53 | 3.60 | 4.44  | 2.20                         | 2.47 | 3.45 | 3.81  |
| ddlq                 | ABCb   | MVC    | 0.84                     | 1.91 | 1.72 | 2.06               | 1.85 | 2.07 | 2.18  | 2.75               | 2.56 | 3.64 | 4.48  | 2.20                         | 2.64 | 4.16 | 4.46  |
| ddlq                 | ENF    | EVG/c  | 0.84                     | 2.07 | 1.41 | 2.26               | 1.62 | 2.20 | 2.34  | 2.91               | 2.25 | 3.48 | 4.32  | 2.79                         | 2.36 | 3.46 | 4.29  |
| d4T                  | ddlB   | NFVt   | 0.25                     | 0.75 | 2.76 | 0.82               | 2.76 | 2.92 | 2.92  | 0.99               | 3.01 | 3.50 | 3.75  | 1.34                         | 2.92 | 3.29 | 3.80  |
| d4T                  | FTC    | TDF    | 0.25                     | 2.79 | 0.86 | 2.79               | 0.87 | 2.79 | 2.79  | 3.04               | 1.11 | 3.65 | 3.90  | 3.21                         | 1.65 | 3.07 | 4.43  |
| ddlq                 | ABCq   | EVG/c  | 0.84                     | 2.14 | 1.41 | 2.25               | 1.62 | 2.20 | 2.30  | 2.98               | 2.25 | 3.56 | 4.40  | 2.41                         | 2.36 | 3.62 | 4.06  |
| d4T                  | TDF    | NFVb   | 0.25                     | 0.86 | 2.80 | 0.87               | 2.80 | 2.80 | 2.80  | 1.11               | 3.05 | 3.66 | 3.91  | 1.67                         | 2.96 | 3.20 | 4.05  |
| d4T                  | 3TCq   | RAL    | 0.25                     | 2.35 | 1.69 | 2.35               | 1.69 | 2.44 | 2.44  | 2.60               | 1.94 | 4.04 | 4.29  | 2.77                         | 2.00 | 4.04 | 4.80  |
| d4T                  | 3TCq   | MVC    | 0.25                     | 2.35 | 1.72 | 2.35               | 1.73 | 2.41 | 2.41  | 2.60               | 1.97 | 4.07 | 4.32  | 2.77                         | 1.95 | 5.32 | 5.41  |
| d4T                  | 3TCq   | MVC    | 0.25                     | 2.35 | 1.72 | 2.35               | 1.73 | 2.41 | 2.41  | 2.60               | 1.97 | 4.07 | 4.32  | 2.77                         | 1.95 | 5.32 | 5.41  |
| d4T                  | FTC    | ddlq   | 0.25                     | 2.79 | 0.84 | 2.79               | 0.90 | 2.86 | 2.86  | 3.04               | 1.09 | 3.63 | 3.88  | 3.21                         | 1.43 | 3.10 | 4.26  |
| AZTb                 | TDF    | NFVt   | 0.37                     | 0.86 | 2.76 | 0.87               | 2.76 | 2.76 | 2.76  | 1.23               | 3.12 | 3.62 | 3.98  | 1.92                         | 3.20 | 3.16 | 4.36  |
| AZTb                 | 3TCb   | RAL    | 0.37                     | 2.30 | 1.69 | 2.30               | 1.69 | 2.39 | 2.39  | 2.67               | 2.05 | 3.99 | 4.36  | 2.91                         | 2.07 | 4.00 | 4.80  |
| AZTb                 | FTC    | ddlB   | 0.37                     | 2.79 | 0.75 | 2.79               | 0.83 | 2.85 | 2.85  | 3.16               | 1.11 | 3.54 | 3.90  | 3.55                         | 1.50 | 3.06 | 4.38  |
| d4T                  | ddlB   | NFVb   | 0.25                     | 0.75 | 2.80 | 0.82               | 2.80 | 2.96 | 2.96  | 0.99               | 3.05 | 3.55 | 3.80  | 1.34                         | 2.96 | 3.33 | 3.83  |
| AZTb                 | 3TCb   | MVC    | 0.37                     | 2.30 | 1.72 | 2.30               | 1.72 | 2.36 | 2.36  | 2.67               | 2.09 | 4.03 | 4.40  | 2.91                         | 2.06 | 5.28 | 5.53  |
| AZTb                 | ABCb   | ENF    | 0.37                     | 1.91 | 2.07 | 1.91               | 2.07 | 2.41 | 2.41  | 2.28               | 2.44 | 3.98 | 4.35  | 2.84                         | 2.51 | 3.61 | 5.21  |

| Regimen <sup>a</sup> |        |        | HIV <sup>ave</sup> |      |      |                    |      |      |       |                    |      |      |       |                       |      |      |       |
|----------------------|--------|--------|--------------------|------|------|--------------------|------|------|-------|--------------------|------|------|-------|-----------------------|------|------|-------|
|                      |        |        | Single drug        |      |      | Loewe <sup>b</sup> |      |      |       | Bliss <sup>c</sup> |      |      |       | DI Index <sup>d</sup> |      |      |       |
| Drug 1               | Drug 2 | Drug 3 | 1                  | 2    | 3    | 1,2                | 1,3  | 2,3  | 1,2,3 | 1,2                | 1,3  | 2,3  | 1,2,3 | 1,2                   | 1,3  | 2,3  | 1,2,3 |
| AZTt                 | TDF    | NFVt   | 0.39               | 0.86 | 2.76 | 0.87               | 2.76 | 2.76 | 2.76  | 1.25               | 3.15 | 3.62 | 4.01  | 1.99                  | 3.23 | 3.16 | 4.41  |
| d4T                  | ddlq   | NFVt   | 0.25               | 0.84 | 2.76 | 0.90               | 2.76 | 2.93 | 2.93  | 1.09               | 3.01 | 3.60 | 3.84  | 1.45                  | 2.92 | 3.35 | 3.92  |
| AZTt                 | 3TCb   | RAL    | 0.39               | 2.30 | 1.69 | 2.30               | 1.69 | 2.39 | 2.39  | 2.70               | 2.08 | 3.99 | 4.38  | 2.95                  | 2.10 | 4.00 | 4.83  |
| AZTt                 | FTC    | ddlq   | 0.39               | 2.79 | 0.75 | 2.79               | 0.84 | 2.85 | 2.85  | 3.18               | 1.14 | 3.54 | 3.93  | 3.60                  | 1.54 | 3.06 | 4.42  |
| AZTt                 | 3TCb   | MVC    | 0.39               | 2.30 | 1.72 | 2.30               | 1.72 | 2.36 | 2.36  | 2.70               | 2.12 | 4.03 | 4.42  | 2.95                  | 2.09 | 5.28 | 5.56  |
| AZTt                 | ABCb   | ENF    | 0.39               | 1.91 | 2.07 | 1.91               | 2.07 | 2.41 | 2.41  | 2.31               | 2.46 | 3.98 | 4.38  | 2.91                  | 2.54 | 3.61 | 5.26  |
| AZTb                 | ddlq   | NFVt   | 0.37               | 0.75 | 2.76 | 0.83               | 2.76 | 2.92 | 2.92  | 1.11               | 3.12 | 3.50 | 3.87  | 1.51                  | 3.20 | 3.29 | 4.04  |
| AZTb                 | FTC    | TDF    | 0.37               | 2.79 | 0.86 | 2.79               | 0.87 | 2.79 | 2.79  | 3.16               | 1.23 | 3.65 | 4.02  | 3.55                  | 1.91 | 3.07 | 4.77  |
| AZTt                 | ddlq   | NFVt   | 0.39               | 0.75 | 2.76 | 0.84               | 2.76 | 2.92 | 2.92  | 1.14               | 3.15 | 3.50 | 3.90  | 1.55                  | 3.23 | 3.29 | 4.07  |
| d4T                  | ddIEC  | EVG/c  | 0.25               | 2.56 | 1.41 | 2.56               | 1.42 | 2.60 | 2.60  | 2.81               | 1.66 | 3.97 | 4.22  | 3.29                  | 1.69 | 4.20 | 5.51  |
| AZTt                 | FTC    | TDF    | 0.39               | 2.79 | 0.86 | 2.79               | 0.87 | 2.79 | 2.79  | 3.18               | 1.25 | 3.65 | 4.04  | 3.60                  | 1.98 | 3.07 | 4.83  |
| AZTb                 | TDF    | NFVb   | 0.37               | 0.86 | 2.80 | 0.87               | 2.80 | 2.80 | 2.80  | 1.23               | 3.17 | 3.66 | 4.03  | 1.92                  | 3.25 | 3.20 | 4.40  |
| AZTb                 | 3TCq   | RAL    | 0.37               | 2.35 | 1.69 | 2.35               | 1.69 | 2.44 | 2.44  | 2.72               | 2.05 | 4.04 | 4.40  | 2.95                  | 2.07 | 4.04 | 4.85  |
| AZTb                 | 3TCq   | MVC    | 0.37               | 2.35 | 1.72 | 2.35               | 1.72 | 2.41 | 2.41  | 2.72               | 2.09 | 4.07 | 4.44  | 2.95                  | 2.06 | 5.32 | 5.57  |
| AZTb                 | FTC    | ddlq   | 0.37               | 2.79 | 0.84 | 2.79               | 0.91 | 2.86 | 2.86  | 3.16               | 1.21 | 3.63 | 4.00  | 3.55                  | 1.60 | 3.10 | 4.52  |
| AZTt                 | TDF    | NFVb   | 0.39               | 0.86 | 2.80 | 0.87               | 2.80 | 2.80 | 2.80  | 1.25               | 3.19 | 3.66 | 4.05  | 1.99                  | 3.28 | 3.20 | 4.46  |
| AZTt                 | 3TCq   | RAL    | 0.39               | 2.35 | 1.69 | 2.35               | 1.69 | 2.44 | 2.44  | 2.74               | 2.08 | 4.04 | 4.43  | 2.99                  | 2.10 | 4.04 | 4.88  |
| d4T                  | ddlq   | NFVb   | 0.25               | 0.84 | 2.80 | 0.90               | 2.80 | 2.98 | 2.98  | 1.09               | 3.05 | 3.64 | 3.89  | 1.45                  | 2.96 | 3.40 | 3.95  |
| AZTt                 | 3TCq   | MVC    | 0.39               | 2.35 | 1.72 | 2.35               | 1.72 | 2.41 | 2.41  | 2.74               | 2.12 | 4.07 | 4.47  | 2.99                  | 2.09 | 5.32 | 5.61  |
| AZTb                 | ddlq   | NFVb   | 0.37               | 0.75 | 2.80 | 0.83               | 2.80 | 2.96 | 2.96  | 1.11               | 3.17 | 3.55 | 3.91  | 1.51                  | 3.25 | 3.33 | 4.08  |
| AZTt                 | FTC    | ddlq   | 0.39               | 2.79 | 0.84 | 2.79               | 0.92 | 2.86 | 2.86  | 3.18               | 1.23 | 3.63 | 4.02  | 3.60                  | 1.64 | 3.10 | 4.56  |
| AZTb                 | ddlq   | NFVt   | 0.37               | 0.84 | 2.76 | 0.91               | 2.76 | 2.93 | 2.93  | 1.21               | 3.12 | 3.60 | 3.96  | 1.61                  | 3.20 | 3.35 | 4.16  |
| ddlq                 | ENF    | RAL    | 0.75               | 2.07 | 1.69 | 2.24               | 1.83 | 2.29 | 2.40  | 2.82               | 2.43 | 3.76 | 4.50  | 2.71                  | 2.38 | 3.96 | 4.47  |
| 3TCb                 | ddlq   | EVG/c  | 2.30               | 0.75 | 1.41 | 2.39               | 2.35 | 1.60 | 2.43  | 3.05               | 3.72 | 2.16 | 4.46  | 2.55                  | 4.06 | 2.25 | 4.33  |
| AZTt                 | ddlq   | NFVb   | 0.39               | 0.75 | 2.80 | 0.84               | 2.80 | 2.96 | 2.96  | 1.14               | 3.19 | 3.55 | 3.94  | 1.55                  | 3.28 | 3.33 | 4.12  |
| TDF                  | ENF    | RAL    | 0.86               | 2.07 | 1.69 | 2.08               | 1.69 | 2.29 | 2.29  | 2.93               | 2.55 | 3.76 | 4.62  | 2.63                  | 2.71 | 3.96 | 4.65  |
| ddlq                 | ENF    | MVC    | 0.75               | 2.07 | 1.72 | 2.24               | 1.83 | 2.26 | 2.37  | 2.82               | 2.47 | 3.79 | 4.54  | 2.71                  | 2.54 | 4.70 | 5.11  |
| TDF                  | ENF    | MVC    | 0.86               | 2.07 | 1.72 | 2.08               | 1.73 | 2.26 | 2.26  | 2.93               | 2.58 | 3.79 | 4.65  | 2.63                  | 2.95 | 4.70 | 5.38  |
| AZTt                 | ddlq   | NFVt   | 0.39               | 0.84 | 2.76 | 0.92               | 2.76 | 2.93 | 2.93  | 1.23               | 3.15 | 3.60 | 3.99  | 1.66                  | 3.23 | 3.35 | 4.19  |
| ddlq                 | ABCq   | RAL    | 0.75               | 2.14 | 1.69 | 2.24               | 1.83 | 2.26 | 2.35  | 2.89               | 2.43 | 3.83 | 4.58  | 2.38                  | 2.38 | 3.68 | 3.93  |
| 3TCb                 | TDF    | EVG/c  | 2.30               | 0.86 | 1.41 | 2.30               | 2.35 | 1.43 | 2.35  | 3.16               | 3.72 | 2.27 | 4.58  | 2.97                  | 4.06 | 2.24 | 4.64  |
| ddlq                 | ABCq   | MVC    | 0.75               | 2.14 | 1.72 | 2.24               | 1.83 | 2.23 | 2.32  | 2.89               | 2.47 | 3.87 | 4.61  | 2.38                  | 2.54 | 4.41 | 4.58  |
| d4T                  | 3TCb   | ABCb   | 0.25               | 2.30 | 1.91 | 2.31               | 1.92 | 2.47 | 2.47  | 2.55               | 2.16 | 4.22 | 4.47  | 2.72                  | 2.41 | 2.82 | 4.98  |
| AZTb                 | ddIEC  | EVG/c  | 0.37               | 2.56 | 1.41 | 2.56               | 1.42 | 2.60 | 2.60  | 2.93               | 1.78 | 3.97 | 4.34  | 3.41                  | 1.83 | 4.20 | 5.34  |
| TDF                  | ABCq   | RAL    | 0.86               | 2.14 | 1.69 | 2.14               | 1.69 | 2.26 | 2.26  | 3.00               | 2.55 | 3.83 | 4.69  | 2.11                  | 2.71 | 3.68 | 4.11  |
| TDF                  | ABCq   | MVC    | 0.86               | 2.14 | 1.72 | 2.14               | 1.73 | 2.23 | 2.23  | 3.00               | 2.58 | 3.87 | 4.72  | 2.11                  | 2.95 | 4.41 | 4.87  |
| AZTt                 | ddIEC  | EVG/c  | 0.39               | 2.56 | 1.41 | 2.56               | 1.42 | 2.60 | 2.60  | 2.95               | 1.81 | 3.97 | 4.37  | 3.46                  | 1.86 | 4.20 | 5.38  |
| 3TCq                 | ddlq   | EVG/c  | 2.35               | 0.75 | 1.41 | 2.44               | 2.39 | 1.60 | 2.47  | 3.10               | 3.76 | 2.16 | 4.51  | 2.59                  | 4.10 | 2.25 | 4.38  |
| AZTb                 | ddlq   | NFVb   | 0.37               | 0.84 | 2.80 | 0.91               | 2.80 | 2.98 | 2.98  | 1.21               | 3.17 | 3.64 | 4.01  | 1.61                  | 3.25 | 3.40 | 4.20  |
| d4T                  | ABCq   | ENF    | 0.25               | 2.14 | 2.07 | 2.14               | 2.07 | 2.53 | 2.53  | 2.39               | 2.32 | 4.21 | 4.46  | 2.65                  | 2.33 | 3.82 | 4.89  |
| 3TCb                 | ddlq   | EVG/c  | 2.30               | 0.84 | 1.41 | 2.41               | 2.35 | 1.62 | 2.44  | 3.14               | 3.72 | 2.25 | 4.56  | 2.58                  | 4.06 | 2.36 | 4.42  |
| 3TCq                 | TDF    | EVG/c  | 2.35               | 0.86 | 1.41 | 2.35               | 2.39 | 1.43 | 2.39  | 3.21               | 3.76 | 2.27 | 4.62  | 3.02                  | 4.10 | 2.24 | 4.69  |
| ddlq                 | ENF    | RAL    | 0.84               | 2.07 | 1.69 | 2.26               | 1.85 | 2.29 | 2.41  | 2.91               | 2.53 | 3.76 | 4.60  | 2.79                  | 2.47 | 3.96 | 4.56  |
| ddlq                 | ENF    | MVC    | 0.84               | 2.07 | 1.72 | 2.26               | 1.85 | 2.26 | 2.38  | 2.91               | 2.56 | 3.79 | 4.63  | 2.79                  | 2.64 | 4.70 | 5.21  |
| AZTt                 | ddlq   | NFVb   | 0.39               | 0.84 | 2.80 | 0.92               | 2.80 | 2.98 | 2.98  | 1.23               | 3.19 | 3.64 | 4.03  | 1.66                  | 3.28 | 3.40 | 4.23  |
| d4T                  | 3TCq   | ABCb   | 0.25               | 2.35 | 1.91 | 2.35               | 1.92 | 2.51 | 2.51  | 2.60               | 2.16 | 4.26 | 4.51  | 2.77                  | 2.41 | 2.86 | 5.02  |
| ddlq                 | ABCq   | RAL    | 0.84               | 2.14 | 1.69 | 2.25               | 1.85 | 2.26 | 2.36  | 2.98               | 2.53 | 3.83 | 4.67  | 2.41                  | 2.47 | 3.68 | 4.00  |
| ddlq                 | ABCq   | MVC    | 0.84               | 2.14 | 1.72 | 2.25               | 1.85 | 2.23 | 2.33  | 2.98               | 2.56 | 3.87 | 4.70  | 2.41                  | 2.64 | 4.41 | 4.67  |
| AZTb                 | 3TCb   | ABCb   | 0.37               | 2.30 | 1.91 | 2.30               | 1.91 | 2.47 | 2.47  | 2.67               | 2.28 | 4.22 | 4.59  | 2.91                  | 2.84 | 2.82 | 5.55  |
| 3TCq                 | ddlq   | EVG/c  | 2.35               | 0.84 | 1.41 | 2.45               | 2.39 | 1.62 | 2.48  | 3.19               | 3.76 | 2.25 | 4.60  | 2.62                  | 4.10 | 2.36 | 4.46  |
| AZTt                 | 3TCb   | ABCb   | 0.39               | 2.30 | 1.91 | 2.30               | 1.91 | 2.47 | 2.47  | 2.70               | 2.31 | 4.22 | 4.61  | 2.95                  | 2.91 | 2.82 | 5.61  |
| AZTb                 | ABCq   | ENF    | 0.37               | 2.14 | 2.07 | 2.14               | 2.07 | 2.53 | 2.53  | 2.51               | 2.44 | 4.21 | 4.58  | 3.07                  | 2.51 | 3.82 | 5.51  |
| AZTt                 | ABCq   | ENF    | 0.39               | 2.14 | 2.07 | 2.14               | 2.07 | 2.53 | 2.53  | 2.54               | 2.46 | 4.21 | 4.61  | 3.13                  | 2.54 | 3.82 | 5.56  |
| AZTb                 | 3TCq   | ABCb   | 0.37               | 2.35 | 1.91 | 2.35               | 1.91 | 2.51 | 2.51  | 2.72               | 2.28 | 4.26 | 4.63  | 2.95                  | 2.84 | 2.86 | 5.59  |
| d4T                  | ddIEC  | MVC    | 0.25               | 2.56 | 1.72 | 2.56               | 1.73 | 2.62 | 2.62  | 2.81               | 1.97 | 4.28 | 4.53  | 3.29                  | 1.95 | 4.48 | 5.84  |
| d4T                  | ddIEC  | RAL    | 0.25               | 2.56 | 1.69 | 2.56               | 1.69 | 2.66 | 2.66  | 2.81               | 1.94 | 4.25 | 4.50  | 3.29                  | 2.00 | 4.11 | 5.78  |
| AZTt                 | 3TCq   | ABCb   | 0.39               | 2.35 | 1.91 | 2.35               | 1.91 | 2.51 | 2.51  | 2.74               | 2.31 | 4.26 | 4.66  | 2.99                  | 2.91 | 2.86 | 5.65  |
| ABCb                 | EVG/c  | MVC    | 1.91               | 1.41 | 1.72 | 2.02               | 2.07 | 1.84 | 2.14  | 3.33               | 3.64 | 3.14 | 5.05  | 3.39                  | 4.16 | 3.20 | 5.51  |
| 3TCb                 | ddlq   | RAL    | 2.30               | 0.75 | 1.69 | 2.39               | 2.39 | 1.83 | 2.47  | 3.05               | 3.99 | 2.43 | 4.74  | 2.55                  | 4.00 | 2.38 | 4.20  |
| 3TCb                 | ddlq   | MVC    | 2.30               | 0.75 | 1.72 | 2.39               | 2.36 | 1.83 | 2.44  | 3.05               | 4.03 | 2.47 | 4.77  | 2.55                  | 5.28 | 2.54 | 5.30  |
| 3TCb                 | ddlq   | MVC    | 2.30               | 0.75 | 1.72 | 2.39               | 2.36 | 1.83 | 2.44  | 3.05               | 4.03 | 2.47 | 4.77  | 2.55                  | 5.28 | 2.54 | 5.30  |
| d4T                  | EVG/c  | NFVt   | 0.25               | 1.41 | 2.76 | 1.42               | 2.76 | 2.82 | 2.82  | 1.66               | 3.01 | 4.17 | 4.42  | 1.70                  | 2.92 | 4.61 | 4.55  |
| ddlq                 | ABCb   | ENF    | 0.75               | 1.91 | 2.07 | 2.04               | 2.24 | 2.41 | 2.51  | 2.66               | 2.82 | 3.98 | 4.73  | 2.17                  | 2.71 | 3.61 | 3.94  |
| 3TCb                 | TDF    | RAL    | 2.30               | 0.86 | 1.69 | 2.30               | 2.39 | 1.69 | 2.39  | 3.16               | 3.99 | 2.55 | 4.85  | 2.97                  | 4.00 | 2.71 | 4.82  |
| FTC                  | ddlq   | TDF    | 2.79               | 0.75 | 0.86 | 2.85               | 2.79 | 1.06 | 2.85  | 3.54               | 3.65 | 1.61 | 4.40  | 3.06                  | 3.07 | 0.98 | 3.26  |
| 3TCb                 | TDF    | MVC    | 2.30               | 0.86 | 1.72 | 2.30               | 2.36 | 1.73 | 2.36  | 3.16               | 4.03 | 2.58 | 4.89  | 2.97                  | 5.28 | 2.95 | 5.92  |
| d4T                  | 3TCb   | ABCq   | 0.25               | 2.30 | 2.14 | 2.31               | 2.14 | 2.56 | 2.56  | 2.55               | 2.39 | 4.45 | 4.70  | 2.72                  | 2.64 | 2.93 | 5.26  |
| TDF                  | ABCb   | ENF    | 0.86               | 1.91 | 2.07 | 1.92               | 2.08 | 2.41 | 2.41  | 2.77               | 2.93 | 3.98 | 4.84  | 1.89                  | 2.62 | 3.61 | 3.73  |
| d4T                  | 3TCb   | ENF    | 0.25               | 2.30 | 2.07 | 2.31               | 2.07 | 2.63 | 2.63  | 2.55               | 2.32 | 4.37 | 4.62  | 2.72                  | 2.33 | 4.55 | 5.14  |
| d4T                  | FTC    | EVG/c  | 0.25               | 2.79 | 1.41 | 2.79               | 1.42 | 2.80 | 2.80  | 3.04               | 1.66 | 4.20 | 4.45  | 3.21                  | 1.69 | 4.28 | 4.93  |

| Regimen <sup>a</sup> |        |        | HIV <sup>ave</sup> |      |      |                    |      |      |       |                    |      |      |       |                       |      |      |       |
|----------------------|--------|--------|--------------------|------|------|--------------------|------|------|-------|--------------------|------|------|-------|-----------------------|------|------|-------|
|                      |        |        | Single drug        |      |      | Loewe <sup>b</sup> |      |      |       | Bliss <sup>c</sup> |      |      |       | DI Index <sup>d</sup> |      |      |       |
| Drug 1               | Drug 2 | Drug 3 | 1                  | 2    | 3    | 1,2                | 1,3  | 2,3  | 1,2,3 | 1,2                | 1,3  | 2,3  | 1,2,3 | 1,2                   | 1,3  | 2,3  | 1,2,3 |
| AZTb                 | ddIEC  | MVC    | 0.37               | 2.56 | 1.72 | 2.56               | 1.72 | 2.62 | 2.62  | 2.93               | 2.09 | 4.28 | 4.65  | 3.41                  | 2.06 | 4.48 | 5.63  |
| AZTb                 | ddIEC  | MVC    | 0.37               | 2.56 | 1.72 | 2.56               | 1.72 | 2.62 | 2.62  | 2.93               | 2.09 | 4.28 | 4.65  | 3.41                  | 2.06 | 4.48 | 5.63  |
| AZTb                 | ddIEC  | RAL    | 0.37               | 2.56 | 1.69 | 2.56               | 1.69 | 2.66 | 2.66  | 2.93               | 2.05 | 4.25 | 4.61  | 3.41                  | 2.07 | 4.11 | 5.47  |
| ddlB                 | TDF    | NFVt   | 0.75               | 0.86 | 2.76 | 1.06               | 2.92 | 2.76 | 2.92  | 1.61               | 3.50 | 3.62 | 4.36  | 1.03                  | 3.29 | 3.16 | 3.60  |
| AZTt                 | ddIEC  | MVC    | 0.39               | 2.56 | 1.72 | 2.56               | 1.72 | 2.62 | 2.62  | 2.95               | 2.12 | 4.28 | 4.68  | 3.46                  | 2.09 | 4.48 | 5.68  |
| AZTt                 | ddIEC  | RAL    | 0.39               | 2.56 | 1.69 | 2.56               | 1.69 | 2.66 | 2.66  | 2.95               | 2.08 | 4.25 | 4.64  | 3.46                  | 2.10 | 4.11 | 5.52  |
| 3TCq                 | ddlB   | RAL    | 2.35               | 0.75 | 1.69 | 2.44               | 2.44 | 1.83 | 2.51  | 3.10               | 4.04 | 2.43 | 4.78  | 2.59                  | 4.04 | 2.38 | 4.24  |
| 3TCq                 | ddlB   | MVC    | 2.35               | 0.75 | 1.72 | 2.44               | 2.41 | 1.83 | 2.49  | 3.10               | 4.07 | 2.47 | 4.82  | 2.59                  | 5.32 | 2.54 | 5.34  |
| 3TCb                 | ddlq   | RAL    | 2.30               | 0.84 | 1.69 | 2.41               | 2.39 | 1.85 | 2.48  | 3.14               | 3.99 | 2.53 | 4.83  | 2.58                  | 4.00 | 2.47 | 4.27  |
| 3TCb                 | ddlq   | MVC    | 2.30               | 0.84 | 1.72 | 2.41               | 2.36 | 1.85 | 2.45  | 3.14               | 4.03 | 2.56 | 4.87  | 2.58                  | 5.28 | 2.64 | 5.40  |
| d4T                  | 3TCq   | ABCq   | 0.25               | 2.35 | 2.14 | 2.35               | 2.14 | 2.59 | 2.59  | 2.60               | 2.39 | 4.49 | 4.74  | 2.77                  | 2.64 | 2.96 | 5.30  |
| 3TCq                 | TDF    | RAL    | 2.35               | 0.86 | 1.69 | 2.35               | 2.44 | 1.69 | 2.44  | 3.21               | 4.04 | 2.55 | 4.90  | 3.02                  | 4.04 | 2.71 | 4.86  |
| d4T                  | 3TCq   | ENF    | 0.25               | 2.35 | 2.07 | 2.35               | 2.07 | 2.67 | 2.67  | 2.60               | 2.32 | 4.42 | 4.67  | 2.77                  | 2.33 | 4.60 | 5.19  |
| 3TCq                 | TDF    | MVC    | 2.35               | 0.86 | 1.72 | 2.35               | 2.41 | 1.73 | 2.41  | 3.21               | 4.07 | 2.58 | 4.93  | 3.02                  | 5.32 | 2.95 | 5.96  |
| d4T                  | EVG/c  | NFVb   | 0.25               | 1.41 | 2.80 | 1.42               | 2.80 | 2.88 | 2.88  | 1.66               | 3.05 | 4.22 | 4.47  | 1.70                  | 2.96 | 4.65 | 4.59  |
| FTC                  | ddlq   | TDF    | 2.79               | 0.84 | 0.86 | 2.86               | 2.79 | 1.10 | 2.86  | 3.63               | 3.65 | 1.70 | 4.49  | 3.10                  | 3.07 | 1.03 | 3.29  |
| ddlq                 | ABCb   | ENF    | 0.84               | 1.91 | 2.07 | 2.06               | 2.26 | 2.41 | 2.52  | 2.75               | 2.91 | 3.98 | 4.82  | 2.20                  | 2.79 | 3.61 | 4.00  |
| AZTb                 | EVG/c  | NFVt   | 0.37               | 1.41 | 2.76 | 1.42               | 2.76 | 2.82 | 2.82  | 1.78               | 3.12 | 4.17 | 4.54  | 1.84                  | 3.20 | 4.61 | 4.97  |
| ddlB                 | TDF    | NFVb   | 0.75               | 0.86 | 2.80 | 1.06               | 2.96 | 2.80 | 2.96  | 1.61               | 3.55 | 3.66 | 4.41  | 1.03                  | 3.33 | 3.20 | 3.64  |
| AZTb                 | 3TCb   | ABCq   | 0.37               | 2.30 | 2.14 | 2.30               | 2.14 | 2.56 | 2.56  | 2.67               | 2.51 | 4.45 | 4.81  | 2.91                  | 3.07 | 2.93 | 5.87  |
| AZTb                 | 3TCb   | ENF    | 0.37               | 2.30 | 2.07 | 2.30               | 2.07 | 2.63 | 2.63  | 2.67               | 2.44 | 4.37 | 4.74  | 2.91                  | 2.51 | 4.55 | 5.34  |
| AZTb                 | FTC    | EVG/c  | 0.37               | 2.79 | 1.41 | 2.79               | 1.42 | 2.80 | 2.80  | 3.16               | 1.78 | 4.20 | 4.57  | 3.55                  | 1.83 | 4.28 | 5.36  |
| AZTt                 | EVG/c  | NFVt   | 0.39               | 1.41 | 2.76 | 1.42               | 2.76 | 2.82 | 2.82  | 1.81               | 3.15 | 4.17 | 4.56  | 1.87                  | 3.23 | 4.61 | 5.00  |
| ddlq                 | TDF    | NFVt   | 0.84               | 0.86 | 2.76 | 1.10               | 2.93 | 2.76 | 2.93  | 1.70               | 3.60 | 3.62 | 4.45  | 1.07                  | 3.35 | 3.16 | 3.65  |
| 3TCq                 | ddlq   | RAL    | 2.35               | 0.84 | 1.69 | 2.45               | 2.44 | 1.85 | 2.52  | 3.19               | 4.04 | 2.53 | 4.88  | 2.62                  | 4.04 | 2.47 | 4.31  |
| AZTt                 | 3TCb   | ABCq   | 0.39               | 2.30 | 2.14 | 2.30               | 2.14 | 2.56 | 2.56  | 2.70               | 2.54 | 4.45 | 4.84  | 2.95                  | 3.13 | 2.93 | 5.93  |
| AZTt                 | 3TCb   | ENF    | 0.39               | 2.30 | 2.07 | 2.30               | 2.07 | 2.63 | 2.63  | 2.70               | 2.46 | 4.37 | 4.77  | 2.95                  | 2.54 | 4.55 | 5.37  |
| AZTt                 | FTC    | EVG/c  | 0.39               | 2.79 | 1.41 | 2.79               | 1.42 | 2.80 | 2.80  | 3.18               | 1.81 | 4.20 | 4.60  | 3.60                  | 1.86 | 4.28 | 5.40  |
| 3TCq                 | ddlq   | MVC    | 2.35               | 0.84 | 1.72 | 2.45               | 2.41 | 1.85 | 2.50  | 3.19               | 4.07 | 2.56 | 4.91  | 2.62                  | 5.32 | 2.64 | 5.44  |
| ddIEC                | TDF    | EVG/c  | 2.56               | 0.86 | 1.41 | 2.56               | 2.60 | 1.43 | 2.60  | 3.42               | 3.97 | 2.27 | 4.83  | 2.51                  | 4.20 | 2.24 | 4.33  |
| AZTb                 | 3TCq   | ABCq   | 0.37               | 2.35 | 2.14 | 2.35               | 2.14 | 2.59 | 2.59  | 2.72               | 2.51 | 4.49 | 4.86  | 2.95                  | 3.07 | 2.96 | 5.92  |
| AZTb                 | 3TCq   | ENF    | 0.37               | 2.35 | 2.07 | 2.35               | 2.07 | 2.67 | 2.67  | 2.72               | 2.44 | 4.42 | 4.79  | 2.95                  | 2.51 | 4.60 | 5.39  |
| AZTb                 | EVG/c  | NFVb   | 0.37               | 1.41 | 2.80 | 1.42               | 2.80 | 2.88 | 2.88  | 1.78               | 3.17 | 4.22 | 4.58  | 1.84                  | 3.25 | 4.65 | 5.01  |
| d4T                  | ddIEC  | ABCb   | 0.25               | 2.56 | 1.91 | 2.56               | 1.92 | 2.74 | 2.74  | 2.81               | 2.16 | 4.47 | 4.72  | 3.29                  | 2.41 | 3.11 | 6.14  |
| AZTt                 | 3TCq   | ABCq   | 0.39               | 2.35 | 2.14 | 2.35               | 2.14 | 2.59 | 2.59  | 2.74               | 2.54 | 4.49 | 4.88  | 2.99                  | 3.13 | 2.96 | 5.97  |
| AZTt                 | 3TCq   | ENF    | 0.39               | 2.35 | 2.07 | 2.35               | 2.07 | 2.67 | 2.67  | 2.74               | 2.46 | 4.42 | 4.81  | 2.99                  | 2.54 | 4.60 | 5.42  |
| ddlq                 | TDF    | NFVb   | 0.84               | 0.86 | 2.80 | 1.10               | 2.98 | 2.80 | 2.98  | 1.70               | 3.64 | 3.66 | 4.50  | 1.07                  | 3.40 | 3.20 | 3.69  |
| AZTt                 | EVG/c  | NFVb   | 0.39               | 1.41 | 2.80 | 1.42               | 2.80 | 2.88 | 2.88  | 1.81               | 3.19 | 4.22 | 4.61  | 1.87                  | 3.28 | 4.65 | 5.04  |
| 3TCb                 | ddlB   | ABCb   | 2.30               | 0.75 | 1.91 | 2.39               | 2.47 | 2.04 | 2.55  | 3.05               | 4.22 | 2.66 | 4.96  | 2.55                  | 2.82 | 2.17 | 3.07  |
| ABCb                 | RAL    | MVC    | 1.91               | 1.69 | 1.72 | 2.10               | 2.07 | 1.94 | 2.20  | 3.60               | 3.64 | 3.41 | 5.32  | 3.45                  | 4.16 | 3.94 | 5.99  |
| ABCb                 | RAL    | MVC    | 1.91               | 1.69 | 1.72 | 2.10               | 2.07 | 1.94 | 2.20  | 3.60               | 3.64 | 3.41 | 5.32  | 3.45                  | 4.16 | 3.94 | 5.99  |
| ENF                  | EVG/c  | MVC    | 2.07               | 1.41 | 1.72 | 2.20               | 2.26 | 1.84 | 2.32  | 3.48               | 3.79 | 3.14 | 5.21  | 3.46                  | 4.70 | 3.20 | 5.94  |
| d4T                  | FTC    | RAL    | 0.25               | 2.79 | 1.69 | 2.79               | 1.69 | 2.82 | 2.82  | 3.04               | 1.94 | 4.48 | 4.73  | 3.21                  | 2.00 | 4.61 | 5.33  |
| 3TCb                 | TDF    | ABCb   | 2.30               | 0.86 | 1.91 | 2.30               | 2.47 | 1.92 | 2.47  | 3.16               | 4.22 | 2.77 | 5.08  | 2.97                  | 2.82 | 1.88 | 3.42  |
| ABCq                 | EVG/c  | MVC    | 2.14               | 1.41 | 1.72 | 2.20               | 2.23 | 1.84 | 2.28  | 3.56               | 3.87 | 3.14 | 5.28  | 3.62                  | 4.41 | 3.20 | 5.76  |
| d4T                  | FTC    | MVC    | 0.25               | 2.79 | 1.72 | 2.79               | 1.73 | 2.80 | 2.80  | 3.04               | 1.97 | 4.51 | 4.76  | 3.21                  | 1.95 | 4.79 | 5.31  |
| d4T                  | FTC    | MVC    | 0.25               | 2.79 | 1.72 | 2.79               | 1.73 | 2.80 | 2.80  | 3.04               | 1.97 | 4.51 | 4.76  | 3.21                  | 1.95 | 4.79 | 5.31  |
| d4T                  | RAL    | NFVt   | 0.25               | 1.69 | 2.76 | 1.69               | 2.76 | 2.87 | 2.87  | 1.94               | 3.01 | 4.44 | 4.69  | 2.01                  | 2.92 | 5.85 | 5.51  |
| ddlB                 | ABCq   | ENF    | 0.75               | 2.14 | 2.07 | 2.24               | 2.24 | 2.53 | 2.62  | 2.89               | 2.82 | 4.21 | 4.96  | 2.38                  | 2.71 | 3.82 | 4.11  |
| AZTb                 | ddIEC  | ABCb   | 0.37               | 2.56 | 1.91 | 2.56               | 1.91 | 2.74 | 2.74  | 2.93               | 2.28 | 4.47 | 4.84  | 3.41                  | 2.84 | 3.11 | 6.25  |
| 3TCq                 | ddlB   | ABCb   | 2.35               | 0.75 | 1.91 | 2.44               | 2.51 | 2.04 | 2.59  | 3.10               | 4.26 | 2.66 | 5.01  | 2.59                  | 2.86 | 2.17 | 3.11  |
| TDF                  | ABCq   | ENF    | 0.86               | 2.14 | 2.07 | 2.14               | 2.08 | 2.53 | 2.53  | 3.00               | 2.93 | 4.21 | 5.07  | 2.11                  | 2.62 | 3.82 | 3.88  |
| AZTt                 | ddIEC  | ABCb   | 0.39               | 2.56 | 1.91 | 2.56               | 1.91 | 2.74 | 2.74  | 2.95               | 2.31 | 4.47 | 4.87  | 3.46                  | 2.91 | 3.11 | 6.31  |
| 3TCb                 | ddlq   | ABCb   | 2.30               | 0.84 | 1.91 | 2.41               | 2.47 | 2.06 | 2.56  | 3.14               | 4.22 | 2.75 | 5.06  | 2.58                  | 2.82 | 2.20 | 3.09  |
| 3TCq                 | TDF    | ABCb   | 2.35               | 0.86 | 1.91 | 2.35               | 2.51 | 1.92 | 2.51  | 3.21               | 4.26 | 2.77 | 5.12  | 3.02                  | 2.86 | 1.88 | 3.47  |
| AZTb                 | FTC    | RAL    | 0.37               | 2.79 | 1.69 | 2.79               | 1.69 | 2.82 | 2.82  | 3.16               | 2.05 | 4.48 | 4.84  | 3.55                  | 2.07 | 4.61 | 5.70  |
| d4T                  | RAL    | NFVb   | 0.25               | 1.69 | 2.80 | 1.69               | 2.80 | 2.93 | 2.93  | 1.94               | 3.05 | 4.49 | 4.74  | 2.01                  | 2.96 | 5.88 | 5.54  |
| ddlq                 | ABCq   | ENF    | 0.84               | 2.14 | 2.07 | 2.25               | 2.26 | 2.53 | 2.63  | 2.98               | 2.91 | 4.21 | 5.05  | 2.41                  | 2.79 | 3.82 | 4.17  |
| AZTb                 | FTC    | MVC    | 0.37               | 2.79 | 1.72 | 2.79               | 1.72 | 2.80 | 2.80  | 3.16               | 2.09 | 4.51 | 4.88  | 3.55                  | 2.06 | 4.79 | 5.77  |
| AZTb                 | RAL    | NFVt   | 0.37               | 1.69 | 2.76 | 1.69               | 2.76 | 2.87 | 2.87  | 2.05               | 3.12 | 4.44 | 4.81  | 2.08                  | 3.20 | 5.85 | 5.86  |
| AZTt                 | FTC    | RAL    | 0.39               | 2.79 | 1.69 | 2.79               | 1.69 | 2.82 | 2.82  | 3.18               | 2.08 | 4.48 | 4.87  | 3.60                  | 2.10 | 4.61 | 5.74  |
| 3TCq                 | ddlq   | ABCb   | 2.35               | 0.84 | 1.91 | 2.45               | 2.51 | 2.06 | 2.59  | 3.19               | 4.26 | 2.75 | 5.10  | 2.62                  | 2.86 | 2.20 | 3.13  |
| AZTt                 | FTC    | MVC    | 0.39               | 2.79 | 1.72 | 2.79               | 1.72 | 2.80 | 2.80  | 3.18               | 2.12 | 4.51 | 4.91  | 3.60                  | 2.09 | 4.79 | 5.81  |
| AZTt                 | RAL    | NFVt   | 0.39               | 1.69 | 2.76 | 1.69               | 2.76 | 2.87 | 2.87  | 2.08               | 3.15 | 4.44 | 4.84  | 2.11                  | 3.23 | 5.85 | 5.90  |
| ddIEC                | TDF    | MVC    | 2.56               | 0.86 | 1.72 | 2.56               | 2.62 | 1.73 | 2.62  | 3.42               | 4.28 | 2.58 | 5.14  | 2.51                  | 4.48 | 2.95 | 4.93  |
| ddIEC                | TDF    | RAL    | 2.56               | 0.86 | 1.69 | 2.56               | 2.66 | 1.69 | 2.66  | 3.42               | 4.25 | 2.55 | 5.11  | 2.51                  | 4.11 | 2.71 | 4.45  |
| d4T                  | ddIEC  | ABCq   | 0.25               | 2.56 | 2.14 | 2.56               | 2.14 | 2.82 | 2.82  | 2.81               | 2.39 | 4.70 | 4.95  | 3.29                  | 2.64 | 3.21 | 6.46  |
| AZTb                 | RAL    | NFVb   | 0.37               | 1.69 | 2.80 | 1.69               | 2.80 | 2.93 | 2.93  | 2.05               | 3.17 | 4.49 | 4.86  | 2.08                  | 3.25 | 5.88 | 5.90  |
| FTC                  | ddlB   | EVG/c  | 2.79               | 0.75 | 1.41 | 2.85               | 2.80 | 1.60 | 2.86  | 3.54               | 4.20 | 2.16 | 4.95  | 3.06                  | 4.28 | 2.25 | 4.63  |
| AZTt                 | RAL    | NFVb   | 0.39               | 1.69 | 2.80 | 1.69               | 2.80 | 2.93 | 2.93  | 2.08               | 3.19 | 4.49 | 4.88  | 2.11                  | 3.28 | 5.88 | 5.94  |

| Regimen <sup>a</sup> |        |        | HIV <sup>ave</sup> |      |      |                    |      |      |       |                    |      |      |       |                       |      |      |       |
|----------------------|--------|--------|--------------------|------|------|--------------------|------|------|-------|--------------------|------|------|-------|-----------------------|------|------|-------|
|                      |        |        | Single drug        |      |      | Loewe <sup>b</sup> |      |      |       | Bliss <sup>c</sup> |      |      |       | DI Index <sup>d</sup> |      |      |       |
| Drug 1               | Drug 2 | Drug 3 | 1                  | 2    | 3    | 1,2                | 1,3  | 2,3  | 1,2,3 | 1,2                | 1,3  | 2,3  | 1,2,3 | 1,2                   | 1,3  | 2,3  | 1,2,3 |
| d4T                  | FTC    | ABCb   | 0.25               | 2.79 | 1.91 | 2.79               | 1.92 | 2.86 | 2.86  | 3.04               | 2.16 | 4.70 | 4.95  | 3.21                  | 2.41 | 2.92 | 5.40  |
| d4T                  | ddIEC  | ENF    | 0.25               | 2.56 | 2.07 | 2.56               | 2.07 | 2.94 | 2.94  | 2.81               | 2.32 | 4.63 | 4.88  | 3.29                  | 2.33 | 4.33 | 6.00  |
| 3TCb                 | ddlfb  | ABCq   | 2.30               | 0.75 | 2.14 | 2.39               | 2.56 | 2.24 | 2.63  | 3.05               | 4.45 | 2.89 | 5.19  | 2.55                  | 2.93 | 2.38 | 3.18  |
| 3TCb                 | ddlfb  | ENF    | 2.30               | 0.75 | 2.07 | 2.39               | 2.63 | 2.24 | 2.71  | 3.05               | 4.37 | 2.82 | 5.12  | 2.55                  | 4.55 | 2.71 | 4.64  |
| 3TCb                 | EVG/c  | MVC    | 2.30               | 1.41 | 1.72 | 2.35               | 2.36 | 1.84 | 2.40  | 3.72               | 4.03 | 3.14 | 5.44  | 4.06                  | 5.28 | 3.20 | 6.69  |
| 3TCb                 | EVG/c  | MVC    | 2.30               | 1.41 | 1.72 | 2.35               | 2.36 | 1.84 | 2.40  | 3.72               | 4.03 | 3.14 | 5.44  | 4.06                  | 5.28 | 3.20 | 6.69  |
| TDF                  | EVG/c  | NFVt   | 0.86               | 1.41 | 2.76 | 1.43               | 2.76 | 2.82 | 2.82  | 2.27               | 3.62 | 4.17 | 5.03  | 2.25                  | 3.16 | 4.61 | 4.97  |
| ENF                  | RAL    | MVC    | 2.07               | 1.69 | 1.72 | 2.29               | 2.26 | 1.94 | 2.37  | 3.76               | 3.79 | 3.41 | 5.48  | 3.96                  | 4.70 | 3.94 | 6.65  |
| ABCb                 | ENF    | EVG/c  | 1.91               | 2.07 | 1.41 | 2.41               | 2.02 | 2.20 | 2.46  | 3.98               | 3.33 | 3.48 | 5.40  | 3.62                  | 3.39 | 3.46 | 5.19  |
| 3TCb                 | TDF    | ABCq   | 2.30               | 0.86 | 2.14 | 2.30               | 2.56 | 2.14 | 2.56  | 3.16               | 4.45 | 3.00 | 5.31  | 2.97                  | 2.93 | 2.11 | 3.52  |
| 3TCb                 | TDF    | ENF    | 2.30               | 0.86 | 2.07 | 2.30               | 2.63 | 2.08 | 2.63  | 3.16               | 4.37 | 2.93 | 5.23  | 2.97                  | 4.55 | 2.62 | 4.94  |
| FTC                  | TDF    | EVG/c  | 2.79               | 0.86 | 1.41 | 2.79               | 2.80 | 1.43 | 2.80  | 3.65               | 4.20 | 2.27 | 5.06  | 3.07                  | 4.28 | 2.24 | 4.62  |
| ddlfb                | EVG/c  | NFVt   | 0.75               | 1.41 | 2.76 | 1.60               | 2.92 | 2.82 | 2.95  | 2.16               | 3.50 | 4.17 | 4.92  | 2.25                  | 3.29 | 4.61 | 5.04  |
| ABCq                 | RAL    | MVC    | 2.14               | 1.69 | 1.72 | 2.26               | 2.23 | 1.94 | 2.33  | 3.83               | 3.87 | 3.41 | 5.55  | 3.68                  | 4.41 | 3.94 | 6.23  |
| ABCq                 | RAL    | MVC    | 2.14               | 1.69 | 1.72 | 2.26               | 2.23 | 1.94 | 2.33  | 3.83               | 3.87 | 3.41 | 5.55  | 3.68                  | 4.41 | 3.94 | 6.23  |
| d4T                  | ABCb   | NFVt   | 0.25               | 1.91 | 2.76 | 1.92               | 2.76 | 2.96 | 2.96  | 2.16               | 3.01 | 4.67 | 4.92  | 2.42                  | 2.92 | 4.36 | 5.06  |
| AZTb                 | ddIEC  | ABCq   | 0.37               | 2.56 | 2.14 | 2.56               | 2.14 | 2.82 | 2.82  | 2.93               | 2.51 | 4.70 | 5.07  | 3.41                  | 3.07 | 3.21 | 6.59  |
| 3TCq                 | ddlfb  | ABCq   | 2.35               | 0.75 | 2.14 | 2.44               | 2.59 | 2.24 | 2.65  | 3.10               | 4.49 | 2.89 | 5.24  | 2.59                  | 2.96 | 2.38 | 3.21  |
| 3TCq                 | ddlfb  | ENF    | 2.35               | 0.75 | 2.07 | 2.44               | 2.67 | 2.24 | 2.74  | 3.10               | 4.42 | 2.82 | 5.17  | 2.59                  | 4.60 | 2.71 | 4.68  |
| AZTt                 | ddIEC  | ABCq   | 0.39               | 2.56 | 2.14 | 2.56               | 2.14 | 2.82 | 2.82  | 2.95               | 2.54 | 4.70 | 5.10  | 3.46                  | 3.13 | 3.21 | 6.66  |
| FTC                  | ddlq   | EVG/c  | 2.79               | 0.84 | 1.41 | 2.86               | 2.80 | 1.62 | 2.87  | 3.63               | 4.20 | 2.25 | 5.04  | 3.10                  | 4.28 | 2.36 | 4.71  |
| 3TCb                 | ddlq   | ABCq   | 2.30               | 0.84 | 2.14 | 2.41               | 2.56 | 2.25 | 2.64  | 3.14               | 4.45 | 2.98 | 5.29  | 2.58                  | 2.93 | 2.40 | 3.20  |
| 3TCq                 | EVG/c  | MVC    | 2.35               | 1.41 | 1.72 | 2.39               | 2.41 | 1.84 | 2.44  | 3.76               | 4.07 | 3.14 | 5.49  | 4.10                  | 5.32 | 3.20 | 6.74  |
| 3TCb                 | ddlq   | ENF    | 2.30               | 0.84 | 2.07 | 2.41               | 2.63 | 2.26 | 2.72  | 3.14               | 4.37 | 2.91 | 5.21  | 2.58                  | 4.55 | 2.79 | 4.71  |
| AZTb                 | FTC    | ABCb   | 0.37               | 2.79 | 1.91 | 2.79               | 1.91 | 2.86 | 2.86  | 3.16               | 2.28 | 4.70 | 5.07  | 3.55                  | 2.84 | 2.92 | 6.33  |
| AZTb                 | ddIEC  | ENF    | 0.37               | 2.56 | 2.07 | 2.56               | 2.07 | 2.94 | 2.94  | 2.93               | 2.44 | 4.63 | 5.00  | 3.41                  | 2.51 | 4.33 | 5.83  |
| 3TCq                 | TDF    | ABCq   | 2.35               | 0.86 | 2.14 | 2.35               | 2.59 | 2.14 | 2.59  | 3.21               | 4.49 | 3.00 | 5.35  | 3.02                  | 2.96 | 2.11 | 3.56  |
| 3TCq                 | TDF    | ENF    | 2.35               | 0.86 | 2.07 | 2.35               | 2.67 | 2.08 | 2.67  | 3.21               | 4.42 | 2.93 | 5.28  | 3.02                  | 4.60 | 2.62 | 4.99  |
| TDF                  | EVG/c  | NFVb   | 0.86               | 1.41 | 2.80 | 1.43               | 2.80 | 2.88 | 2.88  | 2.27               | 3.66 | 4.22 | 5.08  | 2.25                  | 3.20 | 4.65 | 5.02  |
| AZTt                 | FTC    | ABCb   | 0.39               | 2.79 | 1.91 | 2.79               | 1.91 | 2.86 | 2.86  | 3.18               | 2.31 | 4.70 | 5.10  | 3.60                  | 2.91 | 2.92 | 6.39  |
| AZTt                 | ddIEC  | ENF    | 0.39               | 2.56 | 2.07 | 2.56               | 2.07 | 2.94 | 2.94  | 2.95               | 2.46 | 4.63 | 5.02  | 3.46                  | 2.54 | 4.33 | 5.88  |
| ddlfb                | EVG/c  | NFVb   | 0.75               | 1.41 | 2.80 | 1.60               | 2.96 | 2.88 | 3.01  | 2.16               | 3.55 | 4.22 | 4.96  | 2.25                  | 3.33 | 4.65 | 5.09  |
| ddlq                 | EVG/c  | NFVt   | 0.84               | 1.41 | 2.76 | 1.62               | 2.93 | 2.82 | 2.97  | 2.25               | 3.60 | 4.17 | 5.01  | 2.36                  | 3.35 | 4.61 | 5.14  |
| d4T                  | ABCb   | NFVb   | 0.25               | 1.91 | 2.80 | 1.92               | 2.80 | 3.03 | 3.03  | 2.16               | 3.05 | 4.72 | 4.96  | 2.42                  | 2.96 | 4.41 | 5.09  |
| 3TCq                 | ddlq   | ABCq   | 2.35               | 0.84 | 2.14 | 2.45               | 2.59 | 2.25 | 2.66  | 3.19               | 4.49 | 2.98 | 5.33  | 2.62                  | 2.96 | 2.40 | 3.23  |
| AZTb                 | ABCb   | NFVt   | 0.37               | 1.91 | 2.76 | 1.91               | 2.76 | 2.96 | 2.96  | 2.28               | 3.12 | 4.67 | 5.04  | 2.84                  | 3.20 | 4.36 | 5.88  |
| 3TCq                 | ddlq   | ENF    | 2.35               | 0.84 | 2.07 | 2.45               | 2.67 | 2.26 | 2.75  | 3.19               | 4.42 | 2.91 | 5.26  | 2.62                  | 4.60 | 2.79 | 4.75  |
| d4T                  | 3TCb   | ddIEC  | 0.25               | 2.30 | 2.56 | 2.31               | 2.56 | 2.91 | 2.91  | 2.55               | 2.81 | 4.86 | 5.11  | 2.72                  | 3.29 | 3.38 | 6.42  |
| AZTt                 | ABCb   | NFVt   | 0.39               | 1.91 | 2.76 | 1.91               | 2.76 | 2.96 | 2.96  | 2.31               | 3.15 | 4.67 | 5.06  | 2.91                  | 3.23 | 4.36 | 5.93  |
| ddlq                 | EVG/c  | NFVb   | 0.84               | 1.41 | 2.80 | 1.62               | 2.98 | 2.88 | 3.02  | 2.25               | 3.64 | 4.22 | 5.05  | 2.36                  | 3.40 | 4.65 | 5.18  |
| ddIEC                | TDF    | ABCb   | 2.56               | 0.86 | 1.91 | 2.56               | 2.74 | 1.92 | 2.74  | 3.42               | 4.47 | 2.77 | 5.33  | 2.51                  | 3.11 | 1.88 | 2.90  |
| d4T                  | 3TCq   | ddIEC  | 0.25               | 2.35 | 2.56 | 2.35               | 2.56 | 2.92 | 2.92  | 2.60               | 2.81 | 4.91 | 5.16  | 2.77                  | 3.29 | 3.40 | 6.48  |
| d4T                  | FTC    | ABCq   | 0.25               | 2.79 | 2.14 | 2.79               | 2.14 | 2.90 | 2.90  | 3.04               | 2.39 | 4.93 | 5.18  | 3.21                  | 2.64 | 2.97 | 5.70  |
| d4T                  | FTC    | ENF    | 0.25               | 2.79 | 2.07 | 2.79               | 2.07 | 2.99 | 2.99  | 3.04               | 2.32 | 4.86 | 5.11  | 3.21                  | 2.33 | 4.39 | 5.37  |
| FTC                  | ddlfb  | RAL    | 2.79               | 0.75 | 1.69 | 2.85               | 2.82 | 1.83 | 2.88  | 3.54               | 4.48 | 2.43 | 5.22  | 3.06                  | 4.61 | 2.38 | 4.77  |
| AZTb                 | ABCb   | NFVb   | 0.37               | 1.91 | 2.80 | 1.91               | 2.80 | 3.03 | 3.03  | 2.28               | 3.17 | 4.72 | 5.08  | 2.84                  | 3.25 | 4.41 | 5.91  |
| FTC                  | ddlfb  | MVC    | 2.79               | 0.75 | 1.72 | 2.85               | 2.80 | 1.83 | 2.86  | 3.54               | 4.51 | 2.47 | 5.26  | 3.06                  | 4.79 | 2.54 | 5.02  |
| AZTt                 | ABCb   | NFVb   | 0.39               | 1.91 | 2.80 | 1.91               | 2.80 | 3.03 | 3.03  | 2.31               | 3.19 | 4.72 | 5.11  | 2.91                  | 3.28 | 4.41 | 5.96  |
| 3TCb                 | ABCb   | EVG/c  | 2.30               | 1.91 | 1.41 | 2.47               | 2.35 | 2.02 | 2.50  | 4.22               | 3.72 | 3.33 | 5.63  | 2.82                  | 4.06 | 3.39 | 5.29  |
| AZTb                 | 3TCb   | ddIEC  | 0.37               | 2.30 | 2.56 | 2.30               | 2.56 | 2.91 | 2.91  | 2.67               | 2.93 | 4.86 | 5.23  | 2.91                  | 3.40 | 3.38 | 6.12  |
| 3TCb                 | RAL    | MVC    | 2.30               | 1.69 | 1.72 | 2.39               | 2.36 | 1.94 | 2.44  | 3.99               | 4.03 | 3.41 | 5.71  | 4.00                  | 5.28 | 3.94 | 7.06  |
| FTC                  | TDF    | RAL    | 2.79               | 0.86 | 1.69 | 2.79               | 2.82 | 1.69 | 2.82  | 3.65               | 4.48 | 2.55 | 5.34  | 3.07                  | 4.61 | 2.71 | 5.05  |
| AZTt                 | 3TCb   | ddIEC  | 0.39               | 2.30 | 2.56 | 2.30               | 2.56 | 2.91 | 2.91  | 2.70               | 2.95 | 4.86 | 5.26  | 2.95                  | 3.46 | 3.38 | 6.17  |
| ABCb                 | ENF    | RAL    | 1.91               | 2.07 | 1.69 | 2.41               | 2.10 | 2.29 | 2.50  | 3.98               | 3.60 | 3.76 | 5.67  | 3.62                  | 3.45 | 3.96 | 5.49  |
| FTC                  | TDF    | MVC    | 2.79               | 0.86 | 1.72 | 2.79               | 2.80 | 1.73 | 2.80  | 3.65               | 4.51 | 2.58 | 5.37  | 3.07                  | 4.79 | 2.95 | 5.37  |
| TDF                  | RAL    | NFVt   | 0.86               | 1.69 | 2.76 | 1.69               | 2.76 | 2.87 | 2.87  | 2.55               | 3.62 | 4.44 | 5.30  | 2.71                  | 3.16 | 5.85 | 6.15  |
| ABCb                 | ENF    | MVC    | 1.91               | 2.07 | 1.72 | 2.41               | 2.07 | 2.26 | 2.47  | 3.98               | 3.64 | 3.79 | 5.71  | 3.62                  | 4.16 | 4.70 | 6.57  |
| d4T                  | ABCq   | NFVt   | 0.25               | 2.14 | 2.76 | 2.14               | 2.76 | 3.04 | 3.04  | 2.39               | 3.01 | 4.90 | 5.15  | 2.65                  | 2.92 | 4.56 | 5.33  |
| ddlfb                | RAL    | NFVt   | 0.75               | 1.69 | 2.76 | 1.83               | 2.92 | 2.87 | 2.99  | 2.43               | 3.50 | 4.44 | 5.19  | 2.38                  | 3.29 | 5.85 | 5.92  |
| ABCq                 | ENF    | EVG/c  | 2.14               | 2.07 | 1.41 | 2.53               | 2.20 | 2.20 | 2.56  | 4.21               | 3.56 | 3.48 | 5.63  | 3.82                  | 3.62 | 3.46 | 5.41  |
| AZTb                 | 3TCq   | ddIEC  | 0.37               | 2.35 | 2.56 | 2.35               | 2.56 | 2.92 | 2.92  | 2.72               | 2.93 | 4.91 | 5.28  | 2.95                  | 3.40 | 3.40 | 6.18  |
| FTC                  | ddlq   | RAL    | 2.79               | 0.84 | 1.69 | 2.86               | 2.82 | 1.85 | 2.89  | 3.63               | 4.48 | 2.53 | 5.32  | 3.10                  | 4.61 | 2.47 | 4.84  |
| AZTb                 | FTC    | ABCq   | 0.37               | 2.79 | 2.14 | 2.79               | 2.14 | 2.90 | 2.90  | 3.16               | 2.51 | 4.93 | 5.30  | 3.55                  | 3.07 | 2.97 | 6.71  |
| 3TCq                 | ABCb   | EVG/c  | 2.35               | 1.91 | 1.41 | 2.51               | 2.39 | 2.02 | 2.54  | 4.26               | 3.76 | 3.33 | 5.68  | 2.86                  | 4.10 | 3.39 | 5.33  |
| AZTb                 | FTC    | ENF    | 0.37               | 2.79 | 2.07 | 2.79               | 2.07 | 2.99 | 2.99  | 3.16               | 2.44 | 4.86 | 5.23  | 3.55                  | 2.51 | 4.39 | 5.91  |
| FTC                  | ddlq   | MVC    | 2.79               | 0.84 | 1.72 | 2.86               | 2.80 | 1.85 | 2.87  | 3.63               | 4.51 | 2.56 | 5.35  | 3.10                  | 4.79 | 2.64 | 5.10  |
| AZTt                 | 3TCq   | ddIEC  | 0.39               | 2.35 | 2.56 | 2.35               | 2.56 | 2.92 | 2.92  | 2.74               | 2.95 | 4.91 | 5.30  | 2.99                  | 3.46 | 3.40 | 6.22  |
| AZTt                 | FTC    | ABCq   | 0.39               | 2.79 | 2.14 | 2.79               | 2.14 | 2.90 | 2.90  | 3.18               | 2.54 | 4.93 | 5.33  | 3.60                  | 3.13 | 2.97 | 6.77  |
| 3TCq                 | RAL    | MVC    | 2.35               | 1.69 | 1.72 | 2.44               | 2.41 | 1.94 | 2.48  | 4.04               | 4.07 | 3.41 | 5.76  | 4.04                  | 5.32 | 3.94 | 7.10  |
| d4T                  | ENF    | NFVt   | 0.25               | 2.07 | 2.76 | 2.07               | 2.76 | 3.16 | 3.16  | 2.32               | 3.01 | 4.83 | 5.08  | 2.34                  | 2.92 | 5.11 | 5.09  |

| Regimen <sup>a</sup> |        |        | HIV <sup>ave</sup> |      |      |                    |      |      |       |                    |      |      |       |                       |      |      |       |
|----------------------|--------|--------|--------------------|------|------|--------------------|------|------|-------|--------------------|------|------|-------|-----------------------|------|------|-------|
|                      |        |        | Single drug        |      |      | Loewe <sup>b</sup> |      |      |       | Bliss <sup>c</sup> |      |      |       | DI Index <sup>d</sup> |      |      |       |
| Drug 1               | Drug 2 | Drug 3 | 1                  | 2    | 3    | 1,2                | 1,3  | 2,3  | 1,2,3 | 1,2                | 1,3  | 2,3  | 1,2,3 | 1,2                   | 1,3  | 2,3  | 1,2,3 |
| AZTt                 | FTC    | ENF    | 0.39               | 2.79 | 2.07 | 2.79               | 2.07 | 2.99 | 2.99  | 3.18               | 2.46 | 4.86 | 5.25  | 3.60                  | 2.54 | 4.39 | 5.95  |
| d4T                  | ENF    | NFVb   | 0.25               | 2.07 | 2.80 | 2.07               | 2.80 | 3.15 | 3.15  | 2.32               | 3.05 | 4.87 | 5.12  | 2.34                  | 2.96 | 5.17 | 5.13  |
| ddlB                 | RAL    | NFVb   | 0.75               | 1.69 | 2.80 | 1.83               | 2.96 | 2.93 | 3.04  | 2.43               | 3.55 | 4.49 | 5.23  | 2.38                  | 3.33 | 5.88 | 5.96  |
| TDF                  | RAL    | NFVb   | 0.86               | 1.69 | 2.80 | 1.69               | 2.80 | 2.93 | 2.93  | 2.55               | 3.66 | 4.49 | 5.35  | 2.71                  | 3.20 | 5.88 | 6.18  |
| ddlq                 | RAL    | NFVt   | 0.84               | 1.69 | 2.76 | 1.85               | 2.93 | 2.87 | 3.00  | 2.53               | 3.60 | 4.44 | 5.28  | 2.47                  | 3.35 | 5.85 | 6.02  |
| d4T                  | ABCq   | NFVb   | 0.25               | 2.14 | 2.80 | 2.14               | 2.80 | 3.10 | 3.10  | 2.39               | 3.05 | 4.94 | 5.19  | 2.65                  | 2.96 | 4.61 | 5.36  |
| AZTb                 | ABCq   | NFVt   | 0.37               | 2.14 | 2.76 | 2.14               | 2.76 | 3.04 | 3.04  | 2.51               | 3.12 | 4.90 | 5.27  | 3.07                  | 3.20 | 4.56 | 6.20  |
| AZTt                 | ABCq   | NFVt   | 0.39               | 2.14 | 2.76 | 2.14               | 2.76 | 3.04 | 3.04  | 2.54               | 3.15 | 4.90 | 5.29  | 3.13                  | 3.23 | 4.56 | 6.25  |
| ddIEC                | EVG/c  | MVC    | 2.56               | 1.41 | 1.72 | 2.60               | 2.62 | 1.84 | 2.65  | 3.97               | 4.28 | 3.14 | 5.70  | 4.20                  | 4.48 | 3.20 | 6.05  |
| AZTb                 | ENF    | NFVt   | 0.37               | 2.07 | 2.76 | 2.07               | 2.76 | 3.16 | 3.16  | 2.44               | 3.12 | 4.83 | 5.19  | 2.51                  | 3.20 | 5.11 | 5.58  |
| FTC                  | ddlB   | ABCb   | 2.79               | 0.75 | 1.91 | 2.85               | 2.86 | 2.04 | 2.92  | 3.54               | 4.70 | 2.66 | 5.45  | 3.06                  | 2.92 | 2.17 | 3.38  |
| ddIEC                | TDF    | ABCq   | 2.56               | 0.86 | 2.14 | 2.56               | 2.82 | 2.14 | 2.82  | 3.42               | 4.70 | 3.00 | 5.56  | 2.51                  | 3.21 | 2.11 | 2.98  |
| AZTt                 | ENF    | NFVt   | 0.39               | 2.07 | 2.76 | 2.07               | 2.76 | 3.16 | 3.16  | 2.46               | 3.15 | 4.83 | 5.22  | 2.54                  | 3.23 | 5.11 | 5.61  |
| ddlq                 | RAL    | NFVb   | 0.84               | 1.69 | 2.80 | 1.85               | 2.98 | 2.93 | 3.06  | 2.53               | 3.64 | 4.49 | 5.33  | 2.47                  | 3.40 | 5.88 | 6.06  |
| AZTb                 | ENF    | NFVb   | 0.37               | 2.07 | 2.80 | 2.07               | 2.80 | 3.15 | 3.15  | 2.44               | 3.17 | 4.87 | 5.24  | 2.51                  | 3.25 | 5.17 | 5.63  |
| AZTb                 | ABCq   | NFVb   | 0.37               | 2.14 | 2.80 | 2.14               | 2.80 | 3.10 | 3.10  | 2.51               | 3.17 | 4.94 | 5.31  | 3.07                  | 3.25 | 4.61 | 6.22  |
| AZTt                 | ENF    | NFVb   | 0.39               | 2.07 | 2.80 | 2.07               | 2.80 | 3.15 | 3.15  | 2.46               | 3.19 | 4.87 | 5.26  | 2.54                  | 3.28 | 5.17 | 5.66  |
| FTC                  | TDF    | ABCb   | 2.79               | 0.86 | 1.91 | 2.79               | 2.86 | 1.92 | 2.86  | 3.65               | 4.70 | 2.77 | 5.56  | 3.07                  | 2.92 | 1.88 | 3.22  |
| ddIEC                | TDF    | ENF    | 2.56               | 0.86 | 2.07 | 2.56               | 2.94 | 2.08 | 2.94  | 3.42               | 4.63 | 2.93 | 5.49  | 2.51                  | 4.33 | 2.62 | 4.32  |
| d4T                  | 3TCb   | NFVt   | 0.25               | 2.30 | 2.76 | 2.31               | 2.76 | 3.12 | 3.12  | 2.55               | 3.01 | 5.06 | 5.31  | 2.72                  | 2.92 | 4.32 | 5.13  |
| 3TCb                 | ABCb   | RAL    | 2.30               | 1.91 | 1.69 | 2.47               | 2.39 | 2.10 | 2.53  | 4.22               | 3.99 | 3.60 | 5.91  | 2.82                  | 4.00 | 3.45 | 5.06  |
| AZTt                 | ABCq   | NFVb   | 0.39               | 2.14 | 2.80 | 2.14               | 2.80 | 3.10 | 3.10  | 2.54               | 3.19 | 4.94 | 5.34  | 3.13                  | 3.28 | 4.61 | 6.27  |
| 3TCb                 | ABCq   | EVG/c  | 2.30               | 2.14 | 1.41 | 2.56               | 2.35 | 2.20 | 2.58  | 4.45               | 3.72 | 3.56 | 5.86  | 2.93                  | 4.06 | 3.62 | 5.49  |
| 3TCb                 | ENF    | EVG/c  | 2.30               | 2.07 | 1.41 | 2.63               | 2.35 | 2.20 | 2.66  | 4.37               | 3.72 | 3.48 | 5.79  | 4.55                  | 4.06 | 3.46 | 6.15  |
| 3TCb                 | ABCb   | MVC    | 2.30               | 1.91 | 1.72 | 2.47               | 2.36 | 2.07 | 2.51  | 4.22               | 4.03 | 3.64 | 5.94  | 2.82                  | 5.28 | 4.16 | 6.81  |
| FTC                  | ddlq   | ABCb   | 2.79               | 0.84 | 1.91 | 2.86               | 2.86 | 2.06 | 2.92  | 3.63               | 4.70 | 2.75 | 5.54  | 3.10                  | 2.92 | 2.20 | 3.41  |
| ddlB                 | ABCb   | NFVt   | 0.75               | 1.91 | 2.76 | 2.04               | 2.92 | 2.96 | 3.07  | 2.66               | 3.50 | 4.67 | 5.42  | 2.17                  | 3.29 | 4.36 | 4.53  |
| d4T                  | 3TCq   | NFVt   | 0.25               | 2.35 | 2.76 | 2.35               | 2.76 | 3.14 | 3.14  | 2.60               | 3.01 | 5.11 | 5.36  | 2.77                  | 2.92 | 4.35 | 5.18  |
| ABCq                 | ENF    | RAL    | 2.14               | 2.07 | 1.69 | 2.53               | 2.26 | 2.29 | 2.59  | 4.21               | 3.83 | 3.76 | 5.90  | 3.82                  | 3.68 | 3.96 | 5.70  |
| TDF                  | ABCb   | NFVt   | 0.86               | 1.91 | 2.76 | 1.92               | 2.76 | 2.96 | 2.96  | 2.77               | 3.62 | 4.67 | 5.53  | 1.89                  | 3.16 | 4.36 | 4.32  |
| ABCq                 | ENF    | MVC    | 2.14               | 2.07 | 1.72 | 2.53               | 2.23 | 2.26 | 2.57  | 4.21               | 3.87 | 3.79 | 5.94  | 3.82                  | 4.41 | 4.70 | 6.81  |
| 3TCq                 | ABCq   | EVG/c  | 2.35               | 2.14 | 1.41 | 2.59               | 2.39 | 2.20 | 2.61  | 4.49               | 3.76 | 3.56 | 5.91  | 2.96                  | 4.10 | 3.62 | 5.53  |
| 3TCq                 | ABCb   | RAL    | 2.35               | 1.91 | 1.69 | 2.51               | 2.44 | 2.10 | 2.57  | 4.26               | 4.04 | 3.60 | 5.95  | 2.86                  | 4.04 | 3.45 | 5.10  |
| 3TCq                 | ENF    | EVG/c  | 2.35               | 2.07 | 1.41 | 2.67               | 2.39 | 2.20 | 2.69  | 4.42               | 3.76 | 3.48 | 5.83  | 4.60                  | 4.10 | 3.46 | 6.20  |
| d4T                  | 3TCb   | NFVb   | 0.25               | 2.30 | 2.80 | 2.31               | 2.80 | 3.17 | 3.17  | 2.55               | 3.05 | 5.11 | 5.35  | 2.72                  | 2.96 | 4.36 | 5.17  |
| 3TCq                 | ABCb   | MVC    | 2.35               | 1.91 | 1.72 | 2.51               | 2.41 | 2.07 | 2.55  | 4.26               | 4.07 | 3.64 | 5.99  | 2.86                  | 5.32 | 4.16 | 6.85  |
| AZTb                 | 3TCb   | NFVt   | 0.37               | 2.30 | 2.76 | 2.30               | 2.76 | 3.12 | 3.12  | 2.67               | 3.12 | 5.06 | 5.43  | 2.91                  | 3.20 | 4.32 | 5.62  |
| AZTt                 | 3TCb   | NFVt   | 0.39               | 2.30 | 2.76 | 2.30               | 2.76 | 3.12 | 3.12  | 2.70               | 3.15 | 5.06 | 5.45  | 2.95                  | 3.23 | 4.32 | 5.66  |
| ddlB                 | ABCb   | NFVb   | 0.75               | 1.91 | 2.80 | 2.04               | 2.96 | 3.03 | 3.12  | 2.66               | 3.55 | 4.72 | 5.46  | 2.17                  | 3.33 | 4.41 | 4.58  |
| ddlq                 | ABCb   | NFVt   | 0.84               | 1.91 | 2.76 | 2.06               | 2.93 | 2.96 | 3.08  | 2.75               | 3.60 | 4.67 | 5.51  | 2.20                  | 3.35 | 4.36 | 4.59  |
| d4T                  | 3TCq   | NFVb   | 0.25               | 2.35 | 2.80 | 2.35               | 2.80 | 3.20 | 3.20  | 2.60               | 3.05 | 5.15 | 5.40  | 2.77                  | 2.96 | 4.40 | 5.21  |
| TDF                  | ABCb   | NFVb   | 0.86               | 1.91 | 2.80 | 1.92               | 2.80 | 3.03 | 3.03  | 2.77               | 3.66 | 4.72 | 5.57  | 1.89                  | 3.20 | 4.41 | 4.38  |
| AZTb                 | 3TCq   | NFVt   | 0.37               | 2.35 | 2.76 | 2.35               | 2.76 | 3.14 | 3.14  | 2.72               | 3.12 | 5.11 | 5.47  | 2.95                  | 3.20 | 4.35 | 5.67  |
| FTC                  | ddlB   | ABCq   | 2.79               | 0.75 | 2.14 | 2.85               | 2.90 | 2.24 | 2.95  | 3.54               | 4.93 | 2.89 | 5.68  | 3.06                  | 2.97 | 2.38 | 3.45  |
| 3TCb                 | ddIEC  | TDF    | 2.30               | 2.56 | 0.86 | 2.91               | 2.30 | 2.56 | 2.91  | 4.86               | 3.16 | 3.42 | 5.72  | 3.38                  | 2.97 | 2.51 | 3.86  |
| AZTt                 | 3TCq   | NFVt   | 0.39               | 2.35 | 2.76 | 2.35               | 2.76 | 3.14 | 3.14  | 2.74               | 3.15 | 5.11 | 5.50  | 2.99                  | 3.23 | 4.35 | 5.71  |
| AZTb                 | 3TCb   | NFVb   | 0.37               | 2.30 | 2.80 | 2.30               | 2.80 | 3.17 | 3.17  | 2.67               | 3.17 | 5.11 | 5.47  | 2.91                  | 3.25 | 4.36 | 5.66  |
| FTC                  | ddlB   | ENF    | 2.79               | 0.75 | 2.07 | 2.85               | 2.99 | 2.24 | 3.04  | 3.54               | 4.86 | 2.82 | 5.61  | 3.06                  | 4.39 | 2.71 | 4.68  |
| ddIEC                | ABCb   | EVG/c  | 2.56               | 1.91 | 1.41 | 2.74               | 2.60 | 2.02 | 2.77  | 4.47               | 3.97 | 3.33 | 5.89  | 3.11                  | 4.20 | 3.39 | 5.42  |
| ddIEC                | RAL    | MVC    | 2.56               | 1.69 | 1.72 | 2.66               | 2.62 | 1.94 | 2.69  | 4.25               | 4.28 | 3.41 | 5.97  | 4.11                  | 4.48 | 3.94 | 6.39  |
| AZTt                 | 3TCb   | NFVb   | 0.39               | 2.30 | 2.80 | 2.30               | 2.80 | 3.17 | 3.17  | 2.70               | 3.19 | 5.11 | 5.50  | 2.95                  | 3.28 | 4.36 | 5.70  |
| ddlq                 | ABCb   | NFVb   | 0.84               | 1.91 | 2.80 | 2.06               | 2.98 | 3.03 | 3.14  | 2.75               | 3.64 | 4.72 | 5.55  | 2.20                  | 3.40 | 4.41 | 4.64  |
| 3TCq                 | ddIEC  | TDF    | 2.35               | 2.56 | 0.86 | 2.92               | 2.35 | 2.56 | 2.92  | 4.91               | 3.21 | 3.42 | 5.77  | 3.40                  | 3.02 | 2.51 | 3.88  |
| FTC                  | TDF    | ABCq   | 2.79               | 0.86 | 2.14 | 2.79               | 2.90 | 2.14 | 2.90  | 3.65               | 4.93 | 3.00 | 5.79  | 3.07                  | 2.97 | 2.11 | 3.27  |
| FTC                  | TDF    | ENF    | 2.79               | 0.86 | 2.07 | 2.79               | 2.99 | 2.08 | 2.99  | 3.65               | 4.86 | 2.93 | 5.72  | 3.07                  | 4.39 | 2.62 | 4.61  |
| AZTb                 | 3TCq   | NFVb   | 0.37               | 2.35 | 2.80 | 2.35               | 2.80 | 3.20 | 3.20  | 2.72               | 3.17 | 5.15 | 5.52  | 2.95                  | 3.25 | 4.40 | 5.71  |
| FTC                  | ddlq   | ABCq   | 2.79               | 0.84 | 2.14 | 2.86               | 2.90 | 2.25 | 2.96  | 3.63               | 4.93 | 2.98 | 5.77  | 3.10                  | 2.97 | 2.40 | 3.48  |
| AZTt                 | 3TCq   | NFVb   | 0.39               | 2.35 | 2.80 | 2.35               | 2.80 | 3.20 | 3.20  | 2.74               | 3.19 | 5.15 | 5.54  | 2.99                  | 3.28 | 4.40 | 5.74  |
| 3TCb                 | ABCq   | RAL    | 2.30               | 2.14 | 1.69 | 2.56               | 2.39 | 2.26 | 2.61  | 4.45               | 3.99 | 3.83 | 6.13  | 2.93                  | 4.00 | 3.68 | 5.24  |
| 3TCb                 | ENF    | RAL    | 2.30               | 2.07 | 1.69 | 2.63               | 2.39 | 2.29 | 2.68  | 4.37               | 3.99 | 3.76 | 6.06  | 4.55                  | 4.00 | 3.96 | 6.34  |
| FTC                  | EVG/c  | MVC    | 2.79               | 1.41 | 1.72 | 2.80               | 2.80 | 1.84 | 2.82  | 4.20               | 4.51 | 3.14 | 5.93  | 4.28                  | 4.79 | 3.20 | 6.22  |
| FTC                  | ddlq   | ENF    | 2.79               | 0.84 | 2.07 | 2.86               | 2.99 | 2.26 | 3.05  | 3.63               | 4.86 | 2.91 | 5.70  | 3.10                  | 4.39 | 2.79 | 4.74  |
| 3TCb                 | ABCq   | MVC    | 2.30               | 2.14 | 1.72 | 2.56               | 2.36 | 2.23 | 2.59  | 4.45               | 4.03 | 3.87 | 6.17  | 2.93                  | 5.28 | 4.41 | 7.05  |
| 3TCb                 | ENF    | MVC    | 2.30               | 2.07 | 1.72 | 2.63               | 2.36 | 2.26 | 2.66  | 4.37               | 4.03 | 3.79 | 6.10  | 4.55                  | 5.28 | 4.70 | 7.81  |
| ddlB                 | ABCq   | NFVt   | 0.75               | 2.14 | 2.76 | 2.24               | 2.92 | 3.04 | 3.12  | 2.89               | 3.50 | 4.90 | 5.65  | 2.38                  | 3.29 | 4.56 | 4.68  |
| d4T                  | FTC    | ddIEC  | 0.25               | 2.79 | 2.56 | 2.79               | 2.56 | 3.19 | 3.19  | 3.04               | 2.81 | 5.35 | 5.60  | 3.21                  | 3.29 | 3.86 | 6.96  |
| TDF                  | ABCq   | NFVt   | 0.86               | 2.14 | 2.76 | 2.14               | 2.76 | 3.04 | 3.04  | 3.00               | 3.62 | 4.90 | 5.76  | 2.11                  | 3.16 | 4.56 | 4.46  |
| 3TCq                 | ABCq   | RAL    | 2.35               | 2.14 | 1.69 | 2.59               | 2.44 | 2.26 | 2.63  | 4.49               | 4.04 | 3.83 | 6.18  | 2.96                  | 4.04 | 3.68 | 5.28  |
| 3TCq                 | ENF    | RAL    | 2.35               | 2.07 | 1.69 | 2.67               | 2.44 | 2.29 | 2.71  | 4.42               | 4.04 | 3.76 | 6.11  | 4.60                  | 4.04 | 3.96 | 6.39  |
| ddlB                 | ENF    | NFVt   | 0.75               | 2.07 | 2.76 | 2.24               | 2.92 | 3.16 | 3.25  | 2.82               | 3.50 | 4.83 | 5.57  | 2.71                  | 3.29 | 5.11 | 5.41  |

| Regimen <sup>a</sup> |        |        | HIV <sub>ave</sub> |      |      |                    |      |      |       |                    |      |      |       |                       |      |      |       |
|----------------------|--------|--------|--------------------|------|------|--------------------|------|------|-------|--------------------|------|------|-------|-----------------------|------|------|-------|
|                      |        |        | Single drug        |      |      | Loewe <sup>b</sup> |      |      |       | Bliss <sup>c</sup> |      |      |       | DI Index <sup>d</sup> |      |      |       |
| Drug 1               | Drug 2 | Drug 3 | 1                  | 2    | 3    | 1,2                | 1,3  | 2,3  | 1,2,3 | 1,2                | 1,3  | 2,3  | 1,2,3 | 1,2                   | 1,3  | 2,3  | 1,2,3 |
| 3TCq                 | ABCq   | MVC    | 2.35               | 2.14 | 1.72 | 2.59               | 2.41 | 2.23 | 2.61  | 4.49               | 4.07 | 3.87 | 6.22  | 2.96                  | 5.32 | 4.41 | 7.09  |
| 3TCq                 | ENF    | MVC    | 2.35               | 2.07 | 1.72 | 2.67               | 2.41 | 2.26 | 2.70  | 4.42               | 4.07 | 3.79 | 6.14  | 4.60                  | 5.32 | 4.70 | 7.85  |
| TDF                  | ENF    | NFVt   | 0.86               | 2.07 | 2.76 | 2.08               | 2.76 | 3.16 | 3.16  | 2.93               | 3.62 | 4.83 | 5.69  | 2.63                  | 3.16 | 5.11 | 5.29  |
| ddlB                 | ENF    | NFVt   | 0.75               | 2.07 | 2.80 | 2.24               | 2.96 | 3.15 | 3.25  | 2.82               | 3.55 | 4.87 | 5.62  | 2.71                  | 3.33 | 5.17 | 5.45  |
| ddlq                 | ABCq   | NFVt   | 0.84               | 2.14 | 2.76 | 2.25               | 2.93 | 3.04 | 3.13  | 2.98               | 3.60 | 4.90 | 5.74  | 2.41                  | 3.35 | 4.56 | 4.74  |
| ddlB                 | ABCq   | NFVb   | 0.75               | 2.14 | 2.80 | 2.24               | 2.96 | 3.10 | 3.19  | 2.89               | 3.55 | 4.94 | 5.69  | 2.38                  | 3.33 | 4.61 | 4.74  |
| TDF                  | ENF    | NFVb   | 0.86               | 2.07 | 2.80 | 2.08               | 2.80 | 3.15 | 3.15  | 2.93               | 3.66 | 4.87 | 5.73  | 2.63                  | 3.20 | 5.17 | 5.32  |
| TDF                  | ABCq   | NFVb   | 0.86               | 2.14 | 2.80 | 2.14               | 2.80 | 3.10 | 3.10  | 3.00               | 3.66 | 4.94 | 5.80  | 2.11                  | 3.20 | 4.61 | 4.52  |
| AZTb                 | FTC    | ddIEC  | 0.37               | 2.79 | 2.56 | 2.79               | 2.56 | 3.19 | 3.19  | 3.16               | 2.93 | 5.35 | 5.72  | 3.55                  | 3.40 | 3.86 | 7.02  |
| ddlq                 | ENF    | NFVt   | 0.84               | 2.07 | 2.76 | 2.26               | 2.93 | 3.16 | 3.26  | 2.91               | 3.60 | 4.83 | 5.67  | 2.79                  | 3.35 | 5.11 | 5.49  |
| AZTt                 | FTC    | ddIEC  | 0.39               | 2.79 | 2.56 | 2.79               | 2.56 | 3.19 | 3.19  | 3.18               | 2.95 | 5.35 | 5.74  | 3.60                  | 3.46 | 3.86 | 7.07  |
| ddIEC                | ABCq   | EVG/c  | 2.56               | 2.14 | 1.41 | 2.82               | 2.60 | 2.20 | 2.83  | 4.70               | 3.97 | 3.56 | 6.12  | 3.21                  | 4.20 | 3.62 | 5.62  |
| ddIEC                | ABCb   | RAL    | 2.56               | 1.91 | 1.69 | 2.74               | 2.66 | 2.10 | 2.80  | 4.47               | 4.25 | 3.60 | 6.16  | 3.11                  | 4.11 | 3.45 | 5.17  |
| ddIEC                | ABCb   | MVC    | 2.56               | 1.91 | 1.72 | 2.74               | 2.62 | 2.07 | 2.77  | 4.47               | 4.28 | 3.64 | 6.20  | 3.11                  | 4.48 | 4.16 | 6.04  |
| ddlq                 | ENF    | NFVb   | 0.84               | 2.07 | 2.80 | 2.26               | 2.98 | 3.15 | 3.26  | 2.91               | 3.64 | 4.87 | 5.71  | 2.79                  | 3.40 | 5.17 | 5.53  |
| ddlq                 | ABCq   | NFVb   | 0.84               | 2.14 | 2.80 | 2.25               | 2.98 | 3.10 | 3.19  | 2.98               | 3.64 | 4.94 | 5.78  | 2.41                  | 3.40 | 4.61 | 4.79  |
| FTC                  | ABCb   | EVG/c  | 2.79               | 1.91 | 1.41 | 2.86               | 2.80 | 2.02 | 2.87  | 4.70               | 4.20 | 3.33 | 6.12  | 2.92                  | 4.28 | 3.39 | 5.37  |
| ddIEC                | ENF    | EVG/c  | 2.56               | 2.07 | 1.41 | 2.94               | 2.60 | 2.20 | 2.95  | 4.63               | 3.97 | 3.48 | 6.04  | 4.33                  | 4.20 | 3.46 | 6.01  |
| 3TCb                 | ddlB   | NFVt   | 2.30               | 0.75 | 2.76 | 2.39               | 3.12 | 2.92 | 3.20  | 3.05               | 5.06 | 3.50 | 5.81  | 2.55                  | 4.32 | 3.29 | 4.58  |
| 3TCb                 | ABCb   | ENF    | 2.30               | 1.91 | 2.07 | 2.47               | 2.63 | 2.41 | 2.74  | 4.22               | 4.37 | 3.98 | 6.29  | 2.82                  | 4.55 | 3.61 | 5.43  |
| FTC                  | RAL    | MVC    | 2.79               | 1.69 | 1.72 | 2.82               | 2.80 | 1.94 | 2.83  | 4.48               | 4.51 | 3.41 | 6.20  | 4.61                  | 4.79 | 3.94 | 6.84  |
| 3TCb                 | TDF    | NFVt   | 2.30               | 0.86 | 2.76 | 2.30               | 3.12 | 2.76 | 3.12  | 3.16               | 5.06 | 3.62 | 5.92  | 2.97                  | 4.32 | 3.16 | 4.85  |
| d4T                  | ddIEC  | NFVt   | 0.25               | 2.56 | 2.76 | 2.56               | 2.76 | 3.48 | 3.48  | 2.81               | 3.01 | 5.32 | 5.57  | 3.29                  | 2.92 | 4.64 | 6.26  |
| 3TCb                 | ddlB   | NFVt   | 2.35               | 0.75 | 2.76 | 2.44               | 3.14 | 2.92 | 3.21  | 3.10               | 5.11 | 3.50 | 5.85  | 2.59                  | 4.35 | 3.29 | 4.60  |
| ABCb                 | EVG/c  | NFVt   | 1.91               | 1.41 | 2.76 | 2.02               | 2.96 | 2.82 | 2.99  | 3.33               | 4.67 | 4.17 | 6.09  | 3.39                  | 4.36 | 4.61 | 6.30  |
| 3TCb                 | ddlB   | NFVb   | 2.30               | 0.75 | 2.80 | 2.39               | 3.17 | 2.96 | 3.25  | 3.05               | 5.11 | 3.55 | 5.85  | 2.55                  | 4.36 | 3.33 | 4.62  |
| 3TCq                 | TDF    | NFVt   | 2.35               | 0.86 | 2.76 | 2.35               | 3.14 | 2.76 | 3.14  | 3.21               | 5.11 | 3.62 | 5.97  | 3.02                  | 4.35 | 3.16 | 4.89  |
| 3TCq                 | ABCb   | ENF    | 2.35               | 1.91 | 2.07 | 2.51               | 2.67 | 2.41 | 2.77  | 4.26               | 4.42 | 3.98 | 6.33  | 2.86                  | 4.60 | 3.61 | 5.47  |
| 3TCb                 | ddlq   | NFVt   | 2.30               | 0.84 | 2.76 | 2.41               | 3.12 | 2.93 | 3.21  | 3.14               | 5.06 | 3.60 | 5.90  | 2.58                  | 4.32 | 3.35 | 4.63  |
| d4T                  | ddIEC  | NFVb   | 0.25               | 2.56 | 2.80 | 2.56               | 2.80 | 3.53 | 3.53  | 2.81               | 3.05 | 5.36 | 5.61  | 3.29                  | 2.96 | 4.69 | 6.28  |
| 3TCb                 | TDF    | NFVb   | 2.30               | 0.86 | 2.80 | 2.30               | 3.17 | 2.80 | 3.17  | 3.16               | 5.11 | 3.66 | 5.96  | 2.97                  | 4.36 | 3.20 | 4.90  |
| 3TCq                 | ddlB   | NFVb   | 2.35               | 0.75 | 2.80 | 2.44               | 3.20 | 2.96 | 3.27  | 3.10               | 5.15 | 3.55 | 5.90  | 2.59                  | 4.40 | 3.33 | 4.65  |
| AZTb                 | ddIEC  | NFVt   | 0.37               | 2.56 | 2.76 | 2.56               | 2.76 | 3.48 | 3.48  | 2.93               | 3.12 | 5.32 | 5.68  | 3.41                  | 3.20 | 4.64 | 6.35  |
| 3TCq                 | ddlq   | NFVt   | 2.35               | 0.84 | 2.76 | 2.45               | 3.14 | 2.93 | 3.22  | 3.19               | 5.11 | 3.60 | 5.94  | 2.62                  | 4.35 | 3.35 | 4.65  |
| ABCb                 | EVG/c  | NFVb   | 1.91               | 1.41 | 2.80 | 2.02               | 3.03 | 2.88 | 3.05  | 3.33               | 4.72 | 4.22 | 6.13  | 3.39                  | 4.41 | 4.65 | 6.34  |
| d4T                  | FTC    | NFVt   | 0.25               | 2.79 | 2.76 | 2.79               | 2.76 | 3.38 | 3.38  | 3.04               | 3.01 | 5.55 | 5.80  | 3.21                  | 2.92 | 4.99 | 5.77  |
| AZTt                 | ddIEC  | NFVt   | 0.39               | 2.56 | 2.76 | 2.56               | 2.76 | 3.48 | 3.48  | 2.95               | 3.15 | 5.32 | 5.71  | 3.46                  | 3.23 | 4.64 | 6.39  |
| 3TCb                 | ddlq   | NFVb   | 2.30               | 0.84 | 2.80 | 2.41               | 3.17 | 2.98 | 3.25  | 3.14               | 5.11 | 3.64 | 5.94  | 2.58                  | 4.36 | 3.40 | 4.68  |
| 3TCb                 | ddIEC  | EVG/c  | 2.30               | 2.56 | 1.41 | 2.91               | 2.35 | 2.60 | 2.92  | 4.86               | 3.72 | 3.97 | 6.28  | 3.38                  | 4.06 | 4.20 | 6.03  |
| 3TCq                 | TDF    | NFVb   | 2.35               | 0.86 | 2.80 | 2.35               | 3.20 | 2.80 | 3.20  | 3.21               | 5.15 | 3.66 | 6.01  | 3.02                  | 4.40 | 3.20 | 4.93  |
| ddIEC                | ABCq   | RAL    | 2.56               | 2.14 | 1.69 | 2.82               | 2.66 | 2.26 | 2.86  | 4.70               | 4.25 | 3.83 | 6.39  | 3.21                  | 4.11 | 3.68 | 5.35  |
| AZTb                 | ddIEC  | NFVb   | 0.37               | 2.56 | 2.80 | 2.56               | 2.80 | 3.53 | 3.53  | 2.93               | 3.17 | 5.36 | 5.73  | 3.41                  | 3.25 | 4.69 | 6.38  |
| FTC                  | ABCq   | EVG/c  | 2.79               | 2.14 | 1.41 | 2.90               | 2.80 | 2.20 | 2.91  | 4.93               | 4.20 | 3.56 | 6.35  | 2.97                  | 4.28 | 3.62 | 5.57  |
| 3TCq                 | ddIEC  | EVG/c  | 2.35               | 2.56 | 1.41 | 2.92               | 2.39 | 2.60 | 2.94  | 4.91               | 3.76 | 3.97 | 6.32  | 3.40                  | 4.10 | 4.20 | 6.07  |
| ddIEC                | ABCq   | MVC    | 2.56               | 2.14 | 1.72 | 2.82               | 2.62 | 2.23 | 2.84  | 4.70               | 4.28 | 3.87 | 6.43  | 3.21                  | 4.48 | 4.41 | 6.27  |
| ddIEC                | ABCq   | MVC    | 2.56               | 2.14 | 1.72 | 2.82               | 2.62 | 2.23 | 2.84  | 4.70               | 4.28 | 3.87 | 6.43  | 3.21                  | 4.48 | 4.41 | 6.27  |
| 3TCq                 | ddlq   | NFVb   | 2.35               | 0.84 | 2.80 | 2.45               | 3.20 | 2.98 | 3.28  | 3.19               | 5.15 | 3.64 | 5.99  | 2.62                  | 4.40 | 3.40 | 4.71  |
| FTC                  | ENF    | EVG/c  | 2.79               | 2.07 | 1.41 | 2.99               | 2.80 | 2.20 | 3.00  | 4.86               | 4.20 | 3.48 | 6.28  | 4.39                  | 4.28 | 3.46 | 6.02  |
| FTC                  | ABCb   | RAL    | 2.79               | 1.91 | 1.69 | 2.86               | 2.82 | 2.10 | 2.89  | 4.70               | 4.48 | 3.60 | 6.39  | 2.92                  | 4.61 | 3.45 | 5.50  |
| AZTt                 | ddIEC  | NFVb   | 0.39               | 2.56 | 2.80 | 2.56               | 2.80 | 3.53 | 3.53  | 2.95               | 3.19 | 5.36 | 5.75  | 3.46                  | 3.28 | 4.69 | 6.42  |
| d4T                  | FTC    | NFVb   | 0.25               | 2.79 | 2.80 | 2.79               | 2.80 | 3.44 | 3.44  | 3.04               | 3.05 | 5.59 | 5.84  | 3.21                  | 2.96 | 5.04 | 5.80  |
| ddIEC                | ENF    | RAL    | 2.56               | 2.07 | 1.69 | 2.94               | 2.66 | 2.29 | 2.97  | 4.63               | 4.25 | 3.76 | 6.32  | 4.33                  | 4.11 | 3.96 | 6.17  |
| FTC                  | ABCb   | MVC    | 2.79               | 1.91 | 1.72 | 2.86               | 2.80 | 2.07 | 2.87  | 4.70               | 4.51 | 3.64 | 6.43  | 2.92                  | 4.79 | 4.16 | 6.23  |
| AZTb                 | FTC    | NFVt   | 0.37               | 2.79 | 2.76 | 2.79               | 2.76 | 3.38 | 3.38  | 3.16               | 3.12 | 5.55 | 5.91  | 3.55                  | 3.20 | 4.99 | 6.60  |
| ddIEC                | ENF    | MVC    | 2.56               | 2.07 | 1.72 | 2.94               | 2.62 | 2.26 | 2.95  | 4.63               | 4.28 | 3.79 | 6.35  | 4.33                  | 4.48 | 4.70 | 7.00  |
| 3TCb                 | ABCq   | ENF    | 2.30               | 2.14 | 2.07 | 2.56               | 2.63 | 2.53 | 2.80  | 4.45               | 4.37 | 4.21 | 6.52  | 2.93                  | 4.55 | 3.82 | 5.60  |
| AZTt                 | FTC    | NFVt   | 0.39               | 2.79 | 2.76 | 2.79               | 2.76 | 3.38 | 3.38  | 3.18               | 3.15 | 5.55 | 5.94  | 3.60                  | 3.23 | 4.99 | 6.64  |
| ABCq                 | EVG/c  | NFVt   | 2.14               | 1.41 | 2.76 | 2.20               | 3.04 | 2.82 | 3.05  | 3.56               | 4.90 | 4.17 | 6.31  | 3.62                  | 4.56 | 4.61 | 6.52  |
| ABCb                 | RAL    | NFVt   | 1.91               | 1.69 | 2.76 | 2.10               | 2.96 | 2.87 | 3.01  | 3.60               | 4.67 | 4.44 | 6.36  | 3.45                  | 4.36 | 5.85 | 7.36  |
| 3TCq                 | ABCq   | ENF    | 2.35               | 2.14 | 2.07 | 2.59               | 2.67 | 2.53 | 2.82  | 4.49               | 4.42 | 4.21 | 6.56  | 2.96                  | 4.60 | 3.82 | 5.64  |
| FTC                  | ddIEC  | TDF    | 2.79               | 2.56 | 0.86 | 3.19               | 2.79 | 2.56 | 3.19  | 5.35               | 3.65 | 3.42 | 6.21  | 3.86                  | 3.07 | 2.51 | 3.85  |
| AZTb                 | FTC    | NFVb   | 0.37               | 2.79 | 2.80 | 2.79               | 2.80 | 3.44 | 3.44  | 3.16               | 3.17 | 5.59 | 5.96  | 3.55                  | 3.25 | 5.04 | 6.64  |
| ENF                  | EVG/c  | NFVt   | 2.07               | 1.41 | 2.76 | 2.20               | 3.16 | 2.82 | 3.18  | 3.48               | 4.83 | 4.17 | 6.24  | 3.46                  | 5.11 | 4.61 | 6.78  |
| AZTt                 | FTC    | NFVb   | 0.39               | 2.79 | 2.80 | 2.79               | 2.80 | 3.44 | 3.44  | 3.18               | 3.19 | 5.59 | 5.98  | 3.60                  | 3.28 | 5.04 | 6.68  |
| ENF                  | EVG/c  | NFVb   | 2.07               | 1.41 | 2.80 | 2.20               | 3.15 | 2.88 | 3.18  | 3.48               | 4.87 | 4.22 | 6.29  | 3.46                  | 5.17 | 4.65 | 6.83  |
| ABCb                 | RAL    | NFVb   | 1.91               | 1.69 | 2.80 | 2.10               | 3.03 | 2.93 | 3.08  | 3.60               | 4.72 | 4.49 | 6.40  | 3.45                  | 4.41 | 5.88 | 7.40  |
| ABCq                 | EVG/c  | NFVb   | 2.14               | 1.41 | 2.80 | 2.20               | 3.10 | 2.88 | 3.12  | 3.56               | 4.94 | 4.22 | 6.36  | 3.62                  | 4.61 | 4.65 | 6.57  |
| AZTb                 | d4T    | NVP    | 0.37               | 0.25 | 4.43 | 0.45               | 4.43 | 4.43 | 4.43  | 0.62               | 4.80 | 4.68 | 5.05  | 0.45                  | 5.28 | 4.90 | 5.69  |
| 3TCb                 | ddIEC  | RAL    | 2.30               | 2.56 | 1.69 | 2.91               | 2.39 | 2.66 | 2.94  | 4.86               | 3.99 | 4.25 | 6.55  | 3.38                  | 4.00 | 4.11 | 5.64  |
| AZTt                 | d4T    | NVP    | 0.39               | 0.25 | 4.43 | 0.47               | 4.43 | 4.43 | 4.43  | 0.64               | 4.83 | 4.68 | 5.07  | 0.47                  | 5.33 | 4.90 | 5.74  |



| Regimen <sup>a</sup> |        |        | IIP <sub>ave</sub> |      |      |                    |      |      |       |                    |      |      |       |                       |      |      |       |
|----------------------|--------|--------|--------------------|------|------|--------------------|------|------|-------|--------------------|------|------|-------|-----------------------|------|------|-------|
|                      |        |        | Single drug        |      |      | Loewe <sup>b</sup> |      |      |       | Bliss <sup>c</sup> |      |      |       | DI Index <sup>d</sup> |      |      |       |
| Drug 1               | Drug 2 | Drug 3 | 1                  | 2    | 3    | 1,2                | 1,3  | 2,3  | 1,2,3 | 1,2                | 1,3  | 2,3  | 1,2,3 | 1,2                   | 1,3  | 2,3  | 1,2,3 |
| 3TCb                 | ddIEC  | MVC    | 2.30               | 2.56 | 1.72 | 2.91               | 2.36 | 2.62 | 2.92  | 4.86               | 4.03 | 4.28 | 6.59  | 3.38                  | 5.28 | 4.48 | 7.12  |
| FTC                  | ABCq   | RAL    | 2.79               | 2.14 | 1.69 | 2.90               | 2.82 | 2.26 | 2.92  | 4.93               | 4.48 | 3.83 | 6.62  | 2.97                  | 4.61 | 3.68 | 5.68  |
| 3TCq                 | ddIEC  | RAL    | 2.35               | 2.56 | 1.69 | 2.92               | 2.44 | 2.66 | 2.96  | 4.91               | 4.04 | 4.25 | 6.60  | 3.40                  | 4.04 | 4.11 | 5.68  |
| FTC                  | ENF    | RAL    | 2.79               | 2.07 | 1.69 | 2.99               | 2.82 | 2.29 | 3.01  | 4.86               | 4.48 | 3.76 | 6.55  | 4.39                  | 4.61 | 3.96 | 6.50  |
| FTC                  | ABCq   | MVC    | 2.79               | 2.14 | 1.72 | 2.90               | 2.80 | 2.23 | 2.91  | 4.93               | 4.51 | 3.87 | 6.66  | 2.97                  | 4.79 | 4.41 | 6.46  |
| ddIEC                | ABCb   | ENF    | 2.56               | 1.91 | 2.07 | 2.74               | 2.94 | 2.41 | 3.02  | 4.47               | 4.63 | 3.98 | 6.54  | 3.11                  | 4.33 | 3.61 | 5.25  |
| 3TCq                 | ddIEC  | MVC    | 2.35               | 2.56 | 1.72 | 2.92               | 2.41 | 2.62 | 2.94  | 4.91               | 4.07 | 4.28 | 6.63  | 3.40                  | 5.32 | 4.48 | 7.18  |
| FTC                  | ENF    | MVC    | 2.79               | 2.07 | 1.72 | 2.99               | 2.80 | 2.26 | 3.00  | 4.86               | 4.51 | 3.79 | 6.58  | 4.39                  | 4.79 | 4.70 | 7.22  |
| 3TCb                 | EVG/c  | NFVt   | 2.30               | 1.41 | 2.76 | 2.35               | 3.12 | 2.82 | 3.14  | 3.72               | 5.06 | 4.17 | 6.48  | 4.06                  | 4.32 | 4.61 | 6.69  |
| ddIEC                | TDF    | NFVt   | 2.56               | 0.86 | 2.76 | 2.56               | 3.48 | 2.76 | 3.48  | 3.42               | 5.32 | 3.62 | 6.18  | 2.51                  | 4.64 | 3.16 | 4.60  |
| ABCq                 | RAL    | NFVt   | 2.14               | 1.69 | 2.76 | 2.26               | 3.04 | 2.87 | 3.07  | 3.83               | 4.90 | 4.44 | 6.59  | 3.68                  | 4.56 | 5.85 | 7.60  |
| 3TCq                 | EVG/c  | NFVt   | 2.35               | 1.41 | 2.76 | 2.39               | 3.14 | 2.82 | 3.15  | 3.76               | 5.11 | 4.17 | 6.52  | 4.10                  | 4.35 | 4.61 | 6.73  |
| 3TCb                 | EVG/c  | NFVb   | 2.30               | 1.41 | 2.80 | 2.35               | 3.17 | 2.88 | 3.19  | 3.72               | 5.11 | 4.22 | 6.52  | 4.06                  | 4.36 | 4.65 | 6.73  |
| ENF                  | RAL    | NFVt   | 2.07               | 1.69 | 2.76 | 2.29               | 3.16 | 2.87 | 3.20  | 3.76               | 4.83 | 4.44 | 6.51  | 3.96                  | 5.11 | 5.85 | 7.99  |
| FTC                  | ddIb   | NFVt   | 2.79               | 0.75 | 2.76 | 2.85               | 3.38 | 2.92 | 3.44  | 3.54               | 5.55 | 3.50 | 6.29  | 3.06                  | 4.99 | 3.29 | 5.14  |
| ddIEC                | TDF    | NFVb   | 2.56               | 0.86 | 2.80 | 2.56               | 3.53 | 2.80 | 3.53  | 3.42               | 5.36 | 3.66 | 6.22  | 2.51                  | 4.69 | 3.20 | 4.65  |
| ENF                  | RAL    | NFVb   | 2.07               | 1.69 | 2.80 | 2.29               | 3.15 | 2.93 | 3.20  | 3.76               | 4.87 | 4.49 | 6.56  | 3.96                  | 5.17 | 5.88 | 8.06  |
| 3TCb                 | ddIEC  | ABCb   | 2.30               | 2.56 | 1.91 | 2.91               | 2.47 | 2.74 | 2.99  | 4.86               | 4.22 | 4.47 | 6.78  | 3.38                  | 2.82 | 3.11 | 3.81  |
| ABCq                 | RAL    | NFVb   | 2.14               | 1.69 | 2.80 | 2.26               | 3.10 | 2.93 | 3.14  | 3.83               | 4.94 | 4.49 | 6.63  | 3.68                  | 4.61 | 5.88 | 7.64  |
| 3TCq                 | EVG/c  | NFVb   | 2.35               | 1.41 | 2.80 | 2.39               | 3.20 | 2.88 | 3.21  | 3.76               | 5.15 | 4.22 | 6.57  | 4.10                  | 4.40 | 4.65 | 6.78  |
| FTC                  | TDF    | NFVt   | 2.79               | 0.86 | 2.76 | 2.79               | 3.38 | 2.76 | 3.38  | 3.65               | 5.55 | 3.62 | 6.41  | 3.07                  | 4.99 | 3.16 | 5.05  |
| FTC                  | ABCb   | ENF    | 2.79               | 1.91 | 2.07 | 2.86               | 2.99 | 2.41 | 3.04  | 4.70               | 4.86 | 3.98 | 6.77  | 2.92                  | 4.39 | 3.61 | 5.14  |
| 3TCq                 | ddIEC  | ABCb   | 2.35               | 2.56 | 1.91 | 2.92               | 2.51 | 2.74 | 3.00  | 4.91               | 4.26 | 4.47 | 6.82  | 3.40                  | 2.86 | 3.11 | 3.83  |
| FTC                  | ddIb   | NFVb   | 2.79               | 0.75 | 2.80 | 2.85               | 3.44 | 2.96 | 3.49  | 3.54               | 5.59 | 3.55 | 6.34  | 3.06                  | 5.04 | 3.33 | 5.19  |
| FTC                  | ddlq   | NFVt   | 2.79               | 0.84 | 2.76 | 2.86               | 3.38 | 2.93 | 3.45  | 3.63               | 5.55 | 3.60 | 6.39  | 3.10                  | 4.99 | 3.35 | 5.19  |
| ddIEC                | ABCq   | ENF    | 2.56               | 2.14 | 2.07 | 2.82               | 2.94 | 2.53 | 3.07  | 4.70               | 4.63 | 4.21 | 6.77  | 3.21                  | 4.33 | 3.82 | 5.41  |
| d4T                  | ddIb   | NVP    | 0.25               | 0.75 | 4.43 | 0.82               | 4.43 | 4.45 | 4.45  | 0.99               | 4.68 | 5.18 | 5.43  | 1.34                  | 4.90 | 5.05 | 5.94  |
| FTC                  | TDF    | NFVb   | 2.79               | 0.86 | 2.80 | 2.79               | 3.44 | 2.80 | 3.44  | 3.65               | 5.59 | 3.66 | 6.45  | 3.07                  | 5.04 | 3.20 | 5.10  |
| 3TCb                 | RAL    | NFVt   | 2.30               | 1.69 | 2.76 | 2.39               | 3.12 | 2.87 | 3.15  | 3.99               | 5.06 | 4.44 | 6.75  | 4.00                  | 4.32 | 5.85 | 7.66  |
| FTC                  | ddlq   | NFVb   | 2.79               | 0.84 | 2.80 | 2.86               | 3.44 | 2.98 | 3.50  | 3.63               | 5.59 | 3.64 | 6.43  | 3.10                  | 5.04 | 3.40 | 5.24  |
| 3TCq                 | RAL    | NFVt   | 2.35               | 1.69 | 2.76 | 2.44               | 3.14 | 2.87 | 3.17  | 4.04               | 5.11 | 4.44 | 6.79  | 4.04                  | 4.35 | 5.85 | 7.71  |
| FTC                  | ddIEC  | EVG/c  | 2.79               | 2.56 | 1.41 | 3.19               | 2.80 | 2.60 | 3.20  | 5.35               | 4.20 | 3.97 | 6.76  | 3.86                  | 4.28 | 4.20 | 6.27  |
| d4T                  | TDF    | NVP    | 0.25               | 0.86 | 4.43 | 0.87               | 4.43 | 4.43 | 4.43  | 1.11               | 4.68 | 5.29 | 5.54  | 1.67                  | 4.90 | 5.32 | 6.30  |
| d4T                  | ddlq   | NVP    | 0.25               | 0.84 | 4.43 | 0.90               | 4.43 | 4.46 | 4.46  | 1.09               | 4.68 | 5.27 | 5.52  | 1.45                  | 4.90 | 5.12 | 6.09  |
| ABCb                 | ENF    | NFVt   | 1.91               | 2.07 | 2.76 | 2.41               | 2.96 | 3.16 | 3.25  | 3.98               | 4.67 | 4.83 | 6.74  | 3.62                  | 4.36 | 5.11 | 6.54  |
| 3TCb                 | RAL    | NFVb   | 2.30               | 1.69 | 2.80 | 2.39               | 3.17 | 2.93 | 3.20  | 3.99               | 5.11 | 4.49 | 6.79  | 4.00                  | 4.36 | 5.88 | 7.71  |
| AZTb                 | ddIb   | NVP    | 0.37               | 0.75 | 4.43 | 0.83               | 4.43 | 4.45 | 4.45  | 1.11               | 4.80 | 5.18 | 5.55  | 1.51                  | 5.28 | 5.05 | 6.28  |
| AZTt                 | ddIb   | NVP    | 0.39               | 0.75 | 4.43 | 0.84               | 4.43 | 4.45 | 4.45  | 1.14               | 4.83 | 5.18 | 5.57  | 1.55                  | 5.33 | 5.05 | 6.32  |
| 3TCb                 | ddIEC  | ABCq   | 2.30               | 2.56 | 2.14 | 2.91               | 2.56 | 2.82 | 3.03  | 4.86               | 4.45 | 4.70 | 7.01  | 3.38                  | 2.93 | 3.21 | 3.89  |
| ABCb                 | ENF    | NFVb   | 1.91               | 2.07 | 2.80 | 2.41               | 3.03 | 3.15 | 3.26  | 3.98               | 4.72 | 4.87 | 6.79  | 3.62                  | 4.41 | 5.17 | 6.58  |
| 3TCq                 | RAL    | NFVb   | 2.35               | 1.69 | 2.80 | 2.44               | 3.20 | 2.93 | 3.22  | 4.04               | 5.15 | 4.49 | 6.84  | 4.04                  | 4.40 | 5.88 | 7.75  |
| 3TCb                 | ddIEC  | ENF    | 2.30               | 2.56 | 2.07 | 2.91               | 2.63 | 2.94 | 3.13  | 4.86               | 4.37 | 4.63 | 6.93  | 3.38                  | 4.55 | 4.33 | 6.04  |
| FTC                  | ABCq   | ENF    | 2.79               | 2.14 | 2.07 | 2.90               | 2.99 | 2.53 | 3.07  | 4.93               | 4.86 | 4.21 | 7.00  | 2.97                  | 4.39 | 3.82 | 5.29  |
| 3TCq                 | ddIEC  | ABCq   | 2.35               | 2.56 | 2.14 | 2.92               | 2.59 | 2.82 | 3.04  | 4.91               | 4.49 | 4.70 | 7.05  | 3.40                  | 2.96 | 3.21 | 3.91  |
| AZTb                 | TDF    | NVP    | 0.37               | 0.86 | 4.43 | 0.87               | 4.43 | 4.43 | 4.43  | 1.23               | 4.80 | 5.29 | 5.66  | 1.92                  | 5.28 | 5.32 | 6.69  |
| AZTb                 | ddlq   | NVP    | 0.37               | 0.84 | 4.43 | 0.91               | 4.43 | 4.46 | 4.46  | 1.21               | 4.80 | 5.27 | 5.64  | 1.61                  | 5.28 | 5.12 | 6.43  |
| AZTt                 | TDF    | NVP    | 0.39               | 0.86 | 4.43 | 0.87               | 4.43 | 4.43 | 4.43  | 1.25               | 4.83 | 5.29 | 5.68  | 1.99                  | 5.33 | 5.32 | 6.74  |
| 3TCq                 | ddIEC  | ENF    | 2.35               | 2.56 | 2.07 | 2.92               | 2.67 | 2.94 | 3.14  | 4.91               | 4.42 | 4.63 | 6.98  | 3.40                  | 4.60 | 4.33 | 6.08  |
| AZTt                 | ddlq   | NVP    | 0.39               | 0.84 | 4.43 | 0.92               | 4.43 | 4.46 | 4.46  | 1.23               | 4.83 | 5.27 | 5.66  | 1.66                  | 5.33 | 5.12 | 6.47  |
| 3TCb                 | ABCb   | NFVt   | 2.30               | 1.91 | 2.76 | 2.47               | 3.12 | 2.96 | 3.19  | 4.22               | 5.06 | 4.67 | 6.98  | 2.82                  | 4.32 | 4.36 | 5.43  |
| ddIEC                | EVG/c  | NFVt   | 2.56               | 1.41 | 2.76 | 2.60               | 3.48 | 2.82 | 3.49  | 3.97               | 5.32 | 4.17 | 6.73  | 4.20                  | 4.64 | 4.61 | 6.85  |
| 3TCq                 | ABCb   | NFVt   | 2.35               | 1.91 | 2.76 | 2.51               | 3.14 | 2.96 | 3.21  | 4.26               | 5.11 | 4.67 | 7.02  | 2.86                  | 4.35 | 4.36 | 5.45  |
| FTC                  | ddIEC  | RAL    | 2.79               | 2.56 | 1.69 | 3.19               | 2.82 | 2.66 | 3.21  | 5.35               | 4.48 | 4.25 | 7.04  | 3.86                  | 4.61 | 4.11 | 6.23  |
| ABCq                 | ENF    | NFVt   | 2.14               | 2.07 | 2.76 | 2.53               | 3.04 | 3.16 | 3.28  | 4.21               | 4.90 | 4.83 | 6.97  | 3.82                  | 4.56 | 5.11 | 6.74  |
| 3TCb                 | ABCb   | NFVb   | 2.30               | 1.91 | 2.80 | 2.47               | 3.17 | 3.03 | 3.24  | 4.22               | 5.11 | 4.72 | 7.02  | 2.82                  | 4.36 | 4.41 | 5.48  |
| FTC                  | ddIEC  | MVC    | 2.79               | 2.56 | 1.72 | 3.19               | 2.80 | 2.62 | 3.20  | 5.35               | 4.51 | 4.28 | 7.07  | 3.86                  | 4.79 | 4.48 | 6.67  |
| ddIEC                | EVG/c  | NFVb   | 2.56               | 1.41 | 2.80 | 2.60               | 3.53 | 2.88 | 3.53  | 3.97               | 5.36 | 4.22 | 6.78  | 4.20                  | 4.69 | 4.65 | 6.89  |
| ABCq                 | ENF    | NFVb   | 2.14               | 2.07 | 2.80 | 2.53               | 3.10 | 3.15 | 3.31  | 4.21               | 4.94 | 4.87 | 7.01  | 3.82                  | 4.61 | 5.17 | 6.79  |
| 3TCq                 | ABCb   | NFVb   | 2.35               | 1.91 | 2.80 | 2.51               | 3.20 | 3.03 | 3.27  | 4.26               | 5.15 | 4.72 | 7.06  | 2.86                  | 4.40 | 4.41 | 5.51  |
| FTC                  | EVG/c  | NFVt   | 2.79               | 1.41 | 2.76 | 2.80               | 3.38 | 2.82 | 3.39  | 4.20               | 5.55 | 4.17 | 6.96  | 4.28                  | 4.99 | 4.61 | 7.07  |
| 3TCb                 | ABCq   | NFVt   | 2.30               | 2.14 | 2.76 | 2.56               | 3.12 | 3.04 | 3.23  | 4.45               | 5.06 | 4.90 | 7.20  | 2.93                  | 4.32 | 4.56 | 5.58  |
| FTC                  | EVG/c  | NFVb   | 2.79               | 1.41 | 2.80 | 2.80               | 3.44 | 2.88 | 3.45  | 4.20               | 5.59 | 4.22 | 7.01  | 4.28                  | 5.04 | 4.65 | 7.12  |
| 3TCb                 | ENF    | NFVt   | 2.30               | 2.07 | 2.76 | 2.63               | 3.12 | 3.16 | 3.34  | 4.37               | 5.06 | 4.83 | 7.13  | 4.55                  | 4.32 | 5.11 | 7.05  |
| 3TCq                 | ABCq   | NFVt   | 2.35               | 2.14 | 2.76 | 2.59               | 3.14 | 3.04 | 3.24  | 4.49               | 5.11 | 4.90 | 7.25  | 2.96                  | 4.35 | 4.56 | 5.60  |
| ddIb                 | TDF    | NVP    | 0.75               | 0.86 | 4.43 | 1.06               | 4.45 | 4.43 | 4.45  | 1.61               | 5.18 | 5.29 | 6.04  | 1.03                  | 5.05 | 5.32 | 5.79  |
| FTC                  | ddIEC  | ABCb   | 2.79               | 2.56 | 1.91 | 3.19               | 2.86 | 2.74 | 3.23  | 5.35               | 4.70 | 4.47 | 7.26  | 3.86                  | 2.92 | 3.11 | 4.03  |
| ddIEC                | RAL    | NFVt   | 2.56               | 1.69 | 2.76 | 2.66               | 3.48 | 2.87 | 3.50  | 4.25               | 5.32 | 4.44 | 7.00  | 4.11                  | 4.64 | 5.85 | 7.77  |
| 3TCq                 | ENF    | NFVt   | 2.35               | 2.07 | 2.76 | 2.67               | 3.14 | 3.16 | 3.35  | 4.42               | 5.11 | 4.83 | 7.18  | 4.60                  | 4.35 | 5.11 | 7.09  |
| 3TCb                 | ENF    | NFVb   | 2.30               | 2.07 | 2.80 | 2.63               | 3.17 | 3.15 | 3.35  | 4.37               | 5.11 | 4.87 | 7.18  | 4.55                  | 4.36 | 5.17 | 7.09  |
| d4T                  | NVP    | EVG/c  | 0.25               | 4.43 | 1.41 | 4.43               | 1.42 | 4.43 | 4.43  | 4.68               | 1.66 | 5.85 | 6.10  | 4.90                  | 1.69 | 7.01 | 7.35  |

| Regimen <sup>a</sup> |        |        | <i>IIP</i> <sub>ave</sub> |      |      |                    |      |      |       |                    |      |      |       |                              |      |      |       |
|----------------------|--------|--------|---------------------------|------|------|--------------------|------|------|-------|--------------------|------|------|-------|------------------------------|------|------|-------|
|                      |        |        | Single drug               |      |      | Loewe <sup>b</sup> |      |      |       | Bliss <sup>c</sup> |      |      |       | <i>DI</i> Index <sup>d</sup> |      |      |       |
| Drug 1               | Drug 2 | Drug 3 | 1                         | 2    | 3    | 1,2                | 1,3  | 2,3  | 1,2,3 | 1,2                | 1,3  | 2,3  | 1,2,3 | 1,2                          | 1,3  | 2,3  | 1,2,3 |
| 3TCb                 | ABCq   | NFVb   | 2.30                      | 2.14 | 2.80 | 2.56               | 3.17 | 3.10 | 3.28  | 4.45               | 5.11 | 4.94 | 7.25  | 2.93                         | 4.36 | 4.61 | 5.63  |
| ddlq                 | TDF    | NVP    | 0.84                      | 0.86 | 4.43 | 1.10               | 4.46 | 4.43 | 4.46  | 1.70               | 5.27 | 5.29 | 6.13  | 1.07                         | 5.12 | 5.32 | 5.86  |
| ddIEC                | RAL    | NFVb   | 2.56                      | 1.69 | 2.80 | 2.66               | 3.53 | 2.93 | 3.54  | 4.25               | 5.36 | 4.49 | 7.05  | 4.11                         | 4.69 | 5.88 | 7.81  |
| 3TCq                 | ABCq   | NFVb   | 2.35                      | 2.14 | 2.80 | 2.59               | 3.20 | 3.10 | 3.30  | 4.49               | 5.15 | 4.94 | 7.29  | 2.96                         | 4.40 | 4.61 | 5.66  |
| 3TCq                 | ENF    | NFVb   | 2.35                      | 2.07 | 2.80 | 2.67               | 3.20 | 3.15 | 3.37  | 4.42               | 5.15 | 4.87 | 7.22  | 4.60                         | 4.40 | 5.17 | 7.13  |
| FTC                  | RAL    | NFVt   | 2.79                      | 1.69 | 2.76 | 2.82               | 3.38 | 2.87 | 3.40  | 4.48               | 5.55 | 4.44 | 7.23  | 4.61                         | 4.99 | 5.85 | 8.31  |
| AZTb                 | NVP    | EVG/c  | 0.37                      | 4.43 | 1.41 | 4.43               | 1.42 | 4.43 | 4.43  | 4.80               | 1.78 | 5.85 | 6.21  | 5.28                         | 1.83 | 7.01 | 7.84  |
| AZTt                 | NVP    | EVG/c  | 0.39                      | 4.43 | 1.41 | 4.43               | 1.42 | 4.43 | 4.43  | 4.83               | 1.81 | 5.85 | 6.24  | 5.33                         | 1.86 | 7.01 | 7.89  |
| FTC                  | RAL    | NFVb   | 2.79                      | 1.69 | 2.80 | 2.82               | 3.44 | 2.93 | 3.45  | 4.48               | 5.59 | 4.49 | 7.28  | 4.61                         | 5.04 | 5.88 | 8.35  |
| FTC                  | ddIEC  | ABCq   | 2.79                      | 2.56 | 2.14 | 3.19               | 2.90 | 2.82 | 3.26  | 5.35               | 4.93 | 4.70 | 7.49  | 3.86                         | 2.97 | 3.21 | 4.09  |
| ddIEC                | ABCb   | NFVt   | 2.56                      | 1.91 | 2.76 | 2.74               | 3.48 | 2.96 | 3.52  | 4.47               | 5.32 | 4.67 | 7.23  | 3.11                         | 4.64 | 4.36 | 5.72  |
| FTC                  | ddIEC  | ENF    | 2.79                      | 2.56 | 2.07 | 3.19               | 2.99 | 2.94 | 3.34  | 5.35               | 4.86 | 4.63 | 7.42  | 3.86                         | 4.39 | 4.33 | 5.95  |
| d4T                  | NVP    | RAL    | 0.25                      | 4.43 | 1.69 | 4.43               | 1.69 | 4.43 | 4.43  | 4.68               | 1.94 | 6.12 | 6.37  | 4.90                         | 2.00 | 6.36 | 7.21  |
| d4T                  | NVP    | MVC    | 0.25                      | 4.43 | 1.72 | 4.43               | 1.73 | 4.43 | 4.43  | 4.68               | 1.97 | 6.16 | 6.40  | 4.90                         | 1.95 | 7.26 | 7.62  |
| ddIEC                | ABCb   | NFVb   | 2.56                      | 1.91 | 2.80 | 2.74               | 3.53 | 3.03 | 3.57  | 4.47               | 5.36 | 4.72 | 7.28  | 3.11                         | 4.69 | 4.41 | 5.77  |
| FTC                  | ABCb   | NFVt   | 2.79                      | 1.91 | 2.76 | 2.86               | 3.38 | 2.96 | 3.42  | 4.70               | 5.55 | 4.67 | 7.46  | 2.92                         | 4.99 | 4.36 | 5.85  |
| AZTb                 | NVP    | RAL    | 0.37                      | 4.43 | 1.69 | 4.43               | 1.69 | 4.43 | 4.43  | 4.80               | 2.05 | 6.12 | 6.49  | 5.28                         | 2.07 | 6.36 | 7.67  |
| AZTt                 | NVP    | RAL    | 0.39                      | 4.43 | 1.69 | 4.43               | 1.69 | 4.43 | 4.43  | 4.83               | 2.08 | 6.12 | 6.51  | 5.33                         | 2.10 | 6.36 | 7.72  |
| AZTb                 | NVP    | MVC    | 0.37                      | 4.43 | 1.72 | 4.43               | 1.72 | 4.43 | 4.43  | 4.80               | 2.09 | 6.16 | 6.52  | 5.28                         | 2.06 | 7.26 | 8.15  |
| AZTb                 | NVP    | MVC    | 0.37                      | 4.43 | 1.72 | 4.43               | 1.72 | 4.43 | 4.43  | 4.80               | 2.09 | 6.16 | 6.52  | 5.28                         | 2.06 | 7.26 | 8.15  |
| FTC                  | ABCb   | NFVb   | 2.79                      | 1.91 | 2.80 | 2.86               | 3.44 | 3.03 | 3.48  | 4.70               | 5.59 | 4.72 | 7.51  | 2.92                         | 5.04 | 4.41 | 5.90  |
| AZTt                 | NVP    | MVC    | 0.39                      | 4.43 | 1.72 | 4.43               | 1.72 | 4.43 | 4.43  | 4.83               | 2.12 | 6.16 | 6.55  | 5.33                         | 2.09 | 7.26 | 8.20  |
| ddIEC                | ABCq   | NFVt   | 2.56                      | 2.14 | 2.76 | 2.82               | 3.48 | 3.04 | 3.55  | 4.70               | 5.32 | 4.90 | 7.46  | 3.21                         | 4.64 | 4.56 | 5.86  |
| ddIEC                | ENF    | NFVt   | 2.56                      | 2.07 | 2.76 | 2.94               | 3.48 | 3.16 | 3.64  | 4.63               | 5.32 | 4.83 | 7.39  | 4.33                         | 4.64 | 5.11 | 6.97  |
| d4T                  | ABCb   | NVP    | 0.25                      | 1.91 | 4.43 | 1.92               | 4.43 | 4.44 | 4.44  | 2.16               | 4.68 | 6.35 | 6.60  | 2.42                         | 4.90 | 5.63 | 7.36  |
| ddlq                 | NVP    | EVG/c  | 0.75                      | 4.43 | 1.41 | 4.45               | 1.60 | 4.43 | 4.45  | 5.18               | 2.16 | 5.85 | 6.59  | 5.05                         | 2.25 | 7.01 | 7.37  |
| ddIEC                | ENF    | NFVb   | 2.56                      | 2.07 | 2.80 | 2.94               | 3.53 | 3.15 | 3.66  | 4.63               | 5.36 | 4.87 | 7.43  | 4.33                         | 4.69 | 5.17 | 7.01  |
| ddIEC                | ABCq   | NFVb   | 2.56                      | 2.14 | 2.80 | 2.82               | 3.53 | 3.10 | 3.59  | 4.70               | 5.36 | 4.94 | 7.50  | 3.21                         | 4.69 | 4.61 | 5.91  |
| FTC                  | ABCq   | NFVt   | 2.79                      | 2.14 | 2.76 | 2.90               | 3.38 | 3.04 | 3.44  | 4.93               | 5.55 | 4.90 | 7.69  | 2.97                         | 4.99 | 4.56 | 6.00  |
| TDF                  | NVP    | EVG/c  | 0.86                      | 4.43 | 1.41 | 4.43               | 1.43 | 4.43 | 4.43  | 5.29               | 2.27 | 5.85 | 6.71  | 5.32                         | 2.24 | 7.01 | 7.62  |
| ddlq                 | NVP    | EVG/c  | 0.84                      | 4.43 | 1.41 | 4.46               | 1.62 | 4.43 | 4.46  | 5.27               | 2.25 | 5.85 | 6.69  | 5.12                         | 2.36 | 7.01 | 7.48  |
| FTC                  | ENF    | NFVt   | 2.79                      | 2.07 | 2.76 | 2.99               | 3.38 | 3.16 | 3.53  | 4.86               | 5.55 | 4.83 | 7.62  | 4.39                         | 4.99 | 5.11 | 7.19  |
| AZTb                 | ABCb   | NVP    | 0.37                      | 1.91 | 4.43 | 1.91               | 4.43 | 4.44 | 4.44  | 2.28               | 4.80 | 6.35 | 6.71  | 2.84                         | 5.28 | 5.63 | 8.22  |
| AZTt                 | ABCb   | NVP    | 0.39                      | 1.91 | 4.43 | 1.91               | 4.43 | 4.44 | 4.44  | 2.31               | 4.83 | 6.35 | 6.74  | 2.91                         | 5.33 | 5.63 | 8.27  |
| 3TCb                 | ddIEC  | NFVt   | 2.30                      | 2.56 | 2.76 | 2.91               | 3.12 | 3.48 | 3.59  | 4.86               | 5.06 | 5.32 | 7.62  | 3.38                         | 4.32 | 4.64 | 5.68  |
| d4T                  | NVP    | ENF    | 0.25                      | 4.43 | 2.07 | 4.43               | 2.07 | 4.47 | 4.47  | 4.68               | 2.32 | 6.50 | 6.75  | 4.90                         | 2.33 | 6.17 | 7.33  |
| FTC                  | ENF    | NFVb   | 2.79                      | 2.07 | 2.80 | 2.99               | 3.44 | 3.15 | 3.56  | 4.86               | 5.59 | 4.87 | 7.66  | 4.39                         | 5.04 | 5.17 | 7.24  |
| FTC                  | ABCq   | NFVb   | 2.79                      | 2.14 | 2.80 | 2.90               | 3.44 | 3.10 | 3.49  | 4.93               | 5.59 | 4.94 | 7.73  | 2.97                         | 5.04 | 4.61 | 6.05  |
| 3TCq                 | ddIEC  | NFVt   | 2.35                      | 2.56 | 2.76 | 2.92               | 3.14 | 3.48 | 3.59  | 4.91               | 5.11 | 5.32 | 7.67  | 3.40                         | 4.35 | 4.64 | 5.71  |
| d4T                  | ABCq   | NVP    | 0.25                      | 2.14 | 4.43 | 2.14               | 4.43 | 4.44 | 4.44  | 2.39               | 4.68 | 6.58 | 6.82  | 2.65                         | 4.90 | 5.77 | 7.68  |
| 3TCb                 | ddIEC  | NFVb   | 2.30                      | 2.56 | 2.80 | 2.91               | 3.17 | 3.53 | 3.63  | 4.86               | 5.11 | 5.36 | 7.67  | 3.38                         | 4.36 | 4.69 | 5.73  |
| ddlq                 | NVP    | RAL    | 0.75                      | 4.43 | 1.69 | 4.45               | 1.83 | 4.43 | 4.45  | 5.18               | 2.43 | 6.12 | 6.87  | 5.05                         | 2.38 | 6.36 | 6.83  |
| 3TCq                 | ddIEC  | NFVb   | 2.35                      | 2.56 | 2.80 | 2.92               | 3.20 | 3.53 | 3.63  | 4.91               | 5.15 | 5.36 | 7.71  | 3.40                         | 4.40 | 4.69 | 5.75  |
| AZTb                 | NVP    | ENF    | 0.37                      | 4.43 | 2.07 | 4.43               | 2.07 | 4.47 | 4.47  | 4.80               | 2.44 | 6.50 | 6.87  | 5.28                         | 2.51 | 6.17 | 7.95  |
| ddlq                 | NVP    | MVC    | 0.75                      | 4.43 | 1.72 | 4.45               | 1.83 | 4.43 | 4.45  | 5.18               | 2.47 | 6.16 | 6.90  | 5.05                         | 2.54 | 7.26 | 7.56  |
| ddlq                 | NVP    | MVC    | 0.75                      | 4.43 | 1.72 | 4.45               | 1.83 | 4.43 | 4.45  | 5.18               | 2.47 | 6.16 | 6.90  | 5.05                         | 2.54 | 7.26 | 7.56  |
| AZTt                 | NVP    | ENF    | 0.39                      | 4.43 | 2.07 | 4.43               | 2.07 | 4.47 | 4.47  | 4.83               | 2.46 | 6.50 | 6.90  | 5.33                         | 2.54 | 6.17 | 8.00  |
| AZTb                 | ABCq   | NVP    | 0.37                      | 2.14 | 4.43 | 2.14               | 4.43 | 4.44 | 4.44  | 2.51               | 4.80 | 6.58 | 6.94  | 3.07                         | 5.28 | 5.77 | 8.60  |
| AZTt                 | ABCq   | NVP    | 0.39                      | 2.14 | 4.43 | 2.14               | 4.43 | 4.44 | 4.44  | 2.54               | 4.83 | 6.58 | 6.97  | 3.13                         | 5.33 | 5.77 | 8.66  |
| TDF                  | NVP    | RAL    | 0.86                      | 4.43 | 1.69 | 4.43               | 1.69 | 4.43 | 4.43  | 5.29               | 2.55 | 6.12 | 6.98  | 5.32                         | 2.71 | 6.36 | 7.26  |
| ddlq                 | NVP    | RAL    | 0.84                      | 4.43 | 1.69 | 4.46               | 1.85 | 4.43 | 4.46  | 5.27               | 2.53 | 6.12 | 6.96  | 5.12                         | 2.47 | 6.36 | 6.92  |
| d4T                  | 3TCb   | NVP    | 0.25                      | 2.30 | 4.43 | 2.31               | 4.43 | 4.45 | 4.45  | 2.55               | 4.68 | 6.74 | 6.99  | 2.72                         | 4.90 | 5.71 | 7.66  |
| TDF                  | NVP    | MVC    | 0.86                      | 4.43 | 1.72 | 4.43               | 1.73 | 4.43 | 4.43  | 5.29               | 2.58 | 6.16 | 7.01  | 5.32                         | 2.95 | 7.26 | 8.02  |
| ddlq                 | NVP    | MVC    | 0.84                      | 4.43 | 1.72 | 4.46               | 1.85 | 4.43 | 4.46  | 5.27               | 2.56 | 6.16 | 6.99  | 5.12                         | 2.64 | 7.26 | 7.67  |
| d4T                  | 3TCq   | NVP    | 0.25                      | 2.35 | 4.43 | 2.35               | 4.43 | 4.45 | 4.45  | 2.60               | 4.68 | 6.78 | 7.03  | 2.77                         | 4.90 | 5.74 | 7.72  |
| ddlq                 | ABCb   | NVP    | 0.75                      | 1.91 | 4.43 | 2.04               | 4.45 | 4.44 | 4.46  | 2.66               | 5.18 | 6.35 | 7.09  | 2.17                         | 5.05 | 5.63 | 6.12  |
| AZTb                 | 3TCb   | NVP    | 0.37                      | 2.30 | 4.43 | 2.30               | 4.43 | 4.45 | 4.45  | 2.67               | 4.80 | 6.74 | 7.10  | 2.91                         | 5.28 | 5.71 | 8.28  |
| AZTt                 | 3TCb   | NVP    | 0.39                      | 2.30 | 4.43 | 2.30               | 4.43 | 4.45 | 4.45  | 2.70               | 4.83 | 6.74 | 7.13  | 2.95                         | 5.33 | 5.71 | 8.33  |
| AZTb                 | 3TCq   | NVP    | 0.37                      | 2.35 | 4.43 | 2.35               | 4.43 | 4.45 | 4.45  | 2.72               | 4.80 | 6.78 | 7.15  | 2.95                         | 5.28 | 5.74 | 8.35  |
| AZTt                 | 3TCq   | NVP    | 0.39                      | 2.35 | 4.43 | 2.35               | 4.43 | 4.45 | 4.45  | 2.74               | 4.83 | 6.78 | 7.17  | 2.99                         | 5.33 | 5.74 | 8.39  |
| TDF                  | ABCb   | NVP    | 0.86                      | 1.91 | 4.43 | 1.92               | 4.43 | 4.44 | 4.44  | 2.77               | 5.29 | 6.35 | 7.21  | 1.89                         | 5.32 | 5.63 | 6.36  |
| ddlq                 | ABCb   | NVP    | 0.84                      | 1.91 | 4.43 | 2.06               | 4.46 | 4.44 | 4.46  | 2.75               | 5.27 | 6.35 | 7.19  | 2.20                         | 5.12 | 5.63 | 6.18  |
| ddlq                 | NVP    | ENF    | 0.75                      | 4.43 | 2.07 | 4.45               | 2.24 | 4.47 | 4.49  | 5.18               | 2.82 | 6.50 | 7.25  | 5.05                         | 2.71 | 6.17 | 6.77  |
| ddlq                 | ABCq   | NVP    | 0.75                      | 2.14 | 4.43 | 2.24               | 4.45 | 4.44 | 4.46  | 2.89               | 5.18 | 6.58 | 7.32  | 2.38                         | 5.05 | 5.77 | 6.24  |
| d4T                  | ddIEC  | NVP    | 0.25                      | 2.56 | 4.43 | 2.56               | 4.43 | 4.57 | 4.57  | 2.81               | 4.68 | 6.99 | 7.24  | 3.29                         | 4.90 | 6.55 | 8.94  |
| FTC                  | ddIEC  | NFVt   | 2.79                      | 2.56 | 2.76 | 3.19               | 3.38 | 3.48 | 3.73  | 5.35               | 5.55 | 5.32 | 8.11  | 3.86                         | 4.99 | 4.64 | 6.27  |
| TDF                  | NVP    | ENF    | 0.86                      | 4.43 | 2.07 | 4.43               | 2.08 | 4.47 | 4.47  | 5.29               | 2.93 | 6.50 | 7.36  | 5.32                         | 2.62 | 6.17 | 6.99  |
| ddlq                 | NVP    | ENF    | 0.84                      | 4.43 | 2.07 | 4.46               | 2.26 | 4.47 | 4.50  | 5.27               | 2.91 | 6.50 | 7.34  | 5.12                         | 2.79 | 6.17 | 6.85  |
| TDF                  | ABCq   | NVP    | 0.86                      | 2.14 | 4.43 | 2.14               | 4.43 | 4.44 | 4.44  | 3.00               | 5.29 | 6.58 | 7.43  | 2.11                         | 5.32 | 5.77 | 6.48  |
| ddlq                 | ABCq   | NVP    | 0.84                      | 2.14 | 4.43 | 2.25               | 4.46 | 4.44 | 4.46  | 2.98               | 5.27 | 6.58 | 7.41  | 2.41                         | 5.12 | 5.77 | 6.30  |

| Regimen <sup>a</sup> |        |        | IIP <sub>ave</sub> |      |      |                    |      |      |       |                    |      |      |       |                       |      |      |       |
|----------------------|--------|--------|--------------------|------|------|--------------------|------|------|-------|--------------------|------|------|-------|-----------------------|------|------|-------|
|                      |        |        | Single drug        |      |      | Loewe <sup>b</sup> |      |      |       | Bliss <sup>c</sup> |      |      |       | DI Index <sup>d</sup> |      |      |       |
| Drug 1               | Drug 2 | Drug 3 | 1                  | 2    | 3    | 1,2                | 1,3  | 2,3  | 1,2,3 | 1,2                | 1,3  | 2,3  | 1,2,3 | 1,2                   | 1,3  | 2,3  | 1,2,3 |
| FTC                  | ddIEC  | NFVb   | 2.79               | 2.56 | 2.80 | 3.19               | 3.44 | 3.53 | 3.77  | 5.35               | 5.59 | 5.36 | 8.15  | 3.86                  | 5.04 | 4.69 | 6.32  |
| AZTb                 | ddIEC  | NVP    | 0.37               | 2.56 | 4.43 | 2.56               | 4.43 | 4.57 | 4.57  | 2.93               | 4.80 | 6.99 | 7.36  | 3.41                  | 5.28 | 6.55 | 9.21  |
| d4T                  | FTC    | NVP    | 0.25               | 2.79 | 4.43 | 2.79               | 4.43 | 4.48 | 4.48  | 3.04               | 4.68 | 7.22 | 7.47  | 3.21                  | 4.90 | 6.21 | 8.34  |
| 3TCb                 | ddIb   | NVP    | 2.30               | 0.75 | 4.43 | 2.39               | 4.45 | 4.45 | 4.47  | 3.05               | 6.74 | 5.18 | 7.48  | 2.55                  | 5.71 | 5.05 | 6.25  |
| AZTt                 | ddIEC  | NVP    | 0.39               | 2.56 | 4.43 | 2.56               | 4.43 | 4.57 | 4.57  | 2.95               | 4.83 | 6.99 | 7.39  | 3.46                  | 5.33 | 6.55 | 9.26  |
| 3TCq                 | ddIb   | NVP    | 2.35               | 0.75 | 4.43 | 2.44               | 4.45 | 4.45 | 4.47  | 3.10               | 6.78 | 5.18 | 7.53  | 2.59                  | 5.74 | 5.05 | 6.28  |
| NVP                  | EVG/c  | MVC    | 4.43               | 1.41 | 1.72 | 4.43               | 4.43 | 1.84 | 4.43  | 5.85               | 6.16 | 3.14 | 7.57  | 7.01                  | 7.26 | 3.20 | 9.46  |
| NVP                  | EVG/c  | MVC    | 4.43               | 1.41 | 1.72 | 4.43               | 4.43 | 1.84 | 4.43  | 5.85               | 6.16 | 3.14 | 7.57  | 7.01                  | 7.26 | 3.20 | 9.46  |
| 3TCb                 | TDF    | NVP    | 2.30               | 0.86 | 4.43 | 2.30               | 4.45 | 4.43 | 4.45  | 3.16               | 6.74 | 5.29 | 7.60  | 2.97                  | 5.71 | 5.32 | 6.91  |
| 3TCb                 | ddlq   | NVP    | 2.30               | 0.84 | 4.43 | 2.41               | 4.45 | 4.46 | 4.47  | 3.14               | 6.74 | 5.27 | 7.58  | 2.58                  | 5.71 | 5.12 | 6.31  |
| AZTb                 | FTC    | NVP    | 0.37               | 2.79 | 4.43 | 2.79               | 4.43 | 4.48 | 4.48  | 3.16               | 4.80 | 7.22 | 7.59  | 3.55                  | 5.28 | 6.21 | 9.33  |
| 3TCq                 | TDF    | NVP    | 2.35               | 0.86 | 4.43 | 2.35               | 4.45 | 4.43 | 4.45  | 3.21               | 6.78 | 5.29 | 7.64  | 3.02                  | 5.74 | 5.32 | 6.94  |
| 3TCq                 | ddlq   | NVP    | 2.35               | 0.84 | 4.43 | 2.45               | 4.45 | 4.46 | 4.47  | 3.19               | 6.78 | 5.27 | 7.62  | 2.62                  | 5.74 | 5.12 | 6.33  |
| AZTt                 | FTC    | NVP    | 0.39               | 2.79 | 4.43 | 2.79               | 4.43 | 4.48 | 4.48  | 3.18               | 4.83 | 7.22 | 7.62  | 3.60                  | 5.33 | 6.21 | 9.38  |
| d4T                  | NVP    | NFVt   | 0.25               | 4.43 | 2.76 | 4.43               | 2.76 | 4.73 | 4.73  | 4.68               | 3.01 | 7.19 | 7.44  | 4.90                  | 2.92 | 7.39 | 8.12  |
| ABCb                 | NVP    | EVG/c  | 1.91               | 4.43 | 1.41 | 4.44               | 2.02 | 4.43 | 4.44  | 6.35               | 3.33 | 5.85 | 7.76  | 5.63                  | 3.39 | 7.01 | 8.54  |
| d4T                  | NVP    | NFVb   | 0.25               | 4.43 | 2.80 | 4.43               | 2.80 | 4.75 | 4.75  | 4.68               | 3.05 | 7.23 | 7.48  | 4.90                  | 2.96 | 7.44 | 8.16  |
| NVP                  | RAL    | MVC    | 4.43               | 1.69 | 1.72 | 4.43               | 4.43 | 1.94 | 4.43  | 6.12               | 6.16 | 3.41 | 7.84  | 6.36                  | 7.26 | 3.94 | 9.20  |
| NVP                  | RAL    | MVC    | 4.43               | 1.69 | 1.72 | 4.43               | 4.43 | 1.94 | 4.43  | 6.12               | 6.16 | 3.41 | 7.84  | 6.36                  | 7.26 | 3.94 | 9.20  |
| AZTb                 | NVP    | NFVt   | 0.37               | 4.43 | 2.76 | 4.43               | 2.76 | 4.73 | 4.73  | 4.80               | 3.12 | 7.19 | 7.56  | 5.28                  | 3.20 | 7.39 | 9.00  |
| AZTt                 | NVP    | NFVt   | 0.39               | 4.43 | 2.76 | 4.43               | 2.76 | 4.73 | 4.73  | 4.83               | 3.15 | 7.19 | 7.58  | 5.33                  | 3.23 | 7.39 | 9.05  |
| AZTb                 | NVP    | NFVb   | 0.37               | 4.43 | 2.80 | 4.43               | 2.80 | 4.75 | 4.75  | 4.80               | 3.17 | 7.23 | 7.60  | 5.28                  | 3.25 | 7.44 | 9.05  |
| AZTt                 | NVP    | NFVb   | 0.39               | 4.43 | 2.80 | 4.43               | 2.80 | 4.75 | 4.75  | 4.83               | 3.19 | 7.23 | 7.63  | 5.33                  | 3.28 | 7.44 | 9.09  |
| NVP                  | ENF    | EVG/c  | 4.43               | 2.07 | 1.41 | 4.47               | 4.43 | 2.20 | 4.47  | 6.50               | 5.85 | 3.48 | 7.92  | 6.17                  | 7.01 | 3.46 | 8.88  |
| ddIEC                | TDF    | NVP    | 2.56               | 0.86 | 4.43 | 2.56               | 4.57 | 4.43 | 4.57  | 3.42               | 6.99 | 5.29 | 7.85  | 2.51                  | 6.55 | 5.32 | 7.01  |
| ABCq                 | NVP    | EVG/c  | 2.14               | 4.43 | 1.41 | 4.44               | 2.20 | 4.43 | 4.44  | 6.58               | 3.56 | 5.85 | 7.99  | 5.77                  | 3.62 | 7.01 | 8.80  |
| FTC                  | ddIb   | NVP    | 2.79               | 0.75 | 4.43 | 2.85               | 4.48 | 4.45 | 4.50  | 3.54               | 7.22 | 5.18 | 7.97  | 3.06                  | 6.21 | 5.05 | 6.68  |
| ABCb                 | NVP    | RAL    | 1.91               | 4.43 | 1.69 | 4.44               | 2.10 | 4.43 | 4.44  | 6.35               | 3.60 | 6.12 | 8.03  | 5.63                  | 3.45 | 6.36 | 7.68  |
| ABCb                 | NVP    | MVC    | 1.91               | 4.43 | 1.72 | 4.44               | 2.07 | 4.43 | 4.44  | 6.35               | 3.64 | 6.16 | 8.07  | 5.63                  | 4.16 | 7.26 | 8.90  |
| ABCb                 | NVP    | MVC    | 1.91               | 4.43 | 1.72 | 4.44               | 2.07 | 4.43 | 4.44  | 6.35               | 3.64 | 6.16 | 8.07  | 5.63                  | 4.16 | 7.26 | 8.90  |
| AZTb                 | d4T    | ATV    | 0.37               | 0.25 | 5.97 | 0.45               | 5.97 | 5.97 | 5.97  | 0.62               | 6.33 | 6.22 | 6.58  | 0.45                  | 6.09 | 6.06 | 6.18  |
| FTC                  | TDF    | NVP    | 2.79               | 0.86 | 4.43 | 2.79               | 4.48 | 4.43 | 4.48  | 3.65               | 7.22 | 5.29 | 8.08  | 3.07                  | 6.21 | 5.32 | 7.04  |
| FTC                  | ddlq   | NVP    | 2.79               | 0.84 | 4.43 | 2.86               | 4.48 | 4.46 | 4.50  | 3.63               | 7.22 | 5.27 | 8.06  | 3.10                  | 6.21 | 5.12 | 6.74  |
| AZTt                 | d4T    | ATV    | 0.39               | 0.25 | 5.97 | 0.47               | 5.97 | 5.97 | 5.97  | 0.64               | 6.36 | 6.22 | 6.61  | 0.47                  | 6.10 | 6.06 | 6.19  |
| 3TCb                 | NVP    | EVG/c  | 2.30               | 4.43 | 1.41 | 4.45               | 2.35 | 4.43 | 4.45  | 6.74               | 3.72 | 5.85 | 8.15  | 5.71                  | 4.06 | 7.01 | 9.08  |
| 3TCq                 | NVP    | EVG/c  | 2.35               | 4.43 | 1.41 | 4.45               | 2.39 | 4.43 | 4.45  | 6.78               | 3.76 | 5.85 | 8.20  | 5.74                  | 4.10 | 7.01 | 9.13  |
| NVP                  | ENF    | RAL    | 4.43               | 2.07 | 1.69 | 4.47               | 4.43 | 2.29 | 4.47  | 6.50               | 6.12 | 3.76 | 8.19  | 6.17                  | 6.36 | 3.96 | 8.29  |
| ddIb                 | NVP    | NFVt   | 0.75               | 4.43 | 2.76 | 4.45               | 2.92 | 4.73 | 4.74  | 5.18               | 3.50 | 7.19 | 7.94  | 5.05                  | 3.29 | 7.39 | 7.63  |
| NVP                  | ENF    | MVC    | 4.43               | 2.07 | 1.72 | 4.47               | 4.43 | 2.26 | 4.47  | 6.50               | 6.16 | 3.79 | 8.23  | 6.17                  | 7.26 | 4.70 | 9.55  |
| NVP                  | ENF    | MVC    | 4.43               | 2.07 | 1.72 | 4.47               | 4.43 | 2.26 | 4.47  | 6.50               | 6.16 | 3.79 | 8.23  | 6.17                  | 7.26 | 4.70 | 9.55  |
| ABCq                 | NVP    | RAL    | 2.14               | 4.43 | 1.69 | 4.44               | 2.26 | 4.43 | 4.44  | 6.58               | 3.83 | 6.12 | 8.26  | 5.77                  | 3.68 | 6.36 | 7.87  |
| ABCq                 | NVP    | MVC    | 2.14               | 4.43 | 1.72 | 4.44               | 2.23 | 4.43 | 4.44  | 6.58               | 3.87 | 6.16 | 8.30  | 5.77                  | 4.41 | 7.26 | 9.17  |
| ABCq                 | NVP    | MVC    | 2.14               | 4.43 | 1.72 | 4.44               | 2.23 | 4.43 | 4.44  | 6.58               | 3.87 | 6.16 | 8.30  | 5.77                  | 4.41 | 7.26 | 9.17  |
| ddIb                 | NVP    | NFVb   | 0.75               | 4.43 | 2.80 | 4.45               | 2.96 | 4.75 | 4.77  | 5.18               | 3.55 | 7.23 | 7.98  | 5.05                  | 3.33 | 7.44 | 7.67  |
| ddlq                 | NVP    | NFVt   | 0.84               | 4.43 | 2.76 | 4.46               | 2.93 | 4.73 | 4.75  | 5.27               | 3.60 | 7.19 | 8.03  | 5.12                  | 3.35 | 7.39 | 7.71  |
| TDF                  | NVP    | NFVt   | 0.86               | 4.43 | 2.76 | 4.43               | 2.76 | 4.73 | 4.73  | 5.29               | 3.62 | 7.19 | 8.05  | 5.32                  | 3.16 | 7.39 | 7.86  |
| ddlq                 | NVP    | NFVb   | 0.84               | 4.43 | 2.80 | 4.46               | 2.98 | 4.75 | 4.77  | 5.27               | 3.64 | 7.23 | 8.07  | 5.12                  | 3.40 | 7.44 | 7.75  |
| TDF                  | NVP    | NFVb   | 0.86               | 4.43 | 2.80 | 4.43               | 2.80 | 4.75 | 4.75  | 5.29               | 3.66 | 7.23 | 8.09  | 5.32                  | 3.20 | 7.44 | 7.89  |
| 3TCb                 | NVP    | RAL    | 2.30               | 4.43 | 1.69 | 4.45               | 2.39 | 4.43 | 4.45  | 6.74               | 3.99 | 6.12 | 8.42  | 5.71                  | 4.00 | 6.36 | 8.02  |
| ABCb                 | NVP    | ENF    | 1.91               | 4.43 | 2.07 | 4.44               | 2.41 | 4.47 | 4.48  | 6.35               | 3.98 | 6.50 | 8.42  | 5.63                  | 3.61 | 6.17 | 7.40  |
| 3TCb                 | NVP    | MVC    | 2.30               | 4.43 | 1.72 | 4.45               | 2.36 | 4.43 | 4.45  | 6.74               | 4.03 | 6.16 | 8.46  | 5.71                  | 5.28 | 7.26 | 9.79  |
| 3TCq                 | NVP    | RAL    | 2.35               | 4.43 | 1.69 | 4.45               | 2.44 | 4.43 | 4.45  | 6.78               | 4.04 | 6.12 | 8.47  | 5.74                  | 4.04 | 6.36 | 8.06  |
| d4T                  | ddIb   | ATV    | 0.25               | 0.75 | 5.97 | 0.82               | 5.97 | 5.98 | 5.98  | 0.99               | 6.22 | 6.71 | 6.96  | 1.34                  | 6.06 | 6.50 | 6.74  |
| 3TCq                 | NVP    | MVC    | 2.35               | 4.43 | 1.72 | 4.45               | 2.41 | 4.43 | 4.45  | 6.78               | 4.07 | 6.16 | 8.51  | 5.74                  | 5.32 | 7.26 | 9.85  |
| ddIEC                | NVP    | EVG/c  | 2.56               | 4.43 | 1.41 | 4.57               | 2.60 | 4.43 | 4.57  | 6.99               | 3.97 | 5.85 | 8.41  | 6.55                  | 4.20 | 7.01 | 9.54  |
| d4T                  | ddlq   | ATV    | 0.25               | 0.84 | 5.97 | 0.90               | 5.97 | 5.98 | 5.98  | 1.09               | 6.22 | 6.80 | 7.05  | 1.45                  | 6.06 | 6.57 | 6.83  |
| d4T                  | TDF    | ATV    | 0.25               | 0.86 | 5.97 | 0.87               | 5.97 | 5.97 | 5.97  | 1.11               | 6.22 | 6.83 | 7.07  | 1.67                  | 6.06 | 6.32 | 6.78  |
| AZTb                 | ddIb   | ATV    | 0.37               | 0.75 | 5.97 | 0.83               | 5.97 | 5.98 | 5.98  | 1.11               | 6.33 | 6.71 | 7.08  | 1.51                  | 6.09 | 6.50 | 6.78  |
| AZTt                 | ddIb   | ATV    | 0.39               | 0.75 | 5.97 | 0.84               | 5.97 | 5.98 | 5.98  | 1.14               | 6.36 | 6.71 | 7.10  | 1.55                  | 6.10 | 6.50 | 6.80  |
| 3TCb                 | ABCb   | NVP    | 2.30               | 1.91 | 4.43 | 2.47               | 4.45 | 4.44 | 4.45  | 4.22               | 6.74 | 6.35 | 8.65  | 2.82                  | 5.71 | 5.63 | 6.59  |
| FTC                  | NVP    | EVG/c  | 2.79               | 4.43 | 1.41 | 4.48               | 2.80 | 4.43 | 4.48  | 7.22               | 4.20 | 5.85 | 8.64  | 6.21                  | 4.28 | 7.01 | 9.51  |
| ABCq                 | NVP    | ENF    | 2.14               | 4.43 | 2.07 | 4.44               | 2.53 | 4.47 | 4.48  | 6.58               | 4.21 | 6.50 | 8.65  | 5.77                  | 3.82 | 6.17 | 7.57  |
| 3TCq                 | ABCb   | NVP    | 2.35               | 1.91 | 4.43 | 2.51               | 4.45 | 4.44 | 4.45  | 4.26               | 6.78 | 6.35 | 8.70  | 2.86                  | 5.74 | 5.63 | 6.61  |
| AZTb                 | ddlq   | ATV    | 0.37               | 0.84 | 5.97 | 0.91               | 5.97 | 5.98 | 5.98  | 1.21               | 6.33 | 6.80 | 7.17  | 1.61                  | 6.09 | 6.57 | 6.85  |
| AZTb                 | TDF    | ATV    | 0.37               | 0.86 | 5.97 | 0.87               | 5.97 | 5.97 | 5.97  | 1.23               | 6.33 | 6.83 | 7.19  | 1.92                  | 6.09 | 6.32 | 6.84  |
| AZTt                 | ddlq   | ATV    | 0.39               | 0.84 | 5.97 | 0.92               | 5.97 | 5.98 | 5.98  | 1.23               | 6.36 | 6.80 | 7.20  | 1.66                  | 6.10 | 6.57 | 6.88  |
| AZTt                 | TDF    | ATV    | 0.39               | 0.86 | 5.97 | 0.87               | 5.97 | 5.97 | 5.97  | 1.25               | 6.36 | 6.83 | 7.22  | 1.99                  | 6.10 | 6.32 | 6.87  |
| AZTb                 | d4T    | ETR    | 0.37               | 0.25 | 6.31 | 0.45               | 6.30 | 6.30 | 6.30  | 0.62               | 6.67 | 6.55 | 6.92  | 0.45                  | 7.69 | 6.75 | 8.02  |
| AZTt                 | d4T    | ETR    | 0.39               | 0.25 | 6.31 | 0.47               | 6.30 | 6.30 | 6.30  | 0.64               | 6.70 | 6.55 | 6.95  | 0.47                  | 7.78 | 6.75 | 8.09  |
| ddIEC                | NVP    | RAL    | 2.56               | 4.43 | 1.69 | 4.57               | 2.66 | 4.43 | 4.57  | 6.99               | 4.25 | 6.12 | 8.68  | 6.55                  | 4.11 | 6.36 | 8.53  |

| Regimen <sup>a</sup> |                  |        | IIP <sub>ave</sub> |      |      |                    |      |      |                    |      |      |      |                       |      |      |      |       |
|----------------------|------------------|--------|--------------------|------|------|--------------------|------|------|--------------------|------|------|------|-----------------------|------|------|------|-------|
|                      |                  |        | Single drug        |      |      | Loewe <sup>b</sup> |      |      | Bliss <sup>c</sup> |      |      |      | DI Index <sup>d</sup> |      |      |      |       |
| Drug 1               | Drug 2           | Drug 3 | 1                  | 2    | 3    | 1,2                | 1,3  | 2,3  | 1,2,3              | 1,2  | 1,3  | 2,3  | 1,2,3                 | 1,2  | 1,3  | 2,3  | 1,2,3 |
| ddIEC                | NVP              | MVC    | 2.56               | 4.43 | 1.72 | 4.57               | 2.62 | 4.43 | 4.57               | 6.99 | 4.28 | 6.16 | 8.72                  | 6.55 | 4.48 | 7.26 | 9.61  |
| 3TCb                 | NVP              | ENF    | 2.30               | 4.43 | 2.07 | 4.45               | 2.63 | 4.47 | 4.49               | 6.74 | 4.37 | 6.50 | 8.81                  | 5.71 | 4.55 | 6.17 | 7.99  |
| NVP                  | EVG/c            | NFVt   | 4.43               | 1.41 | 2.76 | 4.43               | 4.73 | 2.82 | 4.73               | 5.85 | 7.19 | 4.17 | 8.60                  | 7.01 | 7.39 | 4.61 | 10.20 |
| 3TCb                 | ABCq             | NVP    | 2.30               | 2.14 | 4.43 | 2.56               | 4.45 | 4.44 | 4.45               | 4.45 | 6.74 | 6.58 | 8.88                  | 2.93 | 5.71 | 5.77 | 6.70  |
| 3TCq                 | NVP              | ENF    | 2.35               | 4.43 | 2.07 | 4.45               | 2.67 | 4.47 | 4.49               | 6.78 | 4.42 | 6.50 | 8.85                  | 5.74 | 4.60 | 6.17 | 8.03  |
| 3TCq                 | ABCq             | NVP    | 2.35               | 2.14 | 4.43 | 2.59               | 4.45 | 4.44 | 4.45               | 4.49 | 6.78 | 6.58 | 8.92                  | 2.96 | 5.74 | 5.77 | 6.73  |
| FTC                  | NVP              | RAL    | 2.79               | 4.43 | 1.69 | 4.48               | 2.82 | 4.43 | 4.48               | 7.22 | 4.48 | 6.12 | 8.91                  | 6.21 | 4.61 | 6.36 | 8.65  |
| NVP                  | EVG/c            | NFVb   | 4.43               | 1.41 | 2.80 | 4.43               | 4.75 | 2.88 | 4.75               | 5.85 | 7.23 | 4.22 | 8.65                  | 7.01 | 7.44 | 4.65 | 10.25 |
| FTC                  | NVP              | MVC    | 2.79               | 4.43 | 1.72 | 4.48               | 2.80 | 4.43 | 4.48               | 7.22 | 4.51 | 6.16 | 8.95                  | 6.21 | 4.79 | 7.26 | 9.71  |
| ddIEC                | ABCb             | NVP    | 2.56               | 1.91 | 4.43 | 2.74               | 4.57 | 4.44 | 4.58               | 4.47 | 6.99 | 6.35 | 8.91                  | 3.11 | 6.55 | 5.63 | 7.27  |
| ddl <sub>b</sub>     | TDF              | ATV    | 0.75               | 0.86 | 5.97 | 1.06               | 5.98 | 5.97 | 5.98               | 1.61 | 6.71 | 6.83 | 7.57                  | 1.03 | 6.50 | 6.32 | 6.81  |
| d4T                  | EVG/c            | ATV    | 0.25               | 1.41 | 5.97 | 1.42               | 5.97 | 5.97 | 5.97               | 1.66 | 6.22 | 7.38 | 7.63                  | 1.70 | 6.06 | 8.10 | 7.68  |
| NVP                  | RAL              | NFVt   | 4.43               | 1.69 | 2.76 | 4.43               | 4.73 | 2.87 | 4.73               | 6.12 | 7.19 | 4.44 | 8.88                  | 6.36 | 7.39 | 5.85 | 10.31 |
| d4T                  | ddl <sub>b</sub> | ETR    | 0.25               | 0.75 | 6.31 | 0.82               | 6.30 | 6.31 | 6.31               | 0.99 | 6.55 | 7.05 | 7.30                  | 1.34 | 6.75 | 6.28 | 7.41  |
| FTC                  | ABCb             | NVP    | 2.79               | 1.91 | 4.43 | 2.86               | 4.48 | 4.44 | 4.48               | 4.70 | 7.22 | 6.35 | 9.14                  | 2.92 | 6.21 | 5.63 | 6.85  |
| ddl <sub>q</sub>     | TDF              | ATV    | 0.84               | 0.86 | 5.97 | 1.10               | 5.98 | 5.97 | 5.98               | 1.70 | 6.80 | 6.83 | 7.66                  | 1.07 | 6.57 | 6.32 | 6.86  |
| ddIEC                | NVP              | ENF    | 2.56               | 4.43 | 2.07 | 4.57               | 2.94 | 4.47 | 4.61               | 6.99 | 4.63 | 6.50 | 9.06                  | 6.55 | 4.33 | 6.17 | 8.29  |
| NVP                  | RAL              | NFVb   | 4.43               | 1.69 | 2.80 | 4.43               | 4.75 | 2.93 | 4.75               | 6.12 | 7.23 | 4.49 | 8.92                  | 6.36 | 7.44 | 5.88 | 10.37 |
| d4T                  | ddl <sub>q</sub> | ETR    | 0.25               | 0.84 | 6.31 | 0.90               | 6.30 | 6.31 | 6.31               | 1.09 | 6.55 | 7.14 | 7.39                  | 1.45 | 6.75 | 6.28 | 7.53  |
| ddIEC                | ABCq             | NVP    | 2.56               | 2.14 | 4.43 | 2.82               | 4.57 | 4.44 | 4.58               | 4.70 | 6.99 | 6.58 | 9.14                  | 3.21 | 6.55 | 5.77 | 7.40  |
| AZTb                 | EVG/c            | ATV    | 0.37               | 1.41 | 5.97 | 1.42               | 5.97 | 5.97 | 5.97               | 1.78 | 6.33 | 7.38 | 7.75                  | 1.84 | 6.09 | 8.10 | 7.79  |
| d4T                  | TDF              | ETR    | 0.25               | 0.86 | 6.31 | 0.87               | 6.30 | 6.30 | 6.30               | 1.11 | 6.55 | 7.16 | 7.41                  | 1.67 | 6.75 | 6.44 | 7.69  |
| AZTb                 | ddl <sub>b</sub> | ETR    | 0.37               | 0.75 | 6.31 | 0.83               | 6.30 | 6.31 | 6.31               | 1.11 | 6.67 | 7.05 | 7.42                  | 1.51 | 7.69 | 6.28 | 8.61  |
| AZTt                 | EVG/c            | ATV    | 0.39               | 1.41 | 5.97 | 1.42               | 5.97 | 5.97 | 5.97               | 1.81 | 6.36 | 7.38 | 7.77                  | 1.87 | 6.10 | 8.10 | 7.81  |
| AZTt                 | ddl <sub>b</sub> | ETR    | 0.39               | 0.75 | 6.31 | 0.84               | 6.30 | 6.31 | 6.31               | 1.14 | 6.70 | 7.05 | 7.44                  | 1.55 | 7.78 | 6.28 | 8.67  |
| FTC                  | NVP              | ENF    | 2.79               | 4.43 | 2.07 | 4.48               | 2.99 | 4.47 | 4.51               | 7.22 | 4.86 | 6.50 | 9.29                  | 6.21 | 4.39 | 6.17 | 8.03  |
| AZTb                 | ddl <sub>q</sub> | ETR    | 0.37               | 0.84 | 6.31 | 0.91               | 6.30 | 6.31 | 6.31               | 1.21 | 6.67 | 7.14 | 7.51                  | 1.61 | 7.69 | 6.28 | 8.81  |
| ABCb                 | NVP              | NFVt   | 1.91               | 4.43 | 2.76 | 4.44               | 2.96 | 4.73 | 4.73               | 6.35 | 4.67 | 7.19 | 9.10                  | 5.63 | 4.36 | 7.39 | 8.53  |
| AZTb                 | TDF              | ETR    | 0.37               | 0.86 | 6.31 | 0.87               | 6.30 | 6.30 | 6.30               | 1.23 | 6.67 | 7.16 | 7.53                  | 1.92 | 7.69 | 6.44 | 9.00  |
| AZTt                 | ddl <sub>q</sub> | ETR    | 0.39               | 0.84 | 6.31 | 0.92               | 6.30 | 6.31 | 6.31               | 1.23 | 6.70 | 7.14 | 7.54                  | 1.66 | 7.78 | 6.28 | 8.87  |
| FTC                  | ABCq             | NVP    | 2.79               | 2.14 | 4.43 | 2.90               | 4.48 | 4.44 | 4.48               | 4.93 | 7.22 | 6.58 | 9.37                  | 2.97 | 6.21 | 5.77 | 6.97  |
| AZTt                 | TDF              | ETR    | 0.39               | 0.86 | 6.31 | 0.87               | 6.30 | 6.30 | 6.30               | 1.25 | 6.70 | 7.16 | 7.56                  | 1.99 | 7.78 | 6.44 | 9.07  |
| d4T                  | RAL              | ATV    | 0.25               | 1.69 | 5.97 | 1.69               | 5.97 | 5.97 | 5.97               | 1.94 | 6.22 | 7.65 | 7.90                  | 2.01 | 6.06 | 8.52 | 8.03  |
| 3TCb                 | ddIEC            | NVP    | 2.30               | 2.56 | 4.43 | 2.91               | 4.45 | 4.57 | 4.58               | 4.86 | 6.74 | 6.99 | 9.30                  | 3.38 | 5.71 | 6.55 | 7.39  |
| AZTb                 | d4T              | LPV/rq | 0.37               | 0.25 | 6.64 | 0.45               | 6.64 | 6.64 | 6.64               | 0.62 | 7.01 | 6.89 | 7.26                  | 0.45 | 7.14 | 6.80 | 7.25  |
| ABCb                 | NVP              | NFVb   | 1.91               | 4.43 | 2.80 | 4.44               | 3.03 | 4.75 | 4.75               | 6.35 | 4.72 | 7.23 | 9.15                  | 5.63 | 4.41 | 7.44 | 8.57  |
| AZTt                 | d4T              | LPV/rq | 0.39               | 0.25 | 6.64 | 0.47               | 6.64 | 6.64 | 6.64               | 0.64 | 7.03 | 6.89 | 7.28                  | 0.47 | 7.17 | 6.80 | 7.27  |
| 3TCq                 | ddIEC            | NVP    | 2.35               | 2.56 | 4.43 | 2.92               | 4.45 | 4.57 | 4.58               | 4.91 | 6.78 | 6.99 | 9.34                  | 3.40 | 5.74 | 6.55 | 7.41  |
| AZTb                 | RAL              | ATV    | 0.37               | 1.69 | 5.97 | 1.69               | 5.97 | 5.97 | 5.97               | 2.05 | 6.33 | 7.65 | 8.02                  | 2.08 | 6.09 | 8.52 | 8.09  |
| AZTt                 | RAL              | ATV    | 0.39               | 1.69 | 5.97 | 1.69               | 5.97 | 5.97 | 5.97               | 2.08 | 6.36 | 7.65 | 8.05                  | 2.11 | 6.10 | 8.52 | 8.11  |
| NVP                  | ENF              | NFVt   | 4.43               | 2.07 | 2.76 | 4.47               | 4.73 | 3.16 | 4.76               | 6.50 | 7.19 | 4.83 | 9.26                  | 6.17 | 7.39 | 5.11 | 9.38  |
| ABCq                 | NVP              | NFVt   | 2.14               | 4.43 | 2.76 | 4.44               | 3.04 | 4.73 | 4.73               | 6.58 | 4.90 | 7.19 | 9.33                  | 5.77 | 4.56 | 7.39 | 8.71  |
| NVP                  | ENF              | NFVb   | 4.43               | 2.07 | 2.80 | 4.47               | 4.75 | 3.15 | 4.78               | 6.50 | 7.23 | 4.87 | 9.30                  | 6.17 | 7.44 | 5.17 | 9.43  |
| d4T                  | ABCb             | ATV    | 0.25               | 1.91 | 5.97 | 1.92               | 5.97 | 5.97 | 5.97               | 2.16 | 6.22 | 7.88 | 8.13                  | 2.42 | 6.06 | 7.02 | 7.50  |
| ddl <sub>b</sub>     | EVG/c            | ATV    | 0.75               | 1.41 | 5.97 | 1.60               | 5.98 | 5.97 | 5.98               | 2.16 | 6.71 | 7.38 | 8.13                  | 2.25 | 6.50 | 8.10 | 8.46  |
| ABCq                 | NVP              | NFVb   | 2.14               | 4.43 | 2.80 | 4.44               | 3.10 | 4.75 | 4.75               | 6.58 | 4.94 | 7.23 | 9.38                  | 5.77 | 4.61 | 7.44 | 8.76  |
| ddl <sub>q</sub>     | EVG/c            | ATV    | 0.84               | 1.41 | 5.97 | 1.62               | 5.98 | 5.97 | 5.98               | 2.25 | 6.80 | 7.38 | 8.22                  | 2.36 | 6.57 | 8.10 | 8.56  |
| TDF                  | EVG/c            | ATV    | 0.86               | 1.41 | 5.97 | 1.43               | 5.97 | 5.97 | 5.97               | 2.27 | 6.83 | 7.38 | 8.24                  | 2.25 | 6.32 | 8.10 | 8.29  |
| AZTb                 | ABCb             | ATV    | 0.37               | 1.91 | 5.97 | 1.91               | 5.97 | 5.97 | 5.97               | 2.28 | 6.33 | 7.88 | 8.25                  | 2.84 | 6.09 | 7.02 | 7.85  |
| ddl <sub>b</sub>     | TDF              | ETR    | 0.75               | 0.86 | 6.31 | 1.06               | 6.31 | 6.30 | 6.31               | 1.61 | 7.05 | 7.16 | 7.91                  | 1.03 | 6.28 | 6.44 | 6.40  |
| 3TCb                 | NVP              | NFVt   | 2.30               | 4.43 | 2.76 | 4.45               | 3.12 | 4.73 | 4.74               | 6.74 | 5.06 | 7.19 | 9.49                  | 5.71 | 4.32 | 7.39 | 8.51  |
| AZTt                 | ABCb             | ATV    | 0.39               | 1.91 | 5.97 | 1.91               | 5.97 | 5.97 | 5.97               | 2.31 | 6.36 | 7.88 | 8.27                  | 2.91 | 6.10 | 7.02 | 7.89  |
| d4T                  | ENF              | ATV    | 0.25               | 2.07 | 5.97 | 2.07               | 5.97 | 5.98 | 5.98               | 2.32 | 6.22 | 8.04 | 8.29                  | 2.34 | 6.06 | 7.65 | 7.55  |
| d4T                  | ETR              | EVG/c  | 0.25               | 6.31 | 1.41 | 6.30               | 1.42 | 6.30 | 6.30               | 6.55 | 1.66 | 7.72 | 7.97                  | 6.75 | 1.69 | 7.55 | 8.46  |
| 3TCq                 | NVP              | NFVt   | 2.35               | 4.43 | 2.76 | 4.45               | 3.14 | 4.73 | 4.74               | 6.78 | 5.11 | 7.19 | 9.54                  | 5.74 | 4.35 | 7.39 | 8.54  |
| d4T                  | ddl <sub>b</sub> | LPV/rq | 0.25               | 0.75 | 6.64 | 0.82               | 6.64 | 6.64 | 6.64               | 0.99 | 6.89 | 7.39 | 7.63                  | 1.34 | 6.80 | 7.20 | 7.52  |
| 3TCb                 | NVP              | NFVb   | 2.30               | 4.43 | 2.80 | 4.45               | 3.17 | 4.75 | 4.76               | 6.74 | 5.11 | 7.23 | 9.54                  | 5.71 | 4.36 | 7.44 | 8.55  |
| ddl <sub>q</sub>     | TDF              | ETR    | 0.84               | 0.86 | 6.31 | 1.10               | 6.31 | 6.30 | 6.31               | 1.70 | 7.14 | 7.16 | 8.00                  | 1.07 | 6.28 | 6.44 | 6.40  |
| d4T                  | ABCq             | ATV    | 0.25               | 2.14 | 5.97 | 2.14               | 5.97 | 5.97 | 5.97               | 2.39 | 6.22 | 8.11 | 8.36                  | 2.65 | 6.06 | 7.14 | 7.70  |
| 3TCq                 | NVP              | NFVb   | 2.35               | 4.43 | 2.80 | 4.45               | 3.20 | 4.75 | 4.76               | 6.78 | 5.15 | 7.23 | 9.58                  | 5.74 | 4.40 | 7.44 | 8.58  |
| d4T                  | ddl <sub>q</sub> | LPV/rq | 0.25               | 0.84 | 6.64 | 0.90               | 6.64 | 6.64 | 6.64               | 1.09 | 6.89 | 7.48 | 7.73                  | 1.45 | 6.80 | 7.26 | 7.62  |
| ddl <sub>b</sub>     | RAL              | ATV    | 0.75               | 1.69 | 5.97 | 1.83               | 5.98 | 5.97 | 5.98               | 2.43 | 6.71 | 7.65 | 8.40                  | 2.38 | 6.50 | 8.52 | 8.72  |
| AZTb                 | ENF              | ATV    | 0.37               | 2.07 | 5.97 | 2.07               | 5.97 | 5.98 | 5.98               | 2.44 | 6.33 | 8.04 | 8.40                  | 2.51 | 6.09 | 7.65 | 7.67  |
| d4T                  | TDF              | LPV/rq | 0.25               | 0.86 | 6.64 | 0.87               | 6.64 | 6.64 | 6.64               | 1.11 | 6.89 | 7.50 | 7.75                  | 1.67 | 6.80 | 7.07 | 7.59  |
| FTC                  | ddIEC            | NVP    | 2.79               | 2.56 | 4.43 | 3.19               | 4.48 | 4.57 | 4.61               | 5.35 | 7.22 | 6.99 | 9.78                  | 3.86 | 6.21 | 6.55 | 7.87  |
| AZTb                 | ETR              | EVG/c  | 0.37               | 6.31 | 1.41 | 6.30               | 1.42 | 6.30 | 6.30               | 6.67 | 1.78 | 7.72 | 8.09                  | 7.69 | 1.83 | 7.55 | 10.23 |
| AZTb                 | ddl <sub>b</sub> | LPV/rq | 0.37               | 0.75 | 6.64 | 0.83               | 6.64 | 6.64 | 6.64               | 1.11 | 7.01 | 7.39 | 7.75                  | 1.51 | 7.14 | 7.20 | 7.94  |
| AZTt                 | ENF              | ATV    | 0.39               | 2.07 | 5.97 | 2.07               | 5.97 | 5.98 | 5.98               | 2.46 | 6.36 | 8.04 | 8.43                  | 2.54 | 6.10 | 7.65 | 7.69  |
| AZTt                 | ETR              | EVG/c  | 0.39               | 6.31 | 1.41 | 6.30               | 1.42 | 6.30 | 6.30               | 6.70 | 1.81 | 7.72 | 8.11                  | 7.78 | 1.86 | 7.55 | 10.30 |
| AZTt                 | ddl <sub>b</sub> | LPV/rq | 0.39               | 0.75 | 6.64 | 0.84               | 6.64 | 6.64 | 6.64               | 1.14 | 7.03 | 7.39 | 7.78                  | 1.55 | 7.17 | 7.20 | 7.98  |

| Regimen <sup>a</sup> |        |        | <i>IIP</i> <sub>ave</sub> |      |      |                    |      |      |       |                    |      |      |       |                              |      |      |       |
|----------------------|--------|--------|---------------------------|------|------|--------------------|------|------|-------|--------------------|------|------|-------|------------------------------|------|------|-------|
|                      |        |        | Single drug               |      |      | Loewe <sup>b</sup> |      |      |       | Bliss <sup>c</sup> |      |      |       | <i>DI</i> Index <sup>d</sup> |      |      |       |
| Drug 1               | Drug 2 | Drug 3 | 1                         | 2    | 3    | 1,2                | 1,3  | 2,3  | 1,2,3 | 1,2                | 1,3  | 2,3  | 1,2,3 | 1,2                          | 1,3  | 2,3  | 1,2,3 |
| AZTb                 | ABCq   | ATV    | 0.37                      | 2.14 | 5.97 | 2.14               | 5.97 | 5.97 | 5.97  | 2.51               | 6.33 | 8.11 | 8.48  | 3.07                         | 6.09 | 7.14 | 8.09  |
| ddlq                 | RAL    | ATV    | 0.84                      | 1.69 | 5.97 | 1.85               | 5.98 | 5.97 | 5.98  | 2.53               | 6.80 | 7.65 | 8.49  | 2.47                         | 6.57 | 8.52 | 8.82  |
| AZTf                 | ABCq   | ATV    | 0.39                      | 2.14 | 5.97 | 2.14               | 5.97 | 5.97 | 5.97  | 2.54               | 6.36 | 8.11 | 8.50  | 3.13                         | 6.10 | 7.14 | 8.13  |
| TDF                  | RAL    | ATV    | 0.86                      | 1.69 | 5.97 | 1.69               | 5.97 | 5.97 | 5.97  | 2.55               | 6.83 | 7.65 | 8.51  | 2.71                         | 6.32 | 8.52 | 8.69  |
| AZTb                 | ddlq   | LPV/rq | 0.37                      | 0.84 | 6.64 | 0.91               | 6.64 | 6.64 | 6.64  | 1.21               | 7.01 | 7.48 | 7.85  | 1.61                         | 7.14 | 7.26 | 8.06  |
| d4T                  | 3TCb   | ATV    | 0.25                      | 2.30 | 5.97 | 2.31               | 5.97 | 5.97 | 5.97  | 2.55               | 6.22 | 8.27 | 8.52  | 2.72                         | 6.06 | 6.90 | 7.53  |
| AZTb                 | TDF    | LPV/rq | 0.37                      | 0.86 | 6.64 | 0.87               | 6.64 | 6.64 | 6.64  | 1.23               | 7.01 | 7.50 | 7.87  | 1.92                         | 7.14 | 7.07 | 8.06  |
| AZTt                 | ddlq   | LPV/rq | 0.39                      | 0.84 | 6.64 | 0.92               | 6.64 | 6.64 | 6.64  | 1.23               | 7.03 | 7.48 | 7.87  | 1.66                         | 7.17 | 7.26 | 8.09  |
| AZTt                 | TDF    | LPV/rq | 0.39                      | 0.86 | 6.64 | 0.87               | 6.64 | 6.64 | 6.64  | 1.25               | 7.03 | 7.50 | 7.89  | 1.99                         | 7.17 | 7.07 | 8.10  |
| d4T                  | 3TCq   | ATV    | 0.25                      | 2.35 | 5.97 | 2.35               | 5.97 | 5.97 | 5.97  | 2.60               | 6.22 | 8.32 | 8.57  | 2.77                         | 6.06 | 6.92 | 7.56  |
| d4T                  | ETR    | RAL    | 0.25                      | 6.31 | 1.69 | 6.30               | 1.69 | 6.30 | 6.30  | 6.55               | 1.94 | 7.99 | 8.24  | 6.75                         | 2.00 | 7.73 | 8.80  |
| AZTb                 | d4T    | LPV/rb | 0.37                      | 0.25 | 6.97 | 0.45               | 6.97 | 6.97 | 6.97  | 0.62               | 7.34 | 7.22 | 7.59  | 0.45                         | 7.47 | 7.13 | 7.58  |
| d4T                  | ETR    | MVC    | 0.25                      | 6.31 | 1.72 | 6.30               | 1.73 | 6.30 | 6.30  | 6.55               | 1.97 | 8.03 | 8.28  | 6.75                         | 1.95 | 9.41 | 9.67  |
| AZTt                 | d4T    | LPV/rb | 0.39                      | 0.25 | 6.97 | 0.47               | 6.97 | 6.97 | 6.97  | 0.64               | 7.37 | 7.22 | 7.62  | 0.47                         | 7.51 | 7.13 | 7.61  |
| ddIEC                | NVP    | NFVt   | 2.56                      | 4.43 | 2.76 | 4.57               | 3.48 | 4.73 | 4.84  | 6.99               | 5.32 | 7.19 | 9.75  | 6.55                         | 4.64 | 7.39 | 9.15  |
| ddlB                 | ABCb   | ATV    | 0.75                      | 1.91 | 5.97 | 2.04               | 5.98 | 5.97 | 5.98  | 2.66               | 6.71 | 7.88 | 8.63  | 2.17                         | 6.50 | 7.02 | 7.49  |
| AZTb                 | 3TCb   | ATV    | 0.37                      | 2.30 | 5.97 | 2.30               | 5.97 | 5.97 | 5.97  | 2.67               | 6.33 | 8.27 | 8.64  | 2.91                         | 6.09 | 6.90 | 7.60  |
| AZTt                 | 3TCb   | ATV    | 0.39                      | 2.30 | 5.97 | 2.30               | 5.97 | 5.97 | 5.97  | 2.70               | 6.36 | 8.27 | 8.66  | 2.95                         | 6.10 | 6.90 | 7.62  |
| AZTb                 | 3TCq   | ATV    | 0.37                      | 2.35 | 5.97 | 2.35               | 5.97 | 5.97 | 5.97  | 2.72               | 6.33 | 8.32 | 8.68  | 2.95                         | 6.09 | 6.92 | 7.63  |
| ddIEC                | NVP    | NFVb   | 2.56                      | 4.43 | 2.80 | 4.57               | 3.53 | 4.75 | 4.86  | 6.99               | 5.36 | 7.23 | 9.79  | 6.55                         | 4.69 | 7.44 | 9.19  |
| AZTb                 | ETR    | RAL    | 0.37                      | 6.31 | 1.69 | 6.30               | 1.69 | 6.30 | 6.30  | 6.67               | 2.05 | 7.99 | 8.36  | 7.69                         | 2.07 | 7.73 | 10.72 |
| AZTt                 | 3TCq   | ATV    | 0.39                      | 2.35 | 5.97 | 2.35               | 5.97 | 5.97 | 5.97  | 2.74               | 6.36 | 8.32 | 8.71  | 2.99                         | 6.10 | 6.92 | 7.65  |
| AZTt                 | ETR    | RAL    | 0.39                      | 6.31 | 1.69 | 6.30               | 1.69 | 6.30 | 6.30  | 6.70               | 2.08 | 7.99 | 8.39  | 7.78                         | 2.10 | 7.73 | 10.79 |
| ddlq                 | ABCb   | ATV    | 0.84                      | 1.91 | 5.97 | 2.06               | 5.98 | 5.97 | 5.98  | 2.75               | 6.80 | 7.88 | 8.72  | 2.20                         | 6.57 | 7.02 | 7.54  |
| AZTb                 | ETR    | MVC    | 0.37                      | 6.31 | 1.72 | 6.30               | 1.72 | 6.30 | 6.30  | 6.67               | 2.09 | 8.03 | 8.40  | 7.69                         | 2.06 | 9.41 | 11.52 |
| AZTb                 | ETR    | MVC    | 0.37                      | 6.31 | 1.72 | 6.30               | 1.72 | 6.30 | 6.30  | 6.67               | 2.09 | 8.03 | 8.40  | 7.69                         | 2.06 | 9.41 | 11.52 |
| TDF                  | ABCb   | ATV    | 0.86                      | 1.91 | 5.97 | 1.92               | 5.97 | 5.97 | 5.97  | 2.77               | 6.83 | 7.88 | 8.74  | 1.89                         | 6.32 | 7.02 | 7.13  |
| AZTt                 | ETR    | MVC    | 0.39                      | 6.31 | 1.72 | 6.30               | 1.72 | 6.30 | 6.30  | 6.70               | 2.12 | 8.03 | 8.42  | 7.78                         | 2.09 | 9.41 | 11.59 |
| FTC                  | NVP    | NFVt   | 2.79                      | 4.43 | 2.76 | 4.48               | 3.38 | 4.73 | 4.76  | 7.22               | 5.55 | 7.19 | 9.98  | 6.21                         | 4.99 | 7.39 | 9.15  |
| ddlB                 | ENF    | ATV    | 0.75                      | 2.07 | 5.97 | 2.24               | 5.98 | 5.98 | 5.99  | 2.82               | 6.71 | 8.04 | 8.78  | 2.71                         | 6.50 | 7.65 | 8.16  |
| d4T                  | ABCb   | ETR    | 0.25                      | 1.91 | 6.31 | 1.92               | 6.30 | 6.31 | 6.31  | 2.16               | 6.55 | 8.22 | 8.47  | 2.42                         | 6.75 | 6.62 | 8.79  |
| ddlB                 | ETR    | EVG/c  | 0.75                      | 6.31 | 1.41 | 6.31               | 1.60 | 6.30 | 6.31  | 7.05               | 2.16 | 7.72 | 8.47  | 6.28                         | 2.25 | 7.55 | 7.52  |
| FTC                  | NVP    | NFVb   | 2.79                      | 4.43 | 2.80 | 4.48               | 3.44 | 4.75 | 4.78  | 7.22               | 5.59 | 7.23 | 10.02 | 6.21                         | 5.04 | 7.44 | 9.19  |
| d4T                  | ddIEC  | ATV    | 0.25                      | 2.56 | 5.97 | 2.56               | 5.97 | 6.03 | 6.03  | 2.81               | 6.22 | 8.53 | 8.78  | 3.29                         | 6.06 | 7.81 | 8.81  |
| ddlB                 | ABCq   | ATV    | 0.75                      | 2.14 | 5.97 | 2.24               | 5.98 | 5.97 | 5.98  | 2.89               | 6.71 | 8.11 | 8.86  | 2.38                         | 6.50 | 7.14 | 7.60  |
| ddlq                 | ENF    | ATV    | 0.84                      | 2.07 | 5.97 | 2.26               | 5.98 | 5.98 | 5.99  | 2.91               | 6.80 | 8.04 | 8.88  | 2.79                         | 6.57 | 7.65 | 8.23  |
| ddlq                 | ETR    | EVG/c  | 0.84                      | 6.31 | 1.41 | 6.31               | 1.62 | 6.30 | 6.31  | 7.14               | 2.25 | 7.72 | 8.56  | 6.28                         | 2.36 | 7.55 | 7.59  |
| TDF                  | ENF    | ATV    | 0.86                      | 2.07 | 5.97 | 2.08               | 5.97 | 5.98 | 5.98  | 2.93               | 6.83 | 8.04 | 8.90  | 2.63                         | 6.32 | 7.65 | 7.83  |
| TDF                  | ETR    | EVG/c  | 0.86                      | 6.31 | 1.41 | 6.30               | 1.43 | 6.30 | 6.30  | 7.16               | 2.27 | 7.72 | 8.58  | 6.44                         | 2.24 | 7.55 | 7.69  |
| ddlB                 | TDF    | LPV/rq | 0.75                      | 0.86 | 6.64 | 1.06               | 6.64 | 6.64 | 6.64  | 1.61               | 7.39 | 7.50 | 8.24  | 1.03                         | 7.20 | 7.07 | 7.57  |
| AZTb                 | ABCb   | ETR    | 0.37                      | 1.91 | 6.31 | 1.91               | 6.30 | 6.31 | 6.31  | 2.28               | 6.67 | 8.22 | 8.59  | 2.84                         | 7.69 | 6.62 | 11.24 |
| AZTt                 | ABCb   | ETR    | 0.39                      | 1.91 | 6.31 | 1.91               | 6.30 | 6.31 | 6.31  | 2.31               | 6.70 | 8.22 | 8.61  | 2.91                         | 7.78 | 6.62 | 11.32 |
| AZTb                 | ddIEC  | ATV    | 0.37                      | 2.56 | 5.97 | 2.56               | 5.97 | 6.03 | 6.03  | 2.93               | 6.33 | 8.53 | 8.89  | 3.41                         | 6.09 | 7.81 | 8.59  |
| ddlq                 | ABCq   | ATV    | 0.84                      | 2.14 | 5.97 | 2.25               | 5.98 | 5.97 | 5.98  | 2.98               | 6.80 | 8.11 | 8.95  | 2.41                         | 6.57 | 7.14 | 7.66  |
| d4T                  | ETR    | ENF    | 0.25                      | 6.31 | 2.07 | 6.30               | 2.07 | 6.31 | 6.31  | 6.55               | 2.32 | 8.38 | 8.62  | 6.75                         | 2.33 | 8.20 | 9.27  |
| TDF                  | ABCq   | ATV    | 0.86                      | 2.14 | 5.97 | 2.14               | 5.97 | 5.97 | 5.97  | 3.00               | 6.83 | 8.11 | 8.97  | 2.11                         | 6.32 | 7.14 | 7.22  |
| d4T                  | EVG/c  | LPV/rq | 0.25                      | 1.41 | 6.64 | 1.42               | 6.64 | 6.64 | 6.64  | 1.66               | 6.89 | 8.05 | 8.30  | 1.70                         | 6.80 | 8.86 | 8.57  |
| d4T                  | ddlB   | LPV/rb | 0.25                      | 0.75 | 6.97 | 0.82               | 6.97 | 6.98 | 6.98  | 0.99               | 7.22 | 7.72 | 7.97  | 1.34                         | 7.13 | 7.53 | 7.85  |
| AZTt                 | ddIEC  | ATV    | 0.39                      | 2.56 | 5.97 | 2.56               | 5.97 | 6.03 | 6.03  | 2.95               | 6.36 | 8.53 | 8.92  | 3.46                         | 6.10 | 7.81 | 8.63  |
| ddlq                 | TDF    | LPV/rq | 0.84                      | 0.86 | 6.64 | 1.10               | 6.64 | 6.64 | 6.64  | 1.70               | 7.48 | 7.50 | 8.34  | 1.07                         | 7.26 | 7.07 | 7.63  |
| d4T                  | FTC    | ATV    | 0.25                      | 2.79 | 5.97 | 2.79               | 5.97 | 5.98 | 5.98  | 3.04               | 6.22 | 8.76 | 9.01  | 3.21                         | 6.06 | 7.53 | 8.11  |
| 3TCb                 | ddlB   | ATV    | 2.30                      | 0.75 | 5.97 | 2.39               | 5.97 | 5.98 | 5.98  | 3.05               | 8.27 | 6.71 | 9.02  | 2.55                         | 6.90 | 6.50 | 7.51  |
| d4T                  | ABCq   | ETR    | 0.25                      | 2.14 | 6.31 | 2.14               | 6.30 | 6.31 | 6.31  | 2.39               | 6.55 | 8.45 | 8.70  | 2.65                         | 6.75 | 6.66 | 9.07  |
| d4T                  | ddlq   | LPV/rb | 0.25                      | 0.84 | 6.97 | 0.90               | 6.97 | 6.98 | 6.98  | 1.09               | 7.22 | 7.81 | 8.06  | 1.45                         | 7.13 | 7.60 | 7.95  |
| 3TCq                 | ddlB   | ATV    | 2.35                      | 0.75 | 5.97 | 2.44               | 5.97 | 5.98 | 5.98  | 3.10               | 8.32 | 6.71 | 9.06  | 2.59                         | 6.92 | 6.50 | 7.53  |
| ddlB                 | ETR    | RAL    | 0.75                      | 6.31 | 1.69 | 6.31               | 1.83 | 6.30 | 6.31  | 7.05               | 2.43 | 7.99 | 8.74  | 6.28                         | 2.38 | 7.73 | 7.56  |
| AZTb                 | ETR    | ENF    | 0.37                      | 6.31 | 2.07 | 6.30               | 2.07 | 6.31 | 6.31  | 6.67               | 2.44 | 8.38 | 8.74  | 7.69                         | 2.51 | 8.20 | 11.51 |
| d4T                  | TDF    | LPV/rb | 0.25                      | 0.86 | 6.97 | 0.87               | 6.97 | 6.97 | 6.97  | 1.11               | 7.22 | 7.83 | 8.08  | 1.67                         | 7.13 | 7.41 | 7.91  |
| AZTb                 | EVG/c  | LPV/rq | 0.37                      | 1.41 | 6.64 | 1.42               | 6.64 | 6.64 | 6.64  | 1.78               | 7.01 | 8.05 | 8.42  | 1.84                         | 7.14 | 8.86 | 9.21  |
| AZTb                 | ddlB   | LPV/rb | 0.37                      | 0.75 | 6.97 | 0.83               | 6.97 | 6.98 | 6.98  | 1.11               | 7.34 | 7.72 | 8.09  | 1.51                         | 7.47 | 7.53 | 8.27  |
| AZTt                 | ETR    | ENF    | 0.39                      | 6.31 | 2.07 | 6.30               | 2.07 | 6.31 | 6.31  | 6.70               | 2.46 | 8.38 | 8.77  | 7.78                         | 2.54 | 8.20 | 11.57 |
| ddlB                 | ETR    | MVC    | 0.75                      | 6.31 | 1.72 | 6.31               | 1.83 | 6.30 | 6.31  | 7.05               | 2.47 | 8.03 | 8.77  | 6.28                         | 2.54 | 9.41 | 8.95  |
| AZTt                 | EVG/c  | LPV/rq | 0.39                      | 1.41 | 6.64 | 1.42               | 6.64 | 6.64 | 6.64  | 1.81               | 7.03 | 8.05 | 8.45  | 1.87                         | 7.17 | 8.86 | 9.25  |
| AZTt                 | ddlB   | LPV/rb | 0.39                      | 0.75 | 6.97 | 0.84               | 6.97 | 6.98 | 6.98  | 1.14               | 7.37 | 7.72 | 8.11  | 1.55                         | 7.51 | 7.53 | 8.30  |
| 3TCb                 | ddlq   | ATV    | 2.30                      | 0.84 | 5.97 | 2.41               | 5.97 | 5.98 | 5.98  | 3.14               | 8.27 | 6.80 | 9.11  | 2.58                         | 6.90 | 6.57 | 7.56  |
| 3TCb                 | TDF    | ATV    | 2.30                      | 0.86 | 5.97 | 2.30               | 5.97 | 5.97 | 5.97  | 3.16               | 8.27 | 6.83 | 9.13  | 2.97                         | 6.90 | 6.32 | 7.48  |
| AZTb                 | FTC    | ATV    | 0.37                      | 2.79 | 5.97 | 2.79               | 5.97 | 5.98 | 5.98  | 3.16               | 6.33 | 8.76 | 9.12  | 3.55                         | 6.09 | 7.53 | 8.49  |
| AZTb                 | ABCq   | ETR    | 0.37                      | 2.14 | 6.31 | 2.14               | 6.30 | 6.31 | 6.31  | 2.51               | 6.67 | 8.45 | 8.82  | 3.07                         | 7.69 | 6.66 | 11.74 |
| AZTt                 | FTC    | ATV    | 0.39                      | 2.79 | 5.97 | 2.79               | 5.97 | 5.98 | 5.98  | 3.18               | 6.36 | 8.76 | 9.15  | 3.60                         | 6.10 | 7.53 | 8.53  |
| 3TCq                 | ddlq   | ATV    | 2.35                      | 0.84 | 5.97 | 2.45               | 5.97 | 5.98 | 5.98  | 3.19               | 8.32 | 6.80 | 9.15  | 2.62                         | 6.92 | 6.57 | 7.58  |

| Regimen <sup>a</sup> |        |        | IIP <sub>ave</sub> |      |      |                    |      |      |       |                    |      |      |       |                       |      |       |       |
|----------------------|--------|--------|--------------------|------|------|--------------------|------|------|-------|--------------------|------|------|-------|-----------------------|------|-------|-------|
|                      |        |        | Single drug        |      |      | Loewe <sup>b</sup> |      |      |       | Bliss <sup>c</sup> |      |      |       | DI Index <sup>d</sup> |      |       |       |
| Drug 1               | Drug 2 | Drug 3 | 1                  | 2    | 3    | 1,2                | 1,3  | 2,3  | 1,2,3 | 1,2                | 1,3  | 2,3  | 1,2,3 | 1,2                   | 1,3  | 2,3   | 1,2,3 |
| ddIq                 | ETR    | RAL    | 0.84               | 6.31 | 1.69 | 6.31               | 1.85 | 6.30 | 6.31  | 7.14               | 2.53 | 7.99 | 8.83  | 6.28                  | 2.47 | 7.73  | 7.62  |
| 3TCq                 | TDF    | ATV    | 2.35               | 0.86 | 5.97 | 2.35               | 5.97 | 5.97 | 5.97  | 3.21               | 8.32 | 6.83 | 9.18  | 3.02                  | 6.92 | 6.32  | 7.50  |
| AZTt                 | ABCq   | ETR    | 0.39               | 2.14 | 6.31 | 2.14               | 6.30 | 6.31 | 6.31  | 2.54               | 6.70 | 8.45 | 8.84  | 3.13                  | 7.78 | 6.66  | 11.82 |
| AZTb                 | ddIq   | LPV/rb | 0.37               | 0.84 | 6.97 | 0.91               | 6.97 | 6.98 | 6.98  | 1.21               | 7.34 | 7.81 | 8.18  | 1.61                  | 7.47 | 7.60  | 8.39  |
| TDF                  | ETR    | RAL    | 0.86               | 6.31 | 1.69 | 6.30               | 1.69 | 6.30 | 6.30  | 7.16               | 2.55 | 7.99 | 8.85  | 6.44                  | 2.71 | 7.73  | 7.93  |
| d4T                  | 3TCb   | ETR    | 0.25               | 2.30 | 6.31 | 2.31               | 6.30 | 6.31 | 6.31  | 2.55               | 6.55 | 8.61 | 8.86  | 2.72                  | 6.75 | 6.86  | 9.17  |
| AZTb                 | TDF    | LPV/rb | 0.37               | 0.86 | 6.97 | 0.87               | 6.97 | 6.97 | 6.97  | 1.23               | 7.34 | 7.83 | 8.20  | 1.92                  | 7.47 | 7.41  | 8.38  |
| ddIq                 | ETR    | MVC    | 0.84               | 6.31 | 1.72 | 6.31               | 1.85 | 6.30 | 6.31  | 7.14               | 2.56 | 8.03 | 8.87  | 6.28                  | 2.64 | 9.41  | 9.06  |
| AZTt                 | ddIq   | LPV/rb | 0.39               | 0.84 | 6.97 | 0.92               | 6.97 | 6.98 | 6.98  | 1.23               | 7.37 | 7.81 | 8.20  | 1.66                  | 7.51 | 7.60  | 8.42  |
| TDF                  | ETR    | MVC    | 0.86               | 6.31 | 1.72 | 6.30               | 1.73 | 6.30 | 6.30  | 7.16               | 2.58 | 8.03 | 8.89  | 6.44                  | 2.95 | 9.41  | 9.35  |
| AZTt                 | TDF    | LPV/rb | 0.39               | 0.86 | 6.97 | 0.87               | 6.97 | 6.97 | 6.97  | 1.25               | 7.37 | 7.83 | 8.23  | 1.99                  | 7.51 | 7.41  | 8.42  |
| d4T                  | 3TCq   | ETR    | 0.25               | 2.35 | 6.31 | 2.35               | 6.30 | 6.31 | 6.31  | 2.60               | 6.55 | 8.65 | 8.90  | 2.77                  | 6.75 | 6.87  | 9.23  |
| d4T                  | RAL    | LPV/rq | 0.25               | 1.69 | 6.64 | 1.69               | 6.64 | 6.64 | 6.64  | 1.94               | 6.89 | 8.33 | 8.58  | 2.01                  | 6.80 | 8.86  | 8.68  |
| d4T                  | LPV/rq | MVC    | 0.25               | 6.64 | 1.72 | 6.64               | 1.73 | 6.64 | 6.64  | 6.89               | 1.97 | 8.36 | 8.61  | 6.80                  | 1.95 | 6.64  | 7.42  |
| ABCb                 | EVG/c  | ATV    | 1.91               | 1.41 | 5.97 | 2.02               | 5.97 | 5.97 | 5.97  | 3.33               | 7.88 | 7.38 | 9.30  | 3.39                  | 7.02 | 8.10  | 9.49  |
| ddlB                 | ABCb   | ETR    | 0.75               | 1.91 | 6.31 | 2.04               | 6.31 | 6.31 | 6.31  | 2.66               | 7.05 | 8.22 | 8.97  | 2.17                  | 6.28 | 6.62  | 6.54  |
| AZTb                 | 3TCb   | ETR    | 0.37               | 2.30 | 6.31 | 2.30               | 6.30 | 6.31 | 6.31  | 2.67               | 6.67 | 8.61 | 8.98  | 2.91                  | 7.69 | 6.86  | 11.71 |
| AZTt                 | 3TCb   | ETR    | 0.39               | 2.30 | 6.31 | 2.30               | 6.30 | 6.31 | 6.31  | 2.70               | 6.70 | 8.61 | 9.00  | 2.95                  | 7.78 | 6.86  | 11.78 |
| AZTb                 | d4T    | EFV    | 0.37               | 0.25 | 7.35 | 0.45               | 7.35 | 7.35 | 7.35  | 0.62               | 7.72 | 7.60 | 7.97  | 0.45                  | 8.91 | 8.00  | 9.46  |
| AZTb                 | 3TCq   | ETR    | 0.37               | 2.35 | 6.31 | 2.35               | 6.30 | 6.31 | 6.31  | 2.72               | 6.67 | 8.65 | 9.02  | 2.95                  | 7.69 | 6.87  | 11.79 |
| AZTb                 | RAL    | LPV/rq | 0.37               | 1.69 | 6.64 | 1.69               | 6.64 | 6.64 | 6.64  | 2.05               | 7.01 | 8.33 | 8.69  | 2.08                  | 7.14 | 8.86  | 9.32  |
| AZTt                 | d4T    | EFV    | 0.39               | 0.25 | 7.35 | 0.47               | 7.35 | 7.35 | 7.35  | 0.64               | 7.75 | 7.60 | 8.00  | 0.47                  | 9.02 | 8.00  | 9.54  |
| AZTt                 | 3TCq   | ETR    | 0.39               | 2.35 | 6.31 | 2.35               | 6.30 | 6.31 | 6.31  | 2.74               | 6.70 | 8.65 | 9.05  | 2.99                  | 7.78 | 6.87  | 11.86 |
| AZTt                 | RAL    | LPV/rq | 0.39               | 1.69 | 6.64 | 1.69               | 6.64 | 6.64 | 6.64  | 2.08               | 7.03 | 8.33 | 8.72  | 2.11                  | 7.17 | 8.86  | 9.36  |
| ddIq                 | ABCb   | ETR    | 0.84               | 1.91 | 6.31 | 2.06               | 6.31 | 6.31 | 6.31  | 2.75               | 7.14 | 8.22 | 9.06  | 2.20                  | 6.28 | 6.62  | 6.55  |
| AZTb                 | LPV/rq | MVC    | 0.37               | 6.64 | 1.72 | 6.64               | 1.72 | 6.64 | 6.64  | 7.01               | 2.09 | 8.36 | 8.73  | 7.14                  | 2.06 | 6.64  | 8.18  |
| TDF                  | ABCb   | ETR    | 0.86               | 1.91 | 6.31 | 1.92               | 6.30 | 6.31 | 6.31  | 2.77               | 7.16 | 8.22 | 9.08  | 1.89                  | 6.44 | 6.62  | 6.69  |
| AZTt                 | LPV/rq | MVC    | 0.39               | 6.64 | 1.72 | 6.64               | 1.72 | 6.64 | 6.64  | 7.03               | 2.12 | 8.36 | 8.76  | 7.17                  | 2.09 | 6.64  | 8.20  |
| ddIEC                | TDF    | ATV    | 2.56               | 0.86 | 5.97 | 2.56               | 6.03 | 5.97 | 6.03  | 3.42               | 8.53 | 6.83 | 9.39  | 2.51                  | 7.81 | 6.32  | 7.65  |
| ENF                  | EVG/c  | ATV    | 2.07               | 1.41 | 5.97 | 2.20               | 5.98 | 5.97 | 5.98  | 3.48               | 8.04 | 7.38 | 9.45  | 3.46                  | 7.65 | 8.10  | 9.92  |
| ddlB                 | ETR    | ENF    | 0.75               | 6.31 | 2.07 | 6.31               | 2.24 | 6.31 | 6.31  | 7.05               | 2.82 | 8.38 | 9.12  | 6.28                  | 2.71 | 8.20  | 7.88  |
| d4T                  | ABCb   | LPV/rq | 0.25               | 1.91 | 6.64 | 1.92               | 6.64 | 6.64 | 6.64  | 2.16               | 6.89 | 8.55 | 8.80  | 2.42                  | 6.80 | 7.67  | 8.35  |
| ddlB                 | EVG/c  | LPV/rq | 0.75               | 1.41 | 6.64 | 1.60               | 6.64 | 6.64 | 6.64  | 2.16               | 7.39 | 8.05 | 8.80  | 2.25                  | 7.20 | 8.86  | 9.22  |
| d4T                  | ddIEC  | ETR    | 0.25               | 2.56 | 6.31 | 2.56               | 6.30 | 6.33 | 6.33  | 2.81               | 6.55 | 8.87 | 9.11  | 3.29                  | 6.75 | 6.24  | 10.02 |
| ABCq                 | EVG/c  | ATV    | 2.14               | 1.41 | 5.97 | 2.20               | 5.97 | 5.97 | 5.97  | 3.56               | 8.11 | 7.38 | 9.52  | 3.62                  | 7.14 | 8.10  | 9.72  |
| FTC                  | ddlB   | ATV    | 2.79               | 0.75 | 5.97 | 2.85               | 5.98 | 5.98 | 5.99  | 3.54               | 8.76 | 6.71 | 9.50  | 3.06                  | 7.53 | 6.50  | 8.00  |
| AZTb                 | d4T    | ATV/r  | 0.37               | 0.25 | 7.44 | 0.45               | 7.44 | 7.44 | 7.44  | 0.62               | 7.81 | 7.69 | 8.06  | 0.45                  | 7.57 | 7.53  | 7.65  |
| ddlB                 | ABCq   | ETR    | 0.75               | 2.14 | 6.31 | 2.24               | 6.31 | 6.31 | 6.31  | 2.89               | 7.05 | 8.45 | 9.19  | 2.38                  | 6.28 | 6.66  | 6.57  |
| AZTt                 | d4T    | ATV/r  | 0.39               | 0.25 | 7.44 | 0.47               | 7.44 | 7.44 | 7.44  | 0.64               | 7.84 | 7.69 | 8.08  | 0.47                  | 7.58 | 7.53  | 7.66  |
| ddIq                 | ETR    | ENF    | 0.84               | 6.31 | 2.07 | 6.31               | 2.26 | 6.31 | 6.31  | 7.14               | 2.91 | 8.38 | 9.21  | 6.28                  | 2.79 | 8.20  | 7.93  |
| ABCb                 | RAL    | ATV    | 1.91               | 1.69 | 5.97 | 2.10               | 5.97 | 5.97 | 5.97  | 3.60               | 7.88 | 7.65 | 9.57  | 3.45                  | 7.02 | 8.52  | 9.74  |
| ddIq                 | EVG/c  | LPV/rq | 0.84               | 1.41 | 6.64 | 1.62               | 6.64 | 6.64 | 6.64  | 2.25               | 7.48 | 8.05 | 8.89  | 2.36                  | 7.26 | 8.86  | 9.33  |
| TDF                  | ETR    | ENF    | 0.86               | 6.31 | 2.07 | 6.30               | 2.08 | 6.31 | 6.31  | 7.16               | 2.93 | 8.38 | 9.23  | 6.44                  | 2.62 | 8.20  | 8.05  |
| TDF                  | EVG/c  | LPV/rq | 0.86               | 1.41 | 6.64 | 1.43               | 6.64 | 6.64 | 6.64  | 2.27               | 7.50 | 8.05 | 8.91  | 2.25                  | 7.07 | 8.86  | 9.10  |
| ddlB                 | TDF    | LPV/rb | 0.75               | 0.86 | 6.97 | 1.06               | 6.98 | 6.97 | 6.98  | 1.61               | 7.72 | 7.83 | 8.58  | 1.03                  | 7.53 | 7.41  | 7.91  |
| AZTb                 | ABCb   | LPV/rq | 0.37               | 1.91 | 6.64 | 1.91               | 6.64 | 6.64 | 6.64  | 2.28               | 7.01 | 8.55 | 8.92  | 2.84                  | 7.14 | 7.67  | 9.36  |
| AZTb                 | ddIEC  | ETR    | 0.37               | 2.56 | 6.31 | 2.56               | 6.30 | 6.33 | 6.33  | 2.93               | 6.67 | 8.87 | 9.23  | 3.41                  | 7.69 | 6.24  | 12.43 |
| AZTt                 | ABCb   | LPV/rq | 0.39               | 1.91 | 6.64 | 1.91               | 6.64 | 6.64 | 6.64  | 2.31               | 7.03 | 8.55 | 8.95  | 2.91                  | 7.17 | 7.67  | 9.40  |
| FTC                  | ddIq   | ATV    | 2.79               | 0.84 | 5.97 | 2.86               | 5.98 | 5.98 | 5.99  | 3.63               | 8.76 | 6.80 | 9.59  | 3.10                  | 7.53 | 6.57  | 8.06  |
| AZTt                 | ddIEC  | ETR    | 0.39               | 2.56 | 6.31 | 2.56               | 6.30 | 6.33 | 6.33  | 2.95               | 6.70 | 8.87 | 9.26  | 3.46                  | 7.78 | 6.24  | 12.51 |
| ddIq                 | ABCq   | ETR    | 0.84               | 2.14 | 6.31 | 2.25               | 6.31 | 6.31 | 6.31  | 2.98               | 7.14 | 8.45 | 9.29  | 2.41                  | 6.28 | 6.66  | 6.58  |
| FTC                  | TDF    | ATV    | 2.79               | 0.86 | 5.97 | 2.79               | 5.98 | 5.97 | 5.98  | 3.65               | 8.76 | 6.83 | 9.62  | 3.07                  | 7.53 | 6.32  | 7.67  |
| d4T                  | ENF    | LPV/rq | 0.25               | 2.07 | 6.64 | 2.07               | 6.64 | 6.64 | 6.64  | 2.32               | 6.89 | 8.71 | 8.96  | 2.34                  | 6.80 | 7.88  | 8.22  |
| d4T                  | EVG/c  | LPV/rb | 0.25               | 1.41 | 6.97 | 1.42               | 6.97 | 6.97 | 6.97  | 1.66               | 7.22 | 8.39 | 8.64  | 1.70                  | 7.13 | 9.19  | 8.90  |
| TDF                  | ABCq   | ETR    | 0.86               | 2.14 | 6.31 | 2.14               | 6.30 | 6.31 | 6.31  | 3.00               | 7.16 | 8.45 | 9.31  | 2.11                  | 6.44 | 6.66  | 6.71  |
| ddIq                 | TDF    | LPV/rb | 0.84               | 0.86 | 6.97 | 1.10               | 6.98 | 6.97 | 6.98  | 1.70               | 7.81 | 7.83 | 8.67  | 1.07                  | 7.60 | 7.41  | 7.96  |
| d4T                  | FTC    | ETR    | 0.25               | 2.79 | 6.31 | 2.79               | 6.30 | 6.31 | 6.31  | 3.04               | 6.55 | 9.10 | 9.34  | 3.21                  | 6.75 | 6.83  | 9.71  |
| 3TCb                 | EVG/c  | ATV    | 2.30               | 1.41 | 5.97 | 2.35               | 5.97 | 5.97 | 5.97  | 3.72               | 8.27 | 7.38 | 9.69  | 4.06                  | 6.90 | 8.10  | 9.88  |
| 3TCb                 | ddlB   | ETR    | 2.30               | 0.75 | 6.31 | 2.39               | 6.31 | 6.31 | 6.31  | 3.05               | 8.61 | 7.05 | 9.36  | 2.55                  | 6.86 | 6.28  | 6.70  |
| d4T                  | ABCq   | LPV/rq | 0.25               | 2.14 | 6.64 | 2.14               | 6.64 | 6.64 | 6.64  | 2.39               | 6.89 | 8.78 | 9.03  | 2.65                  | 6.80 | 7.79  | 8.56  |
| 3TCq                 | EVG/c  | ATV    | 2.35               | 1.41 | 5.97 | 2.39               | 5.97 | 5.97 | 5.97  | 3.76               | 8.32 | 7.38 | 9.73  | 4.10                  | 6.92 | 8.10  | 9.92  |
| d4T                  | ddlB   | EFV    | 0.25               | 0.75 | 7.35 | 0.82               | 7.35 | 7.35 | 7.35  | 0.99               | 7.60 | 8.10 | 8.35  | 1.34                  | 8.00 | 7.77  | 9.05  |
| ENF                  | RAL    | ATV    | 2.07               | 1.69 | 5.97 | 2.29               | 5.98 | 5.97 | 5.98  | 3.76               | 8.04 | 7.65 | 9.72  | 3.96                  | 7.65 | 8.52  | 10.37 |
| 3TCq                 | ddlB   | ETR    | 2.35               | 0.75 | 6.31 | 2.44               | 6.31 | 6.31 | 6.31  | 3.10               | 8.65 | 7.05 | 9.40  | 2.59                  | 6.87 | 6.28  | 6.71  |
| d4T                  | ETR    | NFVt   | 0.25               | 6.31 | 2.76 | 6.30               | 2.76 | 6.40 | 6.40  | 6.55               | 3.01 | 9.06 | 9.31  | 6.75                  | 2.92 | 10.37 | 10.68 |
| ddlB                 | RAL    | LPV/rq | 0.75               | 1.69 | 6.64 | 1.83               | 6.64 | 6.64 | 6.64  | 2.43               | 7.39 | 8.33 | 9.07  | 2.38                  | 7.20 | 8.86  | 9.18  |
| AZTb                 | ENF    | LPV/rq | 0.37               | 2.07 | 6.64 | 2.07               | 6.64 | 6.64 | 6.64  | 2.44               | 7.01 | 8.71 | 9.08  | 2.51                  | 7.14 | 7.88  | 9.07  |
| AZTb                 | EVG/c  | LPV/rb | 0.37               | 1.41 | 6.97 | 1.42               | 6.97 | 6.97 | 6.97  | 1.78               | 7.34 | 8.39 | 8.76  | 1.84                  | 7.47 | 9.19  | 9.55  |
| AZTt                 | ENF    | LPV/rq | 0.39               | 2.07 | 6.64 | 2.07               | 6.64 | 6.64 | 6.64  | 2.46               | 7.03 | 8.71 | 9.10  | 2.54                  | 7.17 | 7.88  | 9.09  |
| ETR                  | EVG/c  | MVC    | 6.31               | 1.41 | 1.72 | 6.30               | 6.30 | 1.84 | 6.30  | 7.72               | 8.03 | 3.14 | 9.44  | 7.55                  | 9.41 | 3.20  | 10.50 |

| Regimen <sup>a</sup> |                    |                    | <i>HP</i> <sub>ave</sub> |      |      |                    |      |      |       |                    |      |      |       |                              |      |       |       |
|----------------------|--------------------|--------------------|--------------------------|------|------|--------------------|------|------|-------|--------------------|------|------|-------|------------------------------|------|-------|-------|
|                      |                    |                    | Single drug              |      |      | Loewe <sup>b</sup> |      |      |       | Bliss <sup>c</sup> |      |      |       | <i>DI</i> Index <sup>d</sup> |      |       |       |
| Drug 1               | Drug 2             | Drug 3             | 1                        | 2    | 3    | 1,2                | 1,3  | 2,3  | 1,2,3 | 1,2                | 1,3  | 2,3  | 1,2,3 | 1,2                          | 1,3  | 2,3   | 1,2,3 |
| ddl <sub>b</sub>     | LPV/r <sub>q</sub> | MVC                | 0.75                     | 6.64 | 1.72 | 6.64               | 1.83 | 6.64 | 6.64  | 7.39               | 2.47 | 8.36 | 9.11  | 7.20                         | 2.54 | 6.64  | 7.88  |
| AZT <sub>t</sub>     | EVG/c              | LPV/r <sub>b</sub> | 0.39                     | 1.41 | 6.97 | 1.42               | 6.97 | 6.97 | 6.97  | 1.81               | 7.37 | 8.39 | 8.78  | 1.87                         | 7.51 | 9.19  | 9.58  |
| 3TC <sub>b</sub>     | ddl <sub>q</sub>   | ETR                | 2.30                     | 0.84 | 6.31 | 2.41               | 6.31 | 6.31 | 6.31  | 3.14               | 8.61 | 7.14 | 9.45  | 2.58                         | 6.86 | 6.28  | 6.72  |
| ABC <sub>q</sub>     | RAL                | ATV                | 2.14                     | 1.69 | 5.97 | 2.26               | 5.97 | 5.97 | 5.97  | 3.83               | 8.11 | 7.65 | 9.80  | 3.68                         | 7.14 | 8.52  | 9.96  |
| d4T                  | ETR                | NFV <sub>b</sub>   | 0.25                     | 6.31 | 2.80 | 6.30               | 2.80 | 6.41 | 6.41  | 6.55               | 3.05 | 9.11 | 9.36  | 6.75                         | 2.96 | 10.43 | 10.73 |
| AZT <sub>b</sub>     | FTC                | ETR                | 0.37                     | 2.79 | 6.31 | 2.79               | 6.30 | 6.31 | 6.31  | 3.16               | 6.67 | 9.10 | 9.46  | 3.55                         | 7.69 | 6.83  | 12.86 |
| 3TC <sub>b</sub>     | TDF                | ETR                | 2.30                     | 0.86 | 6.31 | 2.30               | 6.31 | 6.30 | 6.31  | 3.16               | 8.61 | 7.16 | 9.47  | 2.97                         | 6.86 | 6.44  | 7.27  |
| AZT <sub>b</sub>     | ABC <sub>q</sub>   | LPV/r <sub>q</sub> | 0.37                     | 2.14 | 6.64 | 2.14               | 6.64 | 6.64 | 6.64  | 2.51               | 7.01 | 8.78 | 9.15  | 3.07                         | 7.14 | 7.79  | 9.66  |
| AZT <sub>t</sub>     | FTC                | ETR                | 0.39                     | 2.79 | 6.31 | 2.79               | 6.30 | 6.31 | 6.31  | 3.18               | 6.70 | 9.10 | 9.49  | 3.60                         | 7.78 | 6.83  | 12.94 |
| d4T                  | ddl <sub>q</sub>   | EFV                | 0.25                     | 0.84 | 7.35 | 0.90               | 7.35 | 7.36 | 7.36  | 1.09               | 7.60 | 8.19 | 8.44  | 1.45                         | 8.00 | 7.82  | 9.21  |
| 3TC <sub>q</sub>     | ddl <sub>q</sub>   | ETR                | 2.35                     | 0.84 | 6.31 | 2.45               | 6.31 | 6.31 | 6.31  | 3.19               | 8.65 | 7.14 | 9.49  | 2.62                         | 6.87 | 6.28  | 6.73  |
| ddl <sub>q</sub>     | RAL                | LPV/r <sub>q</sub> | 0.84                     | 1.69 | 6.64 | 1.85               | 6.64 | 6.64 | 6.64  | 2.53               | 7.48 | 8.33 | 9.17  | 2.47                         | 7.26 | 8.86  | 9.27  |
| d4T                  | TDF                | EFV                | 0.25                     | 0.86 | 7.35 | 0.87               | 7.35 | 7.35 | 7.35  | 1.11               | 7.60 | 8.21 | 8.46  | 1.67                         | 8.00 | 7.97  | 9.36  |
| AZT <sub>t</sub>     | ABC <sub>q</sub>   | LPV/r <sub>q</sub> | 0.39                     | 2.14 | 6.64 | 2.14               | 6.64 | 6.64 | 6.64  | 2.54               | 7.03 | 8.78 | 9.18  | 3.13                         | 7.17 | 7.79  | 9.70  |
| 3TC <sub>q</sub>     | TDF                | ETR                | 2.35                     | 0.86 | 6.31 | 2.35               | 6.31 | 6.30 | 6.31  | 3.21               | 8.65 | 7.16 | 9.51  | 3.02                         | 6.87 | 6.44  | 7.29  |
| AZT <sub>b</sub>     | ddl <sub>b</sub>   | EFV                | 0.37                     | 0.75 | 7.35 | 0.83               | 7.35 | 7.35 | 7.35  | 1.11               | 7.72 | 8.10 | 8.47  | 1.51                         | 8.91 | 7.77  | 10.14 |
| TDF                  | RAL                | LPV/r <sub>q</sub> | 0.86                     | 1.69 | 6.64 | 1.69               | 6.64 | 6.64 | 6.64  | 2.55               | 7.50 | 8.33 | 9.19  | 2.71                         | 7.07 | 8.86  | 9.16  |
| d4T                  | 3TC <sub>b</sub>   | LPV/r <sub>q</sub> | 0.25                     | 2.30 | 6.64 | 2.31               | 6.64 | 6.64 | 6.64  | 2.55               | 6.89 | 8.94 | 9.19  | 2.72                         | 6.80 | 7.77  | 8.51  |
| AZT <sub>b</sub>     | ETR                | NFV <sub>t</sub>   | 0.37                     | 6.31 | 2.76 | 6.30               | 2.76 | 6.40 | 6.40  | 6.67               | 3.12 | 9.06 | 9.43  | 7.69                         | 3.20 | 10.37 | 13.25 |
| ddl <sub>q</sub>     | LPV/r <sub>q</sub> | MVC                | 0.84                     | 6.64 | 1.72 | 6.64               | 1.85 | 6.64 | 6.64  | 7.48               | 2.56 | 8.36 | 9.20  | 7.26                         | 2.64 | 6.64  | 7.94  |
| AZT <sub>t</sub>     | ddl <sub>b</sub>   | EFV                | 0.39                     | 0.75 | 7.35 | 0.84               | 7.35 | 7.35 | 7.35  | 1.14               | 7.75 | 8.10 | 8.49  | 1.55                         | 9.02 | 7.77  | 10.21 |
| AZT <sub>t</sub>     | ETR                | NFV <sub>t</sub>   | 0.39                     | 6.31 | 2.76 | 6.30               | 2.76 | 6.40 | 6.40  | 6.70               | 3.15 | 9.06 | 9.45  | 7.78                         | 3.23 | 10.37 | 13.32 |
| TDF                  | LPV/r <sub>q</sub> | MVC                | 0.86                     | 6.64 | 1.72 | 6.64               | 1.73 | 6.64 | 6.64  | 7.50               | 2.58 | 8.36 | 9.22  | 7.07                         | 2.95 | 6.64  | 7.85  |
| d4T                  | 3TC <sub>q</sub>   | LPV/r <sub>q</sub> | 0.25                     | 2.35 | 6.64 | 2.35               | 6.64 | 6.64 | 6.64  | 2.60               | 6.89 | 8.99 | 9.24  | 2.77                         | 6.80 | 7.79  | 8.55  |
| d4T                  | ddl <sub>b</sub>   | ATV/r              | 0.25                     | 0.75 | 7.44 | 0.82               | 7.44 | 7.44 | 7.44  | 0.99               | 7.69 | 8.19 | 8.44  | 1.34                         | 7.53 | 7.97  | 8.17  |
| d4T                  | RAL                | LPV/r <sub>b</sub> | 0.25                     | 1.69 | 6.97 | 1.69               | 6.97 | 6.97 | 6.97  | 1.94               | 7.22 | 8.66 | 8.91  | 2.01                         | 7.13 | 9.20  | 9.00  |
| AZT <sub>b</sub>     | ETR                | NFV <sub>b</sub>   | 0.37                     | 6.31 | 2.80 | 6.30               | 2.80 | 6.41 | 6.41  | 6.67               | 3.17 | 9.11 | 9.47  | 7.69                         | 3.25 | 10.43 | 13.31 |
| AZT <sub>t</sub>     | ETR                | NFV <sub>b</sub>   | 0.39                     | 6.31 | 2.80 | 6.30               | 2.80 | 6.41 | 6.41  | 6.70               | 3.19 | 9.11 | 9.50  | 7.78                         | 3.28 | 10.43 | 13.38 |
| AZT <sub>b</sub>     | ddl <sub>q</sub>   | EFV                | 0.37                     | 0.84 | 7.35 | 0.91               | 7.35 | 7.36 | 7.36  | 1.21               | 7.72 | 8.19 | 8.56  | 1.61                         | 8.91 | 7.82  | 10.36 |
| 3TC <sub>b</sub>     | RAL                | ATV                | 2.30                     | 1.69 | 5.97 | 2.39               | 5.97 | 5.97 | 5.97  | 3.99               | 8.27 | 7.65 | 9.96  | 4.00                         | 6.90 | 8.52  | 10.02 |
| ABC <sub>b</sub>     | ENF                | ATV                | 1.91                     | 2.07 | 5.97 | 2.41               | 5.97 | 5.98 | 5.98  | 3.98               | 7.88 | 8.04 | 9.95  | 3.62                         | 7.02 | 7.65  | 8.77  |
| AZT <sub>b</sub>     | TDF                | EFV                | 0.37                     | 0.86 | 7.35 | 0.87               | 7.35 | 7.35 | 7.35  | 1.23               | 7.72 | 8.21 | 8.58  | 1.92                         | 8.91 | 7.97  | 10.54 |
| ABC <sub>b</sub>     | ETR                | EVG/c              | 1.91                     | 6.31 | 1.41 | 6.31               | 2.02 | 6.30 | 6.31  | 8.22               | 3.33 | 7.72 | 9.63  | 6.62                         | 3.39 | 7.55  | 8.44  |
| AZT <sub>t</sub>     | ddl <sub>q</sub>   | EFV                | 0.39                     | 0.84 | 7.35 | 0.92               | 7.35 | 7.36 | 7.36  | 1.23               | 7.75 | 8.19 | 8.58  | 1.66                         | 9.02 | 7.82  | 10.43 |
| ddl <sub>b</sub>     | ABC <sub>b</sub>   | LPV/r <sub>q</sub> | 0.75                     | 1.91 | 6.64 | 2.04               | 6.64 | 6.64 | 6.64  | 2.66               | 7.39 | 8.55 | 9.30  | 2.17                         | 7.20 | 7.67  | 8.19  |
| AZT <sub>b</sub>     | 3TC <sub>b</sub>   | LPV/r <sub>q</sub> | 0.37                     | 2.30 | 6.64 | 2.30               | 6.64 | 6.64 | 6.64  | 2.67               | 7.01 | 8.94 | 9.31  | 2.91                         | 7.14 | 7.77  | 9.39  |
| AZT <sub>t</sub>     | TDF                | EFV                | 0.39                     | 0.86 | 7.35 | 0.87               | 7.35 | 7.35 | 7.35  | 1.25               | 7.75 | 8.21 | 8.61  | 1.99                         | 9.02 | 7.97  | 10.62 |
| ddl <sub>EC</sub>    | EVG/c              | ATV                | 2.56                     | 1.41 | 5.97 | 2.60               | 6.03 | 5.97 | 6.03  | 3.97               | 8.53 | 7.38 | 9.94  | 4.20                         | 7.81 | 8.10  | 10.44 |
| 3TC <sub>q</sub>     | RAL                | ATV                | 2.35                     | 1.69 | 5.97 | 2.44               | 5.97 | 5.97 | 5.97  | 4.04               | 8.32 | 7.65 | 10.00 | 4.04                         | 6.92 | 8.52  | 10.07 |
| d4T                  | ddl <sub>q</sub>   | ATV/r              | 0.25                     | 0.84 | 7.44 | 0.90               | 7.44 | 7.44 | 7.44  | 1.09               | 7.69 | 8.28 | 8.53  | 1.45                         | 7.53 | 8.04  | 8.26  |
| AZT <sub>t</sub>     | 3TC <sub>b</sub>   | LPV/r <sub>q</sub> | 0.39                     | 2.30 | 6.64 | 2.30               | 6.64 | 6.64 | 6.64  | 2.70               | 7.03 | 8.94 | 9.34  | 2.95                         | 7.17 | 7.77  | 9.42  |
| d4T                  | TDF                | ATV/r              | 0.25                     | 0.86 | 7.44 | 0.87               | 7.44 | 7.44 | 7.44  | 1.11               | 7.69 | 8.30 | 8.55  | 1.67                         | 7.53 | 7.80  | 8.18  |
| AZT <sub>b</sub>     | 3TC <sub>q</sub>   | LPV/r <sub>q</sub> | 0.37                     | 2.35 | 6.64 | 2.35               | 6.64 | 6.64 | 6.64  | 2.72               | 7.01 | 8.99 | 9.36  | 2.95                         | 7.14 | 7.79  | 9.43  |
| AZT <sub>b</sub>     | ddl <sub>b</sub>   | ATV/r              | 0.37                     | 0.75 | 7.44 | 0.83               | 7.44 | 7.44 | 7.44  | 1.11               | 7.81 | 8.19 | 8.56  | 1.51                         | 7.57 | 7.97  | 8.21  |
| AZT <sub>b</sub>     | RAL                | LPV/r <sub>b</sub> | 0.37                     | 1.69 | 6.97 | 1.69               | 6.97 | 6.97 | 6.97  | 2.05               | 7.34 | 8.66 | 9.03  | 2.08                         | 7.47 | 9.20  | 9.66  |
| ETR                  | RAL                | MVC                | 6.31                     | 1.69 | 1.72 | 6.30               | 6.30 | 1.94 | 6.30  | 7.99               | 8.03 | 3.41 | 9.72  | 7.73                         | 9.41 | 3.94  | 10.97 |
| AZT <sub>t</sub>     | 3TC <sub>q</sub>   | LPV/r <sub>q</sub> | 0.39                     | 2.35 | 6.64 | 2.35               | 6.64 | 6.64 | 6.64  | 2.74               | 7.03 | 8.99 | 9.38  | 2.99                         | 7.17 | 7.79  | 9.46  |
| AZT <sub>t</sub>     | ddl <sub>b</sub>   | ATV/r              | 0.39                     | 0.75 | 7.44 | 0.84               | 7.44 | 7.44 | 7.44  | 1.14               | 7.84 | 8.19 | 8.58  | 1.55                         | 7.58 | 7.97  | 8.23  |
| AZT <sub>t</sub>     | RAL                | LPV/r <sub>b</sub> | 0.39                     | 1.69 | 6.97 | 1.69               | 6.97 | 6.97 | 6.97  | 2.08               | 7.37 | 8.66 | 9.05  | 2.11                         | 7.51 | 9.20  | 9.69  |
| ddl <sub>q</sub>     | ABC <sub>b</sub>   | LPV/r <sub>q</sub> | 0.84                     | 1.91 | 6.64 | 2.06               | 6.64 | 6.64 | 6.64  | 2.75               | 7.48 | 8.55 | 9.39  | 2.20                         | 7.26 | 7.67  | 8.25  |
| TDF                  | ABC <sub>b</sub>   | LPV/r <sub>q</sub> | 0.86                     | 1.91 | 6.64 | 1.92               | 6.64 | 6.64 | 6.64  | 2.77               | 7.50 | 8.55 | 9.41  | 1.89                         | 7.07 | 7.67  | 7.91  |
| ddl <sub>EC</sub>    | TDF                | ETR                | 2.56                     | 0.86 | 6.31 | 2.56               | 6.33 | 6.30 | 6.33  | 3.42               | 8.87 | 7.16 | 9.72  | 2.51                         | 6.24 | 6.44  | 6.48  |
| AZT <sub>b</sub>     | ddl <sub>q</sub>   | ATV/r              | 0.37                     | 0.84 | 7.44 | 0.91               | 7.44 | 7.44 | 7.44  | 1.21               | 7.81 | 8.28 | 8.65  | 1.61                         | 7.57 | 8.04  | 8.28  |
| ETR                  | ENF                | EVG/c              | 6.31                     | 2.07 | 1.41 | 6.31               | 6.30 | 2.20 | 6.31  | 8.38               | 7.72 | 3.48 | 9.79  | 8.20                         | 7.55 | 3.46  | 9.49  |
| ddl <sub>b</sub>     | ENF                | LPV/r <sub>q</sub> | 0.75                     | 2.07 | 6.64 | 2.24               | 6.64 | 6.64 | 6.65  | 2.82               | 7.39 | 8.71 | 9.46  | 2.71                         | 7.20 | 7.88  | 8.59  |
| ddl <sub>b</sub>     | EVG/c              | LPV/r <sub>b</sub> | 0.75                     | 1.41 | 6.97 | 1.60               | 6.98 | 6.97 | 6.98  | 2.16               | 7.72 | 8.39 | 9.13  | 2.25                         | 7.53 | 9.19  | 9.55  |
| d4T                  | ABC <sub>b</sub>   | LPV/r <sub>b</sub> | 0.25                     | 1.91 | 6.97 | 1.92               | 6.97 | 6.97 | 6.97  | 2.16               | 7.22 | 8.89 | 9.14  | 2.42                         | 7.13 | 8.00  | 8.66  |
| d4T                  | ddl <sub>EC</sub>  | LPV/r <sub>q</sub> | 0.25                     | 2.56 | 6.64 | 2.56               | 6.64 | 6.66 | 6.66  | 2.81               | 6.89 | 9.20 | 9.45  | 3.29                         | 6.80 | 8.55  | 9.69  |
| AZT <sub>b</sub>     | TDF                | ATV/r              | 0.37                     | 0.86 | 7.44 | 0.87               | 7.44 | 7.44 | 7.44  | 1.23               | 7.81 | 8.30 | 8.67  | 1.92                         | 7.57 | 7.80  | 8.24  |
| AZT <sub>t</sub>     | ddl <sub>q</sub>   | ATV/r              | 0.39                     | 0.84 | 7.44 | 0.92               | 7.44 | 7.44 | 7.44  | 1.23               | 7.84 | 8.28 | 8.67  | 1.66                         | 7.58 | 8.04  | 8.31  |
| AZT <sub>t</sub>     | TDF                | ATV/r              | 0.39                     | 0.86 | 7.44 | 0.87               | 7.44 | 7.44 | 7.44  | 1.25               | 7.84 | 8.30 | 8.69  | 1.99                         | 7.58 | 7.80  | 8.27  |
| FTC                  | ddl <sub>b</sub>   | ETR                | 2.79                     | 0.75 | 6.31 | 2.85               | 6.31 | 6.31 | 6.31  | 3.54               | 9.10 | 7.05 | 9.84  | 3.06                         | 6.83 | 6.28  | 6.75  |
| FTC                  | EVG/c              | ATV                | 2.79                     | 1.41 | 5.97 | 2.80               | 5.98 | 5.97 | 5.98  | 4.20               | 8.76 | 7.38 | 10.17 | 4.28                         | 7.53 | 8.10  | 10.38 |
| 3TC <sub>b</sub>     | ABC <sub>b</sub>   | ATV                | 2.30                     | 1.91 | 5.97 | 2.47               | 5.97 | 5.97 | 5.97  | 4.22               | 8.27 | 7.88 | 10.18 | 2.82                         | 6.90 | 7.02  | 7.78  |
| ABC <sub>q</sub>     | ENF                | ATV                | 2.14                     | 2.07 | 5.97 | 2.53               | 5.97 | 5.98 | 5.98  | 4.21               | 8.11 | 8.04 | 10.18 | 3.82                         | 7.14 | 7.65  | 8.93  |
| ABC <sub>q</sub>     | ETR                | EVG/c              | 2.14                     | 6.31 | 1.41 | 6.31               | 2.20 | 6.30 | 6.31  | 8.45               | 3.56 | 7.72 | 9.86  | 6.66                         | 3.62 | 7.55  | 8.61  |
| ddl <sub>b</sub>     | ABC <sub>q</sub>   | LPV/r <sub>q</sub> | 0.75                     | 2.14 | 6.64 | 2.24               | 6.64 | 6.64 | 6.64  | 2.89               | 7.39 | 8.78 | 9.53  | 2.38                         | 7.20 | 7.79  | 8.31  |
| ddl <sub>q</sub>     | ENF                | LPV/r <sub>q</sub> | 0.84                     | 2.07 | 6.64 | 2.26               | 6.64 | 6.64 | 6.65  | 2.91               | 7.48 | 8.71 | 9.55  | 2.79                         | 7.26 | 7.88  | 8.66  |
| 3TC <sub>q</sub>     | ABC <sub>b</sub>   | ATV                | 2.35                     | 1.91 | 5.97 | 2.51               | 5.97 | 5.97 | 5.97  | 4.26               | 8.32 | 7.88 | 10.23 | 2.86                         | 6.92 | 7.02  | 7.80  |
| ddl <sub>q</sub>     | EVG/c              | LPV/r <sub>b</sub> | 0.84                     | 1.41 | 6.97 | 1.62               | 6.98 | 6.97 | 6.98  | 2.25               | 7.81 | 8.39 | 9.23  | 2.36                         | 7.60 | 9.19  | 9.66  |

| Regimen <sup>a</sup> |        |        | <i>IIP</i> <sub>ave</sub> |      |      |                    |      |      |       |                    |      |      |       |                       |      |       |       |
|----------------------|--------|--------|---------------------------|------|------|--------------------|------|------|-------|--------------------|------|------|-------|-----------------------|------|-------|-------|
|                      |        |        | Single drug               |      |      | Loewe <sup>b</sup> |      |      |       | Bliss <sup>c</sup> |      |      |       | DI Index <sup>d</sup> |      |       |       |
| Drug 1               | Drug 2 | Drug 3 | 1                         | 2    | 3    | 1,2                | 1,3  | 2,3  | 1,2,3 | 1,2                | 1,3  | 2,3  | 1,2,3 | 1,2                   | 1,3  | 2,3   | 1,2,3 |
| TDF                  | ENF    | LPV/rq | 0.86                      | 2.07 | 6.64 | 2.08               | 6.64 | 6.64 | 6.64  | 2.93               | 7.50 | 8.71 | 9.57  | 2.63                  | 7.07 | 7.88  | 8.30  |
| ABCb                 | ETR    | RAL    | 1.91                      | 6.31 | 1.69 | 6.31               | 2.10 | 6.30 | 6.31  | 8.22               | 3.60 | 7.99 | 9.91  | 6.62                  | 3.45 | 7.73  | 8.47  |
| ddlB                 | ETR    | NFVt   | 0.75                      | 6.31 | 2.76 | 6.31               | 2.92 | 6.40 | 6.41  | 7.05               | 3.50 | 9.06 | 9.81  | 6.28                  | 3.29 | 10.37 | 9.37  |
| TDF                  | EVG/c  | LPV/rb | 0.86                      | 1.41 | 6.97 | 1.43               | 6.97 | 6.97 | 6.97  | 2.27               | 7.83 | 8.39 | 9.25  | 2.25                  | 7.41 | 9.19  | 9.43  |
| AZTb                 | ABCb   | LPV/rb | 0.37                      | 1.91 | 6.97 | 1.91               | 6.97 | 6.97 | 6.97  | 2.28               | 7.34 | 8.89 | 9.26  | 2.84                  | 7.47 | 8.00  | 9.67  |
| AZTb                 | ddIEC  | LPV/rq | 0.37                      | 2.56 | 6.64 | 2.56               | 6.64 | 6.66 | 6.66  | 2.93               | 7.01 | 9.20 | 9.57  | 3.41                  | 7.14 | 8.55  | 10.30 |
| ddIEC                | RAL    | ATV    | 2.56                      | 1.69 | 5.97 | 2.66               | 6.03 | 5.97 | 6.03  | 4.25               | 8.53 | 7.65 | 10.21 | 4.11                  | 7.81 | 8.52  | 10.58 |
| FTC                  | ddlq   | ETR    | 2.79                      | 0.84 | 6.31 | 2.86               | 6.31 | 6.31 | 6.31  | 3.63               | 9.10 | 7.14 | 9.93  | 3.10                  | 6.83 | 6.28  | 6.77  |
| ABCb                 | ETR    | MVC    | 1.91                      | 6.31 | 1.72 | 6.31               | 2.07 | 6.30 | 6.31  | 8.22               | 3.64 | 8.03 | 9.94  | 6.62                  | 4.16 | 9.41  | 10.55 |
| AZTt                 | ABCb   | LPV/rb | 0.39                      | 1.91 | 6.97 | 1.91               | 6.97 | 6.97 | 6.97  | 2.31               | 7.37 | 8.89 | 9.28  | 2.91                  | 7.51 | 8.00  | 9.71  |
| AZTt                 | ddIEC  | LPV/rq | 0.39                      | 2.56 | 6.64 | 2.56               | 6.64 | 6.66 | 6.66  | 2.95               | 7.03 | 9.20 | 9.59  | 3.46                  | 7.17 | 8.55  | 10.34 |
| FTC                  | TDF    | ETR    | 2.79                      | 0.86 | 6.31 | 2.79               | 6.31 | 6.30 | 6.31  | 3.65               | 9.10 | 7.16 | 9.95  | 3.07                  | 6.83 | 6.44  | 7.05  |
| ddlq                 | ABCq   | LPV/rq | 0.84                      | 2.14 | 6.64 | 2.25               | 6.64 | 6.64 | 6.64  | 2.98               | 7.48 | 8.78 | 9.62  | 2.41                  | 7.26 | 7.79  | 8.37  |
| ddlB                 | ETR    | NFVb   | 0.75                      | 6.31 | 2.80 | 6.31               | 2.96 | 6.41 | 6.41  | 7.05               | 3.55 | 9.11 | 9.85  | 6.28                  | 3.33 | 10.43 | 9.42  |
| d4T                  | ENF    | LPV/rb | 0.25                      | 2.07 | 6.97 | 2.07               | 6.97 | 6.98 | 6.98  | 2.32               | 7.22 | 9.04 | 9.29  | 2.34                  | 7.13 | 8.21  | 8.54  |
| TDF                  | ABCq   | LPV/rq | 0.86                      | 2.14 | 6.64 | 2.14               | 6.64 | 6.64 | 6.64  | 3.00               | 7.50 | 8.78 | 9.64  | 2.11                  | 7.07 | 7.79  | 8.00  |
| ddlq                 | ETR    | NFVt   | 0.84                      | 6.31 | 2.76 | 6.31               | 2.93 | 6.40 | 6.41  | 7.14               | 3.60 | 9.06 | 9.90  | 6.28                  | 3.35 | 10.37 | 9.45  |
| ddlB                 | TDF    | EFV    | 0.75                      | 0.86 | 7.35 | 1.06               | 7.35 | 7.35 | 7.35  | 1.61               | 8.10 | 8.21 | 8.96  | 1.03                  | 7.77 | 7.97  | 8.31  |
| d4T                  | FTC    | LPV/rq | 0.25                      | 2.79 | 6.64 | 2.79               | 6.64 | 6.64 | 6.64  | 3.04               | 6.89 | 9.43 | 9.68  | 3.21                  | 6.80 | 8.38  | 9.11  |
| TDF                  | ETR    | NFVt   | 0.86                      | 6.31 | 2.76 | 6.30               | 2.76 | 6.40 | 6.40  | 7.16               | 3.62 | 9.06 | 9.92  | 6.44                  | 3.16 | 10.37 | 9.58  |
| 3TCb                 | ENF    | ATV    | 2.30                      | 2.07 | 5.97 | 2.63               | 5.97 | 5.98 | 5.98  | 4.37               | 8.27 | 8.04 | 10.34 | 4.55                  | 6.90 | 7.65  | 9.18  |
| 3TCb                 | ETR    | EVG/c  | 2.30                      | 6.31 | 1.41 | 6.31               | 2.35 | 6.30 | 6.31  | 8.61               | 3.72 | 7.72 | 10.02 | 6.86                  | 4.06 | 7.55  | 8.99  |
| 3TCb                 | ddlB   | LPV/rq | 2.30                      | 0.75 | 6.64 | 2.39               | 6.64 | 6.64 | 6.64  | 3.05               | 8.94 | 7.39 | 9.69  | 2.55                  | 7.77 | 7.20  | 8.34  |
| d4T                  | ABCq   | LPV/rb | 0.25                      | 2.14 | 6.97 | 2.14               | 6.97 | 6.97 | 6.97  | 2.39               | 7.22 | 9.12 | 9.37  | 2.65                  | 7.13 | 8.13  | 8.88  |
| ddlq                 | ETR    | NFVb   | 0.84                      | 6.31 | 2.80 | 6.31               | 2.98 | 6.41 | 6.42  | 7.14               | 3.64 | 9.11 | 9.94  | 6.28                  | 3.40 | 10.43 | 9.50  |
| 3TCq                 | ENF    | ATV    | 2.35                      | 2.07 | 5.97 | 2.67               | 5.97 | 5.98 | 5.98  | 4.42               | 8.32 | 8.04 | 10.39 | 4.60                  | 6.92 | 7.65  | 9.22  |
| d4T                  | EFV    | EVG/c  | 0.25                      | 7.35 | 1.41 | 7.35               | 1.42 | 7.35 | 7.35  | 7.60               | 1.66 | 8.77 | 9.02  | 8.00                  | 1.69 | 8.86  | 10.25 |
| ETR                  | ENF    | RAL    | 6.31                      | 2.07 | 1.69 | 6.31               | 6.30 | 2.29 | 6.31  | 8.38               | 7.99 | 3.76 | 10.06 | 8.20                  | 7.73 | 3.96  | 9.81  |
| 3TCq                 | ETR    | EVG/c  | 2.35                      | 6.31 | 1.41 | 6.31               | 2.39 | 6.30 | 6.31  | 8.65               | 3.76 | 7.72 | 10.07 | 6.87                  | 4.10 | 7.55  | 9.03  |
| TDF                  | ETR    | NFVb   | 0.86                      | 6.31 | 2.80 | 6.30               | 2.80 | 6.41 | 6.41  | 7.16               | 3.66 | 9.11 | 9.97  | 6.44                  | 3.20 | 10.43 | 9.62  |
| 3TCq                 | ddlB   | LPV/rq | 2.35                      | 0.75 | 6.64 | 2.44               | 6.64 | 6.64 | 6.64  | 3.10               | 8.99 | 7.39 | 9.74  | 2.59                  | 7.79 | 7.20  | 8.36  |
| ddlB                 | RAL    | LPV/rb | 0.75                      | 1.69 | 6.97 | 1.83               | 6.98 | 6.97 | 6.98  | 2.43               | 7.72 | 8.66 | 9.41  | 2.38                  | 7.53 | 9.20  | 9.51  |
| 3TCb                 | ABCq   | ATV    | 2.30                      | 2.14 | 5.97 | 2.56               | 5.97 | 5.97 | 5.97  | 4.45               | 8.27 | 8.11 | 10.41 | 2.93                  | 6.90 | 7.14  | 7.88  |
| AZTb                 | ENF    | LPV/rb | 0.37                      | 2.07 | 6.97 | 2.07               | 6.97 | 6.98 | 6.98  | 2.44               | 7.34 | 9.04 | 9.41  | 2.51                  | 7.47 | 8.21  | 9.40  |
| ddlq                 | TDF    | EFV    | 0.84                      | 0.86 | 7.35 | 1.10               | 7.36 | 7.35 | 7.36  | 1.70               | 8.19 | 8.21 | 9.05  | 1.07                  | 7.82 | 7.97  | 8.36  |
| ETR                  | ENF    | MVC    | 6.31                      | 2.07 | 1.72 | 6.31               | 6.30 | 2.26 | 6.31  | 8.38               | 8.03 | 3.79 | 10.10 | 8.20                  | 9.41 | 4.70  | 11.73 |
| AZTt                 | ENF    | LPV/rb | 0.39                      | 2.07 | 6.97 | 2.07               | 6.97 | 6.98 | 6.98  | 2.46               | 7.37 | 9.04 | 9.44  | 2.54                  | 7.51 | 8.21  | 9.43  |
| EVG/c                | LPV/rq | MVC    | 1.41                      | 6.64 | 1.72 | 6.64               | 1.84 | 6.64 | 6.64  | 8.05               | 3.14 | 8.36 | 9.78  | 8.86                  | 3.20 | 6.64  | 9.54  |
| 3TCb                 | ddlq   | LPV/rq | 2.30                      | 0.84 | 6.64 | 2.41               | 6.64 | 6.64 | 6.64  | 3.14               | 8.94 | 7.48 | 9.78  | 2.58                  | 7.77 | 7.26  | 8.39  |
| FTC                  | RAL    | ATV    | 2.79                      | 1.69 | 5.97 | 2.82               | 5.98 | 5.97 | 5.98  | 4.48               | 8.76 | 7.65 | 10.44 | 4.61                  | 7.53 | 8.52  | 10.76 |
| 3TCq                 | ABCq   | ATV    | 2.35                      | 2.14 | 5.97 | 2.59               | 5.97 | 5.97 | 5.97  | 4.49               | 8.32 | 8.11 | 10.46 | 2.96                  | 6.92 | 7.14  | 7.90  |
| AZTb                 | FTC    | LPV/rq | 0.37                      | 2.79 | 6.64 | 2.79               | 6.64 | 6.64 | 6.64  | 3.16               | 7.01 | 9.43 | 9.80  | 3.55                  | 7.14 | 8.38  | 10.34 |
| ABCq                 | ETR    | RAL    | 2.14                      | 6.31 | 1.69 | 6.31               | 2.26 | 6.30 | 6.31  | 8.45               | 3.83 | 7.99 | 10.14 | 6.66                  | 3.68 | 7.73  | 8.62  |
| 3TCb                 | TDF    | LPV/rq | 2.30                      | 0.86 | 6.64 | 2.30               | 6.64 | 6.64 | 6.64  | 3.16               | 8.94 | 7.50 | 9.80  | 2.97                  | 7.77 | 7.07  | 8.36  |
| AZTb                 | ABCq   | LPV/rb | 0.37                      | 2.14 | 6.97 | 2.14               | 6.97 | 6.97 | 6.97  | 2.51               | 7.34 | 9.12 | 9.48  | 3.07                  | 7.47 | 8.13  | 9.97  |
| AZTt                 | FTC    | LPV/rq | 0.39                      | 2.79 | 6.64 | 2.79               | 6.64 | 6.64 | 6.64  | 3.18               | 7.03 | 9.43 | 9.82  | 3.60                  | 7.17 | 8.38  | 10.38 |
| ddIEC                | ABCb   | ATV    | 2.56                      | 1.91 | 5.97 | 2.74               | 6.03 | 5.97 | 6.03  | 4.47               | 8.53 | 7.88 | 10.44 | 3.11                  | 7.81 | 7.02  | 8.51  |
| 3TCq                 | ddlq   | LPV/rq | 2.35                      | 0.84 | 6.64 | 2.45               | 6.64 | 6.64 | 6.64  | 3.19               | 8.99 | 7.48 | 9.83  | 2.62                  | 7.79 | 7.26  | 8.42  |
| ddlq                 | RAL    | LPV/rb | 0.84                      | 1.69 | 6.97 | 1.85               | 6.98 | 6.97 | 6.98  | 2.53               | 7.81 | 8.66 | 9.50  | 2.47                  | 7.60 | 9.20  | 9.60  |
| ABCq                 | ETR    | MVC    | 2.14                      | 6.31 | 1.72 | 6.31               | 2.23 | 6.30 | 6.31  | 8.45               | 3.87 | 8.03 | 10.17 | 6.66                  | 4.41 | 9.41  | 10.82 |
| ABCq                 | ETR    | MVC    | 2.14                      | 6.31 | 1.72 | 6.31               | 2.23 | 6.30 | 6.31  | 8.45               | 3.87 | 8.03 | 10.17 | 6.66                  | 4.41 | 9.41  | 10.82 |
| AZTt                 | ABCq   | LPV/rb | 0.39                      | 2.14 | 6.97 | 2.14               | 6.97 | 6.97 | 6.97  | 2.54               | 7.37 | 9.12 | 9.51  | 3.13                  | 7.51 | 8.13  | 10.01 |
| 3TCq                 | TDF    | LPV/rq | 2.35                      | 0.86 | 6.64 | 2.35               | 6.64 | 6.64 | 6.64  | 3.21               | 8.99 | 7.50 | 9.85  | 3.02                  | 7.79 | 7.07  | 8.38  |
| AZTb                 | EFV    | EVG/c  | 0.37                      | 7.35 | 1.41 | 7.35               | 1.42 | 7.35 | 7.35  | 7.72               | 1.78 | 8.77 | 9.14  | 8.91                  | 1.83 | 8.86  | 11.83 |
| ddlB                 | TDF    | ATV/r  | 0.75                      | 0.86 | 7.44 | 1.06               | 7.44 | 7.44 | 7.44  | 1.61               | 8.19 | 8.30 | 9.05  | 1.03                  | 7.97 | 7.80  | 8.29  |
| TDF                  | RAL    | LPV/rb | 0.86                      | 1.69 | 6.97 | 1.69               | 6.97 | 6.97 | 6.97  | 2.55               | 7.83 | 8.66 | 9.52  | 2.71                  | 7.41 | 9.20  | 9.49  |
| d4T                  | 3TCb   | LPV/rb | 0.25                      | 2.30 | 6.97 | 2.31               | 6.97 | 6.97 | 6.97  | 2.55               | 7.22 | 9.28 | 9.53  | 2.72                  | 7.13 | 8.10  | 8.83  |
| AZTt                 | EFV    | EVG/c  | 0.39                      | 7.35 | 1.41 | 7.35               | 1.42 | 7.35 | 7.35  | 7.75               | 1.81 | 8.77 | 9.16  | 9.02                  | 1.86 | 8.86  | 11.90 |
| d4T                  | 3TCq   | LPV/rb | 0.25                      | 2.35 | 6.97 | 2.35               | 6.97 | 6.97 | 6.97  | 2.60               | 7.22 | 9.32 | 9.57  | 2.77                  | 7.13 | 8.12  | 8.87  |
| d4T                  | EVG/c  | ATV/r  | 0.25                      | 1.41 | 7.44 | 1.42               | 7.44 | 7.44 | 7.44  | 1.66               | 7.69 | 8.86 | 9.11  | 1.70                  | 7.53 | 9.57  | 9.13  |
| ddlq                 | TDF    | ATV/r  | 0.84                      | 0.86 | 7.44 | 1.10               | 7.44 | 7.44 | 7.44  | 1.70               | 8.28 | 8.30 | 9.14  | 1.07                  | 8.04 | 7.80  | 8.34  |
| ABCb                 | ETR    | ENF    | 1.91                      | 6.31 | 2.07 | 6.31               | 2.41 | 6.31 | 6.31  | 8.22               | 3.98 | 8.38 | 10.29 | 6.62                  | 3.61 | 8.20  | 8.77  |
| 3TCb                 | ETR    | RAL    | 2.30                      | 6.31 | 1.69 | 6.31               | 2.39 | 6.30 | 6.31  | 8.61               | 3.99 | 7.99 | 10.30 | 6.86                  | 4.00 | 7.73  | 8.92  |
| ABCb                 | EVG/c  | LPV/rq | 1.91                      | 1.41 | 6.64 | 2.02               | 6.64 | 6.64 | 6.64  | 3.33               | 8.55 | 8.05 | 9.97  | 3.39                  | 7.67 | 8.86  | 10.24 |
| ddlB                 | ABCb   | LPV/rb | 0.75                      | 1.91 | 6.97 | 2.04               | 6.98 | 6.97 | 6.98  | 2.66               | 7.72 | 8.89 | 9.63  | 2.17                  | 7.53 | 8.00  | 8.53  |
| ddIEC                | ETR    | EVG/c  | 2.56                      | 6.31 | 1.41 | 6.33               | 2.60 | 6.30 | 6.33  | 8.87               | 3.97 | 7.72 | 10.28 | 6.24                  | 4.20 | 7.55  | 8.82  |
| AZTb                 | 3TCb   | LPV/rb | 0.37                      | 2.30 | 6.97 | 2.30               | 6.97 | 6.97 | 6.97  | 2.67               | 7.34 | 9.28 | 9.65  | 2.91                  | 7.47 | 8.10  | 9.71  |
| ddIEC                | ENF    | ATV    | 2.56                      | 2.07 | 5.97 | 2.94               | 6.03 | 5.98 | 6.04  | 4.63               | 8.53 | 8.04 | 10.60 | 4.33                  | 7.81 | 7.65  | 9.57  |
| 3TCb                 | ETR    | MVC    | 2.30                      | 6.31 | 1.72 | 6.31               | 2.36 | 6.30 | 6.31  | 8.61               | 4.03 | 8.03 | 10.33 | 6.86                  | 5.28 | 9.41  | 11.51 |
| d4T                  | EFV    | RAL    | 0.25                      | 7.35 | 1.69 | 7.35               | 1.69 | 7.35 | 7.35  | 7.60               | 1.94 | 9.04 | 9.29  | 8.00                  | 2.00 | 9.55  | 10.91 |



| Regimen <sup>a</sup> |        |        | <i>HIP</i> <sub>ave</sub> |      |      |                    |      |      |       |                    |      |       |       |                              |       |       |       |
|----------------------|--------|--------|---------------------------|------|------|--------------------|------|------|-------|--------------------|------|-------|-------|------------------------------|-------|-------|-------|
|                      |        |        | Single drug               |      |      | Loewe <sup>b</sup> |      |      |       | Bliss <sup>c</sup> |      |       |       | <i>DI</i> Index <sup>d</sup> |       |       |       |
| Drug 1               | Drug 2 | Drug 3 | 1                         | 2    | 3    | 1,2                | 1,3  | 2,3  | 1,2,3 | 1,2                | 1,3  | 2,3   | 1,2,3 | 1,2                          | 1,3   | 2,3   | 1,2,3 |
| AZTt                 | 3TCb   | LPV/rb | 0.39                      | 2.30 | 6.97 | 2.30               | 6.97 | 6.97 | 6.97  | 2.70               | 7.37 | 9.28  | 9.67  | 2.95                         | 7.51  | 8.10  | 9.74  |
| 3TCq                 | ETR    | RAL    | 2.35                      | 6.31 | 1.69 | 6.31               | 2.44 | 6.30 | 6.31  | 8.65               | 4.04 | 7.99  | 10.34 | 6.87                         | 4.04  | 7.73  | 8.95  |
| FTC                  | ABCb   | ATV    | 2.79                      | 1.91 | 5.97 | 2.86               | 5.98 | 5.97 | 5.98  | 4.70               | 8.76 | 7.88  | 10.67 | 2.92                         | 7.53  | 7.02  | 8.17  |
| AZTb                 | 3TCq   | LPV/rb | 0.37                      | 2.35 | 6.97 | 2.35               | 6.97 | 6.97 | 6.97  | 2.72               | 7.34 | 9.32  | 9.69  | 2.95                         | 7.47  | 8.12  | 9.76  |
| AZTb                 | EVG/c  | ATV/r  | 0.37                      | 1.41 | 7.44 | 1.42               | 7.44 | 7.44 | 7.44  | 1.78               | 7.81 | 8.86  | 9.22  | 1.84                         | 7.57  | 9.57  | 9.24  |
| d4T                  | EFV    | MVC    | 0.25                      | 7.35 | 1.72 | 7.35               | 1.73 | 7.35 | 7.35  | 7.60               | 1.97 | 9.08  | 9.33  | 8.00                         | 1.95  | 10.23 | 11.24 |
| 3TCq                 | ETR    | MVC    | 2.35                      | 6.31 | 1.72 | 6.31               | 2.41 | 6.30 | 6.31  | 8.65               | 4.07 | 8.03  | 10.38 | 6.87                         | 5.32  | 9.41  | 11.57 |
| AZTt                 | 3TCq   | LPV/rb | 0.39                      | 2.35 | 6.97 | 2.35               | 6.97 | 6.97 | 6.97  | 2.74               | 7.37 | 9.32  | 9.72  | 2.99                         | 7.51  | 8.12  | 9.79  |
| RAL                  | LPV/rq | MVC    | 1.69                      | 6.64 | 1.72 | 6.64               | 1.94 | 6.64 | 6.64  | 8.33               | 3.41 | 8.36  | 10.05 | 8.86                         | 3.94  | 6.64  | 9.63  |
| AZTt                 | EVG/c  | ATV/r  | 0.39                      | 1.41 | 7.44 | 1.42               | 7.44 | 7.44 | 7.44  | 1.81               | 7.84 | 8.86  | 9.25  | 1.87                         | 7.58  | 9.57  | 9.26  |
| ddIEC                | ABCq   | ATV    | 2.56                      | 2.14 | 5.97 | 2.82               | 6.03 | 5.97 | 6.03  | 4.70               | 8.53 | 8.11  | 10.67 | 3.21                         | 7.81  | 7.14  | 8.63  |
| ddIq                 | ABCb   | LPV/rb | 0.84                      | 1.91 | 6.97 | 2.06               | 6.98 | 6.97 | 6.98  | 2.75               | 7.81 | 8.89  | 9.73  | 2.20                         | 7.60  | 8.00  | 8.59  |
| TDF                  | ABCb   | LPV/rb | 0.86                      | 1.91 | 6.97 | 1.92               | 6.97 | 6.97 | 6.97  | 2.77               | 7.83 | 8.89  | 9.75  | 1.89                         | 7.41  | 8.00  | 8.25  |
| ddIEC                | TDF    | LPV/rq | 2.56                      | 0.86 | 6.64 | 2.56               | 6.66 | 6.64 | 6.66  | 3.42               | 9.20 | 7.50  | 10.06 | 2.51                         | 8.55  | 7.07  | 8.50  |
| AZTb                 | EFV    | RAL    | 0.37                      | 7.35 | 1.69 | 7.35               | 1.69 | 7.35 | 7.35  | 7.72               | 2.05 | 9.04  | 9.41  | 8.91                         | 2.07  | 9.55  | 12.59 |
| ddIb                 | ENF    | LPV/rb | 0.75                      | 2.07 | 6.97 | 2.24               | 6.98 | 6.98 | 6.98  | 2.82               | 7.72 | 9.04  | 9.79  | 2.71                         | 7.53  | 8.21  | 8.92  |
| ENF                  | EVG/c  | LPV/rq | 2.07                      | 1.41 | 6.64 | 2.20               | 6.64 | 6.64 | 6.64  | 3.48               | 8.71 | 8.05  | 10.12 | 3.46                         | 7.88  | 8.86  | 10.44 |
| d4T                  | ddIEC  | LPV/rb | 0.25                      | 2.56 | 6.97 | 2.56               | 6.97 | 6.99 | 6.99  | 2.81               | 7.22 | 9.53  | 9.78  | 3.29                         | 7.13  | 8.88  | 9.99  |
| AZTt                 | EFV    | RAL    | 0.39                      | 7.35 | 1.69 | 7.35               | 1.69 | 7.35 | 7.35  | 7.75               | 2.08 | 9.04  | 9.43  | 9.02                         | 2.10  | 9.55  | 12.67 |
| AZTb                 | EFV    | MVC    | 0.37                      | 7.35 | 1.72 | 7.35               | 1.72 | 7.35 | 7.35  | 7.72               | 2.09 | 9.08  | 9.44  | 8.91                         | 2.06  | 10.23 | 12.95 |
| AZTb                 | EFV    | MVC    | 0.37                      | 7.35 | 1.72 | 7.35               | 1.72 | 7.35 | 7.35  | 7.72               | 2.09 | 9.08  | 9.44  | 8.91                         | 2.06  | 10.23 | 12.95 |
| FTC                  | ETR    | EVG/c  | 2.79                      | 6.31 | 1.41 | 6.31               | 2.80 | 6.30 | 6.31  | 9.10               | 4.20 | 7.72  | 10.51 | 6.83                         | 4.28  | 7.55  | 9.11  |
| FTC                  | ddIb   | LPV/rq | 2.79                      | 0.75 | 6.64 | 2.85               | 6.64 | 6.64 | 6.65  | 3.54               | 9.43 | 7.39  | 10.18 | 3.06                         | 8.38  | 7.20  | 8.83  |
| FTC                  | ENF    | ATV    | 2.79                      | 2.07 | 5.97 | 2.99               | 5.98 | 5.98 | 5.99  | 4.86               | 8.76 | 8.04  | 10.83 | 4.39                         | 7.53  | 7.65  | 9.38  |
| d4T                  | RAL    | ATV/r  | 0.25                      | 1.69 | 7.44 | 1.69               | 7.44 | 7.44 | 7.44  | 1.94               | 7.69 | 9.13  | 9.38  | 2.01                         | 7.53  | 10.00 | 9.47  |
| AZTt                 | EFV    | MVC    | 0.39                      | 7.35 | 1.72 | 7.35               | 1.72 | 7.35 | 7.35  | 7.75               | 2.12 | 9.08  | 9.47  | 9.02                         | 2.09  | 10.23 | 13.02 |
| ABCq                 | ETR    | ENF    | 2.14                      | 6.31 | 2.07 | 6.31               | 2.53 | 6.31 | 6.31  | 8.45               | 4.21 | 8.38  | 10.52 | 6.66                         | 3.82  | 8.20  | 8.91  |
| 3TCb                 | ABCb   | ETR    | 2.30                      | 1.91 | 6.31 | 2.47               | 6.31 | 6.31 | 6.31  | 4.22               | 8.61 | 8.22  | 10.52 | 2.82                         | 6.86  | 6.62  | 7.16  |
| ABCq                 | EVG/c  | LPV/rq | 2.14                      | 1.41 | 6.64 | 2.20               | 6.64 | 6.64 | 6.64  | 3.56               | 8.78 | 8.05  | 10.20 | 3.62                         | 7.79  | 8.86  | 10.48 |
| ddIb                 | ABCq   | LPV/rb | 0.75                      | 2.14 | 6.97 | 2.24               | 6.98 | 6.97 | 6.98  | 2.89               | 7.72 | 9.12  | 9.86  | 2.38                         | 7.53  | 8.13  | 8.65  |
| ddIq                 | ENF    | LPV/rb | 0.84                      | 2.07 | 6.97 | 2.26               | 6.98 | 6.98 | 6.98  | 2.91               | 7.81 | 9.04  | 9.88  | 2.79                         | 7.60  | 8.21  | 8.99  |
| 3TCb                 | ddIEC  | ATV    | 2.30                      | 2.56 | 5.97 | 2.91               | 5.97 | 6.03 | 6.03  | 4.86               | 8.27 | 8.53  | 10.83 | 3.38                         | 6.90  | 7.81  | 8.46  |
| ddIb                 | EFV    | EVG/c  | 0.75                      | 7.35 | 1.41 | 7.35               | 1.60 | 7.35 | 7.35  | 8.10               | 2.16 | 8.77  | 9.51  | 7.77                         | 2.25  | 8.86  | 9.23  |
| d4T                  | ABCb   | EFV    | 0.25                      | 1.91 | 7.35 | 1.92               | 7.35 | 7.35 | 7.35  | 2.16               | 7.60 | 9.27  | 9.52  | 2.42                         | 8.00  | 8.81  | 11.01 |
| 3TCq                 | ABCb   | ETR    | 2.35                      | 1.91 | 6.31 | 2.51               | 6.31 | 6.31 | 6.31  | 4.26               | 8.65 | 8.22  | 10.57 | 2.86                         | 6.87  | 6.62  | 7.17  |
| TDF                  | ENF    | LPV/rb | 0.86                      | 2.07 | 6.97 | 2.08               | 6.97 | 6.98 | 6.98  | 2.93               | 7.83 | 9.04  | 9.90  | 2.63                         | 7.41  | 8.21  | 8.64  |
| ETR                  | EVG/c  | NFVt   | 6.31                      | 1.41 | 2.76 | 6.30               | 6.40 | 2.82 | 6.40  | 7.72               | 9.06 | 4.17  | 10.48 | 7.55                         | 10.37 | 4.61  | 11.51 |
| ABCb                 | RAL    | LPV/rq | 1.91                      | 1.69 | 6.64 | 2.10               | 6.64 | 6.64 | 6.64  | 3.60               | 8.55 | 8.33  | 10.24 | 3.45                         | 7.67  | 8.86  | 10.05 |
| FTC                  | ABCq   | ATV    | 2.79                      | 2.14 | 5.97 | 2.90               | 5.98 | 5.97 | 5.98  | 4.93               | 8.76 | 8.11  | 10.90 | 2.97                         | 7.53  | 7.14  | 8.27  |
| ddIEC                | ETR    | RAL    | 2.56                      | 6.31 | 1.69 | 6.33               | 2.66 | 6.30 | 6.33  | 8.87               | 4.25 | 7.99  | 10.55 | 6.24                         | 4.11  | 7.73  | 8.68  |
| AZTb                 | ddIEC  | LPV/rb | 0.37                      | 2.56 | 6.97 | 2.56               | 6.97 | 6.99 | 6.99  | 2.93               | 7.34 | 9.53  | 9.90  | 3.41                         | 7.47  | 8.88  | 10.62 |
| 3TCq                 | ddIEC  | ATV    | 2.35                      | 2.56 | 5.97 | 2.92               | 5.97 | 6.03 | 6.03  | 4.91               | 8.32 | 8.53  | 10.88 | 3.40                         | 6.92  | 7.81  | 8.48  |
| FTC                  | ddIq   | LPV/rq | 2.79                      | 0.84 | 6.64 | 2.86               | 6.64 | 6.64 | 6.65  | 3.63               | 9.43 | 7.48  | 10.27 | 3.10                         | 8.38  | 7.26  | 8.89  |
| AZTt                 | ddIEC  | LPV/rb | 0.39                      | 2.56 | 6.97 | 2.56               | 6.97 | 6.99 | 6.99  | 2.95               | 7.37 | 9.53  | 9.93  | 3.46                         | 7.51  | 8.88  | 10.66 |
| ABCb                 | LPV/rq | MVC    | 1.91                      | 6.64 | 1.72 | 6.64               | 2.07 | 6.64 | 6.64  | 8.55               | 3.64 | 8.36  | 10.28 | 7.67                         | 4.16  | 6.64  | 8.55  |
| ddIEC                | ETR    | MVC    | 2.56                      | 6.31 | 1.72 | 6.33               | 2.62 | 6.30 | 6.33  | 8.87               | 4.28 | 8.03  | 10.59 | 6.24                         | 4.48  | 9.41  | 10.93 |
| ddIq                 | ABCq   | LPV/rb | 0.84                      | 2.14 | 6.97 | 2.25               | 6.98 | 6.97 | 6.98  | 2.98               | 7.81 | 9.12  | 9.95  | 2.41                         | 7.60  | 8.13  | 8.71  |
| FTC                  | TDF    | LPV/rq | 2.79                      | 0.86 | 6.64 | 2.79               | 6.64 | 6.64 | 6.64  | 3.65               | 9.43 | 7.50  | 10.29 | 3.07                         | 8.38  | 7.07  | 8.57  |
| ETR                  | EVG/c  | NFVb   | 6.31                      | 1.41 | 2.80 | 6.30               | 6.41 | 2.88 | 6.41  | 7.72               | 9.11 | 4.22  | 10.52 | 7.55                         | 10.43 | 4.65  | 11.57 |
| AZTb                 | RAL    | ATV/r  | 0.37                      | 1.69 | 7.44 | 1.69               | 7.44 | 7.44 | 7.44  | 2.05               | 7.81 | 9.13  | 9.50  | 2.08                         | 7.57  | 10.00 | 9.53  |
| TDF                  | ABCq   | LPV/rb | 0.86                      | 2.14 | 6.97 | 2.14               | 6.97 | 6.97 | 6.97  | 3.00               | 7.83 | 9.12  | 9.98  | 2.11                         | 7.41  | 8.13  | 8.34  |
| d4T                  | NVP    | ATV    | 0.25                      | 4.43 | 5.97 | 4.43               | 5.97 | 6.31 | 6.31  | 4.68               | 6.22 | 10.40 | 10.65 | 4.90                         | 6.06  | 8.91  | 10.02 |
| ddIq                 | EFV    | EVG/c  | 0.84                      | 7.35 | 1.41 | 7.36               | 1.62 | 7.35 | 7.36  | 8.19               | 2.25 | 8.77  | 9.61  | 7.82                         | 2.36  | 8.86  | 9.31  |
| AZTt                 | RAL    | ATV/r  | 0.39                      | 1.69 | 7.44 | 1.69               | 7.44 | 7.44 | 7.44  | 2.08               | 7.84 | 9.13  | 9.52  | 2.11                         | 7.58  | 10.00 | 9.56  |
| TDF                  | EFV    | EVG/c  | 0.86                      | 7.35 | 1.41 | 7.35               | 1.43 | 7.35 | 7.35  | 8.21               | 2.27 | 8.77  | 9.63  | 7.97                         | 2.24  | 8.86  | 9.42  |
| d4T                  | FTC    | LPV/rb | 0.25                      | 2.79 | 6.97 | 2.79               | 6.97 | 6.97 | 6.97  | 3.04               | 7.22 | 9.76  | 10.01 | 3.21                         | 7.13  | 8.72  | 9.42  |
| AZTb                 | ABCb   | EFV    | 0.37                      | 1.91 | 7.35 | 1.91               | 7.35 | 7.35 | 7.35  | 2.28               | 7.72 | 9.27  | 9.64  | 2.84                         | 8.91  | 8.81  | 13.08 |
| 3TCb                 | ETR    | ENF    | 2.30                      | 6.31 | 2.07 | 6.31               | 2.63 | 6.31 | 6.31  | 8.61               | 4.37 | 8.38  | 10.68 | 6.86                         | 4.55  | 8.20  | 9.47  |
| 3TCb                 | ddIb   | LPV/rb | 2.30                      | 0.75 | 6.97 | 2.39               | 6.97 | 6.98 | 6.98  | 3.05               | 9.28 | 7.72  | 10.02 | 2.55                         | 8.10  | 7.53  | 8.68  |
| 3TCb                 | EVG/c  | LPV/rq | 2.30                      | 1.41 | 6.64 | 2.35               | 6.64 | 6.64 | 6.64  | 3.72               | 8.94 | 8.05  | 10.36 | 4.06                         | 7.77  | 8.86  | 10.73 |
| AZTt                 | ABCb   | EFV    | 0.39                      | 1.91 | 7.35 | 1.91               | 7.35 | 7.35 | 7.35  | 2.31               | 7.75 | 9.27  | 9.66  | 2.91                         | 9.02  | 8.81  | 13.16 |
| d4T                  | EFV    | ENF    | 0.25                      | 7.35 | 2.07 | 7.35               | 2.07 | 7.35 | 7.35  | 7.60               | 2.32 | 9.42  | 9.67  | 8.00                         | 2.33  | 9.20  | 11.10 |
| 3TCq                 | ETR    | ENF    | 2.35                      | 6.31 | 2.07 | 6.31               | 2.67 | 6.31 | 6.31  | 8.65               | 4.42 | 8.38  | 10.73 | 6.87                         | 4.60  | 8.20  | 9.51  |
| ENF                  | RAL    | LPV/rq | 2.07                      | 1.69 | 6.64 | 2.29               | 6.64 | 6.64 | 6.64  | 3.76               | 8.71 | 8.33  | 10.40 | 3.96                         | 7.88  | 8.86  | 10.44 |
| 3TCq                 | EVG/c  | LPV/rq | 2.35                      | 1.41 | 6.64 | 2.39               | 6.64 | 6.64 | 6.64  | 3.76               | 8.99 | 8.05  | 10.40 | 4.10                         | 7.79  | 8.86  | 10.78 |
| 3TCq                 | ddIb   | LPV/rb | 2.35                      | 0.75 | 6.97 | 2.44               | 6.97 | 6.98 | 6.98  | 3.10               | 9.32 | 7.72  | 10.07 | 2.59                         | 8.12  | 7.53  | 8.70  |
| ddIb                 | EVG/c  | ATV/r  | 0.75                      | 1.41 | 7.44 | 1.60               | 7.44 | 7.44 | 7.44  | 2.16               | 8.19 | 8.86  | 9.60  | 2.25                         | 7.97  | 9.57  | 9.92  |
| d4T                  | ABCb   | ATV/r  | 0.25                      | 1.91 | 7.44 | 1.92               | 7.44 | 7.44 | 7.44  | 2.16               | 7.69 | 9.36  | 9.61  | 2.42                         | 7.53  | 8.49  | 8.88  |
| 3TCb                 | ABCq   | ETR    | 2.30                      | 2.14 | 6.31 | 2.56               | 6.31 | 6.31 | 6.31  | 4.45               | 8.61 | 8.45  | 10.75 | 2.93                         | 6.86  | 6.66  | 7.20  |
| ENF                  | LPV/rq | MVC    | 2.07                      | 6.64 | 1.72 | 6.64               | 2.26 | 6.64 | 6.64  | 8.71               | 3.79 | 8.36  | 10.43 | 7.88                         | 4.70  | 6.64  | 9.06  |

| Regimen <sup>a</sup> |        |        | HIV <sup>ave</sup> |      |      |                    |      |      |       |                    |      |       |       |                       |       |       |       |
|----------------------|--------|--------|--------------------|------|------|--------------------|------|------|-------|--------------------|------|-------|-------|-----------------------|-------|-------|-------|
|                      |        |        | Single drug        |      |      | Loewe <sup>b</sup> |      |      |       | Bliss <sup>c</sup> |      |       |       | DI Index <sup>d</sup> |       |       |       |
| Drug 1               | Drug 2 | Drug 3 | 1                  | 2    | 3    | 1,2                | 1,3  | 2,3  | 1,2,3 | 1,2                | 1,3  | 2,3   | 1,2,3 | 1,2                   | 1,3   | 2,3   | 1,2,3 |
| AZTb                 | NVP    | ATV    | 0.37               | 4.43 | 5.97 | 4.43               | 5.97 | 6.31 | 6.31  | 4.80               | 6.33 | 10.40 | 10.77 | 5.28                  | 6.09  | 8.91  | 10.68 |
| FTC                  | ETR    | RAL    | 2.79               | 6.31 | 1.69 | 6.31               | 2.82 | 6.30 | 6.31  | 9.10               | 4.48 | 7.99  | 10.78 | 6.83                  | 4.61  | 7.73  | 9.29  |
| 3TCb                 | ddIq   | LPV/rb | 2.30               | 0.84 | 6.97 | 2.41               | 6.97 | 6.98 | 6.98  | 3.14               | 9.28 | 7.81  | 10.12 | 2.58                  | 8.10  | 7.60  | 8.73  |
| d4T                  | ABCq   | EFV    | 0.25               | 2.14 | 7.35 | 2.14               | 7.35 | 7.35 | 7.35  | 2.39               | 7.60 | 9.50  | 9.75  | 2.65                  | 8.00  | 8.98  | 11.38 |
| 3TCq                 | ABCq   | ETR    | 2.35               | 2.14 | 6.31 | 2.59               | 6.31 | 6.31 | 6.31  | 4.49               | 8.65 | 8.45  | 10.80 | 2.96                  | 6.87  | 6.66  | 7.21  |
| AZTt                 | NVP    | ATV    | 0.39               | 4.43 | 5.97 | 4.43               | 5.97 | 6.31 | 6.31  | 4.83               | 6.36 | 10.40 | 10.79 | 5.33                  | 6.10  | 8.91  | 10.72 |
| AZTb                 | FTC    | LPV/rb | 0.37               | 2.79 | 6.97 | 2.79               | 6.97 | 6.97 | 6.97  | 3.16               | 7.34 | 9.76  | 10.13 | 3.55                  | 7.47  | 8.72  | 10.65 |
| ABCq                 | RAL    | LPV/rq | 2.14               | 1.69 | 6.64 | 2.26               | 6.64 | 6.64 | 6.64  | 3.83               | 8.78 | 8.33  | 10.47 | 3.68                  | 7.79  | 8.86  | 10.26 |
| 3TCb                 | TDF    | LPV/rb | 2.30               | 0.86 | 6.97 | 2.30               | 6.97 | 6.97 | 6.97  | 3.16               | 9.28 | 7.83  | 10.14 | 2.97                  | 8.10  | 7.41  | 8.69  |
| ddIEC                | ABCb   | ETR    | 2.56               | 1.91 | 6.31 | 2.74               | 6.33 | 6.31 | 6.33  | 4.47               | 8.87 | 8.22  | 10.78 | 3.11                  | 6.24  | 6.62  | 6.76  |
| FTC                  | ETR    | MVC    | 2.79               | 6.31 | 1.72 | 6.31               | 2.80 | 6.30 | 6.31  | 9.10               | 4.51 | 8.03  | 10.82 | 6.83                  | 4.79  | 9.41  | 11.41 |
| AZTt                 | FTC    | LPV/rb | 0.39               | 2.79 | 6.97 | 2.79               | 6.97 | 6.97 | 6.97  | 3.18               | 7.37 | 9.76  | 10.16 | 3.60                  | 7.51  | 8.72  | 10.69 |
| 3TCq                 | ddIq   | LPV/rb | 2.35               | 0.84 | 6.97 | 2.45               | 6.97 | 6.98 | 6.98  | 3.19               | 9.32 | 7.81  | 10.16 | 2.62                  | 8.12  | 7.60  | 8.76  |
| ddIq                 | EVG/c  | ATV/r  | 0.84               | 1.41 | 7.44 | 1.62               | 7.44 | 7.44 | 7.44  | 2.25               | 8.28 | 8.86  | 9.70  | 2.36                  | 8.04  | 9.57  | 10.02 |
| ddIb                 | EFV    | RAL    | 0.75               | 7.35 | 1.69 | 7.35               | 1.83 | 7.35 | 7.35  | 8.10               | 2.43 | 9.04  | 9.79  | 7.77                  | 2.38  | 9.55  | 9.69  |
| ABCq                 | LPV/rq | MVC    | 2.14               | 6.64 | 1.72 | 6.64               | 2.23 | 6.64 | 6.64  | 8.78               | 3.87 | 8.36  | 10.51 | 7.79                  | 4.41  | 6.64  | 8.71  |
| AZTb                 | EFV    | ENF    | 0.37               | 7.35 | 2.07 | 7.35               | 2.07 | 7.35 | 7.35  | 7.72               | 2.44 | 9.42  | 9.79  | 8.91                  | 2.51  | 9.20  | 13.12 |
| ETR                  | RAL    | NFVt   | 6.31               | 1.69 | 2.76 | 6.30               | 6.40 | 2.87 | 6.40  | 7.99               | 9.06 | 4.44  | 10.75 | 7.73                  | 10.37 | 5.85  | 12.41 |
| 3TCq                 | TDF    | LPV/rb | 2.35               | 0.86 | 6.97 | 2.35               | 6.97 | 6.97 | 6.97  | 3.21               | 9.32 | 7.83  | 10.18 | 3.02                  | 8.12  | 7.41  | 8.71  |
| TDF                  | EVG/c  | ATV/r  | 0.86               | 1.41 | 7.44 | 1.43               | 7.44 | 7.44 | 7.44  | 2.27               | 8.30 | 8.86  | 9.72  | 2.25                  | 7.80  | 9.57  | 9.74  |
| AZTb                 | ABCb   | ATV/r  | 0.37               | 1.91 | 7.44 | 1.91               | 7.44 | 7.44 | 7.44  | 2.28               | 7.81 | 9.36  | 9.72  | 2.84                  | 7.57  | 8.49  | 9.19  |
| AZTt                 | EFV    | ENF    | 0.39               | 7.35 | 2.07 | 7.35               | 2.07 | 7.35 | 7.35  | 7.75               | 2.46 | 9.42  | 9.82  | 9.02                  | 2.54  | 9.20  | 13.20 |
| ddIb                 | EFV    | MVC    | 0.75               | 7.35 | 1.72 | 7.35               | 1.83 | 7.35 | 7.35  | 8.10               | 2.47 | 9.08  | 9.82  | 7.77                  | 2.54  | 10.23 | 10.26 |
| ddIb                 | EFV    | MVC    | 0.75               | 7.35 | 1.72 | 7.35               | 1.83 | 7.35 | 7.35  | 8.10               | 2.47 | 9.08  | 9.82  | 7.77                  | 2.54  | 10.23 | 10.26 |
| AZTt                 | ABCb   | ATV/r  | 0.39               | 1.91 | 7.44 | 1.91               | 7.44 | 7.44 | 7.44  | 2.31               | 7.84 | 9.36  | 9.75  | 2.91                  | 7.58  | 8.49  | 9.22  |
| d4T                  | ENF    | ATV/r  | 0.25               | 2.07 | 7.44 | 2.07               | 7.44 | 7.44 | 7.44  | 2.32               | 7.69 | 9.51  | 9.76  | 2.34                  | 7.53  | 9.12  | 8.99  |
| ETR                  | RAL    | NFVb   | 6.31               | 1.69 | 2.80 | 6.30               | 6.41 | 2.93 | 6.41  | 7.99               | 9.11 | 4.49  | 10.79 | 7.73                  | 10.43 | 5.88  | 12.48 |
| AZTb                 | ABCq   | EFV    | 0.37               | 2.14 | 7.35 | 2.14               | 7.35 | 7.35 | 7.35  | 2.51               | 7.72 | 9.50  | 9.86  | 3.07                  | 8.91  | 8.98  | 13.61 |
| ddIq                 | EFV    | RAL    | 0.84               | 7.35 | 1.69 | 7.36               | 1.85 | 7.35 | 7.36  | 8.19               | 2.53 | 9.04  | 9.88  | 7.82                  | 2.47  | 9.55  | 9.78  |
| AZTt                 | ABCq   | EFV    | 0.39               | 2.14 | 7.35 | 2.14               | 7.35 | 7.35 | 7.35  | 2.54               | 7.75 | 9.50  | 9.89  | 3.13                  | 9.02  | 8.98  | 13.70 |
| TDF                  | EFV    | RAL    | 0.86               | 7.35 | 1.69 | 7.35               | 1.69 | 7.35 | 7.35  | 8.21               | 2.55 | 9.04  | 9.90  | 7.97                  | 2.71  | 9.55  | 10.04 |
| d4T                  | 3TCb   | EFV    | 0.25               | 2.30 | 7.35 | 2.31               | 7.35 | 7.35 | 7.35  | 2.55               | 7.60 | 9.66  | 9.91  | 2.72                  | 8.00  | 8.38  | 11.26 |
| ABCb                 | ENF    | LPV/rq | 1.91               | 2.07 | 6.64 | 2.41               | 6.64 | 6.64 | 6.64  | 3.98               | 8.55 | 8.71  | 10.62 | 3.62                  | 7.67  | 7.88  | 9.06  |
| ddIq                 | EFV    | MVC    | 0.84               | 7.35 | 1.72 | 7.36               | 1.85 | 7.35 | 7.36  | 8.19               | 2.56 | 9.08  | 9.91  | 7.82                  | 2.64  | 10.23 | 10.37 |
| 3TCb                 | RAL    | LPV/rq | 2.30               | 1.69 | 6.64 | 2.39               | 6.64 | 6.64 | 6.64  | 3.99               | 8.94 | 8.33  | 10.63 | 4.00                  | 7.77  | 8.86  | 10.41 |
| ddIEC                | ETR    | ENF    | 2.56               | 6.31 | 2.07 | 6.33               | 2.94 | 6.31 | 6.34  | 8.87               | 4.63 | 8.38  | 10.94 | 6.24                  | 4.33  | 8.20  | 9.00  |
| ABCb                 | EVG/c  | LPV/rb | 1.91               | 1.41 | 6.97 | 2.02               | 6.97 | 6.97 | 6.97  | 3.33               | 8.89 | 8.39  | 10.30 | 3.39                  | 8.00  | 9.19  | 10.58 |
| ddIEC                | EVG/c  | LPV/rq | 2.56               | 1.41 | 6.64 | 2.60               | 6.66 | 6.64 | 6.66  | 3.97               | 9.20 | 8.05  | 10.61 | 4.20                  | 8.55  | 8.86  | 11.26 |
| d4T                  | ABCq   | ATV/r  | 0.25               | 2.14 | 7.44 | 2.14               | 7.44 | 7.44 | 7.44  | 2.39               | 7.69 | 9.59  | 9.83  | 2.65                  | 7.53  | 8.62  | 9.07  |
| TDF                  | EFV    | MVC    | 0.86               | 7.35 | 1.72 | 7.35               | 1.73 | 7.35 | 7.35  | 8.21               | 2.58 | 9.08  | 9.94  | 7.97                  | 2.95  | 10.23 | 10.65 |
| d4T                  | 3TCq   | EFV    | 0.25               | 2.35 | 7.35 | 2.35               | 7.35 | 7.35 | 7.35  | 2.60               | 7.60 | 9.70  | 9.95  | 2.77                  | 8.00  | 8.40  | 11.32 |
| 3TCb                 | LPV/rq | MVC    | 2.30               | 6.64 | 1.72 | 6.64               | 2.36 | 6.64 | 6.64  | 8.94               | 4.03 | 8.36  | 10.67 | 7.77                  | 5.28  | 6.64  | 9.32  |
| FTC                  | ABCb   | ETR    | 2.79               | 1.91 | 6.31 | 2.86               | 6.31 | 6.31 | 6.31  | 4.70               | 9.10 | 8.22  | 11.01 | 2.92                  | 6.83  | 6.62  | 7.02  |
| 3TCq                 | RAL    | LPV/rq | 2.35               | 1.69 | 6.64 | 2.44               | 6.64 | 6.64 | 6.64  | 4.04               | 8.99 | 8.33  | 10.68 | 4.04                  | 7.79  | 8.86  | 10.46 |
| ddIb                 | RAL    | ATV/r  | 0.75               | 1.69 | 7.44 | 1.83               | 7.44 | 7.44 | 7.44  | 2.43               | 8.19 | 9.13  | 9.88  | 2.38                  | 7.97  | 10.00 | 10.19 |
| AZTb                 | ENF    | ATV/r  | 0.37               | 2.07 | 7.44 | 2.07               | 7.44 | 7.44 | 7.44  | 2.44               | 7.81 | 9.51  | 9.88  | 2.51                  | 7.57  | 9.12  | 9.10  |
| ddIEC                | ABCq   | ETR    | 2.56               | 2.14 | 6.31 | 2.82               | 6.33 | 6.31 | 6.33  | 4.70               | 8.87 | 8.45  | 11.01 | 3.21                  | 6.24  | 6.66  | 6.78  |
| AZTt                 | ENF    | ATV/r  | 0.39               | 2.07 | 7.44 | 2.07               | 7.44 | 7.44 | 7.44  | 2.46               | 7.84 | 9.51  | 9.91  | 2.54                  | 7.58  | 9.12  | 9.11  |
| 3TCq                 | LPV/rq | MVC    | 2.35               | 6.64 | 1.72 | 6.64               | 2.41 | 6.64 | 6.64  | 8.99               | 4.07 | 8.36  | 10.71 | 7.79                  | 5.32  | 6.64  | 9.35  |
| FTC                  | ddIEC  | ATV    | 2.79               | 2.56 | 5.97 | 3.19               | 5.98 | 6.03 | 6.04  | 5.35               | 8.76 | 8.53  | 11.32 | 3.86                  | 7.53  | 7.81  | 9.06  |
| ddIb                 | ABCb   | EFV    | 0.75               | 1.91 | 7.35 | 2.04               | 7.35 | 7.35 | 7.35  | 2.66               | 8.10 | 9.27  | 10.01 | 2.17                  | 7.77  | 8.81  | 8.98  |
| AZTb                 | 3TCb   | EFV    | 0.37               | 2.30 | 7.35 | 2.30               | 7.35 | 7.35 | 7.35  | 2.67               | 7.72 | 9.66  | 10.03 | 2.91                  | 8.91  | 8.38  | 13.47 |
| ABCb                 | ETR    | NFVt   | 1.91               | 6.31 | 2.76 | 6.31               | 2.96 | 6.40 | 6.40  | 8.22               | 4.67 | 9.06  | 10.98 | 6.62                  | 4.36  | 10.37 | 10.72 |
| ddIEC                | TDF    | LPV/rb | 2.56               | 0.86 | 6.97 | 2.56               | 6.99 | 6.97 | 6.99  | 3.42               | 9.53 | 7.83  | 10.39 | 2.51                  | 8.88  | 7.41  | 8.84  |
| AZTb                 | ABCq   | ATV/r  | 0.37               | 2.14 | 7.44 | 2.14               | 7.44 | 7.44 | 7.44  | 2.51               | 7.81 | 9.59  | 9.95  | 3.07                  | 7.57  | 8.62  | 9.41  |
| AZTt                 | 3TCb   | EFV    | 0.39               | 2.30 | 7.35 | 2.30               | 7.35 | 7.35 | 7.35  | 2.70               | 7.75 | 9.66  | 10.05 | 2.95                  | 9.02  | 8.38  | 13.55 |
| ddIq                 | RAL    | ATV/r  | 0.84               | 1.69 | 7.44 | 1.85               | 7.44 | 7.44 | 7.44  | 2.53               | 8.28 | 9.13  | 9.97  | 2.47                  | 8.04  | 10.00 | 10.29 |
| AZTt                 | ABCq   | ATV/r  | 0.39               | 2.14 | 7.44 | 2.14               | 7.44 | 7.44 | 7.44  | 2.54               | 7.84 | 9.59  | 9.98  | 3.13                  | 7.58  | 8.62  | 9.44  |
| AZTb                 | 3TCq   | EFV    | 0.37               | 2.35 | 7.35 | 2.35               | 7.35 | 7.35 | 7.35  | 2.72               | 7.72 | 9.70  | 10.07 | 2.95                  | 8.91  | 8.40  | 13.56 |
| TDF                  | RAL    | ATV/r  | 0.86               | 1.69 | 7.44 | 1.69               | 7.44 | 7.44 | 7.44  | 2.55               | 8.30 | 9.13  | 9.99  | 2.71                  | 7.80  | 10.00 | 10.13 |
| ABCb                 | ETR    | NFVb   | 1.91               | 6.31 | 2.80 | 6.31               | 3.03 | 6.41 | 6.41  | 8.22               | 4.72 | 9.11  | 11.02 | 6.62                  | 4.41  | 10.43 | 10.77 |
| ENF                  | EVG/c  | LPV/rb | 2.07               | 1.41 | 6.97 | 2.20               | 6.98 | 6.97 | 6.98  | 3.48               | 9.04 | 8.39  | 10.46 | 3.46                  | 8.21  | 9.19  | 10.77 |
| d4T                  | 3TCb   | ATV/r  | 0.25               | 2.30 | 7.44 | 2.31               | 7.44 | 7.44 | 7.44  | 2.55               | 7.69 | 9.75  | 10.00 | 2.72                  | 7.53  | 8.37  | 8.90  |
| AZTt                 | 3TCq   | EFV    | 0.39               | 2.35 | 7.35 | 2.35               | 7.35 | 7.35 | 7.35  | 2.74               | 7.75 | 9.70  | 10.10 | 2.99                  | 9.02  | 8.40  | 13.64 |
| ddIq                 | ABCb   | EFV    | 0.84               | 1.91 | 7.35 | 2.06               | 7.36 | 7.35 | 7.36  | 2.75               | 8.19 | 9.27  | 10.11 | 2.20                  | 7.82  | 8.81  | 9.03  |
| ddIb                 | NVP    | ATV    | 0.75               | 4.43 | 5.97 | 4.45               | 5.98 | 6.31 | 6.32  | 5.18               | 6.71 | 10.40 | 11.14 | 5.05                  | 6.50  | 8.91  | 9.72  |
| FTC                  | ETR    | ENF    | 2.79               | 6.31 | 2.07 | 6.31               | 2.99 | 6.31 | 6.31  | 9.10               | 4.86 | 8.38  | 11.17 | 6.83                  | 4.39  | 8.20  | 9.33  |
| TDF                  | ABCb   | EFV    | 0.86               | 1.91 | 7.35 | 1.92               | 7.35 | 7.35 | 7.35  | 2.77               | 8.21 | 9.27  | 10.13 | 1.89                  | 7.97  | 8.81  | 9.19  |
| d4T                  | 3TCq   | ATV/r  | 0.25               | 2.35 | 7.44 | 2.35               | 7.44 | 7.44 | 7.44  | 2.60               | 7.69 | 9.79  | 10.04 | 2.77                  | 7.53  | 8.39  | 8.93  |
| FTC                  | ddIb   | LPV/rb | 2.79               | 0.75 | 6.97 | 2.85               | 6.97 | 6.98 | 6.98  | 3.54               | 9.76 | 7.72  | 10.51 | 3.06                  | 8.72  | 7.53  | 9.17  |

| Regimen <sup>a</sup> |        |        | HIV <sub>ave</sub> |      |      |                    |      |      |                    |      |      |       |                       |      |       |       |       |
|----------------------|--------|--------|--------------------|------|------|--------------------|------|------|--------------------|------|------|-------|-----------------------|------|-------|-------|-------|
|                      |        |        | Single drug        |      |      | Loewe <sup>b</sup> |      |      | Bliss <sup>c</sup> |      |      |       | DI Index <sup>d</sup> |      |       |       |       |
| Drug 1               | Drug 2 | Drug 3 | 1                  | 2    | 3    | 1,2                | 1,3  | 2,3  | 1,2,3              | 1,2  | 1,3  | 2,3   | 1,2,3                 | 1,2  | 1,3   | 2,3   | 1,2,3 |
| FTC                  | EVG/c  | LPV/rq | 2.79               | 1.41 | 6.64 | 2.80               | 6.64 | 6.64 | 6.64               | 4.20 | 9.43 | 8.05  | 10.84                 | 4.28 | 8.38  | 8.86  | 11.26 |
| ABCq                 | ENF    | LPV/rq | 2.14               | 2.07 | 6.64 | 2.53               | 6.64 | 6.64 | 6.64               | 4.21 | 8.78 | 8.71  | 10.85                 | 3.82 | 7.79  | 7.88  | 9.20  |
| 3TCb                 | ABCb   | LPV/rq | 2.30               | 1.91 | 6.64 | 2.47               | 6.64 | 6.64 | 6.64               | 4.22 | 8.94 | 8.55  | 10.86                 | 2.82 | 7.77  | 7.67  | 8.60  |
| 3TCb                 | ddIEC  | ETR    | 2.30               | 2.56 | 6.31 | 2.91               | 6.31 | 6.33 | 6.33               | 4.86 | 8.61 | 8.87  | 11.17                 | 3.38 | 6.86  | 6.24  | 6.99  |
| ABCq                 | EVG/c  | LPV/rb | 2.14               | 1.41 | 6.97 | 2.20               | 6.97 | 6.97 | 6.97               | 3.56 | 9.12 | 8.39  | 10.53                 | 3.62 | 8.13  | 9.19  | 10.81 |
| d4T                  | ddIEC  | EFV    | 0.25               | 2.56 | 7.35 | 2.56               | 7.35 | 7.36 | 7.36               | 2.81 | 7.60 | 9.91  | 10.16                 | 3.29 | 8.00  | 8.77  | 12.30 |
| ddlbb                | EFV    | ENF    | 0.75               | 7.35 | 2.07 | 7.35               | 2.24 | 7.35 | 7.36               | 8.10 | 2.82 | 9.42  | 10.17                 | 7.77 | 2.71  | 9.20  | 9.46  |
| ETR                  | ENF    | NFVt   | 6.31               | 2.07 | 2.76 | 6.31               | 6.40 | 3.16 | 6.41               | 8.38 | 9.06 | 4.83  | 11.13                 | 8.20 | 10.37 | 5.11  | 12.19 |
| 3TCq                 | ABCb   | LPV/rq | 2.35               | 1.91 | 6.64 | 2.51               | 6.64 | 6.64 | 6.64               | 4.26 | 8.99 | 8.55  | 10.90                 | 2.86 | 7.79  | 7.67  | 8.62  |
| FTC                  | ABCq   | ETR    | 2.79               | 2.14 | 6.31 | 2.90               | 6.31 | 6.31 | 6.31               | 4.93 | 9.10 | 8.45  | 11.24                 | 2.97 | 6.83  | 6.66  | 7.05  |
| ddlbb                | ABCb   | ATV/r  | 0.75               | 1.91 | 7.44 | 2.04               | 7.44 | 7.44 | 7.44               | 2.66 | 8.19 | 9.36  | 10.10                 | 2.17 | 7.97  | 8.49  | 8.99  |
| 3TCq                 | ddIEC  | ETR    | 2.35               | 2.56 | 6.31 | 2.92               | 6.31 | 6.33 | 6.33               | 4.91 | 8.65 | 8.87  | 11.21                 | 3.40 | 6.87  | 6.24  | 7.00  |
| ABCb                 | RAL    | LPV/rb | 1.91               | 1.69 | 6.97 | 2.10               | 6.97 | 6.97 | 6.97               | 3.60 | 8.89 | 8.66  | 10.57                 | 3.45 | 8.00  | 9.20  | 10.38 |
| ddIEC                | RAL    | LPV/rq | 2.56               | 1.69 | 6.64 | 2.66               | 6.66 | 6.64 | 6.66               | 4.25 | 9.20 | 8.33  | 10.89                 | 4.11 | 8.55  | 8.86  | 10.94 |
| AZTb                 | 3TCb   | ATV/r  | 0.37               | 2.30 | 7.44 | 2.30               | 7.44 | 7.44 | 7.44               | 2.67 | 7.81 | 9.75  | 10.11                 | 2.91 | 7.57  | 8.37  | 8.97  |
| ddlq                 | NVP    | ATV    | 0.84               | 4.43 | 5.97 | 4.46               | 5.98 | 6.31 | 6.32               | 5.27 | 6.80 | 10.40 | 11.24                 | 5.12 | 6.57  | 8.91  | 9.79  |
| TDF                  | NVP    | ATV    | 0.86               | 4.43 | 5.97 | 4.43               | 5.97 | 6.31 | 6.31               | 5.29 | 6.83 | 10.40 | 11.26                 | 5.32 | 6.32  | 8.91  | 9.63  |
| FTC                  | ddlq   | LPV/rb | 2.79               | 0.84 | 6.97 | 2.86               | 6.97 | 6.98 | 6.98               | 3.63 | 9.76 | 7.81  | 10.60                 | 3.10 | 8.72  | 7.60  | 9.23  |
| AZTt                 | 3TCb   | ATV/r  | 0.39               | 2.30 | 7.44 | 2.30               | 7.44 | 7.44 | 7.44               | 2.70 | 7.84 | 9.75  | 10.14                 | 2.95 | 7.58  | 8.37  | 8.99  |
| ddIEC                | LPV/rq | MVC    | 2.56               | 6.64 | 1.72 | 6.66               | 2.62 | 6.64 | 6.66               | 9.20 | 4.28 | 8.36  | 10.92                 | 8.55 | 4.48  | 6.64  | 9.13  |
| ETR                  | ENF    | NFVb   | 6.31               | 2.07 | 2.80 | 6.31               | 6.41 | 3.15 | 6.41               | 8.38 | 9.11 | 4.87  | 11.18                 | 8.20 | 10.43 | 5.17  | 12.25 |
| FTC                  | TDF    | LPV/rb | 2.79               | 0.86 | 6.97 | 2.79               | 6.97 | 6.97 | 6.97               | 3.65 | 9.76 | 7.83  | 10.62                 | 3.07 | 8.72  | 7.41  | 8.91  |
| ddlbb                | ABCq   | EFV    | 0.75               | 2.14 | 7.35 | 2.24               | 7.35 | 7.35 | 7.35               | 2.89 | 8.10 | 9.50  | 10.24                 | 2.38 | 7.77  | 8.98  | 9.11  |
| AZTb                 | 3TCq   | ATV/r  | 0.37               | 2.35 | 7.44 | 2.35               | 7.44 | 7.44 | 7.44               | 2.72 | 7.81 | 9.79  | 10.16                 | 2.95 | 7.57  | 8.39  | 9.00  |
| ABCq                 | ETR    | NFVt   | 2.14               | 6.31 | 2.76 | 6.31               | 3.04 | 6.40 | 6.40               | 8.45 | 4.90 | 9.06  | 11.20                 | 6.66 | 4.56  | 10.37 | 10.93 |
| ddlq                 | EFV    | ENF    | 0.84               | 7.35 | 2.07 | 7.36               | 2.26 | 7.35 | 7.36               | 8.19 | 2.91 | 9.42  | 10.26                 | 7.82 | 2.79  | 9.20  | 9.53  |
| AZTt                 | 3TCq   | ATV/r  | 0.39               | 2.35 | 7.44 | 2.35               | 7.44 | 7.44 | 7.44               | 2.74 | 7.84 | 9.79  | 10.18                 | 2.99 | 7.58  | 8.39  | 9.02  |
| TDF                  | EFV    | ENF    | 0.86               | 7.35 | 2.07 | 7.35               | 2.08 | 7.35 | 7.35               | 8.21 | 2.93 | 9.42  | 10.28                 | 7.97 | 2.62  | 9.20  | 9.66  |
| ddlq                 | ABCb   | ATV/r  | 0.84               | 1.91 | 7.44 | 2.06               | 7.44 | 7.44 | 7.44               | 2.75 | 8.28 | 9.36  | 10.20                 | 2.20 | 8.04  | 8.49  | 9.04  |
| AZTb                 | ddIEC  | EFV    | 0.37               | 2.56 | 7.35 | 2.56               | 7.35 | 7.36 | 7.36               | 2.93 | 7.72 | 9.91  | 10.28                 | 3.41 | 8.91  | 8.77  | 14.33 |
| 3TCb                 | ENF    | LPV/rq | 2.30               | 2.07 | 6.64 | 2.63               | 6.64 | 6.64 | 6.64               | 4.37 | 8.94 | 8.71  | 11.01                 | 4.55 | 7.77  | 7.88  | 9.57  |
| TDF                  | ABCb   | ATV/r  | 0.86               | 1.91 | 7.44 | 1.92               | 7.44 | 7.44 | 7.44               | 2.77 | 8.30 | 9.36  | 10.22                 | 1.89 | 7.80  | 8.49  | 8.64  |
| ABCq                 | ETR    | NFVb   | 2.14               | 6.31 | 2.80 | 6.31               | 3.10 | 6.41 | 6.41               | 8.45 | 4.94 | 9.11  | 11.25                 | 6.66 | 4.61  | 10.43 | 10.98 |
| 3TCb                 | EVG/c  | LPV/rb | 2.30               | 1.41 | 6.97 | 2.35               | 6.97 | 6.97 | 6.97               | 3.72 | 9.28 | 8.39  | 10.69                 | 4.06 | 8.10  | 9.19  | 11.06 |
| AZTt                 | ddIEC  | EFV    | 0.39               | 2.56 | 7.35 | 2.56               | 7.35 | 7.36 | 7.36               | 2.95 | 7.75 | 9.91  | 10.31                 | 3.46 | 9.02  | 8.77  | 14.42 |
| ddlq                 | ABCq   | EFV    | 0.84               | 2.14 | 7.35 | 2.25               | 7.36 | 7.35 | 7.36               | 2.98 | 8.19 | 9.50  | 10.33                 | 2.41 | 7.82  | 8.98  | 9.16  |
| 3TCq                 | ENF    | LPV/rq | 2.35               | 2.07 | 6.64 | 2.67               | 6.64 | 6.64 | 6.64               | 4.42 | 8.99 | 8.71  | 11.06                 | 4.60 | 7.79  | 7.88  | 9.61  |
| ddlbb                | ENF    | ATV/r  | 0.75               | 2.07 | 7.44 | 2.24               | 7.44 | 7.44 | 7.45               | 2.82 | 8.19 | 9.51  | 10.26                 | 2.71 | 7.97  | 9.12  | 9.62  |
| ENF                  | RAL    | LPV/rb | 2.07               | 1.69 | 6.97 | 2.29               | 6.98 | 6.97 | 6.98               | 3.76 | 9.04 | 8.66  | 10.73                 | 3.96 | 8.21  | 9.20  | 10.76 |
| d4T                  | ddIEC  | ATV/r  | 0.25               | 2.56 | 7.44 | 2.56               | 7.44 | 7.45 | 7.45               | 2.81 | 7.69 | 10.00 | 10.25                 | 3.29 | 7.53  | 9.27  | 10.09 |
| TDF                  | ABCq   | EFV    | 0.86               | 2.14 | 7.35 | 2.14               | 7.35 | 7.35 | 7.35               | 3.00 | 8.21 | 9.50  | 10.36                 | 2.11 | 7.97  | 8.98  | 9.32  |
| 3TCq                 | EVG/c  | LPV/rb | 2.35               | 1.41 | 6.97 | 2.39               | 6.97 | 6.97 | 6.97               | 3.76 | 9.32 | 8.39  | 10.74                 | 4.10 | 8.12  | 9.19  | 11.11 |
| 3TCb                 | ABCq   | LPV/rq | 2.30               | 2.14 | 6.64 | 2.56               | 6.64 | 6.64 | 6.64               | 4.45 | 8.94 | 8.78  | 11.09                 | 2.93 | 7.77  | 7.79  | 8.70  |
| d4T                  | FTC    | EFV    | 0.25               | 2.79 | 7.35 | 2.79               | 7.35 | 7.35 | 7.35               | 3.04 | 7.60 | 10.14 | 10.39                 | 3.21 | 8.00  | 8.63  | 11.98 |
| d4T                  | EFV    | NFVt   | 0.25               | 7.35 | 2.76 | 7.35               | 2.76 | 7.39 | 7.39               | 7.60 | 3.01 | 10.11 | 10.36                 | 8.00 | 2.92  | 10.85 | 12.36 |
| 3TCb                 | ddlbb  | EFV    | 2.30               | 0.75 | 7.35 | 2.39               | 7.35 | 7.35 | 7.35               | 3.05 | 9.66 | 8.10  | 10.40                 | 2.55 | 8.38  | 7.77  | 8.76  |
| FTC                  | RAL    | LPV/rq | 2.79               | 1.69 | 6.64 | 2.82               | 6.64 | 6.64 | 6.64               | 4.48 | 9.43 | 8.33  | 11.12                 | 4.61 | 8.38  | 8.86  | 11.13 |
| 3TCb                 | ETR    | NFVt   | 2.30               | 6.31 | 2.76 | 6.31               | 3.12 | 6.40 | 6.40               | 8.61 | 5.06 | 9.06  | 11.37                 | 6.86 | 4.32  | 10.37 | 10.97 |
| 3TCq                 | ABCq   | LPV/rq | 2.35               | 2.14 | 6.64 | 2.59               | 6.64 | 6.64 | 6.64               | 4.49 | 8.99 | 8.78  | 11.13                 | 2.96 | 7.79  | 7.79  | 8.72  |
| ddlbb                | ABCq   | ATV/r  | 0.75               | 2.14 | 7.44 | 2.24               | 7.44 | 7.44 | 7.44               | 2.89 | 8.19 | 9.59  | 10.33                 | 2.38 | 7.97  | 8.62  | 9.11  |
| ddIEC                | ABCb   | LPV/rq | 2.56               | 1.91 | 6.64 | 2.74               | 6.66 | 6.64 | 6.66               | 4.47 | 9.20 | 8.55  | 11.11                 | 3.11 | 8.55  | 7.67  | 9.23  |
| ABCq                 | RAL    | LPV/rb | 2.14               | 1.69 | 6.97 | 2.26               | 6.97 | 6.97 | 6.97               | 3.83 | 9.12 | 8.66  | 10.80                 | 3.68 | 8.13  | 9.20  | 10.59 |
| FTC                  | LPV/rq | MVC    | 2.79               | 6.64 | 1.72 | 6.64               | 2.80 | 6.64 | 6.64               | 9.43 | 4.51 | 8.36  | 11.15                 | 8.38 | 4.79  | 6.64  | 9.10  |
| ddlq                 | ENF    | ATV/r  | 0.84               | 2.07 | 7.44 | 2.26               | 7.44 | 7.44 | 7.45               | 2.91 | 8.28 | 9.51  | 10.35                 | 2.79 | 8.04  | 9.12  | 9.69  |
| d4T                  | EFV    | NFVb   | 0.25               | 7.35 | 2.80 | 7.35               | 2.80 | 7.40 | 7.40               | 7.60 | 3.05 | 10.15 | 10.40                 | 8.00 | 2.96  | 10.90 | 12.42 |
| 3TCq                 | ddlbb  | EFV    | 2.35               | 0.75 | 7.35 | 2.44               | 7.35 | 7.35 | 7.35               | 3.10 | 9.70 | 8.10  | 10.45                 | 2.59 | 8.40  | 7.77  | 8.78  |
| 3TCq                 | ETR    | NFVt   | 2.35               | 6.31 | 2.76 | 6.31               | 3.14 | 6.40 | 6.40               | 8.65 | 5.11 | 9.06  | 11.41                 | 6.87 | 4.35  | 10.37 | 11.00 |
| TDF                  | ENF    | ATV/r  | 0.86               | 2.07 | 7.44 | 2.08               | 7.44 | 7.44 | 7.44               | 2.93 | 8.30 | 9.51  | 10.37                 | 2.63 | 7.80  | 9.12  | 9.29  |
| 3TCb                 | ETR    | NFVb   | 2.30               | 6.31 | 2.80 | 6.31               | 3.17 | 6.41 | 6.41               | 8.61 | 5.11 | 9.11  | 11.41                 | 6.86 | 4.36  | 10.43 | 11.02 |
| AZTb                 | ddIEC  | ATV/r  | 0.37               | 2.56 | 7.44 | 2.56               | 7.44 | 7.45 | 7.45               | 2.93 | 7.81 | 10.00 | 10.37                 | 3.41 | 7.57  | 9.27  | 9.91  |
| EFV                  | EVG/c  | MVC    | 7.35               | 1.41 | 1.72 | 7.35               | 7.35 | 1.84 | 7.35               | 8.77 | 9.08 | 3.14  | 10.49                 | 8.86 | 10.23 | 3.20  | 11.56 |
| EFV                  | EVG/c  | MVC    | 7.35               | 1.41 | 1.72 | 7.35               | 7.35 | 1.84 | 7.35               | 8.77 | 9.08 | 3.14  | 10.49                 | 8.86 | 10.23 | 3.20  | 11.56 |
| AZTt                 | ddIEC  | ATV/r  | 0.39               | 2.56 | 7.44 | 2.56               | 7.44 | 7.45 | 7.45               | 2.95 | 7.84 | 10.00 | 10.40                 | 3.46 | 7.58  | 9.27  | 9.94  |
| 3TCb                 | ddlq   | EFV    | 2.30               | 0.84 | 7.35 | 2.41               | 7.35 | 7.36 | 7.36               | 3.14 | 9.66 | 8.19  | 10.50                 | 2.58 | 8.38  | 7.82  | 8.81  |
| AZTb                 | FTC    | EFV    | 0.37               | 2.79 | 7.35 | 2.79               | 7.35 | 7.35 | 7.35               | 3.16 | 7.72 | 10.14 | 10.51                 | 3.55 | 8.91  | 8.63  | 14.69 |
| ddlq                 | ABCq   | ATV/r  | 0.84               | 2.14 | 7.44 | 2.25               | 7.44 | 7.44 | 7.44               | 2.98 | 8.28 | 9.59  | 10.42                 | 2.41 | 8.04  | 8.62  | 9.16  |
| 3TCq                 | ETR    | NFVb   | 2.35               | 6.31 | 2.80 | 6.31               | 3.20 | 6.41 | 6.41               | 8.65 | 5.15 | 9.11  | 11.46                 | 6.87 | 4.40  | 10.43 | 11.05 |
| 3TCb                 | TDF    | EFV    | 2.30               | 0.86 | 7.35 | 2.30               | 7.35 | 7.35 | 7.35               | 3.16 | 9.66 | 8.21  | 10.52                 | 2.97 | 8.38  | 7.97  | 9.28  |
| AZTb                 | EFV    | NFVt   | 0.37               | 7.35 | 2.76 | 7.35               | 2.76 | 7.39 | 7.39               | 7.72 | 3.12 | 10.11 | 10.48                 | 8.91 | 3.20  | 10.85 | 14.81 |
| TDF                  | ABCq   | ATV/r  | 0.86               | 2.14 | 7.44 | 2.14               | 7.44 | 7.44 | 7.44               | 3.00 | 8.30 | 9.59  | 10.44                 | 2.11 | 7.80  | 8.62  | 8.72  |

| Regimen <sup>a</sup> |        |        | IIP <sub>ave</sub> |      |      |                    |      |      |       |                    |       |       |       |                       |       |       |       |
|----------------------|--------|--------|--------------------|------|------|--------------------|------|------|-------|--------------------|-------|-------|-------|-----------------------|-------|-------|-------|
|                      |        |        | Single drug        |      |      | Loewe <sup>b</sup> |      |      |       | Bliss <sup>c</sup> |       |       |       | DI Index <sup>d</sup> |       |       |       |
| Drug 1               | Drug 2 | Drug 3 | 1                  | 2    | 3    | 1,2                | 1,3  | 2,3  | 1,2,3 | 1,2                | 1,3   | 2,3   | 1,2,3 | 1,2                   | 1,3   | 2,3   | 1,2,3 |
| AZTt                 | FTC    | EFV    | 0.39               | 2.79 | 7.35 | 2.79               | 7.35 | 7.35 | 7.35  | 3.18               | 7.75  | 10.14 | 10.54 | 3.60                  | 9.02  | 8.63  | 14.78 |
| 3TCq                 | ddlq   | EFV    | 2.35               | 0.84 | 7.35 | 2.45               | 7.35 | 7.36 | 7.36  | 3.19               | 9.70  | 8.19  | 10.54 | 2.62                  | 8.40  | 7.82  | 8.83  |
| AZTt                 | EFV    | NFVt   | 0.39               | 7.35 | 2.76 | 7.35               | 2.76 | 7.39 | 7.39  | 7.75               | 3.15  | 10.11 | 10.50 | 9.02                  | 3.23  | 10.85 | 14.89 |
| 3TCq                 | TDF    | EFV    | 2.35               | 0.86 | 7.35 | 2.35               | 7.35 | 7.35 | 7.35  | 3.21               | 9.70  | 8.21  | 10.56 | 3.02                  | 8.40  | 7.97  | 9.30  |
| AZTb                 | EFV    | NFVb   | 0.37               | 7.35 | 2.80 | 7.35               | 2.80 | 7.40 | 7.40  | 7.72               | 3.17  | 10.15 | 10.52 | 8.91                  | 3.25  | 10.90 | 14.88 |
| d4T                  | FTC    | ATV/r  | 0.25               | 2.79 | 7.44 | 2.79               | 7.44 | 7.44 | 7.44  | 3.04               | 7.69  | 10.23 | 10.48 | 3.21                  | 7.53  | 9.00  | 9.46  |
| ABCb                 | ENF    | LPV/rb | 1.91               | 2.07 | 6.97 | 2.41               | 6.97 | 6.98 | 6.98  | 3.98               | 8.89  | 9.04  | 10.96 | 3.62                  | 8.00  | 8.21  | 9.38  |
| ddIEC                | ENF    | LPV/rq | 2.56               | 2.07 | 6.64 | 2.94               | 6.66 | 6.64 | 6.66  | 4.63               | 9.20  | 8.71  | 11.27 | 4.33                  | 8.55  | 7.88  | 9.92  |
| 3TCb                 | ddlq   | ATV/r  | 2.30               | 0.75 | 7.44 | 2.39               | 7.44 | 7.44 | 7.44  | 3.05               | 9.75  | 8.19  | 10.49 | 2.55                  | 8.37  | 7.97  | 9.00  |
| ddIEC                | EVG/c  | LPV/rb | 2.56               | 1.41 | 6.97 | 2.60               | 6.99 | 6.97 | 6.99  | 3.97               | 9.53  | 8.39  | 10.95 | 4.20                  | 8.88  | 9.19  | 11.60 |
| 3TCb                 | RAL    | LPV/rb | 2.30               | 1.69 | 6.97 | 2.39               | 6.97 | 6.97 | 6.97  | 3.99               | 9.28  | 8.66  | 10.97 | 4.00                  | 8.10  | 9.20  | 10.74 |
| AZTt                 | EFV    | NFVb   | 0.39               | 7.35 | 2.80 | 7.35               | 2.80 | 7.40 | 7.40  | 7.75               | 3.19  | 10.15 | 10.55 | 9.02                  | 3.28  | 10.90 | 14.96 |
| 3TCq                 | ddlq   | ATV/r  | 2.35               | 0.75 | 7.44 | 2.44               | 7.44 | 7.44 | 7.44  | 3.10               | 9.79  | 8.19  | 10.54 | 2.59                  | 8.39  | 7.97  | 9.03  |
| 3TCq                 | RAL    | LPV/rb | 2.35               | 1.69 | 6.97 | 2.44               | 6.97 | 6.97 | 6.97  | 4.04               | 9.32  | 8.66  | 11.01 | 4.04                  | 8.12  | 9.20  | 10.78 |
| FTC                  | ABCb   | LPV/rq | 2.79               | 1.91 | 6.64 | 2.86               | 6.64 | 6.64 | 6.64  | 4.70               | 9.43  | 8.55  | 11.34 | 2.92                  | 8.38  | 7.67  | 8.98  |
| FTC                  | ddIEC  | ETR    | 2.79               | 2.56 | 6.31 | 3.19               | 6.31 | 6.33 | 6.34  | 5.35               | 9.10  | 8.87  | 11.66 | 3.86                  | 6.83  | 6.24  | 7.05  |
| ddIEC                | ABCq   | LPV/rq | 2.56               | 2.14 | 6.64 | 2.82               | 6.66 | 6.64 | 6.66  | 4.70               | 9.20  | 8.78  | 11.34 | 3.21                  | 8.55  | 7.79  | 9.35  |
| 3TCb                 | ddlq   | ATV/r  | 2.30               | 0.84 | 7.44 | 2.41               | 7.44 | 7.44 | 7.44  | 3.14               | 9.75  | 8.28  | 10.59 | 2.58                  | 8.37  | 8.04  | 9.05  |
| ABCb                 | EFV    | EVG/c  | 1.91               | 7.35 | 1.41 | 7.35               | 2.02 | 7.35 | 7.35  | 9.27               | 3.33  | 8.77  | 10.68 | 8.81                  | 3.39  | 8.86  | 10.47 |
| AZTb                 | FTC    | ATV/r  | 0.37               | 2.79 | 7.44 | 2.79               | 7.44 | 7.44 | 7.44  | 3.16               | 7.81  | 10.23 | 10.60 | 3.55                  | 7.57  | 9.00  | 9.80  |
| 3TCb                 | TDF    | ATV/r  | 2.30               | 0.86 | 7.44 | 2.30               | 7.44 | 7.44 | 7.44  | 3.16               | 9.75  | 8.30  | 10.61 | 2.97                  | 8.37  | 7.80  | 8.92  |
| ddIEC                | ETR    | NFVt   | 2.56               | 6.31 | 2.76 | 6.33               | 3.48 | 6.40 | 6.43  | 8.87               | 5.32  | 9.06  | 11.62 | 6.24                  | 4.64  | 10.37 | 10.88 |
| AZTt                 | FTC    | ATV/r  | 0.39               | 2.79 | 7.44 | 2.79               | 7.44 | 7.44 | 7.44  | 3.18               | 7.84  | 10.23 | 10.63 | 3.60                  | 7.58  | 9.00  | 9.83  |
| 3TCq                 | ddlq   | ATV/r  | 2.35               | 0.84 | 7.44 | 2.45               | 7.44 | 7.44 | 7.44  | 3.19               | 9.79  | 8.28  | 10.63 | 2.62                  | 8.39  | 8.04  | 9.07  |
| 3TCq                 | TDF    | ATV/r  | 2.35               | 0.86 | 7.44 | 2.35               | 7.44 | 7.44 | 7.44  | 3.21               | 9.79  | 8.30  | 10.65 | 3.02                  | 8.39  | 7.80  | 8.94  |
| ddIEC                | ETR    | NFVb   | 2.56               | 6.31 | 2.80 | 6.33               | 3.53 | 6.41 | 6.44  | 8.87               | 5.36  | 9.11  | 11.67 | 6.24                  | 4.69  | 10.43 | 10.93 |
| EFV                  | RAL    | MVC    | 7.35               | 1.69 | 1.72 | 7.35               | 7.35 | 1.94 | 7.35  | 9.04               | 9.08  | 3.41  | 10.76 | 9.55                  | 10.23 | 3.94  | 12.37 |
| EFV                  | RAL    | MVC    | 7.35               | 1.69 | 1.72 | 7.35               | 7.35 | 1.94 | 7.35  | 9.04               | 9.08  | 3.41  | 10.76 | 9.55                  | 10.23 | 3.94  | 12.37 |
| d4T                  | NVP    | LPV/rq | 0.25               | 4.43 | 6.64 | 4.43               | 6.64 | 6.80 | 6.80  | 4.68               | 6.89  | 11.07 | 11.32 | 4.90                  | 6.80  | 10.51 | 11.40 |
| NVP                  | EVG/c  | ATV    | 4.43               | 1.41 | 5.97 | 4.43               | 6.31 | 5.97 | 6.31  | 5.85               | 10.40 | 7.38  | 11.81 | 7.01                  | 8.91  | 8.10  | 13.32 |
| ddIEC                | TDF    | EFV    | 2.56               | 0.86 | 7.35 | 2.56               | 7.36 | 7.35 | 7.36  | 3.42               | 9.91  | 8.21  | 10.77 | 2.51                  | 8.77  | 7.97  | 9.20  |
| FTC                  | ENF    | LPV/rq | 2.79               | 2.07 | 6.64 | 2.99               | 6.64 | 6.64 | 6.64  | 4.86               | 9.43  | 8.71  | 11.50 | 4.39                  | 8.38  | 7.88  | 9.76  |
| FTC                  | EVG/c  | LPV/rb | 2.79               | 1.41 | 6.97 | 2.80               | 6.97 | 6.97 | 6.97  | 4.20               | 9.76  | 8.39  | 11.18 | 4.28                  | 8.72  | 9.19  | 11.59 |
| ABCb                 | ENF    | LPV/rb | 2.14               | 2.07 | 6.97 | 2.53               | 6.97 | 6.98 | 6.98  | 4.21               | 9.12  | 9.04  | 11.19 | 3.82                  | 8.13  | 8.21  | 9.53  |
| 3TCb                 | ABCb   | LPV/rb | 2.30               | 1.91 | 6.97 | 2.47               | 6.97 | 6.97 | 6.97  | 4.22               | 9.28  | 8.89  | 11.19 | 2.82                  | 8.10  | 8.00  | 8.94  |
| 3TCb                 | ddIEC  | LPV/rq | 2.30               | 2.56 | 6.64 | 2.91               | 6.64 | 6.66 | 6.66  | 4.86               | 8.94  | 9.20  | 11.50 | 3.38                  | 7.77  | 8.55  | 9.36  |
| EFV                  | ENF    | EVG/c  | 7.35               | 2.07 | 1.41 | 7.35               | 7.35 | 2.20 | 7.35  | 9.42               | 8.77  | 3.48  | 10.84 | 9.20                  | 8.86  | 3.46  | 10.76 |
| 3TCq                 | ABCb   | LPV/rb | 2.35               | 1.91 | 6.97 | 2.51               | 6.97 | 6.97 | 6.97  | 4.26               | 9.32  | 8.89  | 11.24 | 2.86                  | 8.12  | 8.00  | 8.96  |
| ddIEC                | RAL    | LPV/rb | 2.56               | 1.69 | 6.97 | 2.66               | 6.99 | 6.97 | 6.99  | 4.25               | 9.53  | 8.66  | 11.22 | 4.11                  | 8.88  | 9.20  | 11.28 |
| 3TCq                 | ddIEC  | LPV/rq | 2.35               | 2.56 | 6.64 | 2.92               | 6.64 | 6.66 | 6.66  | 4.91               | 8.99  | 9.20  | 11.55 | 3.40                  | 7.79  | 8.55  | 9.38  |
| ABCb                 | EVG/c  | ATV/r  | 1.91               | 1.41 | 7.44 | 2.02               | 7.44 | 7.44 | 7.44  | 3.33               | 9.36  | 8.86  | 10.77 | 3.39                  | 8.49  | 9.57  | 10.95 |
| FTC                  | ABCq   | LPV/rq | 2.79               | 2.14 | 6.64 | 2.90               | 6.64 | 6.64 | 6.64  | 4.93               | 9.43  | 8.78  | 11.57 | 2.97                  | 8.38  | 7.79  | 9.10  |
| AZTb                 | NVP    | LPV/rq | 0.37               | 4.43 | 6.64 | 4.43               | 6.64 | 6.80 | 6.80  | 4.80               | 7.01  | 11.07 | 11.44 | 5.28                  | 7.14  | 10.51 | 13.07 |
| FTC                  | ddlq   | EFV    | 2.79               | 0.75 | 7.35 | 2.85               | 7.35 | 7.35 | 7.35  | 3.54               | 10.14 | 8.10  | 10.89 | 3.06                  | 8.63  | 7.77  | 9.03  |
| ddlq                 | EFV    | NFVt   | 0.75               | 7.35 | 2.76 | 7.35               | 2.92 | 7.39 | 7.40  | 8.10               | 3.50  | 10.11 | 10.86 | 7.77                  | 3.29  | 10.85 | 10.58 |
| FTC                  | ETR    | NFVt   | 2.79               | 6.31 | 2.76 | 6.31               | 3.38 | 6.40 | 6.41  | 9.10               | 5.55  | 9.06  | 11.85 | 6.83                  | 4.99  | 10.37 | 11.43 |
| AZTt                 | NVP    | LPV/rq | 0.39               | 4.43 | 6.64 | 4.43               | 6.64 | 6.80 | 6.80  | 4.83               | 7.03  | 11.07 | 11.46 | 5.33                  | 7.17  | 10.51 | 13.12 |
| ABCq                 | EFV    | EVG/c  | 2.14               | 7.35 | 1.41 | 7.35               | 2.20 | 7.35 | 7.35  | 9.50               | 3.56  | 8.77  | 10.91 | 8.98                  | 3.62  | 8.86  | 10.68 |
| ddlq                 | EFV    | NFVb   | 0.75               | 7.35 | 2.80 | 7.35               | 2.96 | 7.40 | 7.40  | 8.10               | 3.55  | 10.15 | 10.90 | 7.77                  | 3.33  | 10.90 | 10.63 |
| ABCb                 | EFV    | RAL    | 1.91               | 7.35 | 1.69 | 7.35               | 2.10 | 7.35 | 7.35  | 9.27               | 3.60  | 9.04  | 10.95 | 8.81                  | 3.45  | 9.55  | 11.03 |
| FTC                  | ETR    | NFVb   | 2.79               | 6.31 | 2.80 | 6.31               | 3.44 | 6.41 | 6.41  | 9.10               | 5.59  | 9.11  | 11.90 | 6.83                  | 5.04  | 10.43 | 11.48 |
| ddIEC                | TDF    | ATV/r  | 2.56               | 0.86 | 7.44 | 2.56               | 7.45 | 7.44 | 7.45  | 3.42               | 10.00 | 8.30  | 10.86 | 2.51                  | 9.27  | 7.80  | 9.15  |
| 3TCb                 | ENF    | LPV/rb | 2.30               | 2.07 | 6.97 | 2.63               | 6.97 | 6.98 | 6.98  | 4.37               | 9.28  | 9.04  | 11.35 | 4.55                  | 8.10  | 8.21  | 9.89  |
| FTC                  | ddlq   | EFV    | 2.79               | 0.84 | 7.35 | 2.86               | 7.35 | 7.36 | 7.36  | 3.63               | 10.14 | 8.19  | 10.98 | 3.10                  | 8.63  | 7.82  | 9.07  |
| ABCb                 | EFV    | MVC    | 1.91               | 7.35 | 1.72 | 7.35               | 2.07 | 7.35 | 7.35  | 9.27               | 3.64  | 9.08  | 10.99 | 8.81                  | 4.16  | 10.23 | 11.95 |
| ABCb                 | EFV    | MVC    | 1.91               | 7.35 | 1.72 | 7.35               | 2.07 | 7.35 | 7.35  | 9.27               | 3.64  | 9.08  | 10.99 | 8.81                  | 4.16  | 10.23 | 11.95 |
| ddlq                 | EFV    | NFVt   | 0.84               | 7.35 | 2.76 | 7.36               | 2.93 | 7.39 | 7.40  | 8.19               | 3.60  | 10.11 | 10.95 | 7.82                  | 3.35  | 10.85 | 10.66 |
| FTC                  | TDF    | EFV    | 2.79               | 0.86 | 7.35 | 2.79               | 7.35 | 7.35 | 7.35  | 3.65               | 10.14 | 8.21  | 11.00 | 3.07                  | 8.63  | 7.97  | 9.33  |
| TDF                  | EFV    | NFVt   | 0.86               | 7.35 | 2.76 | 7.35               | 2.76 | 7.39 | 7.39  | 8.21               | 3.62  | 10.11 | 10.97 | 7.97                  | 3.16  | 10.85 | 10.80 |
| 3TCq                 | ENF    | LPV/rb | 2.35               | 2.07 | 6.97 | 2.67               | 6.97 | 6.98 | 6.98  | 4.42               | 9.32  | 9.04  | 11.39 | 4.60                  | 8.12  | 8.21  | 9.92  |
| ENF                  | EVG/c  | ATV/r  | 2.07               | 1.41 | 7.44 | 2.20               | 7.44 | 7.44 | 7.44  | 3.48               | 9.51  | 8.86  | 10.93 | 3.46                  | 9.12  | 9.57  | 11.40 |
| ddlq                 | EFV    | NFVb   | 0.84               | 7.35 | 2.80 | 7.36               | 2.98 | 7.40 | 7.40  | 8.19               | 3.64  | 10.15 | 10.99 | 7.82                  | 3.40  | 10.90 | 10.71 |
| 3TCb                 | ABCq   | LPV/rb | 2.30               | 2.14 | 6.97 | 2.56               | 6.97 | 6.97 | 6.97  | 4.45               | 9.28  | 9.12  | 11.42 | 2.93                  | 8.10  | 8.13  | 9.04  |
| NVP                  | RAL    | ATV    | 4.43               | 1.69 | 5.97 | 4.43               | 6.31 | 5.97 | 6.31  | 6.12               | 10.40 | 7.65  | 12.09 | 6.36                  | 8.91  | 8.52  | 12.59 |
| TDF                  | EFV    | NFVb   | 0.86               | 7.35 | 2.80 | 7.35               | 2.80 | 7.40 | 7.40  | 8.21               | 3.66  | 10.15 | 11.01 | 7.97                  | 3.20  | 10.90 | 10.85 |
| FTC                  | ddlq   | ATV/r  | 2.79               | 0.75 | 7.44 | 2.85               | 7.44 | 7.44 | 7.45  | 3.54               | 10.23 | 8.19  | 10.98 | 3.06                  | 9.00  | 7.97  | 9.50  |
| FTC                  | RAL    | LPV/rb | 2.79               | 1.69 | 6.97 | 2.82               | 6.97 | 6.97 | 6.97  | 4.48               | 9.76  | 8.66  | 11.45 | 4.61                  | 8.72  | 9.20  | 11.46 |
| 3TCb                 | EFV    | EVG/c  | 2.30               | 7.35 | 1.41 | 7.35               | 2.35 | 7.35 | 7.35  | 9.66               | 3.72  | 8.77  | 11.07 | 8.38                  | 4.06  | 8.86  | 10.54 |
| ddIEC                | ABCb   | LPV/rb | 2.56               | 1.91 | 6.97 | 2.74               | 6.99 | 6.97 | 6.99  | 4.47               | 9.53  | 8.89  | 11.45 | 3.11                  | 8.88  | 8.00  | 9.57  |
| 3TCq                 | ABCq   | LPV/rb | 2.35               | 2.14 | 6.97 | 2.59               | 6.97 | 6.97 | 6.97  | 4.49               | 9.32  | 9.12  | 11.47 | 2.96                  | 8.12  | 8.13  | 9.06  |

| Regimen <sup>a</sup> |        |        | HIV <sub>ave</sub> |      |      |                    |      |      |       |                    |       |       |       |                       |       |       |       |
|----------------------|--------|--------|--------------------|------|------|--------------------|------|------|-------|--------------------|-------|-------|-------|-----------------------|-------|-------|-------|
|                      |        |        | Single drug        |      |      | Loewe <sup>b</sup> |      |      |       | Bliss <sup>c</sup> |       |       |       | DI Index <sup>d</sup> |       |       |       |
| Drug 1               | Drug 2 | Drug 3 | 1                  | 2    | 3    | 1,2                | 1,3  | 2,3  | 1,2,3 | 1,2                | 1,3   | 2,3   | 1,2,3 | 1,2                   | 1,3   | 2,3   | 1,2,3 |
| ABCq                 | EVG/c  | ATV/r  | 2.14               | 1.41 | 7.44 | 2.20               | 7.44 | 7.44 | 7.44  | 3.56               | 9.59  | 8.86  | 11.00 | 3.62                  | 8.62  | 9.57  | 11.18 |
| EFV                  | ENF    | RAL    | 7.35               | 2.07 | 1.69 | 7.35               | 7.35 | 2.29 | 7.35  | 9.42               | 9.04  | 3.76  | 11.11 | 9.20                  | 9.55  | 3.96  | 11.52 |
| 3TCq                 | EFV    | EVG/c  | 2.35               | 7.35 | 1.41 | 7.35               | 2.39 | 7.35 | 7.35  | 9.70               | 3.76  | 8.77  | 11.12 | 8.40                  | 4.10  | 8.86  | 10.58 |
| ABCb                 | RAL    | ATV/r  | 1.91               | 1.69 | 7.44 | 2.10               | 7.44 | 7.44 | 7.44  | 3.60               | 9.36  | 9.13  | 11.04 | 3.45                  | 8.49  | 10.00 | 11.21 |
| EFV                  | ENF    | MVC    | 7.35               | 2.07 | 1.72 | 7.35               | 7.35 | 2.26 | 7.35  | 9.42               | 9.08  | 3.79  | 11.15 | 9.20                  | 10.23 | 4.70  | 12.50 |
| EFV                  | ENF    | MVC    | 7.35               | 2.07 | 1.72 | 7.35               | 7.35 | 2.26 | 7.35  | 9.42               | 9.08  | 3.79  | 11.15 | 9.20                  | 10.23 | 4.70  | 12.50 |
| FTC                  | ddlq   | ATV/r  | 2.79               | 0.84 | 7.44 | 2.86               | 7.44 | 7.44 | 7.45  | 3.63               | 10.23 | 8.28  | 11.07 | 3.10                  | 9.00  | 8.04  | 9.56  |
| FTC                  | TDF    | ATV/r  | 2.79               | 0.86 | 7.44 | 2.79               | 7.44 | 7.44 | 7.44  | 3.65               | 10.23 | 8.30  | 11.09 | 3.07                  | 9.00  | 7.80  | 9.15  |
| ABCq                 | EFV    | RAL    | 2.14               | 7.35 | 1.69 | 7.35               | 2.26 | 7.35 | 7.35  | 9.50               | 3.83  | 9.04  | 11.18 | 8.98                  | 3.68  | 9.55  | 11.25 |
| ABCq                 | EFV    | MVC    | 2.14               | 7.35 | 1.72 | 7.35               | 2.23 | 7.35 | 7.35  | 9.50               | 3.87  | 9.08  | 11.22 | 8.98                  | 4.41  | 10.23 | 12.23 |
| ABCq                 | EFV    | MVC    | 2.14               | 7.35 | 1.72 | 7.35               | 2.23 | 7.35 | 7.35  | 9.50               | 3.87  | 9.08  | 11.22 | 8.98                  | 4.41  | 10.23 | 12.23 |
| ddIEC                | ENF    | LPV/rb | 2.56               | 2.07 | 6.97 | 2.94               | 6.99 | 6.98 | 6.99  | 4.63               | 9.53  | 9.04  | 11.60 | 4.33                  | 8.88  | 8.21  | 10.24 |
| 3TCb                 | EVG/c  | ATV/r  | 2.30               | 1.41 | 7.44 | 2.35               | 7.44 | 7.44 | 7.44  | 3.72               | 9.75  | 8.86  | 11.16 | 4.06                  | 8.37  | 9.57  | 11.30 |
| ddlB                 | NVP    | LPV/rq | 0.75               | 4.43 | 6.64 | 4.45               | 6.64 | 6.80 | 6.80  | 5.18               | 7.39  | 11.07 | 11.82 | 5.05                  | 7.20  | 10.51 | 10.91 |
| ABCb                 | NVP    | ATV    | 1.91               | 4.43 | 5.97 | 4.44               | 5.97 | 6.31 | 6.31  | 6.35               | 7.88  | 10.40 | 12.31 | 5.63                  | 7.02  | 8.91  | 9.94  |
| ENF                  | RAL    | ATV/r  | 2.07               | 1.69 | 7.44 | 2.29               | 7.44 | 7.44 | 7.44  | 3.76               | 9.51  | 9.13  | 11.20 | 3.96                  | 9.12  | 10.00 | 11.85 |
| 3TCq                 | EVG/c  | ATV/r  | 2.35               | 1.41 | 7.44 | 2.39               | 7.44 | 7.44 | 7.44  | 3.76               | 9.79  | 8.86  | 11.21 | 4.10                  | 8.39  | 9.57  | 11.35 |
| FTC                  | ABCb   | LPV/rb | 2.79               | 1.91 | 6.97 | 2.86               | 6.97 | 6.97 | 6.97  | 4.70               | 9.76  | 8.89  | 11.68 | 2.92                  | 8.72  | 8.00  | 9.33  |
| FTC                  | ddIEC  | LPV/rq | 2.79               | 2.56 | 6.64 | 3.19               | 6.64 | 6.66 | 6.66  | 5.35               | 9.43  | 9.20  | 11.99 | 3.86                  | 8.38  | 8.55  | 9.94  |
| ddIEC                | ABCq   | LPV/r  | 2.56               | 2.14 | 6.97 | 2.82               | 6.99 | 6.97 | 6.99  | 4.70               | 9.53  | 9.12  | 11.68 | 3.21                  | 8.88  | 8.13  | 9.69  |
| ddIEC                | EFV    | EVG/c  | 2.56               | 7.35 | 1.41 | 7.36               | 2.60 | 7.35 | 7.36  | 9.91               | 3.97  | 8.77  | 11.33 | 8.77                  | 4.20  | 8.86  | 10.85 |
| ABCb                 | EFV    | ENF    | 1.91               | 7.35 | 2.07 | 7.35               | 2.41 | 7.35 | 7.35  | 9.27               | 3.98  | 9.42  | 11.34 | 8.81                  | 3.61  | 9.20  | 10.61 |
| 3TCb                 | EFV    | RAL    | 2.30               | 7.35 | 1.69 | 7.35               | 2.39 | 7.35 | 7.35  | 9.66               | 3.99  | 9.04  | 11.35 | 8.38                  | 4.00  | 9.55  | 11.03 |
| ddlq                 | NVP    | LPV/rq | 0.84               | 4.43 | 6.64 | 4.46               | 6.64 | 6.80 | 6.80  | 5.27               | 7.48  | 11.07 | 11.91 | 5.12                  | 7.26  | 10.51 | 10.98 |
| ABCq                 | RAL    | ATV/r  | 2.14               | 1.69 | 7.44 | 2.26               | 7.44 | 7.44 | 7.44  | 3.83               | 9.59  | 9.13  | 11.27 | 3.68                  | 8.62  | 10.00 | 11.43 |
| TDF                  | NVP    | LPV/rq | 0.86               | 4.43 | 6.64 | 4.43               | 6.64 | 6.80 | 6.80  | 5.29               | 7.50  | 11.07 | 11.93 | 5.32                  | 7.07  | 10.51 | 10.87 |
| 3TCb                 | EFV    | MVC    | 2.30               | 7.35 | 1.72 | 7.35               | 2.36 | 7.35 | 7.35  | 9.66               | 4.03  | 9.08  | 11.38 | 8.38                  | 5.28  | 10.23 | 12.42 |
| d4T                  | NVP    | LPV/rb | 0.25               | 4.43 | 6.97 | 4.43               | 6.97 | 7.09 | 7.09  | 4.68               | 7.22  | 11.41 | 11.66 | 4.90                  | 7.13  | 10.84 | 11.70 |
| 3TCq                 | EFV    | RAL    | 2.35               | 7.35 | 1.69 | 7.35               | 2.44 | 7.35 | 7.35  | 9.70               | 4.04  | 9.04  | 11.39 | 8.40                  | 4.04  | 9.55  | 11.07 |
| 3TCq                 | EFV    | MVC    | 2.35               | 7.35 | 1.72 | 7.35               | 2.41 | 7.35 | 7.35  | 9.70               | 4.07  | 9.08  | 11.43 | 8.40                  | 5.32  | 10.23 | 12.48 |
| NVP                  | ENF    | ATV    | 4.43               | 2.07 | 5.97 | 4.47               | 6.31 | 5.98 | 6.32  | 6.50               | 10.40 | 8.04  | 12.47 | 6.17                  | 8.91  | 7.65  | 10.92 |
| FTC                  | ENF    | LPV/rb | 2.79               | 2.07 | 6.97 | 2.99               | 6.97 | 6.98 | 6.98  | 4.86               | 9.76  | 9.04  | 11.83 | 4.39                  | 8.72  | 8.21  | 10.08 |
| 3TCb                 | ddIEC  | LPV/rb | 2.30               | 2.56 | 6.97 | 2.91               | 6.97 | 6.99 | 6.99  | 4.86               | 9.28  | 9.53  | 11.84 | 3.38                  | 8.10  | 8.88  | 9.70  |
| ABCq                 | NVP    | ATV    | 2.14               | 4.43 | 5.97 | 4.44               | 5.97 | 6.31 | 6.31  | 6.58               | 8.11  | 10.40 | 12.54 | 5.77                  | 7.14  | 8.91  | 10.08 |
| AZTb                 | NVP    | LPV/rb | 0.37               | 4.43 | 6.97 | 4.43               | 6.97 | 7.09 | 7.09  | 4.80               | 7.34  | 11.41 | 11.77 | 5.28                  | 7.47  | 10.84 | 13.39 |
| ABCb                 | ENF    | ATV/r  | 1.91               | 2.07 | 7.44 | 2.41               | 7.44 | 7.44 | 7.44  | 3.98               | 9.36  | 9.51  | 11.43 | 3.62                  | 8.49  | 9.12  | 10.23 |
| ddIEC                | EVG/c  | ATV/r  | 2.56               | 1.41 | 7.44 | 2.60               | 7.45 | 7.44 | 7.45  | 3.97               | 10.00 | 8.86  | 11.42 | 4.20                  | 9.27  | 9.57  | 11.91 |
| 3TCq                 | ddIEC  | LPV/rb | 2.35               | 2.56 | 6.97 | 2.92               | 6.97 | 6.99 | 6.99  | 4.91               | 9.32  | 9.53  | 11.88 | 3.40                  | 8.12  | 8.88  | 9.72  |
| 3TCb                 | RAL    | ATV/r  | 2.30               | 1.69 | 7.44 | 2.39               | 7.44 | 7.44 | 7.44  | 3.99               | 9.75  | 9.13  | 11.43 | 4.00                  | 8.37  | 10.00 | 11.47 |
| FTC                  | ABCq   | LPV/rb | 2.79               | 2.14 | 6.97 | 2.90               | 6.97 | 6.97 | 6.97  | 4.93               | 9.76  | 9.12  | 11.91 | 2.97                  | 8.72  | 8.13  | 9.44  |
| AZTt                 | NVP    | LPV/rb | 0.39               | 4.43 | 6.97 | 4.43               | 6.97 | 7.09 | 7.09  | 4.83               | 7.37  | 11.41 | 11.80 | 5.33                  | 7.51  | 10.84 | 13.44 |
| FTC                  | EFV    | EVG/c  | 2.79               | 7.35 | 1.41 | 7.35               | 2.80 | 7.35 | 7.35  | 10.14              | 4.20  | 8.77  | 11.56 | 8.63                  | 4.28  | 8.86  | 10.82 |
| EFV                  | EVG/c  | NFVt   | 7.35               | 1.41 | 2.76 | 7.35               | 7.39 | 2.82 | 7.39  | 8.77               | 10.11 | 4.17  | 11.52 | 8.86                  | 10.85 | 4.61  | 12.38 |
| ABCq                 | EFV    | ENF    | 2.14               | 7.35 | 2.07 | 7.35               | 2.53 | 7.35 | 7.35  | 9.50               | 4.21  | 9.42  | 11.57 | 8.98                  | 3.82  | 9.20  | 10.79 |
| 3TCq                 | RAL    | ATV/r  | 2.35               | 1.69 | 7.44 | 2.44               | 7.44 | 7.44 | 7.44  | 4.04               | 9.79  | 9.13  | 11.48 | 4.04                  | 8.39  | 10.00 | 11.51 |
| 3TCb                 | ABCb   | EFV    | 2.30               | 1.91 | 7.35 | 2.47               | 7.35 | 7.35 | 7.35  | 4.22               | 9.66  | 9.27  | 11.57 | 2.82                  | 8.38  | 8.81  | 9.67  |
| ddIEC                | EFV    | RAL    | 2.56               | 7.35 | 1.69 | 7.36               | 2.66 | 7.35 | 7.36  | 9.91               | 4.25  | 9.04  | 11.60 | 8.77                  | 4.11  | 9.55  | 11.34 |
| EFV                  | EVG/c  | NFVb   | 7.35               | 1.41 | 2.80 | 7.35               | 7.40 | 2.88 | 7.40  | 8.77               | 10.15 | 4.22  | 11.57 | 8.86                  | 10.90 | 4.65  | 12.43 |
| 3TCq                 | ABCb   | EFV    | 2.35               | 1.91 | 7.35 | 2.51               | 7.35 | 7.35 | 7.35  | 4.26               | 9.70  | 9.27  | 11.62 | 2.86                  | 8.40  | 8.81  | 9.69  |
| ddIEC                | EFV    | MVC    | 2.56               | 7.35 | 1.72 | 7.36               | 2.62 | 7.35 | 7.36  | 9.91               | 4.28  | 9.08  | 11.64 | 8.77                  | 4.48  | 10.23 | 12.26 |
| 3TCb                 | NVP    | ATV    | 2.30               | 4.43 | 5.97 | 4.45               | 5.97 | 6.31 | 6.31  | 6.74               | 8.27  | 10.40 | 12.70 | 5.71                  | 6.90  | 8.91  | 9.76  |
| 3TCq                 | NVP    | ATV    | 2.35               | 4.43 | 5.97 | 4.45               | 5.97 | 6.31 | 6.31  | 6.78               | 8.32  | 10.40 | 12.75 | 5.74                  | 6.92  | 8.91  | 9.78  |
| 3TCb                 | EFV    | ENF    | 2.30               | 7.35 | 2.07 | 7.35               | 2.63 | 7.35 | 7.35  | 9.66               | 4.37  | 9.42  | 11.73 | 8.38                  | 4.55  | 9.20  | 10.71 |
| FTC                  | EVG/c  | ATV/r  | 2.79               | 1.41 | 7.44 | 2.80               | 7.44 | 7.44 | 7.44  | 4.20               | 10.23 | 8.86  | 11.65 | 4.28                  | 9.00  | 9.57  | 11.85 |
| ABCq                 | ENF    | ATV/r  | 2.14               | 2.07 | 7.44 | 2.53               | 7.44 | 7.44 | 7.44  | 4.21               | 9.59  | 9.51  | 11.66 | 3.82                  | 8.62  | 9.12  | 10.38 |
| 3TCb                 | ABCb   | ATV/r  | 2.30               | 1.91 | 7.44 | 2.47               | 7.44 | 7.44 | 7.44  | 4.22               | 9.75  | 9.36  | 11.66 | 2.82                  | 8.37  | 8.49  | 9.29  |
| 3TCq                 | EFV    | ENF    | 2.35               | 7.35 | 2.07 | 7.35               | 2.67 | 7.35 | 7.35  | 9.70               | 4.42  | 9.42  | 11.77 | 8.40                  | 4.60  | 9.20  | 10.75 |
| ddIEC                | RAL    | ATV/r  | 2.56               | 1.69 | 7.44 | 2.66               | 7.45 | 7.44 | 7.45  | 4.25               | 10.00 | 9.13  | 11.69 | 4.11                  | 9.27  | 10.00 | 12.08 |
| 3TCq                 | ABCb   | ATV/r  | 2.35               | 1.91 | 7.44 | 2.51               | 7.44 | 7.44 | 7.44  | 4.26               | 9.79  | 9.36  | 11.71 | 2.86                  | 8.39  | 8.49  | 9.30  |
| 3TCb                 | ABCq   | EFV    | 2.30               | 2.14 | 7.35 | 2.56               | 7.35 | 7.35 | 7.35  | 4.45               | 9.66  | 9.50  | 11.80 | 2.93                  | 8.38  | 8.98  | 9.80  |
| FTC                  | EFV    | RAL    | 2.79               | 7.35 | 1.69 | 7.35               | 2.82 | 7.35 | 7.35  | 10.14              | 4.48  | 9.04  | 11.83 | 8.63                  | 4.61  | 9.55  | 11.56 |
| ddIEC                | ABCb   | EFV    | 2.56               | 1.91 | 7.35 | 2.74               | 7.36 | 7.35 | 7.36  | 4.47               | 9.91  | 9.27  | 11.83 | 3.11                  | 8.77  | 8.81  | 10.00 |
| EFV                  | RAL    | NFVt   | 7.35               | 1.69 | 2.76 | 7.35               | 7.39 | 2.87 | 7.39  | 9.04               | 10.11 | 4.44  | 11.80 | 9.55                  | 10.85 | 5.85  | 13.66 |
| 3TCq                 | ABCq   | EFV    | 2.35               | 2.14 | 7.35 | 2.59               | 7.35 | 7.35 | 7.35  | 4.49               | 9.70  | 9.50  | 11.85 | 2.96                  | 8.40  | 8.98  | 9.82  |
| FTC                  | EFV    | MVC    | 2.79               | 7.35 | 1.72 | 7.35               | 2.80 | 7.35 | 7.35  | 10.14              | 4.51  | 9.08  | 11.87 | 8.63                  | 4.79  | 10.23 | 12.43 |
| EFV                  | RAL    | NFVb   | 7.35               | 1.69 | 2.80 | 7.35               | 7.40 | 2.93 | 7.40  | 9.04               | 10.15 | 4.49  | 11.84 | 9.55                  | 10.90 | 5.88  | 13.73 |
| ddlB                 | NVP    | LPV/rb | 0.75               | 4.43 | 6.97 | 4.45               | 6.98 | 7.09 | 7.09  | 5.18               | 7.72  | 11.41 | 12.15 | 5.05                  | 7.53  | 10.84 | 11.23 |
| 3TCb                 | ENF    | ATV/r  | 2.30               | 2.07 | 7.44 | 2.63               | 7.44 | 7.44 | 7.44  | 4.37               | 9.75  | 9.51  | 11.82 | 4.55                  | 8.37  | 9.12  | 10.58 |
| NVP                  | EVG/c  | LPV/rq | 4.43               | 1.41 | 6.64 | 4.43               | 6.80 | 6.64 | 6.80  | 5.85               | 11.07 | 8.05  | 12.49 | 7.01                  | 10.51 | 8.86  | 14.52 |
| 3TCq                 | ENF    | ATV/r  | 2.35               | 2.07 | 7.44 | 2.67               | 7.44 | 7.44 | 7.44  | 4.42               | 9.79  | 9.51  | 11.86 | 4.60                  | 8.39  | 9.12  | 10.61 |

| Regimen <sup>a</sup> |        |        | HIV <sup>ave</sup> |      |      |                    |      |      |       |                    |       |       |       |                       |       |       |       |
|----------------------|--------|--------|--------------------|------|------|--------------------|------|------|-------|--------------------|-------|-------|-------|-----------------------|-------|-------|-------|
|                      |        |        | Single drug        |      |      | Loewe <sup>b</sup> |      |      |       | Bliss <sup>c</sup> |       |       |       | DI Index <sup>d</sup> |       |       |       |
| Drug 1               | Drug 2 | Drug 3 | 1                  | 2    | 3    | 1,2                | 1,3  | 2,3  | 1,2,3 | 1,2                | 1,3   | 2,3   | 1,2,3 | 1,2                   | 1,3   | 2,3   | 1,2,3 |
| ddIEC                | NVP    | ATV    | 2.56               | 4.43 | 5.97 | 4.57               | 6.03 | 6.31 | 6.35  | 6.99               | 8.53  | 10.40 | 12.96 | 6.55                  | 7.81  | 8.91  | 11.06 |
| FTC                  | ddIEC  | LPV/rb | 2.79               | 2.56 | 6.97 | 3.19               | 6.97 | 6.99 | 6.99  | 5.35               | 9.76  | 9.53  | 12.32 | 3.86                  | 8.72  | 8.88  | 10.28 |
| 3TCb                 | ABCq   | ATV/r  | 2.30               | 2.14 | 7.44 | 2.56               | 7.44 | 7.44 | 7.44  | 4.45               | 9.75  | 9.59  | 11.89 | 2.93                  | 8.37  | 8.62  | 9.38  |
| ddlq                 | NVP    | LPV/rb | 0.84               | 4.43 | 6.97 | 4.46               | 6.98 | 7.09 | 7.09  | 5.27               | 7.81  | 11.41 | 12.24 | 5.12                  | 7.60  | 10.84 | 11.30 |
| ddIEC                | EFV    | ENF    | 2.56               | 7.35 | 2.07 | 7.36               | 2.94 | 7.35 | 7.36  | 9.91               | 4.63  | 9.42  | 11.98 | 8.77                  | 4.33  | 9.20  | 10.81 |
| TDF                  | NVP    | LPV/rb | 0.86               | 4.43 | 6.97 | 4.43               | 6.97 | 7.09 | 7.09  | 5.29               | 7.83  | 11.41 | 12.27 | 5.32                  | 7.41  | 10.84 | 11.18 |
| FTC                  | RAL    | ATV/r  | 2.79               | 1.69 | 7.44 | 2.82               | 7.44 | 7.44 | 7.44  | 4.48               | 10.23 | 9.13  | 11.92 | 4.61                  | 9.00  | 10.00 | 12.22 |
| ddIEC                | ABCb   | ATV/r  | 2.56               | 1.91 | 7.44 | 2.74               | 7.45 | 7.44 | 7.45  | 4.47               | 10.00 | 9.36  | 11.92 | 3.11                  | 9.27  | 8.49  | 10.00 |
| 3TCq                 | ABCq   | ATV/r  | 2.35               | 2.14 | 7.44 | 2.59               | 7.44 | 7.44 | 7.44  | 4.49               | 9.79  | 9.59  | 11.93 | 2.96                  | 8.39  | 8.62  | 9.40  |
| FTC                  | ABCb   | EFV    | 2.79               | 1.91 | 7.35 | 2.86               | 7.35 | 7.35 | 7.35  | 4.70               | 10.14 | 9.27  | 12.06 | 2.92                  | 8.63  | 8.81  | 9.84  |
| ddIEC                | ABCq   | EFV    | 2.56               | 2.14 | 7.35 | 2.82               | 7.36 | 7.35 | 7.36  | 4.70               | 9.91  | 9.50  | 12.06 | 3.21                  | 8.77  | 8.98  | 10.13 |
| ABCb                 | EFV    | NFVt   | 1.91               | 7.35 | 2.76 | 7.35               | 2.96 | 7.39 | 7.39  | 9.27               | 4.67  | 10.11 | 12.02 | 8.81                  | 4.36  | 10.85 | 12.04 |
| ABCb                 | EFV    | NFVb   | 1.91               | 7.35 | 2.80 | 7.35               | 3.03 | 7.40 | 7.40  | 9.27               | 4.72  | 10.15 | 12.07 | 8.81                  | 4.41  | 10.90 | 12.08 |
| FTC                  | NVP    | ATV    | 2.79               | 4.43 | 5.97 | 4.48               | 5.98 | 6.31 | 6.32  | 7.22               | 8.76  | 10.40 | 13.19 | 6.21                  | 7.53  | 8.91  | 10.50 |
| ddIEC                | ENF    | ATV/r  | 2.56               | 2.07 | 7.44 | 2.94               | 7.45 | 7.44 | 7.46  | 4.63               | 10.00 | 9.51  | 12.07 | 4.33                  | 9.27  | 9.12  | 11.03 |
| NVP                  | RAL    | LPV/rq | 4.43               | 1.69 | 6.64 | 4.43               | 6.80 | 6.64 | 6.80  | 6.12               | 11.07 | 8.33  | 12.76 | 6.36                  | 10.51 | 8.86  | 13.31 |
| FTC                  | EFV    | ENF    | 2.79               | 7.35 | 2.07 | 7.35               | 2.99 | 7.35 | 7.35  | 10.14              | 4.86  | 9.42  | 12.21 | 8.63                  | 4.39  | 9.20  | 10.73 |
| EFV                  | ENF    | NFVt   | 7.35               | 2.07 | 2.76 | 7.35               | 7.39 | 3.16 | 7.39  | 9.42               | 10.11 | 4.83  | 12.18 | 9.20                  | 10.85 | 5.11  | 12.72 |
| 3TCb                 | ddIEC  | EFV    | 2.30               | 2.56 | 7.35 | 2.91               | 7.35 | 7.36 | 7.36  | 4.86               | 9.66  | 9.91  | 12.22 | 3.38                  | 8.38  | 8.77  | 9.58  |
| FTC                  | ABCb   | ATV/r  | 2.79               | 1.91 | 7.44 | 2.86               | 7.44 | 7.44 | 7.44  | 4.70               | 10.23 | 9.36  | 12.15 | 2.92                  | 9.00  | 8.49  | 9.70  |
| NVP                  | LPV/rq | MVC    | 4.43               | 6.64 | 1.72 | 6.80               | 4.43 | 6.64 | 6.80  | 11.07              | 6.16  | 8.36  | 12.80 | 10.51                 | 7.26  | 6.64  | 11.97 |
| ddIEC                | ABCq   | ATV/r  | 2.56               | 2.14 | 7.44 | 2.82               | 7.45 | 7.44 | 7.45  | 4.70               | 10.00 | 9.59  | 12.15 | 3.21                  | 9.27  | 8.62  | 10.13 |
| EFV                  | ENF    | NFVb   | 7.35               | 2.07 | 2.80 | 7.35               | 7.40 | 3.15 | 7.40  | 9.42               | 10.15 | 4.87  | 12.23 | 9.20                  | 10.90 | 5.17  | 12.77 |
| 3TCq                 | ddIEC  | EFV    | 2.35               | 2.56 | 7.35 | 2.92               | 7.35 | 7.36 | 7.36  | 4.91               | 9.70  | 9.91  | 12.26 | 3.40                  | 8.40  | 8.77  | 9.60  |
| FTC                  | ABCq   | EFV    | 2.79               | 2.14 | 7.35 | 2.90               | 7.35 | 7.35 | 7.35  | 4.93               | 10.14 | 9.50  | 12.29 | 2.97                  | 8.63  | 8.98  | 9.97  |
| ABCq                 | EFV    | NFVt   | 2.14               | 7.35 | 2.76 | 7.35               | 3.04 | 7.39 | 7.39  | 9.50               | 4.90  | 10.11 | 12.25 | 8.98                  | 4.56  | 10.85 | 12.25 |
| d4T                  | NVP    | ATV/r  | 0.25               | 4.43 | 7.44 | 4.43               | 7.44 | 7.53 | 7.53  | 4.68               | 7.69  | 11.88 | 12.12 | 4.90                  | 7.53  | 10.29 | 11.25 |
| ABCq                 | EFV    | NFVb   | 2.14               | 7.35 | 2.80 | 7.35               | 3.10 | 7.40 | 7.40  | 9.50               | 4.94  | 10.15 | 12.30 | 8.98                  | 4.61  | 10.90 | 12.30 |
| d4T                  | ETR    | ATV    | 0.25               | 6.31 | 5.97 | 6.30               | 5.97 | 7.22 | 7.22  | 6.55               | 6.22  | 12.27 | 12.52 | 6.75                  | 6.06  | 11.14 | 12.29 |
| FTC                  | ENF    | ATV/r  | 2.79               | 2.07 | 7.44 | 2.99               | 7.44 | 7.44 | 7.44  | 4.86               | 10.23 | 9.51  | 12.30 | 4.39                  | 9.00  | 9.12  | 10.83 |
| 3TCb                 | ddIEC  | ATV/r  | 2.30               | 2.56 | 7.44 | 2.91               | 7.44 | 7.45 | 7.45  | 4.86               | 9.75  | 10.00 | 12.31 | 3.38                  | 8.37  | 9.27  | 9.95  |
| AZTb                 | NVP    | ATV/r  | 0.37               | 4.43 | 7.44 | 4.43               | 7.44 | 7.53 | 7.53  | 4.80               | 7.81  | 11.88 | 12.24 | 5.28                  | 7.57  | 10.29 | 11.86 |
| ABCb                 | NVP    | LPV/rq | 1.91               | 4.43 | 6.64 | 4.44               | 6.64 | 6.80 | 6.80  | 6.35               | 8.55  | 11.07 | 12.99 | 5.63                  | 7.67  | 10.51 | 11.16 |
| AZTt                 | NVP    | ATV/r  | 0.39               | 4.43 | 7.44 | 4.43               | 7.44 | 7.53 | 7.53  | 4.83               | 7.84  | 11.88 | 12.27 | 5.33                  | 7.58  | 10.29 | 11.90 |
| 3TCq                 | ddIEC  | ATV/r  | 2.35               | 2.56 | 7.44 | 2.92               | 7.44 | 7.45 | 7.45  | 4.91               | 9.79  | 10.00 | 12.35 | 3.40                  | 8.39  | 9.27  | 9.97  |
| 3TCb                 | EFV    | NFVt   | 2.30               | 7.35 | 2.76 | 7.35               | 3.12 | 7.39 | 7.39  | 9.66               | 5.06  | 10.11 | 12.41 | 8.38                  | 4.32  | 10.85 | 11.70 |
| FTC                  | ABCq   | ATV/r  | 2.79               | 2.14 | 7.44 | 2.90               | 7.44 | 7.44 | 7.44  | 4.93               | 10.23 | 9.59  | 12.38 | 2.97                  | 9.00  | 8.62  | 9.81  |
| 3TCq                 | EFV    | NFVt   | 2.35               | 7.35 | 2.76 | 7.35               | 3.14 | 7.39 | 7.39  | 9.70               | 5.11  | 10.11 | 12.46 | 8.40                  | 4.35  | 10.85 | 11.74 |
| 3TCb                 | EFV    | NFVb   | 2.30               | 7.35 | 2.80 | 7.35               | 3.17 | 7.40 | 7.40  | 9.66               | 5.11  | 10.15 | 12.46 | 8.38                  | 4.36  | 10.90 | 11.75 |
| AZTb                 | ETR    | ATV    | 0.37               | 6.31 | 5.97 | 6.30               | 5.97 | 7.22 | 7.22  | 6.67               | 6.33  | 12.27 | 12.64 | 7.69                  | 6.09  | 11.14 | 15.81 |
| AZTt                 | ETR    | ATV    | 0.39               | 6.31 | 5.97 | 6.30               | 5.97 | 7.22 | 7.22  | 6.70               | 6.36  | 12.27 | 12.66 | 7.78                  | 6.10  | 11.14 | 15.89 |
| 3TCq                 | EFV    | NFVb   | 2.35               | 7.35 | 2.80 | 7.35               | 3.20 | 7.40 | 7.40  | 9.70               | 5.15  | 10.15 | 12.50 | 8.40                  | 4.40  | 10.90 | 11.78 |
| NVP                  | EVG/c  | LPV/rb | 4.43               | 1.41 | 6.97 | 4.43               | 7.09 | 6.97 | 7.09  | 5.85               | 11.41 | 8.39  | 12.82 | 7.01                  | 10.84 | 9.19  | 14.85 |
| NVP                  | ENF    | LPV/rq | 4.43               | 2.07 | 6.64 | 4.47               | 6.80 | 6.64 | 6.80  | 6.50               | 11.07 | 8.71  | 13.14 | 6.17                  | 10.51 | 7.88  | 11.71 |
| ABCq                 | NVP    | LPV/rq | 2.14               | 4.43 | 6.64 | 4.44               | 6.64 | 6.80 | 6.80  | 6.58               | 8.78  | 11.07 | 13.22 | 5.77                  | 7.79  | 10.51 | 11.31 |
| FTC                  | ddIEC  | EFV    | 2.79               | 2.56 | 7.35 | 3.19               | 7.35 | 7.36 | 7.36  | 5.35               | 10.14 | 9.91  | 12.70 | 3.86                  | 8.63  | 8.77  | 9.88  |
| ddIEC                | EFV    | NFVt   | 2.56               | 7.35 | 2.76 | 7.36               | 3.48 | 7.39 | 7.40  | 9.91               | 5.32  | 10.11 | 12.67 | 8.77                  | 4.64  | 10.85 | 12.09 |
| ddIEC                | EFV    | NFVb   | 2.56               | 7.35 | 2.80 | 7.36               | 3.53 | 7.40 | 7.41  | 9.91               | 5.36  | 10.15 | 12.71 | 8.77                  | 4.69  | 10.90 | 12.13 |
| ddlq                 | NVP    | ATV/r  | 0.75               | 4.43 | 7.44 | 4.45               | 7.44 | 7.53 | 7.53  | 5.18               | 8.19  | 11.88 | 12.62 | 5.05                  | 7.97  | 10.29 | 11.10 |
| 3TCb                 | NVP    | LPV/rq | 2.30               | 4.43 | 6.64 | 4.45               | 6.64 | 6.80 | 6.80  | 6.74               | 8.94  | 11.07 | 13.38 | 5.71                  | 7.77  | 10.51 | 11.21 |
| NVP                  | RAL    | LPV/rb | 4.43               | 1.69 | 6.97 | 4.43               | 7.09 | 6.97 | 7.09  | 6.12               | 11.41 | 8.66  | 13.09 | 6.36                  | 10.84 | 9.20  | 13.65 |
| 3TCq                 | NVP    | LPV/rq | 2.35               | 4.43 | 6.64 | 4.45               | 6.64 | 6.80 | 6.80  | 6.78               | 8.99  | 11.07 | 13.42 | 5.74                  | 7.79  | 10.51 | 11.24 |
| ddlq                 | ETR    | ATV    | 0.75               | 6.31 | 5.97 | 6.31               | 5.98 | 7.22 | 7.23  | 7.05               | 6.71  | 12.27 | 13.02 | 6.28                  | 6.50  | 11.14 | 10.39 |
| FTC                  | ddIEC  | ATV/r  | 2.79               | 2.56 | 7.44 | 3.19               | 7.44 | 7.45 | 7.46  | 5.35               | 10.23 | 10.00 | 12.79 | 3.86                  | 9.00  | 9.27  | 10.55 |
| ddlq                 | NVP    | ATV/r  | 0.84               | 4.43 | 7.44 | 4.46               | 7.44 | 7.53 | 7.53  | 5.27               | 8.28  | 11.88 | 12.71 | 5.12                  | 8.04  | 10.29 | 11.17 |
| TDF                  | NVP    | ATV/r  | 0.86               | 4.43 | 7.44 | 4.43               | 7.44 | 7.53 | 7.53  | 5.29               | 8.30  | 11.88 | 12.73 | 5.32                  | 7.80  | 10.29 | 10.92 |
| FTC                  | EFV    | NFVt   | 2.79               | 7.35 | 2.76 | 7.35               | 3.38 | 7.39 | 7.39  | 10.14              | 5.55  | 10.11 | 12.90 | 8.63                  | 4.99  | 10.85 | 12.22 |
| ddlq                 | ETR    | ATV    | 0.84               | 6.31 | 5.97 | 6.31               | 5.98 | 7.22 | 7.23  | 7.14               | 6.80  | 12.27 | 13.11 | 6.28                  | 6.57  | 11.14 | 10.45 |
| FTC                  | EFV    | NFVb   | 2.79               | 7.35 | 2.80 | 7.35               | 3.44 | 7.40 | 7.40  | 10.14              | 5.59  | 10.15 | 12.94 | 8.63                  | 5.04  | 10.90 | 12.27 |
| TDF                  | ETR    | ATV    | 0.86               | 6.31 | 5.97 | 6.30               | 5.97 | 7.22 | 7.22  | 7.16               | 6.83  | 12.27 | 13.13 | 6.44                  | 6.32  | 11.14 | 10.27 |
| ABCb                 | NVP    | LPV/rb | 1.91               | 4.43 | 6.97 | 4.44               | 6.97 | 7.09 | 7.09  | 6.35               | 8.89  | 11.41 | 13.32 | 5.63                  | 8.00  | 10.84 | 11.48 |
| ddIEC                | NVP    | LPV/rq | 2.56               | 4.43 | 6.64 | 4.57               | 6.66 | 6.80 | 6.82  | 6.99               | 9.20  | 11.07 | 13.63 | 6.55                  | 8.55  | 10.51 | 12.37 |
| NVP                  | ENF    | LPV/rb | 4.43               | 2.07 | 6.97 | 4.47               | 7.09 | 6.98 | 7.09  | 6.50               | 11.41 | 9.04  | 13.48 | 6.17                  | 10.84 | 8.21  | 12.02 |
| ABCq                 | NVP    | LPV/rb | 2.14               | 4.43 | 6.97 | 4.44               | 6.97 | 7.09 | 7.09  | 6.58               | 9.12  | 11.41 | 13.55 | 5.77                  | 8.13  | 10.84 | 11.63 |
| d4T                  | ETR    | LPV/rq | 0.25               | 6.31 | 6.64 | 6.30               | 6.64 | 7.45 | 7.45  | 6.55               | 6.89  | 12.94 | 13.19 | 6.75                  | 6.80  | 11.95 | 13.36 |
| FTC                  | NVP    | LPV/rq | 2.79               | 4.43 | 6.64 | 4.48               | 6.64 | 6.80 | 6.80  | 7.22               | 9.43  | 11.07 | 13.86 | 6.21                  | 8.38  | 10.51 | 11.95 |
| AZTb                 | ETR    | LPV/rq | 0.37               | 6.31 | 6.64 | 6.30               | 6.64 | 7.45 | 7.45  | 6.67               | 7.01  | 12.94 | 13.31 | 7.69                  | 7.14  | 11.95 | 18.04 |
| AZTt                 | ETR    | LPV/rq | 0.39               | 6.31 | 6.64 | 6.30               | 6.64 | 7.45 | 7.45  | 6.70               | 7.03  | 12.94 | 13.34 | 7.78                  | 7.17  | 11.95 | 18.12 |
| 3TCb                 | NVP    | LPV/rb | 2.30               | 4.43 | 6.97 | 4.45               | 6.97 | 7.09 | 7.09  | 6.74               | 9.28  | 11.41 | 13.71 | 5.71                  | 8.10  | 10.84 | 11.53 |
| NVP                  | EVG/c  | ATV/r  | 4.43               | 1.41 | 7.44 | 4.43               | 7.53 | 7.44 | 7.53  | 5.85               | 11.88 | 8.86  | 13.29 | 7.01                  | 10.29 | 9.57  | 14.75 |

| Regimen <sup>a</sup> |        |        | HIV <sup>ave</sup> |      |       |                    |       |       |       |                    |       |       |       |                       |       |       |       |
|----------------------|--------|--------|--------------------|------|-------|--------------------|-------|-------|-------|--------------------|-------|-------|-------|-----------------------|-------|-------|-------|
|                      |        |        | Single drug        |      |       | Loewe <sup>b</sup> |       |       |       | Bliss <sup>c</sup> |       |       |       | DI Index <sup>d</sup> |       |       |       |
| Drug 1               | Drug 2 | Drug 3 | 1                  | 2    | 3     | 1,2                | 1,3   | 2,3   | 1,2,3 | 1,2                | 1,3   | 2,3   | 1,2,3 | 1,2                   | 1,3   | 2,3   | 1,2,3 |
| 3TCq                 | NVP    | LPV/rb | 2.35               | 4.43 | 6.97  | 4.45               | 6.97  | 7.09  | 7.09  | 6.78               | 9.32  | 11.41 | 13.76 | 5.74                  | 8.12  | 10.84 | 11.56 |
| ETR                  | EVG/c  | ATV    | 6.31               | 1.41 | 5.97  | 6.30               | 7.22  | 5.97  | 7.22  | 7.72               | 12.27 | 7.38  | 13.69 | 7.55                  | 11.14 | 8.10  | 13.86 |
| ddIEC                | NVP    | LPV/rb | 2.56               | 4.43 | 6.97  | 4.57               | 6.99  | 7.09  | 7.10  | 6.99               | 9.53  | 11.41 | 13.97 | 6.55                  | 8.88  | 10.84 | 12.69 |
| NVP                  | RAL    | ATV/r  | 4.43               | 1.69 | 7.44  | 4.43               | 7.53  | 7.44  | 7.53  | 6.12               | 11.88 | 9.13  | 13.56 | 6.36                  | 10.29 | 10.00 | 14.09 |
| ddlB                 | ETR    | LPV/rq | 0.75               | 6.31 | 6.64  | 6.31               | 6.64  | 7.45  | 7.45  | 7.05               | 7.39  | 12.94 | 13.69 | 6.28                  | 7.20  | 11.95 | 11.12 |
| d4T                  | ETR    | LPV/rb | 0.25               | 6.31 | 6.97  | 6.30               | 6.97  | 7.61  | 7.61  | 6.55               | 7.22  | 13.28 | 13.53 | 6.75                  | 7.13  | 12.26 | 13.66 |
| AZTb                 | d4T    | DRV/rq | 0.37               | 0.25 | 10.28 | 0.45               | 10.28 | 10.28 | 10.28 | 0.62               | 10.64 | 10.53 | 10.89 | 0.45                  | 10.51 | 10.50 | 10.74 |
| ETR                  | RAL    | ATV    | 6.31               | 1.69 | 5.97  | 6.30               | 7.22  | 5.97  | 7.22  | 7.99               | 12.27 | 7.65  | 13.96 | 7.73                  | 11.14 | 8.52  | 14.13 |
| AZTt                 | d4T    | DRV/rq | 0.39               | 0.25 | 10.28 | 0.47               | 10.28 | 10.28 | 10.28 | 0.64               | 10.67 | 10.53 | 10.92 | 0.47                  | 10.52 | 10.50 | 10.75 |
| ddlq                 | ETR    | LPV/rq | 0.84               | 6.31 | 6.64  | 6.31               | 6.64  | 7.45  | 7.45  | 7.14               | 7.48  | 12.94 | 13.78 | 6.28                  | 7.26  | 11.95 | 11.17 |
| TDF                  | ETR    | LPV/rq | 0.86               | 6.31 | 6.64  | 6.30               | 6.64  | 7.45  | 7.45  | 7.16               | 7.50  | 12.94 | 13.80 | 6.44                  | 7.07  | 11.95 | 11.04 |
| AZTb                 | ETR    | LPV/rb | 0.37               | 6.31 | 6.97  | 6.30               | 6.97  | 7.61  | 7.61  | 6.67               | 7.34  | 13.28 | 13.65 | 7.69                  | 7.47  | 12.26 | 18.41 |
| FTC                  | NVP    | LPV/rb | 2.79               | 4.43 | 6.97  | 4.48               | 6.97  | 7.09  | 7.09  | 7.22               | 9.76  | 11.41 | 14.20 | 6.21                  | 8.72  | 10.84 | 12.27 |
| AZTt                 | ETR    | LPV/rb | 0.39               | 6.31 | 6.97  | 6.30               | 6.97  | 7.61  | 7.61  | 6.70               | 7.37  | 13.28 | 13.67 | 7.78                  | 7.51  | 12.26 | 18.50 |
| ABCb                 | NVP    | ATV/r  | 1.91               | 4.43 | 7.44  | 4.44               | 7.44  | 7.53  | 7.53  | 6.35               | 9.36  | 11.88 | 13.79 | 5.63                  | 8.49  | 10.29 | 11.30 |
| d4T                  | EFV    | ATV    | 0.25               | 7.35 | 5.97  | 7.35               | 5.97  | 7.83  | 7.83  | 7.60               | 6.22  | 13.32 | 13.57 | 8.00                  | 6.06  | 11.89 | 14.86 |
| ABCb                 | ETR    | ATV    | 1.91               | 6.31 | 5.97  | 6.31               | 5.97  | 7.22  | 7.22  | 8.22               | 7.88  | 12.27 | 14.19 | 6.62                  | 7.02  | 11.14 | 11.04 |
| NVP                  | ENF    | ATV/r  | 4.43               | 2.07 | 7.44  | 4.47               | 7.53  | 7.44  | 7.53  | 6.50               | 11.88 | 9.51  | 13.95 | 6.17                  | 10.29 | 9.12  | 12.32 |
| AZTb                 | EFV    | ATV    | 0.37               | 7.35 | 5.97  | 7.35               | 5.97  | 7.83  | 7.83  | 7.72               | 6.33  | 13.32 | 13.69 | 8.91                  | 6.09  | 11.89 | 18.38 |
| AZTt                 | EFV    | ATV    | 0.39               | 7.35 | 5.97  | 7.35               | 5.97  | 7.83  | 7.83  | 7.75               | 6.36  | 13.32 | 13.71 | 9.02                  | 6.10  | 11.89 | 18.47 |
| d4T                  | ddlB   | DRV/rq | 0.25               | 0.75 | 10.28 | 0.82               | 10.28 | 10.28 | 10.28 | 0.99               | 10.53 | 11.02 | 11.27 | 1.34                  | 10.50 | 10.64 | 11.09 |
| ABCq                 | NVP    | ATV/r  | 2.14               | 4.43 | 7.44  | 4.44               | 7.44  | 7.53  | 7.53  | 6.58               | 9.59  | 11.88 | 14.02 | 5.77                  | 8.62  | 10.29 | 11.44 |
| ETR                  | ENF    | ATV    | 6.31               | 2.07 | 5.97  | 6.31               | 7.22  | 5.98  | 7.23  | 8.38               | 12.27 | 8.04  | 14.34 | 8.20                  | 11.14 | 7.65  | 13.12 |
| ABCq                 | ETR    | ATV    | 2.14               | 6.31 | 5.97  | 6.31               | 5.97  | 7.22  | 7.22  | 8.45               | 8.11  | 12.27 | 14.41 | 6.66                  | 7.14  | 11.14 | 11.17 |
| ddlB                 | ETR    | LPV/rb | 0.75               | 6.31 | 6.97  | 6.31               | 6.98  | 7.61  | 7.62  | 7.05               | 7.72  | 13.28 | 14.02 | 6.28                  | 7.53  | 12.26 | 11.41 |
| d4T                  | ddlq   | DRV/rq | 0.25               | 0.84 | 10.28 | 0.90               | 10.28 | 10.28 | 10.28 | 1.09               | 10.53 | 11.12 | 11.36 | 1.45                  | 10.50 | 10.68 | 11.18 |
| d4T                  | TDF    | DRV/rq | 0.25               | 0.86 | 10.28 | 0.87               | 10.28 | 10.28 | 10.28 | 1.11               | 10.53 | 11.14 | 11.39 | 1.67                  | 10.50 | 10.66 | 11.22 |
| AZTb                 | ddlB   | DRV/rq | 0.37               | 0.75 | 10.28 | 0.83               | 10.28 | 10.28 | 10.28 | 1.11               | 10.64 | 11.02 | 11.39 | 1.51                  | 10.51 | 10.64 | 11.03 |
| AZTt                 | ddlB   | DRV/rq | 0.39               | 0.75 | 10.28 | 0.84               | 10.28 | 10.28 | 10.28 | 1.14               | 10.67 | 11.02 | 11.42 | 1.55                  | 10.52 | 10.64 | 11.05 |
| 3TCb                 | NVP    | ATV/r  | 2.30               | 4.43 | 7.44  | 4.45               | 7.44  | 7.53  | 7.53  | 6.74               | 9.75  | 11.88 | 14.18 | 5.71                  | 8.37  | 10.29 | 11.10 |
| ddlq                 | ETR    | LPV/rb | 0.84               | 6.31 | 6.97  | 6.31               | 6.98  | 7.61  | 7.62  | 7.14               | 7.81  | 13.28 | 14.12 | 6.28                  | 7.60  | 12.26 | 11.47 |
| TDF                  | ETR    | LPV/rb | 0.86               | 6.31 | 6.97  | 6.30               | 6.97  | 7.61  | 7.61  | 7.16               | 7.83  | 13.28 | 14.14 | 6.44                  | 7.41  | 12.26 | 11.32 |
| 3TCq                 | NVP    | ATV/r  | 2.35               | 4.43 | 7.44  | 4.45               | 7.44  | 7.53  | 7.53  | 6.78               | 9.79  | 11.88 | 14.22 | 5.74                  | 8.39  | 10.29 | 11.12 |
| AZTb                 | ddlq   | DRV/rq | 0.37               | 0.84 | 10.28 | 0.91               | 10.28 | 10.28 | 10.28 | 1.21               | 10.64 | 11.12 | 11.48 | 1.61                  | 10.51 | 10.68 | 11.10 |
| AZTb                 | TDF    | DRV/rq | 0.37               | 0.86 | 10.28 | 0.87               | 10.28 | 10.28 | 10.28 | 1.23               | 10.64 | 11.14 | 11.50 | 1.92                  | 10.51 | 10.66 | 11.17 |
| AZTt                 | ddlq   | DRV/rq | 0.39               | 0.84 | 10.28 | 0.92               | 10.28 | 10.28 | 10.28 | 1.23               | 10.67 | 11.12 | 11.51 | 1.66                  | 10.52 | 10.68 | 11.12 |
| 3TCb                 | ETR    | ATV    | 2.30               | 6.31 | 5.97  | 6.31               | 5.97  | 7.22  | 7.22  | 8.61               | 8.27  | 12.27 | 14.58 | 6.86                  | 6.90  | 11.14 | 11.09 |
| AZTt                 | TDF    | DRV/rq | 0.39               | 0.86 | 10.28 | 0.87               | 10.28 | 10.28 | 10.28 | 1.25               | 10.67 | 11.14 | 11.53 | 1.99                  | 10.52 | 10.66 | 11.19 |
| ETR                  | EVG/c  | LPV/rq | 6.31               | 1.41 | 6.64  | 6.30               | 7.45  | 6.64  | 7.45  | 7.72               | 12.94 | 8.05  | 14.36 | 7.55                  | 11.95 | 8.86  | 14.84 |
| 3TCq                 | ETR    | ATV    | 2.35               | 6.31 | 5.97  | 6.31               | 5.97  | 7.22  | 7.22  | 8.65               | 8.32  | 12.27 | 14.62 | 6.87                  | 6.92  | 11.14 | 11.11 |
| ddlB                 | EFV    | ATV    | 0.75               | 7.35 | 5.97  | 7.35               | 5.98  | 7.83  | 7.83  | 8.10               | 6.71  | 13.32 | 14.07 | 7.77                  | 6.50  | 11.89 | 12.06 |
| ddIEC                | NVP    | ATV/r  | 2.56               | 4.43 | 7.44  | 4.57               | 7.45  | 7.53  | 7.54  | 6.99               | 10.00 | 11.88 | 14.44 | 6.55                  | 9.27  | 10.29 | 12.43 |
| ddlq                 | EFV    | ATV    | 0.84               | 7.35 | 5.97  | 7.36               | 5.98  | 7.83  | 7.83  | 8.19               | 6.80  | 13.32 | 14.16 | 7.82                  | 6.57  | 11.89 | 12.12 |
| d4T                  | ETR    | ATV/r  | 0.25               | 6.31 | 7.44  | 6.30               | 7.44  | 8.00  | 8.00  | 6.55               | 7.69  | 13.75 | 14.00 | 6.75                  | 7.53  | 12.46 | 13.50 |
| TDF                  | EFV    | ATV    | 0.86               | 7.35 | 5.97  | 7.35               | 5.97  | 7.83  | 7.83  | 8.21               | 6.83  | 13.32 | 14.18 | 7.97                  | 6.32  | 11.89 | 11.98 |
| ddIEC                | ETR    | ATV    | 2.56               | 6.31 | 5.97  | 6.33               | 6.03  | 7.22  | 7.24  | 8.87               | 8.53  | 12.27 | 14.83 | 6.24                  | 7.81  | 11.14 | 11.46 |
| ETR                  | RAL    | LPV/rq | 6.31               | 1.69 | 6.64  | 6.30               | 7.45  | 6.64  | 7.45  | 7.99               | 12.94 | 8.33  | 14.63 | 7.73                  | 11.95 | 8.86  | 14.49 |
| AZTb                 | ETR    | ATV/r  | 0.37               | 6.31 | 7.44  | 6.30               | 7.44  | 8.00  | 8.00  | 6.67               | 7.81  | 13.75 | 14.12 | 7.69                  | 7.57  | 12.46 | 17.08 |
| ETR                  | LPV/rq | MVC    | 6.31               | 6.64 | 1.72  | 7.45               | 6.30  | 6.64  | 7.45  | 12.94              | 8.03  | 8.36  | 14.67 | 11.95                 | 9.41  | 6.64  | 14.34 |
| AZTt                 | ETR    | ATV/r  | 0.39               | 6.31 | 7.44  | 6.30               | 7.44  | 8.00  | 8.00  | 6.70               | 7.84  | 13.75 | 14.14 | 7.78                  | 7.58  | 12.46 | 17.16 |
| ddlB                 | TDF    | DRV/rq | 0.75               | 0.86 | 10.28 | 1.06               | 10.28 | 10.28 | 10.28 | 1.61               | 11.02 | 11.14 | 11.88 | 1.03                  | 10.64 | 10.66 | 10.99 |
| d4T                  | EFV    | LPV/rq | 0.25               | 7.35 | 6.64  | 7.35               | 6.64  | 7.95  | 7.95  | 7.60               | 6.89  | 13.99 | 14.24 | 8.00                  | 6.80  | 13.56 | 16.33 |
| FTC                  | NVP    | ATV/r  | 2.79               | 4.43 | 7.44  | 4.48               | 7.44  | 7.53  | 7.53  | 7.22               | 10.23 | 11.88 | 14.67 | 6.21                  | 9.00  | 10.29 | 11.86 |
| d4T                  | EVG/c  | DRV/rq | 0.25               | 1.41 | 10.28 | 1.42               | 10.28 | 10.28 | 10.28 | 1.66               | 10.53 | 11.69 | 11.94 | 1.70                  | 10.50 | 11.74 | 11.90 |
| ddlq                 | TDF    | DRV/rq | 0.84               | 0.86 | 10.28 | 1.10               | 10.28 | 10.28 | 10.28 | 1.70               | 11.12 | 11.14 | 11.97 | 1.07                  | 10.68 | 10.66 | 11.03 |
| FTC                  | ETR    | ATV    | 2.79               | 6.31 | 5.97  | 6.31               | 5.98  | 7.22  | 7.22  | 9.10               | 8.76  | 12.27 | 15.06 | 6.83                  | 7.53  | 11.14 | 11.57 |
| ETR                  | EVG/c  | LPV/rb | 6.31               | 1.41 | 6.97  | 6.30               | 7.61  | 6.97  | 7.61  | 7.72               | 13.28 | 8.39  | 14.69 | 7.55                  | 12.26 | 9.19  | 15.21 |
| ABCb                 | ETR    | LPV/rq | 1.91               | 6.31 | 6.64  | 6.31               | 6.64  | 7.45  | 7.45  | 8.22               | 8.55  | 12.94 | 14.86 | 6.62                  | 7.67  | 11.95 | 11.69 |
| AZTb                 | EFV    | LPV/rq | 0.37               | 7.35 | 6.64  | 7.35               | 6.64  | 7.95  | 7.95  | 7.72               | 7.01  | 13.99 | 14.36 | 8.91                  | 7.14  | 13.56 | 20.94 |
| AZTt                 | EFV    | LPV/rq | 0.39               | 7.35 | 6.64  | 7.35               | 6.64  | 7.95  | 7.95  | 7.75               | 7.03  | 13.99 | 14.39 | 9.02                  | 7.17  | 13.56 | 21.04 |
| AZTb                 | EVG/c  | DRV/rq | 0.37               | 1.41 | 10.28 | 1.42               | 10.28 | 10.28 | 10.28 | 1.78               | 10.64 | 11.69 | 12.06 | 1.84                  | 10.51 | 11.74 | 11.82 |
| AZTb                 | d4T    | DRV/rb | 0.37               | 0.25 | 10.87 | 0.45               | 10.87 | 10.87 | 10.87 | 0.62               | 11.23 | 11.12 | 11.48 | 0.45                  | 11.10 | 11.08 | 11.32 |
| AZTt                 | EVG/c  | DRV/rq | 0.39               | 1.41 | 10.28 | 1.42               | 10.28 | 10.28 | 10.28 | 1.81               | 10.67 | 11.69 | 12.08 | 1.87                  | 10.52 | 11.74 | 11.84 |
| AZTt                 | d4T    | DRV/rb | 0.39               | 0.25 | 10.87 | 0.47               | 10.87 | 10.87 | 10.87 | 0.64               | 11.26 | 11.12 | 11.51 | 0.47                  | 11.11 | 11.08 | 11.34 |
| ETR                  | ENF    | LPV/rq | 6.31               | 2.07 | 6.64  | 6.31               | 7.45  | 6.64  | 7.45  | 8.38               | 12.94 | 8.71  | 15.02 | 8.20                  | 11.95 | 7.88  | 13.39 |
| d4T                  | RAL    | DRV/rq | 0.25               | 1.69 | 10.28 | 1.69               | 10.28 | 10.28 | 10.28 | 1.94               | 10.53 | 11.96 | 12.21 | 2.01                  | 10.50 | 12.17 | 12.28 |
| ddlB                 | ETR    | ATV/r  | 0.75               | 6.31 | 7.44  | 6.31               | 7.44  | 8.00  | 8.00  | 7.05               | 8.19  | 13.75 | 14.49 | 6.28                  | 7.97  | 12.46 | 11.68 |
| ABCq                 | ETR    | LPV/rq | 2.14               | 6.31 | 6.64  | 6.31               | 6.64  | 7.45  | 7.45  | 8.45               | 8.78  | 12.94 | 15.09 | 6.66                  | 7.79  | 11.95 | 11.82 |
| EFV                  | EVG/c  | ATV    | 7.35               | 1.41 | 5.97  | 7.35               | 7.83  | 5.97  | 7.83  | 8.77               | 13.32 | 7.38  | 14.73 | 8.86                  | 11.89 | 8.10  | 15.12 |
| ETR                  | RAL    | LPV/rb | 6.31               | 1.69 | 6.97  | 6.30               | 7.61  | 6.97  | 7.61  | 7.99               | 13.28 | 8.66  | 14.97 | 7.73                  | 12.26 | 9.20  | 14.84 |

| Regimen <sup>a</sup> |        |        | IIP <sub>ave</sub> |      |       |                    |       |       |       |                    |       |       |       |                       |       |       |       |
|----------------------|--------|--------|--------------------|------|-------|--------------------|-------|-------|-------|--------------------|-------|-------|-------|-----------------------|-------|-------|-------|
|                      |        |        | Single drug        |      |       | Loewe <sup>b</sup> |       |       |       | Bliss <sup>c</sup> |       |       |       | DI Index <sup>d</sup> |       |       |       |
| Drug 1               | Drug 2 | Drug 3 | 1                  | 2    | 3     | 1,2                | 1,3   | 2,3   | 1,2,3 | 1,2                | 1,3   | 2,3   | 1,2,3 | 1,2                   | 1,3   | 2,3   | 1,2,3 |
| ddIq                 | ETR    | ATV/r  | 0.84               | 6.31 | 7.44  | 6.31               | 7.44  | 8.00  | 8.00  | 7.14               | 8.28  | 13.75 | 14.59 | 6.28                  | 8.04  | 12.46 | 11.74 |
| TDF                  | ETR    | ATV/r  | 0.86               | 6.31 | 7.44  | 6.30               | 7.44  | 8.00  | 8.00  | 7.16               | 8.30  | 13.75 | 14.61 | 6.44                  | 7.80  | 12.46 | 11.45 |
| AZTb                 | RAL    | DRV/rq | 0.37               | 1.69 | 10.28 | 1.69               | 10.28 | 10.28 | 10.28 | 2.05               | 10.64 | 11.96 | 12.33 | 2.08                  | 10.51 | 12.17 | 12.15 |
| d4T                  | EFV    | LPV/rb | 0.25               | 7.35 | 6.97  | 7.35               | 6.97  | 8.06  | 8.06  | 7.60               | 7.22  | 14.33 | 14.58 | 8.00                  | 7.13  | 13.88 | 16.66 |
| AZTt                 | RAL    | DRV/rq | 0.39               | 1.69 | 10.28 | 1.69               | 10.28 | 10.28 | 10.28 | 2.08               | 10.67 | 11.96 | 12.36 | 2.11                  | 10.52 | 12.17 | 12.17 |
| ddIb                 | EFV    | LPV/rq | 0.75               | 7.35 | 6.64  | 7.35               | 6.64  | 7.95  | 7.95  | 8.10               | 7.39  | 13.99 | 14.74 | 7.77                  | 7.20  | 13.56 | 13.24 |
| 3TCb                 | ETR    | LPV/rq | 2.30               | 6.31 | 6.64  | 6.31               | 6.64  | 7.45  | 7.45  | 8.61               | 8.94  | 12.94 | 15.25 | 6.86                  | 7.77  | 11.95 | 11.92 |
| ddIb                 | EVG/c  | DRV/rq | 0.75               | 1.41 | 10.28 | 1.60               | 10.28 | 10.28 | 10.28 | 2.16               | 11.02 | 11.69 | 12.44 | 2.25                  | 10.64 | 11.74 | 12.03 |
| d4T                  | ABCb   | DRV/rq | 0.25               | 1.91 | 10.28 | 1.92               | 10.28 | 10.28 | 10.28 | 2.16               | 10.53 | 12.19 | 12.44 | 2.42                  | 10.50 | 11.77 | 12.31 |
| d4T                  | ddIb   | DRV/rb | 0.25               | 0.75 | 10.87 | 0.82               | 10.87 | 10.87 | 10.87 | 1.09               | 11.12 | 11.61 | 11.86 | 1.34                  | 11.08 | 11.23 | 11.67 |
| 3TCq                 | ETR    | LPV/rq | 2.35               | 6.31 | 6.64  | 6.31               | 6.64  | 7.45  | 7.45  | 8.65               | 8.99  | 12.94 | 15.29 | 6.87                  | 7.79  | 11.95 | 11.95 |
| AZTb                 | EFV    | LPV/rb | 0.37               | 7.35 | 6.97  | 7.35               | 6.97  | 8.06  | 8.06  | 7.72               | 7.34  | 14.33 | 14.69 | 8.91                  | 7.47  | 13.88 | 21.39 |
| AZTt                 | EFV    | LPV/rb | 0.39               | 7.35 | 6.97  | 7.35               | 6.97  | 8.06  | 8.06  | 7.75               | 7.37  | 14.33 | 14.72 | 9.02                  | 7.51  | 13.88 | 21.48 |
| ddIq                 | EFV    | LPV/rq | 0.84               | 7.35 | 6.64  | 7.36               | 6.64  | 7.95  | 7.95  | 8.19               | 7.48  | 13.99 | 14.83 | 7.82                  | 7.26  | 13.56 | 13.31 |
| TDF                  | EFV    | LPV/rq | 0.86               | 7.35 | 6.64  | 7.35               | 6.64  | 7.95  | 7.95  | 8.21               | 7.50  | 13.99 | 14.85 | 7.97                  | 7.07  | 13.56 | 13.22 |
| ddIq                 | EVG/c  | DRV/rq | 0.84               | 1.41 | 10.28 | 1.62               | 10.28 | 10.28 | 10.28 | 2.25               | 11.12 | 11.69 | 12.53 | 2.36                  | 10.68 | 11.74 | 12.11 |
| ABCb                 | ETR    | LPV/rb | 1.91               | 6.31 | 6.97  | 6.31               | 6.97  | 7.61  | 7.61  | 8.22               | 8.89  | 13.28 | 15.19 | 6.62                  | 8.00  | 12.26 | 11.97 |
| d4T                  | ddIq   | DRV/rb | 0.25               | 0.84 | 10.87 | 0.90               | 10.87 | 10.87 | 10.87 | 1.09               | 11.12 | 11.70 | 11.95 | 1.45                  | 11.08 | 11.27 | 11.76 |
| TDF                  | EVG/c  | DRV/rq | 0.86               | 1.41 | 10.28 | 1.43               | 10.28 | 10.28 | 10.28 | 2.27               | 11.14 | 11.69 | 12.55 | 2.25                  | 10.66 | 11.74 | 12.04 |
| AZTb                 | ABCb   | DRV/rq | 0.37               | 1.91 | 10.28 | 1.91               | 10.28 | 10.28 | 10.28 | 2.28               | 10.64 | 12.19 | 12.56 | 2.84                  | 10.51 | 11.77 | 12.36 |
| d4T                  | TDF    | DRV/rb | 0.25               | 0.86 | 10.87 | 0.87               | 10.87 | 10.87 | 10.87 | 1.11               | 11.12 | 11.73 | 11.97 | 1.67                  | 11.08 | 11.25 | 11.80 |
| EFV                  | RAL    | ATV    | 7.35               | 1.69 | 5.97  | 7.35               | 7.83  | 5.97  | 7.83  | 9.04               | 13.32 | 7.65  | 15.01 | 9.55                  | 11.89 | 8.52  | 16.02 |
| AZTb                 | ddIb   | DRV/rb | 0.37               | 0.75 | 10.87 | 0.83               | 10.87 | 10.87 | 10.87 | 1.11               | 11.23 | 11.61 | 11.98 | 1.51                  | 11.10 | 11.23 | 11.61 |
| AZTt                 | ABCb   | DRV/rq | 0.39               | 1.91 | 10.28 | 1.91               | 10.28 | 10.28 | 10.28 | 2.31               | 10.67 | 12.19 | 12.58 | 2.91                  | 10.52 | 11.77 | 12.39 |
| AZTt                 | ddIb   | DRV/rb | 0.39               | 0.75 | 10.87 | 0.84               | 10.87 | 10.87 | 10.87 | 1.14               | 11.26 | 11.61 | 12.00 | 1.55                  | 11.11 | 11.23 | 11.63 |
| d4T                  | ENF    | DRV/rq | 0.25               | 2.07 | 10.28 | 2.07               | 10.28 | 10.28 | 10.28 | 2.32               | 10.53 | 12.35 | 12.60 | 2.34                  | 10.50 | 10.39 | 11.51 |
| AZTb                 | ddIq   | DRV/rb | 0.37               | 0.84 | 10.87 | 0.91               | 10.87 | 10.87 | 10.87 | 1.21               | 11.23 | 11.70 | 12.07 | 1.61                  | 11.10 | 11.27 | 11.68 |
| d4T                  | ABCq   | DRV/rq | 0.25               | 2.14 | 10.28 | 2.14               | 10.28 | 10.28 | 10.28 | 2.39               | 10.53 | 12.42 | 12.67 | 2.65                  | 10.50 | 11.94 | 12.55 |
| AZTb                 | TDF    | DRV/rb | 0.37               | 0.86 | 10.87 | 0.87               | 10.87 | 10.87 | 10.87 | 1.23               | 11.23 | 11.73 | 12.09 | 1.92                  | 11.10 | 11.25 | 11.75 |
| AZTt                 | ddIq   | DRV/rb | 0.39               | 0.84 | 10.87 | 0.92               | 10.87 | 10.87 | 10.87 | 1.23               | 11.26 | 11.70 | 12.10 | 1.66                  | 11.11 | 11.27 | 11.70 |
| ddIEC                | ETR    | LPV/rq | 2.56               | 6.31 | 6.64  | 6.33               | 6.66  | 7.45  | 7.46  | 8.87               | 9.20  | 12.94 | 15.50 | 6.24                  | 8.55  | 11.95 | 12.26 |
| ETR                  | ENF    | LPV/rb | 6.31               | 2.07 | 6.97  | 6.31               | 7.61  | 6.98  | 7.62  | 8.38               | 13.28 | 9.04  | 15.35 | 8.20                  | 12.26 | 8.21  | 13.68 |
| AZTt                 | TDF    | DRV/rb | 0.39               | 0.86 | 10.87 | 0.87               | 10.87 | 10.87 | 10.87 | 1.25               | 11.26 | 11.73 | 12.12 | 1.99                  | 11.11 | 11.25 | 11.77 |
| ddIb                 | RAL    | DRV/rq | 0.75               | 1.69 | 10.28 | 1.83               | 10.28 | 10.28 | 10.28 | 2.43               | 11.02 | 11.96 | 12.71 | 2.38                  | 10.64 | 12.17 | 12.31 |
| AZTb                 | ENF    | DRV/rq | 0.37               | 2.07 | 10.28 | 2.07               | 10.28 | 10.28 | 10.28 | 2.44               | 10.64 | 12.35 | 12.72 | 2.51                  | 10.51 | 10.39 | 11.34 |
| AZTt                 | ENF    | DRV/rq | 0.39               | 2.07 | 10.28 | 2.07               | 10.28 | 10.28 | 10.28 | 2.46               | 10.67 | 12.35 | 12.74 | 2.54                  | 10.52 | 10.39 | 11.35 |
| ABCq                 | ETR    | LPV/rb | 2.14               | 6.31 | 6.97  | 6.31               | 6.97  | 7.61  | 7.61  | 8.45               | 9.12  | 13.28 | 15.42 | 6.66                  | 8.13  | 12.26 | 12.10 |
| AZTb                 | ABCq   | DRV/rq | 0.37               | 2.14 | 10.28 | 2.14               | 10.28 | 10.28 | 10.28 | 2.51               | 10.64 | 12.42 | 12.79 | 3.07                  | 10.51 | 11.94 | 12.60 |
| ABCb                 | EFV    | ATV    | 1.91               | 7.35 | 5.97  | 7.35               | 5.97  | 7.83  | 7.83  | 9.27               | 7.88  | 13.32 | 15.23 | 8.81                  | 7.02  | 11.89 | 13.00 |
| ddIq                 | RAL    | DRV/rq | 0.84               | 1.69 | 10.28 | 1.85               | 10.28 | 10.28 | 10.28 | 2.53               | 11.12 | 11.96 | 12.80 | 2.47                  | 10.68 | 12.17 | 12.38 |
| AZTt                 | ABCq   | DRV/rq | 0.39               | 2.14 | 10.28 | 2.14               | 10.28 | 10.28 | 10.28 | 2.54               | 10.67 | 12.42 | 12.81 | 3.13                  | 10.52 | 11.94 | 12.63 |
| TDF                  | RAL    | DRV/rq | 0.86               | 1.69 | 10.28 | 1.69               | 10.28 | 10.28 | 10.28 | 2.55               | 11.14 | 11.96 | 12.82 | 2.71                  | 10.66 | 12.17 | 12.44 |
| d4T                  | 3TCb   | DRV/rq | 0.25               | 2.30 | 10.28 | 2.31               | 10.28 | 10.28 | 10.28 | 2.55               | 10.53 | 12.58 | 12.83 | 2.72                  | 10.50 | 11.71 | 12.44 |
| ddIb                 | EFV    | LPV/rb | 0.75               | 7.35 | 6.97  | 7.35               | 6.98  | 8.06  | 8.06  | 8.10               | 7.72  | 14.33 | 15.07 | 7.77                  | 7.53  | 13.88 | 13.54 |
| d4T                  | 3TCq   | DRV/rq | 0.25               | 2.35 | 10.28 | 2.35               | 10.28 | 10.28 | 10.28 | 2.60               | 10.53 | 12.63 | 12.88 | 2.77                  | 10.50 | 11.74 | 12.48 |
| ETR                  | EVG/c  | ATV/r  | 6.31               | 1.41 | 7.44  | 6.30               | 8.00  | 7.44  | 8.00  | 7.72               | 13.75 | 8.86  | 15.16 | 7.55                  | 12.46 | 9.57  | 15.44 |
| FTC                  | ETR    | LPV/rq | 2.79               | 6.31 | 6.64  | 6.31               | 6.64  | 7.45  | 7.45  | 9.10               | 9.43  | 12.94 | 15.73 | 6.83                  | 8.38  | 11.95 | 12.43 |
| 3TCb                 | ETR    | LPV/rb | 2.30               | 6.31 | 6.97  | 6.31               | 6.97  | 7.61  | 7.61  | 8.61               | 9.28  | 13.28 | 15.58 | 6.86                  | 8.10  | 12.26 | 12.20 |
| ddIb                 | ABCb   | DRV/rq | 0.75               | 1.91 | 10.28 | 2.04               | 10.28 | 10.28 | 10.28 | 2.66               | 11.02 | 12.19 | 12.94 | 2.17                  | 10.64 | 11.77 | 11.88 |
| ddIq                 | EFV    | LPV/rb | 0.84               | 7.35 | 6.97  | 7.36               | 6.98  | 8.06  | 8.06  | 8.19               | 7.81  | 14.33 | 15.17 | 7.82                  | 7.60  | 13.88 | 13.60 |
| EFV                  | ENF    | ATV    | 7.35               | 2.07 | 5.97  | 7.35               | 7.83  | 5.98  | 7.83  | 9.42               | 13.32 | 8.04  | 15.39 | 9.20                  | 11.89 | 7.65  | 13.93 |
| AZTb                 | 3TCb   | DRV/rq | 0.37               | 2.30 | 10.28 | 2.30               | 10.28 | 10.28 | 10.28 | 2.67               | 10.64 | 12.58 | 12.95 | 2.91                  | 10.51 | 11.71 | 12.26 |
| TDF                  | EFV    | LPV/rb | 0.86               | 7.35 | 6.97  | 7.35               | 6.97  | 8.06  | 8.06  | 8.21               | 7.83  | 14.33 | 15.19 | 7.97                  | 7.41  | 13.88 | 13.49 |
| 3TCq                 | ETR    | LPV/rb | 2.35               | 6.31 | 6.97  | 6.31               | 6.97  | 7.61  | 7.61  | 8.65               | 9.32  | 13.28 | 15.63 | 6.87                  | 8.12  | 12.26 | 12.22 |
| AZTt                 | 3TCb   | DRV/rq | 0.39               | 2.30 | 10.28 | 2.30               | 10.28 | 10.28 | 10.28 | 2.70               | 10.67 | 12.58 | 12.97 | 2.95                  | 10.52 | 11.71 | 12.29 |
| AZTb                 | 3TCq   | DRV/rq | 0.37               | 2.35 | 10.28 | 2.35               | 10.28 | 10.28 | 10.28 | 2.72               | 10.64 | 12.63 | 12.99 | 2.95                  | 10.51 | 11.74 | 12.30 |
| ABCq                 | EFV    | ATV    | 2.14               | 7.35 | 5.97  | 7.35               | 5.97  | 7.83  | 7.83  | 9.50               | 8.11  | 13.32 | 15.46 | 8.98                  | 7.14  | 11.89 | 13.16 |
| AZTt                 | 3TCq   | DRV/rq | 0.39               | 2.35 | 10.28 | 2.35               | 10.28 | 10.28 | 10.28 | 2.74               | 10.67 | 12.63 | 13.02 | 2.99                  | 10.52 | 11.74 | 12.32 |
| ddIq                 | ABCb   | DRV/rq | 0.84               | 1.91 | 10.28 | 2.06               | 10.28 | 10.28 | 10.28 | 2.75               | 11.12 | 12.19 | 13.03 | 2.20                  | 10.68 | 11.77 | 11.93 |
| TDF                  | ABCb   | DRV/rq | 0.86               | 1.91 | 10.28 | 1.92               | 10.28 | 10.28 | 10.28 | 2.77               | 11.14 | 12.19 | 13.05 | 1.89                  | 10.66 | 11.77 | 11.86 |
| ddIb                 | TDF    | DRV/rb | 0.75               | 0.86 | 10.87 | 1.06               | 10.87 | 10.87 | 10.87 | 1.61               | 11.61 | 11.73 | 12.47 | 1.03                  | 11.23 | 11.25 | 11.58 |
| EFV                  | EVG/c  | LPV/rq | 7.35               | 1.41 | 6.64  | 7.35               | 7.95  | 6.64  | 7.95  | 8.77               | 13.99 | 8.05  | 15.41 | 8.86                  | 13.56 | 8.86  | 16.52 |
| d4T                  | ddIEC  | DRV/rq | 0.25               | 2.56 | 10.28 | 2.56               | 10.28 | 10.28 | 10.28 | 2.81               | 10.53 | 12.84 | 13.09 | 3.29                  | 10.50 | 11.52 | 12.99 |
| ddIb                 | ENF    | DRV/rq | 0.75               | 2.07 | 10.28 | 2.24               | 10.28 | 10.28 | 10.28 | 2.82               | 11.02 | 12.35 | 13.09 | 2.71                  | 10.64 | 10.39 | 11.22 |
| d4T                  | EFV    | ATV/r  | 0.25               | 7.35 | 7.44  | 7.35               | 7.44  | 8.35  | 8.35  | 7.60               | 7.69  | 14.80 | 15.05 | 8.00                  | 7.53  | 13.12 | 16.13 |
| d4T                  | EVG/c  | DRV/rb | 0.25               | 1.41 | 10.87 | 1.42               | 10.87 | 10.87 | 10.87 | 1.66               | 11.12 | 12.28 | 12.53 | 1.70                  | 11.08 | 12.33 | 12.49 |
| ddIq                 | TDF    | DRV/rb | 0.84               | 0.86 | 10.87 | 1.10               | 10.87 | 10.87 | 10.87 | 1.70               | 11.70 | 11.73 | 12.56 | 1.07                  | 11.27 | 11.25 | 11.62 |
| ETR                  | RAL    | ATV/r  | 6.31               | 1.69 | 7.44  | 6.30               | 8.00  | 7.44  | 8.00  | 7.99               | 13.75 | 9.13  | 15.43 | 7.73                  | 12.46 | 10.00 | 15.72 |
| ddIb                 | ABCq   | DRV/rq | 0.75               | 2.14 | 10.28 | 2.24               | 10.28 | 10.28 | 10.28 | 2.89               | 11.02 | 12.42 | 13.17 | 2.38                  | 10.64 | 11.94 | 12.01 |
| 3TCb                 | EFV    | ATV    | 2.30               | 7.35 | 5.97  | 7.35               | 5.97  | 7.83  | 7.83  | 9.66               | 8.27  | 13.32 | 15.62 | 8.38                  | 6.90  | 11.89 | 12.23 |



| Regimen <sup>a</sup> |        |        | HIV <sub>ave</sub> |      |       |                    |       |       |       |                    |       |       |       |                       |       |       |       |
|----------------------|--------|--------|--------------------|------|-------|--------------------|-------|-------|-------|--------------------|-------|-------|-------|-----------------------|-------|-------|-------|
|                      |        |        | Single drug        |      |       | Loewe <sup>b</sup> |       |       |       | Bliss <sup>c</sup> |       |       |       | DI Index <sup>d</sup> |       |       |       |
| Drug 1               | Drug 2 | Drug 3 | 1                  | 2    | 3     | 1,2                | 1,3   | 2,3   | 1,2,3 | 1,2                | 1,3   | 2,3   | 1,2,3 | 1,2                   | 1,3   | 2,3   | 1,2,3 |
| ddIEC                | ETR    | LPV/rb | 2.56               | 6.31 | 6.97  | 6.33               | 6.99  | 7.61  | 7.62  | 8.87               | 9.53  | 13.28 | 15.84 | 6.24                  | 8.88  | 12.26 | 12.56 |
| ddlq                 | ENF    | DRV/rq | 0.84               | 2.07 | 10.28 | 2.26               | 10.28 | 10.28 | 10.28 | 2.91               | 11.12 | 12.35 | 13.19 | 2.79                  | 10.68 | 10.39 | 11.26 |
| AZTb                 | ddIEC  | DRV/rq | 0.37               | 2.56 | 10.28 | 2.56               | 10.28 | 10.28 | 10.28 | 2.93               | 10.64 | 12.84 | 13.20 | 3.41                  | 10.51 | 11.52 | 12.58 |
| TDF                  | ENF    | DRV/rq | 0.86               | 2.07 | 10.28 | 2.08               | 10.28 | 10.28 | 10.28 | 2.93               | 11.14 | 12.35 | 13.21 | 2.63                  | 10.66 | 10.39 | 11.15 |
| 3TCq                 | EFV    | ATV    | 2.35               | 7.35 | 5.97  | 7.35               | 5.97  | 7.83  | 7.83  | 9.70               | 8.32  | 13.32 | 15.67 | 8.40                  | 6.92  | 11.89 | 12.25 |
| AZTt                 | ddIEC  | DRV/rq | 0.39               | 2.56 | 10.28 | 2.56               | 10.28 | 10.28 | 10.28 | 2.95               | 10.67 | 12.84 | 13.23 | 3.46                  | 10.52 | 11.52 | 12.61 |
| AZTb                 | EFV    | ATV/r  | 0.37               | 7.35 | 7.44  | 7.35               | 7.44  | 8.35  | 8.35  | 7.72               | 7.81  | 14.80 | 15.16 | 8.91                  | 7.57  | 13.12 | 19.86 |
| AZTb                 | EVG/c  | DRV/rb | 0.37               | 1.41 | 10.87 | 1.42               | 10.87 | 10.87 | 10.87 | 1.78               | 11.23 | 12.28 | 12.65 | 1.84                  | 11.10 | 12.33 | 12.41 |
| ddlq                 | ABCq   | DRV/rq | 0.84               | 2.14 | 10.28 | 2.25               | 10.28 | 10.28 | 10.28 | 2.98               | 11.12 | 12.42 | 13.26 | 2.41                  | 10.68 | 11.94 | 12.06 |
| AZTt                 | EFV    | ATV/r  | 0.39               | 7.35 | 7.44  | 7.35               | 7.44  | 8.35  | 8.35  | 7.75               | 7.84  | 14.80 | 15.19 | 9.02                  | 7.58  | 13.12 | 19.96 |
| AZTt                 | EVG/c  | DRV/rb | 0.39               | 1.41 | 10.87 | 1.42               | 10.87 | 10.87 | 10.87 | 1.81               | 11.26 | 12.28 | 12.67 | 1.87                  | 11.11 | 12.33 | 12.43 |
| TDF                  | ABCq   | DRV/rq | 0.86               | 2.14 | 10.28 | 2.14               | 10.28 | 10.28 | 10.28 | 3.00               | 11.14 | 12.42 | 13.28 | 2.11                  | 10.66 | 11.94 | 11.98 |
| d4T                  | FTC    | DRV/rq | 0.25               | 2.79 | 10.28 | 2.79               | 10.28 | 10.28 | 10.28 | 3.04               | 10.53 | 13.07 | 13.32 | 3.21                  | 10.50 | 11.67 | 12.72 |
| 3TCb                 | ddlq   | DRV/rq | 2.30               | 0.75 | 10.28 | 2.39               | 10.28 | 10.28 | 10.28 | 3.05               | 12.58 | 11.02 | 13.33 | 2.55                  | 11.71 | 10.64 | 11.88 |
| EFV                  | RAL    | LPV/rq | 7.35               | 1.69 | 6.64  | 7.35               | 7.95  | 6.64  | 7.95  | 9.04               | 13.99 | 8.33  | 15.68 | 9.55                  | 13.56 | 8.86  | 16.83 |
| 3TCq                 | ddlq   | DRV/rq | 2.35               | 0.75 | 10.28 | 2.44               | 10.28 | 10.28 | 10.28 | 3.10               | 12.63 | 11.02 | 13.37 | 2.59                  | 11.74 | 10.64 | 11.90 |
| ABCb                 | ETR    | ATV/r  | 1.91               | 6.31 | 7.44  | 6.31               | 7.44  | 8.00  | 8.00  | 8.22               | 9.36  | 13.75 | 15.66 | 6.62                  | 8.49  | 12.46 | 12.29 |
| EFV                  | LPV/rq | MVC    | 7.35               | 6.64 | 1.72  | 7.95               | 7.35  | 6.64  | 7.95  | 13.99              | 9.08  | 8.36  | 15.72 | 13.56                 | 10.23 | 6.64  | 15.52 |
| d4T                  | RAL    | DRV/rb | 0.25               | 1.69 | 10.87 | 1.69               | 10.87 | 10.87 | 10.87 | 1.94               | 11.12 | 12.55 | 12.80 | 2.01                  | 11.08 | 12.76 | 12.86 |
| FTC                  | ETR    | LPV/rq | 2.79               | 6.31 | 6.97  | 6.31               | 6.97  | 7.61  | 7.61  | 9.10               | 9.76  | 13.28 | 16.07 | 6.83                  | 8.72  | 12.26 | 12.72 |
| 3TCb                 | ddlq   | DRV/rq | 2.30               | 0.84 | 10.28 | 2.41               | 10.28 | 10.28 | 10.28 | 3.14               | 12.58 | 11.12 | 13.42 | 2.58                  | 11.71 | 10.68 | 11.93 |
| AZTb                 | FTC    | DRV/rq | 0.37               | 2.79 | 10.28 | 2.79               | 10.28 | 10.28 | 10.28 | 3.16               | 10.64 | 13.07 | 13.43 | 3.55                  | 10.51 | 11.67 | 12.71 |
| ddIEC                | EFV    | ATV    | 2.56               | 7.35 | 5.97  | 7.36               | 6.03  | 7.83  | 7.84  | 9.91               | 8.53  | 13.32 | 15.88 | 8.77                  | 7.81  | 11.89 | 13.27 |
| 3TCb                 | TDF    | DRV/rq | 2.30               | 0.86 | 10.28 | 2.30               | 10.28 | 10.28 | 10.28 | 3.16               | 12.58 | 11.14 | 13.44 | 2.97                  | 11.71 | 10.66 | 12.07 |
| AZTt                 | FTC    | DRV/rq | 0.39               | 2.79 | 10.28 | 2.79               | 10.28 | 10.28 | 10.28 | 3.18               | 10.67 | 13.07 | 13.46 | 3.60                  | 10.52 | 11.67 | 12.73 |
| 3TCq                 | ddlq   | DRV/rq | 2.35               | 0.84 | 10.28 | 2.45               | 10.28 | 10.28 | 10.28 | 3.19               | 12.63 | 11.12 | 13.47 | 2.62                  | 11.74 | 10.68 | 11.95 |
| 3TCq                 | TDF    | DRV/rq | 2.35               | 0.86 | 10.28 | 2.35               | 10.28 | 10.28 | 10.28 | 3.21               | 12.63 | 11.14 | 13.49 | 3.02                  | 11.74 | 10.66 | 12.10 |
| AZTb                 | RAL    | DRV/rb | 0.37               | 1.69 | 10.87 | 1.69               | 10.87 | 10.87 | 10.87 | 2.05               | 11.23 | 12.55 | 12.92 | 2.08                  | 11.10 | 12.76 | 12.73 |
| EFV                  | EVG/c  | LPV/rb | 7.35               | 1.41 | 6.97  | 7.35               | 8.06  | 6.97  | 8.06  | 8.77               | 14.33 | 8.39  | 15.74 | 8.86                  | 13.88 | 9.19  | 16.90 |
| AZTt                 | RAL    | DRV/rb | 0.39               | 1.69 | 10.87 | 1.69               | 10.87 | 10.87 | 10.87 | 2.08               | 11.26 | 12.55 | 12.95 | 2.11                  | 11.11 | 12.76 | 12.75 |
| ETR                  | ENF    | ATV/r  | 6.31               | 2.07 | 7.44  | 6.31               | 8.00  | 7.44  | 8.00  | 8.38               | 13.75 | 9.51  | 15.82 | 8.20                  | 12.46 | 9.12  | 14.45 |
| ABCb                 | EFV    | LPV/rq | 1.91               | 7.35 | 6.64  | 7.35               | 6.64  | 7.95  | 7.95  | 9.27               | 8.55  | 13.99 | 15.91 | 8.81                  | 7.67  | 13.56 | 14.16 |
| ABCb                 | EVG/c  | DRV/rq | 1.91               | 1.41 | 10.28 | 2.02               | 10.28 | 10.28 | 10.28 | 3.33               | 12.19 | 11.69 | 13.61 | 3.39                  | 11.77 | 11.74 | 13.35 |
| ABCq                 | ETR    | ATV/r  | 2.14               | 6.31 | 7.44  | 6.31               | 7.44  | 8.00  | 8.00  | 8.45               | 9.59  | 13.75 | 15.89 | 6.66                  | 8.62  | 12.46 | 12.41 |
| ddlq                 | EVG/c  | DRV/rb | 0.75               | 1.41 | 10.87 | 1.60               | 10.87 | 10.87 | 10.87 | 2.16               | 11.61 | 12.28 | 13.03 | 2.25                  | 11.23 | 12.33 | 12.61 |
| ddlq                 | EFV    | ATV/r  | 0.75               | 7.35 | 7.44  | 7.35               | 7.44  | 8.35  | 8.35  | 8.10               | 8.19  | 14.80 | 15.54 | 7.77                  | 7.97  | 13.12 | 13.26 |
| d4T                  | ABCb   | DRV/rb | 0.25               | 1.91 | 10.87 | 1.92               | 10.87 | 10.87 | 10.87 | 2.16               | 11.12 | 12.78 | 13.03 | 2.42                  | 11.08 | 12.35 | 12.89 |
| FTC                  | EFV    | ATV    | 2.79               | 7.35 | 5.97  | 7.35               | 5.98  | 7.83  | 7.83  | 10.14              | 8.76  | 13.32 | 16.11 | 8.63                  | 7.53  | 11.89 | 12.84 |
| ddIEC                | TDF    | DRV/rq | 2.56               | 0.86 | 10.28 | 2.56               | 10.28 | 10.28 | 10.28 | 3.42               | 12.84 | 11.14 | 13.70 | 2.51                  | 11.52 | 10.66 | 11.69 |
| ddlq                 | EVG/c  | DRV/rb | 0.84               | 1.41 | 10.87 | 1.62               | 10.87 | 10.87 | 10.87 | 2.25               | 11.70 | 12.28 | 13.12 | 2.36                  | 11.27 | 12.33 | 12.69 |
| ddlq                 | EFV    | ATV/r  | 0.84               | 7.35 | 7.44  | 7.36               | 7.44  | 8.35  | 8.35  | 8.19               | 8.28  | 14.80 | 15.63 | 7.82                  | 8.04  | 13.12 | 13.32 |
| TDF                  | EFV    | ATV/r  | 0.86               | 7.35 | 7.44  | 7.35               | 7.44  | 8.35  | 8.35  | 8.21               | 8.30  | 14.80 | 15.66 | 7.97                  | 7.80  | 13.12 | 13.06 |
| TDF                  | EVG/c  | DRV/rb | 0.86               | 1.41 | 10.87 | 1.43               | 10.87 | 10.87 | 10.87 | 2.27               | 11.73 | 12.28 | 13.14 | 2.25                  | 11.25 | 12.33 | 12.63 |
| EFV                  | ENF    | LPV/rq | 7.35               | 2.07 | 6.64  | 7.35               | 7.95  | 6.64  | 7.95  | 9.42               | 13.99 | 8.71  | 16.06 | 9.20                  | 13.56 | 7.88  | 14.70 |
| AZTb                 | ABCb   | DRV/rb | 0.37               | 1.91 | 10.87 | 1.91               | 10.87 | 10.87 | 10.87 | 2.28               | 11.23 | 12.78 | 13.15 | 2.84                  | 11.10 | 12.35 | 12.93 |
| AZTt                 | ABCb   | DRV/rb | 0.39               | 1.91 | 10.87 | 1.91               | 10.87 | 10.87 | 10.87 | 2.31               | 11.26 | 12.78 | 13.17 | 2.91                  | 11.11 | 12.35 | 12.96 |
| ENF                  | EVG/c  | DRV/rq | 2.07               | 1.41 | 10.28 | 2.20               | 10.28 | 10.28 | 10.28 | 3.48               | 12.35 | 11.69 | 13.76 | 3.46                  | 10.39 | 11.74 | 12.47 |
| d4T                  | ENF    | DRV/rb | 0.25               | 2.07 | 10.87 | 2.07               | 10.87 | 10.87 | 10.87 | 2.32               | 11.12 | 12.94 | 13.19 | 2.34                  | 11.08 | 10.97 | 12.09 |
| 3TCb                 | ETR    | ATV/r  | 2.30               | 6.31 | 7.44  | 6.31               | 7.44  | 8.00  | 8.00  | 8.61               | 9.75  | 13.75 | 16.05 | 6.86                  | 8.37  | 12.46 | 12.27 |
| EFV                  | RAL    | LPV/rb | 7.35               | 1.69 | 6.97  | 7.35               | 8.06  | 6.97  | 8.06  | 9.04               | 14.33 | 8.66  | 16.01 | 9.55                  | 13.88 | 9.20  | 17.20 |
| ABCq                 | EFV    | LPV/rq | 2.14               | 7.35 | 6.64  | 7.35               | 6.64  | 7.95  | 7.95  | 9.50               | 8.78  | 13.99 | 16.14 | 8.98                  | 7.79  | 13.56 | 14.32 |
| FTC                  | ddlq   | DRV/rq | 2.79               | 0.75 | 10.28 | 2.85               | 10.28 | 10.28 | 10.28 | 3.54               | 13.07 | 11.02 | 13.81 | 3.06                  | 11.67 | 10.64 | 11.94 |
| 3TCq                 | ETR    | ATV/r  | 2.35               | 6.31 | 7.44  | 6.31               | 7.44  | 8.00  | 8.00  | 8.65               | 9.79  | 13.75 | 16.10 | 6.87                  | 8.39  | 12.46 | 12.30 |
| ABCq                 | EVG/c  | DRV/rq | 2.14               | 1.41 | 10.28 | 2.20               | 10.28 | 10.28 | 10.28 | 3.56               | 12.42 | 11.69 | 13.83 | 3.62                  | 11.94 | 11.74 | 13.56 |
| d4T                  | ABCq   | DRV/rb | 0.25               | 2.14 | 10.87 | 2.14               | 10.87 | 10.87 | 10.87 | 2.39               | 11.12 | 13.01 | 13.26 | 2.65                  | 11.08 | 12.53 | 13.12 |
| ABCb                 | RAL    | DRV/rq | 1.91               | 1.69 | 10.28 | 2.10               | 10.28 | 10.28 | 10.28 | 3.60               | 12.19 | 11.96 | 13.88 | 3.45                  | 11.77 | 12.17 | 13.69 |
| ddlq                 | RAL    | DRV/rb | 0.75               | 1.69 | 10.87 | 1.83               | 10.87 | 10.87 | 10.87 | 2.43               | 11.61 | 12.55 | 13.30 | 2.38                  | 11.23 | 12.76 | 12.89 |
| AZTb                 | ENF    | DRV/rb | 0.37               | 2.07 | 10.87 | 2.07               | 10.87 | 10.87 | 10.87 | 2.44               | 11.23 | 12.94 | 13.30 | 2.51                  | 11.10 | 10.97 | 11.92 |
| FTC                  | ddlq   | DRV/rq | 2.79               | 0.84 | 10.28 | 2.86               | 10.28 | 10.28 | 10.28 | 3.63               | 13.07 | 11.12 | 13.91 | 3.10                  | 11.67 | 10.68 | 11.98 |
| AZTt                 | ENF    | DRV/rb | 0.39               | 2.07 | 10.87 | 2.07               | 10.87 | 10.87 | 10.87 | 2.46               | 11.26 | 12.94 | 13.33 | 2.54                  | 11.11 | 10.97 | 11.93 |
| FTC                  | TDF    | DRV/rq | 2.79               | 0.86 | 10.28 | 2.79               | 10.28 | 10.28 | 10.28 | 3.65               | 13.07 | 11.14 | 13.93 | 3.07                  | 11.67 | 10.66 | 11.94 |
| AZTb                 | ABCq   | DRV/rb | 0.37               | 2.14 | 10.87 | 2.14               | 10.87 | 10.87 | 10.87 | 2.51               | 11.23 | 13.01 | 13.38 | 3.07                  | 11.10 | 12.53 | 13.17 |
| 3TCb                 | EFV    | LPV/rq | 2.30               | 7.35 | 6.64  | 7.35               | 6.64  | 7.95  | 7.95  | 9.66               | 8.94  | 13.99 | 16.30 | 8.38                  | 7.77  | 13.56 | 13.61 |
| ddlq                 | RAL    | DRV/rb | 0.84               | 1.69 | 10.87 | 1.85               | 10.87 | 10.87 | 10.87 | 2.53               | 11.70 | 12.55 | 13.39 | 2.47                  | 11.27 | 12.76 | 12.97 |
| AZTt                 | ABCq   | DRV/rb | 0.39               | 2.14 | 10.87 | 2.14               | 10.87 | 10.87 | 10.87 | 2.54               | 11.26 | 13.01 | 13.40 | 3.13                  | 11.11 | 12.53 | 13.20 |
| 3TCb                 | EVG/c  | DRV/rq | 2.30               | 1.41 | 10.28 | 2.35               | 10.28 | 10.28 | 10.28 | 3.72               | 12.58 | 11.69 | 14.00 | 4.06                  | 11.71 | 11.74 | 13.59 |
| TDF                  | RAL    | DRV/rb | 0.86               | 1.69 | 10.87 | 1.69               | 10.87 | 10.87 | 10.87 | 2.55               | 11.73 | 12.55 | 13.41 | 2.71                  | 11.25 | 12.76 | 13.02 |
| d4T                  | 3TCb   | DRV/rb | 0.25               | 2.30 | 10.87 | 2.31               | 10.87 | 10.87 | 10.87 | 2.55               | 11.12 | 13.17 | 13.42 | 2.72                  | 11.08 | 12.30 | 13.01 |
| 3TCq                 | EFV    | LPV/rq | 2.35               | 7.35 | 6.64  | 7.35               | 6.64  | 7.95  | 7.95  | 9.70               | 8.99  | 13.99 | 16.34 | 8.40                  | 7.79  | 13.56 | 13.63 |
| ABCb                 | EFV    | LPV/rb | 1.91               | 7.35 | 6.97  | 7.35               | 6.97  | 8.06  | 8.06  | 9.27               | 8.89  | 14.33 | 16.24 | 8.81                  | 8.00  | 13.88 | 14.43 |

| Regimen <sup>a</sup> |        |        | HIV <sub>ave</sub> |      |       |                    |       |       |       |                    |       |       |       |                       |       |       |       |
|----------------------|--------|--------|--------------------|------|-------|--------------------|-------|-------|-------|--------------------|-------|-------|-------|-----------------------|-------|-------|-------|
|                      |        |        | Single drug        |      |       | Loewe <sup>b</sup> |       |       |       | Bliss <sup>c</sup> |       |       |       | DI Index <sup>d</sup> |       |       |       |
| Drug 1               | Drug 2 | Drug 3 | 1                  | 2    | 3     | 1,2                | 1,3   | 2,3   | 1,2,3 | 1,2                | 1,3   | 2,3   | 1,2,3 | 1,2                   | 1,3   | 2,3   | 1,2,3 |
| ENF                  | RAL    | DRV/rq | 2.07               | 1.69 | 10.28 | 2.29               | 10.28 | 10.28 | 10.28 | 3.76               | 12.35 | 11.96 | 14.03 | 3.96                  | 10.39 | 12.17 | 12.94 |
| ddIEC                | ETR    | ATV/r  | 2.56               | 6.31 | 7.44  | 6.33               | 7.45  | 8.00  | 8.01  | 8.87               | 10.00 | 13.75 | 16.31 | 6.24                  | 9.27  | 12.46 | 12.77 |
| 3TCq                 | EVG/c  | DRV/rq | 2.35               | 1.41 | 10.28 | 2.39               | 10.28 | 10.28 | 10.28 | 3.76               | 12.63 | 11.69 | 14.04 | 4.10                  | 11.74 | 11.74 | 13.63 |
| d4T                  | 3TCq   | DRV/rb | 0.25               | 2.35 | 10.87 | 2.35               | 10.87 | 10.87 | 10.87 | 2.60               | 11.12 | 13.22 | 13.46 | 2.77                  | 11.08 | 12.33 | 13.05 |
| ABCq                 | RAL    | DRV/rq | 2.14               | 1.69 | 10.28 | 2.26               | 10.28 | 10.28 | 10.28 | 3.83               | 12.42 | 11.96 | 14.11 | 3.68                  | 11.94 | 12.17 | 13.90 |
| ddlB                 | ABCb   | DRV/rb | 0.75               | 1.91 | 10.87 | 2.04               | 10.87 | 10.87 | 10.87 | 2.66               | 11.61 | 12.78 | 13.53 | 2.17                  | 11.23 | 12.35 | 12.47 |
| AZTb                 | 3TCb   | DRV/rb | 0.37               | 2.30 | 10.87 | 2.30               | 10.87 | 10.87 | 10.87 | 2.67               | 11.23 | 13.17 | 13.54 | 2.91                  | 11.10 | 12.30 | 12.84 |
| AZTt                 | 3TCb   | DRV/rb | 0.39               | 2.30 | 10.87 | 2.30               | 10.87 | 10.87 | 10.87 | 2.70               | 11.26 | 13.17 | 13.56 | 2.95                  | 11.11 | 12.30 | 12.86 |
| AZTb                 | 3TCq   | DRV/rb | 0.37               | 2.35 | 10.87 | 2.35               | 10.87 | 10.87 | 10.87 | 2.72               | 11.23 | 13.22 | 13.58 | 2.95                  | 11.10 | 12.33 | 12.88 |
| EFV                  | ENF    | LPV/rb | 7.35               | 2.07 | 6.97  | 7.35               | 8.06  | 6.98  | 8.06  | 9.42               | 14.33 | 9.04  | 16.40 | 9.20                  | 13.88 | 8.21  | 14.99 |
| AZTt                 | 3TCq   | DRV/rb | 0.39               | 2.35 | 10.87 | 2.35               | 10.87 | 10.87 | 10.87 | 2.74               | 11.26 | 13.22 | 13.61 | 2.99                  | 11.11 | 12.33 | 12.90 |
| ddlq                 | ABCb   | DRV/rb | 0.84               | 1.91 | 10.87 | 2.06               | 10.87 | 10.87 | 10.87 | 2.75               | 11.70 | 12.78 | 13.62 | 2.20                  | 11.27 | 12.35 | 12.52 |
| TDF                  | ABCb   | DRV/rb | 0.86               | 1.91 | 10.87 | 1.92               | 10.87 | 10.87 | 10.87 | 2.77               | 11.73 | 12.78 | 13.64 | 1.89                  | 11.25 | 12.35 | 12.45 |
| ddIEC                | EFV    | LPV/rq | 2.56               | 7.35 | 6.64  | 7.36               | 6.66  | 7.95  | 7.95  | 9.91               | 9.20  | 13.99 | 16.55 | 8.77                  | 8.55  | 13.56 | 14.58 |
| ABCq                 | EFV    | LPV/rb | 2.14               | 7.35 | 6.97  | 7.35               | 6.97  | 8.06  | 8.06  | 9.50               | 9.12  | 14.33 | 16.47 | 8.98                  | 8.13  | 13.88 | 14.60 |
| ddIEC                | EVG/c  | DRV/rq | 2.56               | 1.41 | 10.28 | 2.60               | 10.28 | 10.28 | 10.28 | 3.97               | 12.84 | 11.69 | 14.25 | 4.20                  | 11.52 | 11.74 | 13.56 |
| ABCb                 | ENF    | DRV/rq | 1.91               | 2.07 | 10.28 | 2.41               | 10.28 | 10.28 | 10.28 | 3.98               | 12.19 | 12.35 | 14.26 | 3.62                  | 11.77 | 10.39 | 12.21 |
| FTC                  | ETR    | ATV/r  | 2.79               | 6.31 | 7.44  | 6.31               | 7.44  | 8.00  | 8.00  | 9.10               | 10.23 | 13.75 | 16.54 | 6.83                  | 9.00  | 12.46 | 12.83 |
| d4T                  | ddIEC  | DRV/rb | 0.25               | 2.56 | 10.87 | 2.56               | 10.87 | 10.87 | 10.87 | 2.81               | 11.12 | 13.43 | 13.68 | 3.29                  | 11.08 | 12.11 | 13.54 |
| 3TCb                 | RAL    | DRV/rq | 2.30               | 1.69 | 10.28 | 2.39               | 10.28 | 10.28 | 10.28 | 3.99               | 12.58 | 11.96 | 14.27 | 4.00                  | 11.71 | 12.17 | 13.86 |
| ddlB                 | ENF    | DRV/rb | 0.75               | 2.07 | 10.87 | 2.24               | 10.87 | 10.87 | 10.87 | 2.82               | 11.61 | 12.94 | 13.68 | 2.71                  | 11.23 | 10.97 | 11.80 |
| EFV                  | EVG/c  | ATV/r  | 7.35               | 1.41 | 7.44  | 7.35               | 8.35  | 7.44  | 8.35  | 8.77               | 14.80 | 8.86  | 16.21 | 8.86                  | 13.12 | 9.57  | 16.71 |
| 3TCq                 | RAL    | DRV/rq | 2.35               | 1.69 | 10.28 | 2.44               | 10.28 | 10.28 | 10.28 | 4.04               | 12.63 | 11.96 | 14.31 | 4.04                  | 11.74 | 12.17 | 13.90 |
| ddlB                 | ABCq   | DRV/rb | 0.75               | 2.14 | 10.87 | 2.24               | 10.87 | 10.87 | 10.87 | 2.89               | 11.61 | 13.01 | 13.75 | 2.38                  | 11.23 | 12.53 | 12.60 |
| ddlq                 | ENF    | DRV/rb | 0.84               | 2.07 | 10.87 | 2.26               | 10.87 | 10.87 | 10.87 | 2.91               | 11.70 | 12.94 | 13.77 | 2.79                  | 11.27 | 10.97 | 11.84 |
| AZTb                 | ddIEC  | DRV/rb | 0.37               | 2.56 | 10.87 | 2.56               | 10.87 | 10.87 | 10.87 | 2.93               | 11.23 | 13.43 | 13.79 | 3.41                  | 11.10 | 12.11 | 13.14 |
| TDF                  | ENF    | DRV/rb | 0.86               | 2.07 | 10.87 | 2.08               | 10.87 | 10.87 | 10.87 | 2.93               | 11.73 | 12.94 | 13.80 | 2.63                  | 11.25 | 10.97 | 11.73 |
| AZTt                 | ddIEC  | DRV/rb | 0.39               | 2.56 | 10.87 | 2.56               | 10.87 | 10.87 | 10.87 | 2.95               | 11.26 | 13.43 | 13.82 | 3.46                  | 11.11 | 12.11 | 13.17 |
| 3TCb                 | EFV    | LPV/rb | 2.30               | 7.35 | 6.97  | 7.35               | 6.97  | 8.06  | 8.06  | 9.66               | 9.28  | 14.33 | 16.63 | 8.38                  | 8.10  | 13.88 | 13.87 |
| ddlq                 | ABCq   | DRV/rb | 0.84               | 2.14 | 10.87 | 2.25               | 10.87 | 10.87 | 10.87 | 2.98               | 11.70 | 13.01 | 13.85 | 2.41                  | 11.27 | 12.53 | 12.65 |
| FTC                  | EFV    | LPV/rq | 2.79               | 7.35 | 6.64  | 7.35               | 6.64  | 7.95  | 7.95  | 10.14              | 9.43  | 13.99 | 16.78 | 8.63                  | 8.38  | 13.56 | 14.24 |
| 3TCq                 | EFV    | LPV/rb | 2.35               | 7.35 | 6.97  | 7.35               | 6.97  | 8.06  | 8.06  | 9.70               | 9.32  | 14.33 | 16.68 | 8.40                  | 8.12  | 13.88 | 13.90 |
| TDF                  | ABCq   | DRV/rb | 0.86               | 2.14 | 10.87 | 2.14               | 10.87 | 10.87 | 10.87 | 3.00               | 11.73 | 13.01 | 13.87 | 2.11                  | 11.25 | 12.53 | 12.57 |
| FTC                  | EVG/c  | DRV/rq | 2.79               | 1.41 | 10.28 | 2.80               | 10.28 | 10.28 | 10.28 | 4.20               | 13.07 | 11.69 | 14.48 | 4.28                  | 11.67 | 11.74 | 13.69 |
| ABCq                 | ENF    | DRV/rq | 2.14               | 2.07 | 10.28 | 2.53               | 10.28 | 10.28 | 10.28 | 4.21               | 12.42 | 12.35 | 14.49 | 3.82                  | 11.94 | 10.39 | 12.33 |
| d4T                  | FTC    | DRV/rb | 0.25               | 2.79 | 10.87 | 2.79               | 10.87 | 10.87 | 10.87 | 3.04               | 11.12 | 13.66 | 13.91 | 3.21                  | 11.08 | 12.26 | 13.29 |
| 3TCb                 | ABCb   | DRV/rq | 2.30               | 1.91 | 10.28 | 2.47               | 10.28 | 10.28 | 10.28 | 4.22               | 12.58 | 12.19 | 14.50 | 2.82                  | 11.71 | 11.77 | 13.01 |
| 3TCb                 | ddlB   | DRV/rb | 2.30               | 0.75 | 10.87 | 2.39               | 10.87 | 10.87 | 10.87 | 3.05               | 13.17 | 11.61 | 13.92 | 2.55                  | 12.30 | 11.23 | 12.47 |
| ddIEC                | RAL    | DRV/rq | 2.56               | 1.69 | 10.28 | 2.66               | 10.28 | 10.28 | 10.28 | 4.25               | 12.84 | 11.96 | 14.52 | 4.11                  | 11.52 | 12.17 | 13.80 |
| 3TCq                 | ABCb   | DRV/rq | 2.35               | 1.91 | 10.28 | 2.51               | 10.28 | 10.28 | 10.28 | 4.26               | 12.63 | 12.19 | 14.54 | 2.86                  | 11.74 | 11.77 | 13.03 |
| 3TCq                 | ddlB   | DRV/rb | 2.35               | 0.75 | 10.87 | 2.44               | 10.87 | 10.87 | 10.87 | 3.10               | 13.22 | 11.61 | 13.96 | 2.59                  | 12.33 | 11.23 | 12.49 |
| EFV                  | RAL    | ATV/r  | 7.35               | 1.69 | 7.44  | 7.35               | 8.35  | 7.44  | 8.35  | 9.04               | 14.80 | 9.13  | 16.48 | 9.55                  | 13.12 | 10.00 | 17.64 |
| 3TCb                 | ddlq   | DRV/rb | 2.30               | 0.84 | 10.87 | 2.41               | 10.87 | 10.87 | 10.87 | 3.14               | 13.17 | 11.70 | 14.01 | 2.58                  | 12.30 | 11.27 | 12.52 |
| AZTb                 | FTC    | DRV/rb | 0.37               | 2.79 | 10.87 | 2.79               | 10.87 | 10.87 | 10.87 | 3.16               | 11.23 | 13.66 | 14.02 | 3.55                  | 11.10 | 12.26 | 13.27 |
| 3TCb                 | TDF    | DRV/rb | 2.30               | 0.86 | 10.87 | 2.30               | 10.87 | 10.87 | 10.87 | 3.16               | 13.17 | 11.73 | 14.03 | 2.97                  | 12.30 | 11.25 | 12.66 |
| AZTt                 | FTC    | DRV/rb | 0.39               | 2.79 | 10.87 | 2.79               | 10.87 | 10.87 | 10.87 | 3.18               | 11.26 | 13.66 | 14.05 | 3.60                  | 11.11 | 12.26 | 13.29 |
| 3TCq                 | ddlq   | DRV/rb | 2.35               | 0.84 | 10.87 | 2.45               | 10.87 | 10.87 | 10.87 | 3.19               | 13.22 | 11.70 | 14.05 | 2.62                  | 12.33 | 11.27 | 12.54 |
| 3TCb                 | ENF    | DRV/rq | 2.30               | 2.07 | 10.28 | 2.63               | 10.28 | 10.28 | 10.28 | 4.37               | 12.58 | 12.35 | 14.65 | 4.55                  | 11.71 | 10.39 | 12.39 |
| 3TCq                 | TDF    | DRV/rb | 2.35               | 0.86 | 10.87 | 2.35               | 10.87 | 10.87 | 10.87 | 3.21               | 13.22 | 11.73 | 14.07 | 3.02                  | 12.33 | 11.25 | 12.68 |
| ddIEC                | EFV    | LPV/rb | 2.56               | 7.35 | 6.97  | 7.36               | 6.99  | 8.06  | 8.06  | 9.91               | 9.53  | 14.33 | 16.89 | 8.77                  | 8.88  | 13.88 | 14.87 |
| 3TCq                 | ENF    | DRV/rq | 2.35               | 2.07 | 10.28 | 2.67               | 10.28 | 10.28 | 10.28 | 4.42               | 12.63 | 12.35 | 14.70 | 4.60                  | 11.74 | 10.39 | 12.42 |
| 3TCb                 | ABCq   | DRV/rq | 2.30               | 2.14 | 10.28 | 2.56               | 10.28 | 10.28 | 10.28 | 4.45               | 12.58 | 12.42 | 14.72 | 2.93                  | 11.71 | 11.94 | 13.15 |
| ddIEC                | ABCb   | DRV/rq | 2.56               | 1.91 | 10.28 | 2.74               | 10.28 | 10.28 | 10.28 | 4.47               | 12.84 | 12.19 | 14.75 | 3.11                  | 11.52 | 11.77 | 12.89 |
| FTC                  | RAL    | DRV/rq | 2.79               | 1.69 | 10.28 | 2.82               | 10.28 | 10.28 | 10.28 | 4.48               | 13.07 | 11.96 | 14.75 | 4.61                  | 11.67 | 12.17 | 14.13 |
| 3TCq                 | ABCq   | DRV/rq | 2.35               | 2.14 | 10.28 | 2.59               | 10.28 | 10.28 | 10.28 | 4.49               | 12.63 | 12.42 | 14.77 | 2.96                  | 11.74 | 11.94 | 13.18 |
| ABCb                 | EFV    | ATV/r  | 1.91               | 7.35 | 7.44  | 7.35               | 7.44  | 8.35  | 8.35  | 9.27               | 9.36  | 14.80 | 16.71 | 8.81                  | 8.49  | 13.12 | 14.14 |
| ABCb                 | EVG/c  | DRV/rb | 1.91               | 1.41 | 10.87 | 2.02               | 10.87 | 10.87 | 10.87 | 3.33               | 12.78 | 12.28 | 14.19 | 3.39                  | 12.35 | 12.33 | 13.94 |
| ddIEC                | TDF    | DRV/rb | 2.56               | 0.86 | 10.87 | 2.56               | 10.87 | 10.87 | 10.87 | 3.42               | 13.43 | 11.73 | 14.29 | 2.51                  | 12.11 | 11.25 | 12.29 |
| FTC                  | EFV    | LPV/rb | 2.79               | 7.35 | 6.97  | 7.35               | 6.97  | 8.06  | 8.06  | 10.14              | 9.76  | 14.33 | 17.12 | 8.63                  | 8.72  | 13.88 | 14.52 |
| ddIEC                | ENF    | DRV/rq | 2.56               | 2.07 | 10.28 | 2.94               | 10.28 | 10.28 | 10.28 | 4.63               | 12.84 | 12.35 | 14.91 | 4.33                  | 11.52 | 10.39 | 11.99 |
| EFV                  | ENF    | ATV/r  | 7.35               | 2.07 | 7.44  | 7.35               | 8.35  | 7.44  | 8.35  | 9.42               | 14.80 | 9.51  | 16.87 | 9.20                  | 13.12 | 9.12  | 15.20 |
| ENF                  | EVG/c  | DRV/rb | 2.07               | 1.41 | 10.87 | 2.20               | 10.87 | 10.87 | 10.87 | 3.48               | 12.94 | 12.28 | 14.35 | 3.46                  | 10.97 | 12.33 | 13.05 |
| d4T                  | NVP    | DRV/rq | 0.25               | 4.43 | 10.28 | 4.43               | 10.28 | 10.28 | 10.28 | 4.68               | 10.53 | 14.71 | 14.96 | 4.90                  | 10.50 | 12.19 | 14.28 |
| ddIEC                | ABCq   | DRV/rq | 2.56               | 2.14 | 10.28 | 2.82               | 10.28 | 10.28 | 10.28 | 4.70               | 12.84 | 12.42 | 14.98 | 3.21                  | 11.52 | 11.94 | 13.02 |
| FTC                  | ABCb   | DRV/rq | 2.79               | 1.91 | 10.28 | 2.86               | 10.28 | 10.28 | 10.28 | 4.70               | 13.07 | 12.19 | 14.98 | 2.92                  | 11.67 | 11.77 | 12.97 |
| FTC                  | ddlB   | DRV/rb | 2.79               | 0.75 | 10.87 | 2.85               | 10.87 | 10.87 | 10.87 | 3.54               | 13.66 | 11.61 | 14.40 | 3.06                  | 12.26 | 11.23 | 12.53 |
| ABCq                 | EFV    | ATV/r  | 2.14               | 7.35 | 7.44  | 7.35               | 7.44  | 8.35  | 8.35  | 9.50               | 9.59  | 14.80 | 16.94 | 8.98                  | 8.62  | 13.12 | 14.30 |
| ABCq                 | EVG/c  | DRV/rb | 2.14               | 1.41 | 10.87 | 2.20               | 10.87 | 10.87 | 10.87 | 3.56               | 13.01 | 12.28 | 14.42 | 3.62                  | 12.53 | 12.33 | 14.15 |
| ABCb                 | RAL    | DRV/rb | 1.91               | 1.69 | 10.87 | 2.10               | 10.87 | 10.87 | 10.87 | 3.60               | 12.78 | 12.55 | 14.47 | 3.45                  | 12.35 | 12.76 | 14.28 |
| FTC                  | ddlq   | DRV/rb | 2.79               | 0.84 | 10.87 | 2.86               | 10.87 | 10.87 | 10.87 | 3.63               | 13.66 | 11.70 | 14.49 | 3.10                  | 12.26 | 11.27 | 12.58 |

| Regimen <sup>a</sup> |        |        | HIV <sub>ave</sub> |      |       |                    |       |       |       |                    |       |       |       |                       |       |       |       |
|----------------------|--------|--------|--------------------|------|-------|--------------------|-------|-------|-------|--------------------|-------|-------|-------|-----------------------|-------|-------|-------|
|                      |        |        | Single drug        |      |       | Loewe <sup>b</sup> |       |       |       | Bliss <sup>c</sup> |       |       |       | DI Index <sup>d</sup> |       |       |       |
| Drug 1               | Drug 2 | Drug 3 | 1                  | 2    | 3     | 1,2                | 1,3   | 2,3   | 1,2,3 | 1,2                | 1,3   | 2,3   | 1,2,3 | 1,2                   | 1,3   | 2,3   | 1,2,3 |
| AZTb                 | NVP    | DRV/rq | 0.37               | 4.43 | 10.28 | 4.43               | 10.28 | 10.28 | 10.28 | 4.80               | 10.64 | 14.71 | 15.08 | 5.28                  | 10.51 | 12.19 | 14.39 |
| FTC                  | TDF    | DRV/rb | 2.79               | 0.86 | 10.87 | 2.79               | 10.87 | 10.87 | 10.87 | 3.65               | 13.66 | 11.73 | 14.52 | 3.07                  | 12.26 | 11.25 | 12.53 |
| AZTt                 | NVP    | DRV/rq | 0.39               | 4.43 | 10.28 | 4.43               | 10.28 | 10.28 | 10.28 | 4.83               | 10.67 | 14.71 | 15.10 | 5.33                  | 10.52 | 12.19 | 14.43 |
| FTC                  | ENF    | DRV/rq | 2.79               | 2.07 | 10.28 | 2.99               | 10.28 | 10.28 | 10.28 | 4.86               | 13.07 | 12.35 | 15.14 | 4.39                  | 11.67 | 10.39 | 12.05 |
| 3TCb                 | ddIEC  | DRV/rq | 2.30               | 2.56 | 10.28 | 2.91               | 10.28 | 10.28 | 10.28 | 4.86               | 12.58 | 12.84 | 15.14 | 3.38                  | 11.71 | 11.52 | 12.78 |
| 3TCb                 | EFV    | ATV/r  | 2.30               | 7.35 | 7.44  | 7.35               | 7.44  | 8.35  | 8.35  | 9.66               | 9.75  | 14.80 | 17.10 | 8.38                  | 8.37  | 13.12 | 13.28 |
| 3TCb                 | EVG/c  | DRV/rb | 2.30               | 1.41 | 10.87 | 2.35               | 10.87 | 10.87 | 10.87 | 3.72               | 13.17 | 12.28 | 14.59 | 4.06                  | 12.30 | 12.33 | 14.17 |
| 3TCq                 | ddIEC  | DRV/rq | 2.35               | 2.56 | 10.28 | 2.92               | 10.28 | 10.28 | 10.28 | 4.91               | 12.63 | 12.84 | 15.19 | 3.40                  | 11.74 | 11.52 | 12.81 |
| FTC                  | ABCq   | DRV/rq | 2.79               | 2.14 | 10.28 | 2.90               | 10.28 | 10.28 | 10.28 | 4.93               | 13.07 | 12.42 | 15.21 | 2.97                  | 11.67 | 11.94 | 13.10 |
| ENF                  | RAL    | DRV/rb | 2.07               | 1.69 | 10.87 | 2.29               | 10.87 | 10.87 | 10.87 | 3.76               | 12.94 | 12.55 | 14.62 | 3.96                  | 10.97 | 12.76 | 13.51 |
| 3TCq                 | EFV    | ATV/r  | 2.35               | 7.35 | 7.44  | 7.35               | 7.44  | 8.35  | 8.35  | 9.70               | 9.79  | 14.80 | 17.15 | 8.40                  | 8.39  | 13.12 | 13.30 |
| 3TCq                 | EVG/c  | DRV/rb | 2.35               | 1.41 | 10.87 | 2.39               | 10.87 | 10.87 | 10.87 | 3.76               | 13.22 | 12.28 | 14.63 | 4.10                  | 12.33 | 12.33 | 14.21 |
| ABCq                 | RAL    | DRV/rb | 2.14               | 1.69 | 10.87 | 2.26               | 10.87 | 10.87 | 10.87 | 3.83               | 13.01 | 12.55 | 14.70 | 3.68                  | 12.53 | 12.76 | 14.49 |
| ddIEC                | EVG/c  | DRV/rb | 2.56               | 1.41 | 10.87 | 2.60               | 10.87 | 10.87 | 10.87 | 3.97               | 13.43 | 12.28 | 14.84 | 4.20                  | 12.11 | 12.33 | 14.14 |
| ddIEC                | EFV    | ATV/r  | 2.56               | 7.35 | 7.44  | 7.36               | 7.45  | 8.35  | 8.35  | 9.91               | 10.00 | 14.80 | 17.36 | 8.77                  | 9.27  | 13.12 | 14.47 |
| ABCb                 | ENF    | DRV/rb | 1.91               | 2.07 | 10.87 | 2.41               | 10.87 | 10.87 | 10.87 | 3.98               | 12.78 | 12.94 | 14.85 | 3.62                  | 12.35 | 10.97 | 12.78 |
| 3TCb                 | RAL    | DRV/rb | 2.30               | 1.69 | 10.87 | 2.39               | 10.87 | 10.87 | 10.87 | 3.99               | 13.17 | 12.55 | 14.86 | 4.00                  | 12.30 | 12.76 | 14.44 |
| ddlB                 | NVP    | DRV/rq | 0.75               | 4.43 | 10.28 | 4.45               | 10.28 | 10.28 | 10.28 | 5.18               | 11.02 | 14.71 | 15.46 | 5.05                  | 10.64 | 12.19 | 12.98 |
| 3TCq                 | RAL    | DRV/rb | 2.35               | 1.69 | 10.87 | 2.44               | 10.87 | 10.87 | 10.87 | 4.04               | 13.22 | 12.55 | 14.90 | 4.04                  | 12.33 | 12.76 | 14.48 |
| ddlq                 | NVP    | DRV/rq | 0.84               | 4.43 | 10.28 | 4.46               | 10.28 | 10.28 | 10.28 | 5.27               | 11.12 | 14.71 | 15.55 | 5.12                  | 10.68 | 12.19 | 13.03 |
| TDF                  | NVP    | DRV/rq | 0.86               | 4.43 | 10.28 | 4.43               | 10.28 | 10.28 | 10.28 | 5.29               | 11.14 | 14.71 | 15.57 | 5.32                  | 10.66 | 12.19 | 13.19 |
| FTC                  | ddIEC  | DRV/rq | 2.79               | 2.56 | 10.28 | 3.19               | 10.28 | 10.28 | 10.28 | 5.35               | 13.07 | 12.84 | 15.63 | 3.86                  | 11.67 | 11.52 | 12.77 |
| FTC                  | EFV    | ATV/r  | 2.79               | 7.35 | 7.44  | 7.35               | 7.44  | 8.35  | 8.35  | 10.14              | 10.23 | 14.80 | 17.59 | 8.63                  | 9.00  | 13.12 | 13.97 |
| FTC                  | EVG/c  | DRV/rb | 2.79               | 1.41 | 10.87 | 2.80               | 10.87 | 10.87 | 10.87 | 4.20               | 13.66 | 12.28 | 15.07 | 4.28                  | 12.26 | 12.33 | 14.28 |
| ABCq                 | ENF    | DRV/rb | 2.14               | 2.07 | 10.87 | 2.53               | 10.87 | 10.87 | 10.87 | 4.21               | 13.01 | 12.94 | 15.08 | 3.82                  | 12.53 | 10.97 | 12.91 |
| 3TCb                 | ABCb   | DRV/rb | 2.30               | 1.91 | 10.87 | 2.47               | 10.87 | 10.87 | 10.87 | 4.22               | 13.17 | 12.78 | 15.08 | 2.82                  | 12.30 | 12.35 | 13.60 |
| ddIEC                | RAL    | DRV/rb | 2.56               | 1.69 | 10.87 | 2.66               | 10.87 | 10.87 | 10.87 | 4.25               | 13.43 | 12.55 | 15.11 | 4.11                  | 12.11 | 12.76 | 14.38 |
| 3TCq                 | ABCb   | DRV/rb | 2.35               | 1.91 | 10.87 | 2.51               | 10.87 | 10.87 | 10.87 | 4.26               | 13.22 | 12.78 | 15.13 | 2.86                  | 12.33 | 12.35 | 13.63 |
| 3TCb                 | ENF    | DRV/rb | 2.30               | 2.07 | 10.87 | 2.63               | 10.87 | 10.87 | 10.87 | 4.37               | 13.17 | 12.94 | 15.24 | 4.55                  | 12.30 | 10.97 | 12.95 |
| 3TCq                 | ENF    | DRV/rb | 2.35               | 2.07 | 10.87 | 2.67               | 10.87 | 10.87 | 10.87 | 4.42               | 13.22 | 12.94 | 15.29 | 4.60                  | 12.33 | 10.97 | 12.98 |
| 3TCb                 | ABCq   | DRV/rb | 2.30               | 2.14 | 10.87 | 2.56               | 10.87 | 10.87 | 10.87 | 4.45               | 13.17 | 13.01 | 15.31 | 2.93                  | 12.30 | 12.53 | 13.75 |
| ddIEC                | ABCb   | DRV/rb | 2.56               | 1.91 | 10.87 | 2.74               | 10.87 | 10.87 | 10.87 | 4.47               | 13.43 | 12.78 | 15.34 | 3.11                  | 12.11 | 12.35 | 13.48 |
| FTC                  | RAL    | DRV/rb | 2.79               | 1.69 | 10.87 | 2.82               | 10.87 | 10.87 | 10.87 | 4.48               | 13.66 | 12.55 | 15.34 | 4.61                  | 12.26 | 12.76 | 14.71 |
| 3TCq                 | ABCq   | DRV/rb | 2.35               | 2.14 | 10.87 | 2.59               | 10.87 | 10.87 | 10.87 | 4.49               | 13.22 | 13.01 | 15.36 | 2.96                  | 12.33 | 12.53 | 13.77 |
| ddIEC                | ENF    | DRV/rb | 2.56               | 2.07 | 10.87 | 2.94               | 10.87 | 10.87 | 10.87 | 4.63               | 13.43 | 12.94 | 15.50 | 4.33                  | 12.11 | 10.97 | 12.56 |
| NVP                  | EVG/c  | DRV/rq | 4.43               | 1.41 | 10.28 | 4.43               | 10.28 | 10.28 | 10.28 | 5.85               | 14.71 | 11.69 | 16.12 | 7.01                  | 12.19 | 11.74 | 15.98 |
| d4T                  | NVP    | DRV/rb | 0.25               | 4.43 | 10.87 | 4.43               | 10.87 | 10.87 | 10.87 | 4.68               | 11.12 | 15.30 | 15.55 | 4.90                  | 11.08 | 12.77 | 14.83 |
| ddIEC                | ABCq   | DRV/rb | 2.56               | 2.14 | 10.87 | 2.82               | 10.87 | 10.87 | 10.87 | 4.70               | 13.43 | 13.01 | 15.57 | 3.21                  | 12.11 | 12.53 | 13.62 |
| FTC                  | ABCb   | DRV/rb | 2.79               | 1.91 | 10.87 | 2.86               | 10.87 | 10.87 | 10.87 | 4.70               | 13.66 | 12.78 | 15.57 | 2.92                  | 12.26 | 12.35 | 13.57 |
| AZTb                 | NVP    | DRV/rb | 0.37               | 4.43 | 10.87 | 4.43               | 10.87 | 10.87 | 10.87 | 4.80               | 11.23 | 15.30 | 15.67 | 5.28                  | 11.10 | 12.77 | 14.92 |
| AZTt                 | NVP    | DRV/rb | 0.39               | 4.43 | 10.87 | 4.43               | 10.87 | 10.87 | 10.87 | 4.83               | 11.26 | 15.30 | 15.69 | 5.33                  | 11.11 | 12.77 | 14.96 |
| FTC                  | ENF    | DRV/rb | 2.79               | 2.07 | 10.87 | 2.99               | 10.87 | 10.87 | 10.87 | 4.86               | 13.66 | 12.94 | 15.73 | 4.39                  | 12.26 | 10.97 | 12.62 |
| 3TCb                 | ddIEC  | DRV/rb | 2.30               | 2.56 | 10.87 | 2.91               | 10.87 | 10.87 | 10.87 | 4.86               | 13.17 | 13.43 | 15.73 | 3.38                  | 12.30 | 12.11 | 13.38 |
| 3TCq                 | ddIEC  | DRV/rb | 2.35               | 2.56 | 10.87 | 2.92               | 10.87 | 10.87 | 10.87 | 4.91               | 13.22 | 13.43 | 15.78 | 3.40                  | 12.33 | 12.11 | 13.40 |
| FTC                  | ABCq   | DRV/rb | 2.79               | 2.14 | 10.87 | 2.90               | 10.87 | 10.87 | 10.87 | 4.93               | 13.66 | 13.01 | 15.80 | 2.97                  | 12.26 | 12.53 | 13.70 |
| NVP                  | RAL    | DRV/rq | 4.43               | 1.69 | 10.28 | 4.43               | 10.28 | 10.28 | 10.28 | 6.12               | 14.71 | 11.96 | 16.40 | 6.36                  | 12.19 | 12.17 | 15.50 |
| ABCb                 | NVP    | DRV/rq | 1.91               | 4.43 | 10.28 | 4.44               | 10.28 | 10.28 | 10.28 | 6.35               | 12.19 | 14.71 | 16.62 | 5.63                  | 11.77 | 12.19 | 14.12 |
| ddlB                 | NVP    | DRV/rb | 0.75               | 4.43 | 10.87 | 4.45               | 10.87 | 10.87 | 10.87 | 5.18               | 11.61 | 15.30 | 16.04 | 5.05                  | 11.23 | 12.77 | 13.55 |
| ddlq                 | NVP    | DRV/rb | 0.84               | 4.43 | 10.87 | 4.46               | 10.87 | 10.87 | 10.87 | 5.27               | 11.70 | 15.30 | 16.14 | 5.12                  | 11.27 | 12.77 | 13.61 |
| TDF                  | NVP    | DRV/rb | 0.86               | 4.43 | 10.87 | 4.43               | 10.87 | 10.87 | 10.87 | 5.29               | 11.73 | 15.30 | 16.16 | 5.32                  | 11.25 | 12.77 | 13.75 |
| NVP                  | ENF    | DRV/rq | 4.43               | 2.07 | 10.28 | 4.47               | 10.28 | 10.28 | 10.28 | 6.50               | 14.71 | 12.35 | 16.78 | 6.17                  | 12.19 | 10.39 | 12.76 |
| FTC                  | ddIEC  | DRV/rb | 2.79               | 2.56 | 10.87 | 3.19               | 10.87 | 10.87 | 10.87 | 5.35               | 13.66 | 13.43 | 16.22 | 3.86                  | 12.26 | 12.11 | 13.37 |
| ABCq                 | NVP    | DRV/rq | 2.14               | 4.43 | 10.28 | 4.44               | 10.28 | 10.28 | 10.28 | 6.58               | 12.42 | 14.71 | 16.85 | 5.77                  | 11.94 | 12.19 | 14.27 |
| d4T                  | ETR    | DRV/rq | 0.25               | 6.31 | 10.28 | 6.30               | 10.28 | 10.36 | 10.36 | 6.55               | 10.53 | 16.58 | 16.83 | 6.75                  | 10.50 | 16.55 | 17.60 |
| 3TCb                 | NVP    | DRV/rq | 2.30               | 4.43 | 10.28 | 4.45               | 10.28 | 10.28 | 10.28 | 6.74               | 12.58 | 14.71 | 17.01 | 5.71                  | 11.71 | 12.19 | 13.85 |
| AZTb                 | ETR    | DRV/rq | 0.37               | 6.31 | 10.28 | 6.30               | 10.28 | 10.36 | 10.36 | 6.67               | 10.64 | 16.58 | 16.95 | 7.69                  | 10.51 | 16.55 | 20.21 |
| AZTt                 | ETR    | DRV/rq | 0.39               | 6.31 | 10.28 | 6.30               | 10.28 | 10.36 | 10.36 | 6.70               | 10.67 | 16.58 | 16.98 | 7.78                  | 10.52 | 16.55 | 20.28 |
| 3TCq                 | NVP    | DRV/rq | 2.35               | 4.43 | 10.28 | 4.45               | 10.28 | 10.28 | 10.28 | 6.78               | 12.63 | 14.71 | 17.06 | 5.74                  | 11.74 | 12.19 | 13.88 |
| ddIEC                | NVP    | DRV/rq | 2.56               | 4.43 | 10.28 | 4.57               | 10.28 | 10.28 | 10.28 | 6.99               | 12.84 | 14.71 | 17.27 | 6.55                  | 11.52 | 12.19 | 14.02 |
| NVP                  | EVG/c  | DRV/rb | 4.43               | 1.41 | 10.87 | 4.43               | 10.87 | 10.87 | 10.87 | 5.85               | 15.30 | 12.28 | 16.71 | 7.01                  | 12.77 | 12.33 | 16.52 |
| ddlB                 | ETR    | DRV/rq | 0.75               | 6.31 | 10.28 | 6.31               | 10.28 | 10.36 | 10.36 | 7.05               | 11.02 | 16.58 | 17.33 | 6.28                  | 10.64 | 16.55 | 14.82 |
| FTC                  | NVP    | DRV/rq | 2.79               | 4.43 | 10.28 | 4.48               | 10.28 | 10.28 | 10.28 | 7.22               | 13.07 | 14.71 | 17.50 | 6.21                  | 11.67 | 12.19 | 13.88 |
| ddlq                 | ETR    | DRV/rq | 0.84               | 6.31 | 10.28 | 6.31               | 10.28 | 10.36 | 10.36 | 7.14               | 11.12 | 16.58 | 17.42 | 6.28                  | 10.68 | 16.55 | 14.87 |
| TDF                  | ETR    | DRV/rq | 0.86               | 6.31 | 10.28 | 6.30               | 10.28 | 10.36 | 10.36 | 7.16               | 11.14 | 16.58 | 17.44 | 6.44                  | 10.66 | 16.55 | 15.04 |
| NVP                  | RAL    | DRV/rb | 4.43               | 1.69 | 10.87 | 4.43               | 10.87 | 10.87 | 10.87 | 6.12               | 15.30 | 12.55 | 16.99 | 6.36                  | 12.77 | 12.76 | 16.07 |
| ABCb                 | NVP    | DRV/rb | 1.91               | 4.43 | 10.87 | 4.44               | 10.87 | 10.87 | 10.87 | 6.35               | 12.78 | 15.30 | 17.21 | 5.63                  | 12.35 | 12.77 | 14.71 |
| NVP                  | ENF    | DRV/rb | 4.43               | 2.07 | 10.87 | 4.47               | 10.87 | 10.87 | 10.87 | 6.50               | 15.30 | 12.94 | 17.37 | 6.17                  | 12.77 | 10.97 | 13.31 |
| d4T                  | EFV    | DRV/rq | 0.25               | 7.35 | 10.28 | 7.35               | 10.28 | 10.41 | 10.41 | 7.60               | 10.53 | 17.63 | 17.88 | 8.00                  | 10.50 | 15.46 | 19.41 |
| ABCq                 | NVP    | DRV/rb | 2.14               | 4.43 | 10.87 | 4.44               | 10.87 | 10.87 | 10.87 | 6.58               | 13.01 | 15.30 | 17.44 | 5.77                  | 12.53 | 12.77 | 14.85 |
| d4T                  | ETR    | DRV/rb | 0.25               | 6.31 | 10.87 | 6.30               | 10.87 | 10.92 | 10.92 | 6.55               | 11.12 | 17.17 | 17.42 | 6.75                  | 11.08 | 17.14 | 18.15 |

| Regimen <sup>a</sup> |        |        | HIV <sub>ave</sub> |      |       |                    |       |       |       |                    |       |       |       |                       |       |       |       |
|----------------------|--------|--------|--------------------|------|-------|--------------------|-------|-------|-------|--------------------|-------|-------|-------|-----------------------|-------|-------|-------|
|                      |        |        | Single drug        |      |       | Loewe <sup>b</sup> |       |       |       | Bliss <sup>c</sup> |       |       |       | DI Index <sup>d</sup> |       |       |       |
| Drug 1               | Drug 2 | Drug 3 | 1                  | 2    | 3     | 1,2                | 1,3   | 2,3   | 1,2,3 | 1,2                | 1,3   | 2,3   | 1,2,3 | 1,2                   | 1,3   | 2,3   | 1,2,3 |
| ETR                  | EVG/c  | DRV/rq | 6.31               | 1.41 | 10.28 | 6.30               | 10.36 | 10.28 | 10.36 | 7.72               | 16.58 | 11.69 | 18.00 | 7.55                  | 16.55 | 11.74 | 17.87 |
| AZTb                 | EFV    | DRV/rq | 0.37               | 7.35 | 10.28 | 7.35               | 10.28 | 10.41 | 10.41 | 7.72               | 10.64 | 17.63 | 18.00 | 8.91                  | 10.51 | 15.46 | 22.41 |
| AZTt                 | EFV    | DRV/rq | 0.39               | 7.35 | 10.28 | 7.35               | 10.28 | 10.41 | 10.41 | 7.75               | 10.67 | 17.63 | 18.02 | 9.02                  | 10.52 | 15.46 | 22.51 |
| AZTb                 | ETR    | DRV/rb | 0.37               | 6.31 | 10.87 | 6.30               | 10.87 | 10.92 | 10.92 | 6.67               | 11.23 | 17.17 | 17.54 | 7.69                  | 11.10 | 17.14 | 20.66 |
| 3TCb                 | NVP    | DRV/rb | 2.30               | 4.43 | 10.87 | 4.45               | 10.87 | 10.87 | 10.87 | 6.74               | 13.17 | 15.30 | 17.60 | 5.71                  | 12.30 | 12.77 | 14.44 |
| AZTt                 | ETR    | DRV/rb | 0.39               | 6.31 | 10.87 | 6.30               | 10.87 | 10.92 | 10.92 | 6.70               | 11.26 | 17.17 | 17.56 | 7.78                  | 11.11 | 17.14 | 20.74 |
| 3TCq                 | NVP    | DRV/rb | 2.35               | 4.43 | 10.87 | 4.45               | 10.87 | 10.87 | 10.87 | 6.78               | 13.22 | 15.30 | 17.65 | 5.74                  | 12.33 | 12.77 | 14.46 |
| ETR                  | RAL    | DRV/rq | 6.31               | 1.69 | 10.28 | 6.30               | 10.36 | 10.28 | 10.36 | 7.99               | 16.58 | 11.96 | 18.27 | 7.73                  | 16.55 | 12.17 | 18.31 |
| ddIEC                | NVP    | DRV/rb | 2.56               | 4.43 | 10.87 | 4.57               | 10.87 | 10.87 | 10.87 | 6.99               | 13.43 | 15.30 | 17.86 | 6.55                  | 12.11 | 12.77 | 14.59 |
| ddlB                 | EFV    | DRV/rq | 0.75               | 7.35 | 10.28 | 7.35               | 10.28 | 10.41 | 10.41 | 8.10               | 11.02 | 17.63 | 18.38 | 7.77                  | 10.64 | 15.46 | 15.18 |
| ddlB                 | ETR    | DRV/rb | 0.75               | 6.31 | 10.87 | 6.31               | 10.87 | 10.92 | 10.92 | 7.05               | 11.61 | 17.17 | 17.92 | 6.28                  | 11.23 | 17.14 | 15.42 |
| ABCb                 | ETR    | DRV/rq | 1.91               | 6.31 | 10.28 | 6.31               | 10.28 | 10.36 | 10.36 | 8.22               | 12.19 | 16.58 | 18.50 | 6.62                  | 11.77 | 16.55 | 16.58 |
| ddlq                 | EFV    | DRV/rq | 0.84               | 7.35 | 10.28 | 7.36               | 10.28 | 10.41 | 10.41 | 8.19               | 11.12 | 17.63 | 18.47 | 7.82                  | 10.68 | 15.46 | 15.23 |
| TDF                  | EFV    | DRV/rq | 0.86               | 7.35 | 10.28 | 7.35               | 10.28 | 10.41 | 10.41 | 8.21               | 11.14 | 17.63 | 18.49 | 7.97                  | 10.66 | 15.46 | 15.45 |
| ddlq                 | ETR    | DRV/rb | 0.84               | 6.31 | 10.87 | 6.31               | 10.87 | 10.92 | 10.92 | 7.14               | 11.70 | 17.17 | 18.01 | 6.28                  | 11.27 | 17.14 | 15.47 |
| TDF                  | ETR    | DRV/rb | 0.86               | 6.31 | 10.87 | 6.30               | 10.87 | 10.92 | 10.92 | 7.16               | 11.73 | 17.17 | 18.03 | 6.44                  | 11.25 | 17.14 | 15.63 |
| FTC                  | NVP    | DRV/rb | 2.79               | 4.43 | 10.87 | 4.48               | 10.87 | 10.87 | 10.87 | 7.22               | 13.66 | 15.30 | 18.09 | 6.21                  | 12.26 | 12.77 | 14.46 |
| ETR                  | ENF    | DRV/rq | 6.31               | 2.07 | 10.28 | 6.31               | 10.36 | 10.28 | 10.36 | 8.38               | 16.58 | 12.35 | 18.65 | 8.20                  | 16.55 | 10.39 | 16.15 |
| ABCq                 | ETR    | DRV/rq | 2.14               | 6.31 | 10.28 | 6.31               | 10.28 | 10.36 | 10.36 | 8.45               | 12.42 | 16.58 | 18.73 | 6.66                  | 11.94 | 16.55 | 16.75 |
| 3TCb                 | ETR    | DRV/rq | 2.30               | 6.31 | 10.28 | 6.31               | 10.28 | 10.36 | 10.36 | 8.61               | 12.58 | 16.58 | 18.89 | 6.86                  | 11.71 | 16.55 | 16.53 |
| 3TCq                 | ETR    | DRV/rq | 2.35               | 6.31 | 10.28 | 6.31               | 10.28 | 10.36 | 10.36 | 8.65               | 12.63 | 16.58 | 18.93 | 6.87                  | 11.74 | 16.55 | 16.56 |
| d4T                  | EFV    | DRV/rb | 0.25               | 7.35 | 10.87 | 7.35               | 10.87 | 10.94 | 10.94 | 7.60               | 11.12 | 18.22 | 18.47 | 8.00                  | 11.08 | 16.03 | 19.90 |
| EFV                  | EVG/c  | DRV/rq | 7.35               | 1.41 | 10.28 | 7.35               | 10.41 | 10.28 | 10.41 | 8.77               | 17.63 | 11.69 | 19.05 | 8.86                  | 15.46 | 11.74 | 18.17 |
| ETR                  | EVG/c  | DRV/rb | 6.31               | 1.41 | 10.87 | 6.30               | 10.92 | 10.87 | 10.92 | 7.72               | 17.17 | 12.28 | 18.59 | 7.55                  | 17.14 | 12.33 | 18.47 |
| ddIEC                | ETR    | DRV/rq | 2.56               | 6.31 | 10.28 | 6.33               | 10.28 | 10.36 | 10.36 | 8.87               | 12.84 | 16.58 | 19.14 | 6.24                  | 11.52 | 16.55 | 15.95 |
| AZTb                 | EFV    | DRV/rb | 0.37               | 7.35 | 10.87 | 7.35               | 10.87 | 10.94 | 10.94 | 7.72               | 11.23 | 18.22 | 18.59 | 8.91                  | 11.10 | 16.03 | 22.80 |
| AZTt                 | EFV    | DRV/rb | 0.39               | 7.35 | 10.87 | 7.35               | 10.87 | 10.94 | 10.94 | 7.75               | 11.26 | 18.22 | 18.61 | 9.02                  | 11.11 | 16.03 | 22.90 |
| EFV                  | RAL    | DRV/rq | 7.35               | 1.69 | 10.28 | 7.35               | 10.41 | 10.28 | 10.41 | 9.04               | 17.63 | 11.96 | 19.32 | 9.55                  | 15.46 | 12.17 | 19.27 |
| FTC                  | ETR    | DRV/rq | 2.79               | 6.31 | 10.28 | 6.31               | 10.28 | 10.36 | 10.36 | 9.10               | 13.07 | 16.58 | 19.37 | 6.83                  | 11.67 | 16.55 | 16.42 |
| ETR                  | RAL    | DRV/rb | 6.31               | 1.69 | 10.87 | 6.30               | 10.92 | 10.87 | 10.92 | 7.99               | 17.17 | 12.55 | 18.86 | 7.73                  | 17.14 | 12.76 | 18.92 |
| ddlB                 | EFV    | DRV/rb | 0.75               | 7.35 | 10.87 | 7.35               | 10.87 | 10.94 | 10.94 | 8.10               | 11.61 | 18.22 | 18.97 | 7.77                  | 11.23 | 16.03 | 15.74 |
| ABCb                 | EFV    | DRV/rq | 1.91               | 7.35 | 10.28 | 7.35               | 10.28 | 10.41 | 10.41 | 9.27               | 12.19 | 17.63 | 19.54 | 8.81                  | 11.77 | 15.46 | 17.17 |
| ddlq                 | EFV    | DRV/rb | 0.84               | 7.35 | 10.87 | 7.36               | 10.87 | 10.94 | 10.94 | 8.19               | 11.70 | 18.22 | 19.06 | 7.82                  | 11.27 | 16.03 | 15.80 |
| ABCb                 | ETR    | DRV/rb | 1.91               | 6.31 | 10.87 | 6.31               | 10.87 | 10.92 | 10.92 | 8.22               | 12.78 | 17.17 | 19.09 | 6.62                  | 12.35 | 17.14 | 17.19 |
| TDF                  | EFV    | DRV/rb | 0.86               | 7.35 | 10.87 | 7.35               | 10.87 | 10.94 | 10.94 | 8.21               | 11.73 | 18.22 | 19.08 | 7.97                  | 11.25 | 16.03 | 16.00 |
| EFV                  | ENF    | DRV/rq | 7.35               | 2.07 | 10.28 | 7.35               | 10.41 | 10.28 | 10.41 | 9.42               | 17.63 | 12.35 | 19.70 | 9.20                  | 15.46 | 10.39 | 15.60 |
| ETR                  | ENF    | DRV/rb | 6.31               | 2.07 | 10.87 | 6.31               | 10.92 | 10.87 | 10.92 | 8.38               | 17.17 | 12.94 | 19.24 | 8.20                  | 17.14 | 10.97 | 16.68 |
| ABCq                 | EFV    | DRV/rq | 2.14               | 7.35 | 10.28 | 7.35               | 10.28 | 10.41 | 10.41 | 9.50               | 12.42 | 17.63 | 19.77 | 8.98                  | 11.94 | 15.46 | 17.34 |
| ABCq                 | ETR    | DRV/rb | 2.14               | 6.31 | 10.87 | 6.31               | 10.87 | 10.92 | 10.92 | 8.45               | 13.01 | 17.17 | 19.31 | 6.66                  | 12.53 | 17.14 | 17.36 |
| 3TCb                 | EFV    | DRV/rq | 2.30               | 7.35 | 10.28 | 7.35               | 10.28 | 10.41 | 10.41 | 9.66               | 12.58 | 17.63 | 19.94 | 8.38                  | 11.71 | 15.46 | 16.27 |
| 3TCq                 | EFV    | DRV/rq | 2.35               | 7.35 | 10.28 | 7.35               | 10.28 | 10.41 | 10.41 | 9.70               | 12.63 | 17.63 | 19.98 | 8.40                  | 11.74 | 15.46 | 16.29 |
| 3TCb                 | ETR    | DRV/rb | 2.30               | 6.31 | 10.87 | 6.31               | 10.87 | 10.92 | 10.92 | 8.61               | 13.17 | 17.17 | 19.48 | 6.86                  | 12.30 | 17.14 | 17.13 |
| 3TCq                 | ETR    | DRV/rb | 2.35               | 6.31 | 10.87 | 6.31               | 10.87 | 10.92 | 10.92 | 8.65               | 13.22 | 17.17 | 19.52 | 6.87                  | 12.33 | 17.14 | 17.16 |
| EFV                  | EVG/c  | DRV/rb | 7.35               | 1.41 | 10.87 | 7.35               | 10.94 | 10.87 | 10.94 | 8.77               | 18.22 | 12.28 | 19.63 | 8.86                  | 16.03 | 12.33 | 18.75 |
| ddIEC                | EFV    | DRV/rq | 2.56               | 7.35 | 10.28 | 7.36               | 10.28 | 10.41 | 10.41 | 9.91               | 12.84 | 17.63 | 20.19 | 8.77                  | 11.52 | 15.46 | 16.22 |
| ddIEC                | ETR    | DRV/rb | 2.56               | 6.31 | 10.87 | 6.33               | 10.87 | 10.92 | 10.92 | 8.87               | 13.43 | 17.17 | 19.73 | 6.24                  | 12.11 | 17.14 | 16.55 |
| FTC                  | EFV    | DRV/rq | 2.79               | 7.35 | 10.28 | 7.35               | 10.28 | 10.41 | 10.41 | 10.14              | 13.07 | 17.63 | 20.42 | 8.63                  | 11.67 | 15.46 | 16.18 |
| EFV                  | RAL    | DRV/rb | 7.35               | 1.69 | 10.87 | 7.35               | 10.94 | 10.87 | 10.94 | 9.04               | 18.22 | 12.55 | 19.91 | 9.55                  | 16.03 | 12.76 | 19.83 |
| FTC                  | ETR    | DRV/rb | 2.79               | 6.31 | 10.87 | 6.31               | 10.87 | 10.92 | 10.92 | 9.10               | 13.66 | 17.17 | 19.96 | 6.83                  | 12.26 | 17.14 | 17.02 |
| ABCb                 | EFV    | DRV/rb | 1.91               | 7.35 | 10.87 | 7.35               | 10.87 | 10.94 | 10.94 | 9.27               | 12.78 | 18.22 | 20.13 | 8.81                  | 12.35 | 16.03 | 17.74 |
| EFV                  | ENF    | DRV/rb | 7.35               | 2.07 | 10.87 | 7.35               | 10.94 | 10.87 | 10.94 | 9.42               | 18.22 | 12.94 | 20.29 | 9.20                  | 16.03 | 10.97 | 16.10 |
| ABCq                 | EFV    | DRV/rb | 2.14               | 7.35 | 10.87 | 7.35               | 10.87 | 10.94 | 10.94 | 9.50               | 13.01 | 18.22 | 20.36 | 8.98                  | 12.53 | 16.03 | 17.92 |
| 3TCb                 | EFV    | DRV/rb | 2.30               | 7.35 | 10.87 | 7.35               | 10.87 | 10.94 | 10.94 | 9.66               | 13.17 | 18.22 | 20.52 | 8.38                  | 12.30 | 16.03 | 16.85 |
| 3TCq                 | EFV    | DRV/rb | 2.35               | 7.35 | 10.87 | 7.35               | 10.87 | 10.94 | 10.94 | 9.70               | 13.22 | 18.22 | 20.57 | 8.40                  | 12.33 | 16.03 | 16.88 |
| ddIEC                | EFV    | DRV/rb | 2.56               | 7.35 | 10.87 | 7.36               | 10.87 | 10.94 | 10.94 | 9.91               | 13.43 | 18.22 | 20.78 | 8.77                  | 12.11 | 16.03 | 16.79 |
| FTC                  | EFV    | DRV/rb | 2.79               | 7.35 | 10.87 | 7.35               | 10.87 | 10.94 | 10.94 | 10.14              | 13.66 | 18.22 | 21.01 | 8.63                  | 12.26 | 16.03 | 16.75 |

<sup>a</sup>Regimens with more than one drug from the NNRTI, PI, or InSTI classes or NRTI subclasses were excluded. In the case of drugs for which multiple dosing schedules are used, calculations were done separately for each dosing schedule (q= once daily, b= twice daily, t= thrice daily, EC= enteric coated, /r=dosing with RTV, /c=dosing with cobicistat). Some

listed regimens may have unfavorable pharmacokinetic interactions not accounted for in the present analysis. Regimens are sorted based on the midpoint of the Loewe-Bliss range of  $IIP_{ave}$  values

<sup>b</sup>The Loewe prediction for  $IIP_{ave}$  for two or three drugs was computed using the area under the curve for the  $IIP$  vs. time curves, where  $IIP = \log(1/f_u)$  and  $f_u$  is determined from the Loewe formula for two drugs (**Equation 4**) or 3 drugs (**Fig. 3b**), with  $m$  and  $IC_{50}$  values chosen to represent the shape of the dose-response curve for each drug in the clinical concentration range ( $m'$  and  $IC_{50}'$ , **Supplementary Table S1**).

<sup>c</sup>The Bliss prediction for  $IIP_{ave}$  for two or three drugs was computed using the area under the curve for the  $IIP$  vs. time curves, where  $IIP = \log(1/f_u)$  and  $f_u$  is determined from the Bliss formula for two drugs (**Equation 3**) or 3 drugs (**Fig. 3a**), with  $m$  and  $IC_{50}$  values chosen to represent the shape of the dose-response curve for each drug in the clinical concentration range ( $m'$  and  $IC_{50}'$ , **Supplementary Table S1**).

<sup>d</sup>Predictions based on the  $DI$  index were computed using mean pairwise  $DI$  index values (**Supplementary Table S5**) for two drug combinations. For three drug combinations, we used a weighted average of pairwise  $DI$  values as described in **Supplemental Information, Methods**.

**Supplementary Table S7.** Relationship between experimental values of  $IIP_{1+2+3}$  and values predicted by three different methods for representative three drug regimens.

| Regimen <sup>a</sup> |                  |                  | Expected mode of interaction <sup>b</sup> |           |           | $IIP_{1+2+3}$ values <sup>c</sup> |       |       |          |
|----------------------|------------------|------------------|-------------------------------------------|-----------|-----------|-----------------------------------|-------|-------|----------|
| Drug 1               | Drug 2           | Drug 3           | Drugs 1+2                                 | Drugs 1+3 | Drugs 2+3 | Exper.                            | Bliss | Loewe | DI Index |
| TDF                  | FTC              | EFV              | inter                                     | inter     | inter     | 2.63                              | 4.30  | 1.88  | 2.67     |
| TDF                  | FTC              | RAL              | inter                                     | synergy   | Bliss     | 2.70                              | 4.46  | 1.91  | 3.47     |
| ABC                  | 3TC              | EFV              | Loewe                                     | inter     | inter     | 1.95                              | 3.73  | 1.78  | 2.04     |
| ABC                  | 3TC              | NVP              | Loewe                                     | inter     | inter     | 1.87                              | 3.65  | 1.73  | 2.12     |
| ETR <sup>d</sup>     | NVP <sup>d</sup> | EFV <sup>d</sup> | Loewe                                     | Loewe     | Loewe     | 1.71                              | 2.80  | 2.09  | 1.76     |
| NVP <sup>d</sup>     | ENF <sup>d</sup> | RAL <sup>d</sup> | Bliss                                     | Bliss     | Bliss     | 3.10                              | 3.38  | 1.50  | 3.40     |
| FTC                  | EFV              | RAL              | inter                                     | Bliss     | synergy   | 2.71                              | 4.22  | 1.98  | 2.93     |
| TDF                  | EFV              | RAL              | inter                                     | Bliss     | synergy   | 3.18                              | 4.28  | 1.91  | 3.33     |
| 3TC                  | EFV              | NVP              | inter                                     | inter     | Loewe     | 2.06                              | 3.75  | 1.88  | 2.16     |
| ABC                  | EFV              | NVP              | inter                                     | inter     | Loewe     | 1.91                              | 3.69  | 1.78  | 2.20     |

<sup>a</sup>Regimens were chosen to include common used combinations as well as combinations that reflect particular modes of interaction. Some combinations, such as the ETR/NVP/EFV combination chosen to reflect Loewe additivity, would not be used clinically.

<sup>b</sup>Mode of interaction (synergy, Bliss independence, intermediate, Loewe additivity, or antagonism) based on experiments summarized in **Fig. 2f**.

<sup>c</sup> $IIP_{1+2+3}$  values here reflect inhibition at the drug ratios selected to given the highest combined effect within the dynamic range of the assay with equal contribution from each drug. Under these conditions, the differences between the Loewe and Bliss predictions are maximized. Because the drug concentrations used in these experiment are different (and generally lower than) the clinical concentrations, the  $IIP_{1+2+3}$  values in this table do not reflect  $IIP_{1+2+3}$  values at clinical drug concentrations. Estimated  $IIP_{1+2+3}$  values at clinical concentrations are shown in **Fig. 4** and **Supplementary Table S6**.

<sup>d</sup>These experiments were carried out with CCR5-tropic virus.

**Supplementary Table S8.** Comparison of  $IC_{50}'$  and  $m'$  values obtained using R5 and X4 viruses.

| Drug | $\log IC_{50}'^a$ |                 |                | $m'^b$          |                 |                |
|------|-------------------|-----------------|----------------|-----------------|-----------------|----------------|
|      | R5 <sup>c</sup>   | X4 <sup>d</sup> | <i>P</i> value | R5 <sup>c</sup> | X4 <sup>d</sup> | <i>P</i> value |
| AZT  | 0.43 ± 0.59       | 0.20 ± 0.69     | 0.4756         | 0.48 ± 0.17     | 0.63 ± 0.21     | 0.1770         |
| d4T  | -0.01 ± 0.35      | 0.07 ± 0.42     | 0.6864         | 0.75 ± 0.15     | 0.85 ± 0.20     | 0.1743         |
| 3TC  | -1.29 ± 0.25      | -1.25 ± 0.23    | 0.7638         | 1.23 ± 0.30     | 1.12 ± 0.25     | 0.5241         |
| FTC  | -1.34 ± 0.52      | -1.56 ± 0.47    | 0.5424         | 1.19 ± 0.19     | 1.26 ± 0.44     | 0.6229         |
| TDF  | -0.99 ± 1.02      | -1.91 ± 0.63    | 0.2581         | 0.50 ± 0.14     | 0.41 ± 0.13     | 0.3853         |
| ABC  | -0.69 ± 0.38      | -1.14 ± 0.66    | 0.1578         | 1.20 ± 0.22     | 1.04 ± 0.23     | 0.3423         |
| NVP  | -0.58 ± 0.18      | -0.65 ± 0.22    | 0.5703         | 2.06 ± 0.29     | 2.40 ± 0.64     | 0.1624         |
| EFV  | -1.77 ± 0.13      | -1.84 ± 0.18    | 0.4521         | 2.30 ± 0.26     | 2.57 ± 0.51     | 0.2082         |
| RAL  | -1.36 ± 0.07      | -1.38 ± 0.31    | 0.7833         | 0.91 ± 0.08     | 0.91 ± 0.15     | 0.9207         |
| ELV  | -1.28 ± 0.17      | -1.22 ± 0.33    | 0.5941         | 0.88 ± 0.22     | 0.87 ± 0.27     | 0.9202         |

<sup>a</sup> $IC_{50}'$  is determined from  $m'$  and the y-intercept of a linear regression line best representing the dose-response curve in the clinical concentration range as described in Methods.

<sup>b</sup>  $m'$  is the slope of a linear regression line best representing the dose-response curve in the clinical concentration range (see Methods).

<sup>c</sup>Data from infectivity assays carried out with recombinant HIV-1 vector (pNL43-ΔE-EGFP) pseudotyped with an R5 envelope (SF162).

<sup>d</sup>Data from infectivity assays carried out with recombinant HIV-1 vector pseudotypes with an X4 envelope (HXB2).

## Supplementary Material

### Methods

**Antiretroviral drugs.** Drugs were obtained through the NIH AIDS Research and Reference Reagent Program, Division of AIDS at the National Institute of Allergy and Infectious Diseases, US National Institutes of Health, except for EVG which was provided by D. Hazuda (Merck). 3TC, AZT, ABC, ddI, EFV, NVP, ETR, EVG, ATV DRV, LPV, NFV, RTV, and MVC were dissolved in DMSO. d4T, FTC, TDF, and RAL were dissolved in tissue culture media (DMEM + 50% human serum + 10% fetal calf serum). ENF was reconstituted in a 0.1 M sodium bicarbonate buffer solution, pH 8.6. Stock solutions were at 50 mM except for TDF (40 mM), RAL (10 mM), and ENF (1 mM). Stocks were aliquoted and stored at -20°C except for ENF which was stored at -80°C. Concentrations of the DMSO vehicle were constant for all drug dilutions.

**Virus stocks.** HEK 293 T cells were propagated in DMEM with 10% fetal bovine serum in tissue culture flasks to 90% confluence. Cells were transfected with a previously described<sup>1,2</sup> HIV-1 vector (pNL43- $\Delta$ E-EGFP) containing a GFP-tagged, defective envelope. The envelope was provided in trans by co-transfection with a CXCR4 envelope expression vector except that in the case of experiments involving MVC, a CCR5 envelope expression vector was used. Transfections were done using Lipofectamine 2000 following the manufacturer's instructions (Invitrogen). After 7-8 hours, medium was replaced with RPMI1640 supplemented with 10% fetal bovine serum (FBS). After incubation for 48 hours, supernatants were collected and centrifuged at 1200 rpm for 10 minutes to pellet cellular debris. Supernatants were then filtered through a 0.22  $\mu$ m membrane. Virus was pelleted by ultracentrifugation at 100,000 g for 2 hours. The viral pellets were resuspended in RPMI1640, aliquoted to appropriate volume, and stored at -80 °C. Viral stocks were standardized based on level of HIV-1 p24 determined using an enzyme-linked immunosorbent assay (Perkin-Elmer). For each virus preparation, titrations were done to determine the amount of virus needed to give 20% infection of  $1 \times 10^5$  cells. For experiments containing PIs, the medium was replaced 7-8 h after transfection with RPMI1640 containing the PIs and



50% human serum plus 10% FBS. The transfected cells were incubated for 48 hours, and the virus was collected and used for infection without concentration at concentrations giving ~20% infection.

**Infectivity assays.** Inhibition of HIV-1 infection was measured in a single round infectivity assay as previously described<sup>1,2</sup>. To accurately mimic infection events *in vivo*, infections were carried out in primary CD4<sup>+</sup> T lymphoblasts. To account for individual variation in cellular uptake and metabolism of drugs, assays were carried out in lymphoblasts from 10-60 donors, and average levels of inhibition were computed. High serum concentrations were used to account for protein binding. For protein bound drugs, titrations of drug effect vs. serum concentration demonstrated that inclusion of 50% human serum and 10% fetal calf serum provided a close approximation for *in vivo* drug binding. Lots of human serum were preselected for low toxicity to CD4<sup>+</sup> T lymphoblasts. Drugs were added to lymphoblast targets, and cells were incubated at 37°C for 16 hours before infection to allow sufficient time for triphosphorylation of NRTIs. Longer preincubations did not enhance antiviral activity. PIs were also added at the stage of viral production in 293T cells<sup>2</sup>. After spin infection in 96 well plates, targets incubated for 3 days at 37 °C. Cells were then fixed in 2% formaldehyde, and GFP expression was analyzed by flow cytometry. After gating for viable cells, the fraction of infection events unaffected by drug ( $f_u$ ) was determined as the % GFP<sup>+</sup> cells in the presence of drug divided by the % GFP<sup>+</sup> cells in control wells set up without drug.

**Calculation of  $IIP_{ave}$  for single drugs.** For single drugs,  $IIP_{ave}$  was computed from the area under the curve (AUC) of the  $IIP$  vs. time curve over a dosing interval ( $\tau$ ):

$$IIP_{ave} = \frac{AUC [IIP(t)]}{\tau}$$

$IIP$  at a given time ( $t$ ) was computed using the median-effect equation for  $f_u$  (Equation 1):

$$IIP(t) = \log [1/f_u(t)] = \log [1+(D(t)/IC_{50}')^{m'}]$$

where  $m'$  and  $IC_{50}'$  represent values that best approximate the shape of the dose-response curve in the clinical concentration range (**Supplementary Table S1**). In cases where clinical concentrations

produced levels of inhibition within the dynamic range of the assay ( $IIP < 3$ ),  $m'$  and  $IC_{50}'$  were directly determined from the experimental data.  $m'$  was taken as the slope of a linear regression line through these data points on a median-effect plot, and  $IC_{50}'$  was calculated as:

$$IC_{50}' = 10^{-b/m'}$$

where  $b$  is the y-intercept of the regression line. In cases where clinical concentrations produce levels of inhibition beyond the dynamic range of the assay ( $IIP > 3$  at  $C_{\min}$ ),  $m'$  was taken to be the slope of a linear regression line through the three data points closest to the clinical concentration range (**Supplementary Figure S7**).  $IC_{50}'$  was determined as above. For drugs with sharply inflected dose-response curves,  $m'$  and  $IC_{50}'$  are expected to differ from previously reported values<sup>1</sup> which were based on minimal estimates of  $m$ . Values for  $m'$  and  $IC_{50}'$  for each donor were used to compute  $IIP(t)$ . To estimate  $D$  as a function of time  $t$ , we assumed exponential decay from  $C_{\max}$  and rapid absorption and distribution of the drug. We used published values for  $C_{\max}$  and  $t_{1/2}$  (see **Supplementary Table S3**). For NRTIs, half-lives of the active intracellular triphosphate forms were used. The mean and SD of  $IIP_{\text{ave}}$  values for each drug are shown in **Fig. 1g** and **Supplementary Table S3**. Note that this analysis assumes that upwardly infecting curves for NNRTIs and PIs do not undergo an additional downward inflection at high  $D$ . Support for this assumption comes from a theoretical analysis of the molecular basis for upwardly infecting dose-response curves (see **Supplementary Note 2** and reference 3). Importantly, this calculation takes into account both the complex shapes of the dose-response curves revealed here and pharmacokinetic differences between drugs. Although individual variability in pharmacodynamic parameters gives rise to variability in  $IIP_{\text{ave}}$  (**Fig. 1g**), the differences in  $IIP_{\text{ave}}$  values for different drugs are highly significant for most comparisons (**Supplementary Table S4**). This analysis does not consider individual variation in pharmacokinetics, which is likely to provide additional variation. Nevertheless, the striking multilog differences in  $IIP_{\text{ave}}$  provide insight into the general activity of these drugs in populations of patients.

**Combination experiments.** To determine whether the combined effect of two antiretroviral drugs followed the predictions of the Bliss or Loewe models, we tested pairs of drugs at constant molar ratios chosen to maximize the difference between the levels of inhibition predicted by the two models. Drug

combinations are often evaluated in surface experiments in which all possible combinations of several different concentrations of each drug are tested<sup>4,5</sup>. However, the difference between the inhibition predicted by the two models increases with drug concentration (**Fig. 2b**) and is maximal when both drugs contribute equally to the observed suppression (R. Siliciano, unpublished observation). Therefore, we chose drug concentrations such that at the highest concentrations used, the total inhibition predicted by the Bliss model would be within the dynamic range of the assay ( $IIP < 3$ ), with each drug contributing equally. Drugs were mixed at these concentrations and serially diluted. Experimental analysis was carried out in cells from 5-15 donors/combination.

Two drug interactions were characterized with respect to model predictions using two methods. For both methods, predicted dose-response curves were constructed using **Equations 3** and **4**. Because the dose-response curves for some drugs showed pronounced inflections in the measured concentration range, we used local average  $m$  and  $IC_{50}$  values computed with three data points centered on the point of interest. To determine whether experimental results from combination experiments fit predictions of the Bliss or Loewe models,  $R^2$  values were computed for the fit with experimental data. A combination was considered to fit the Bliss or Loewe prediction if the relevant  $R^2$  value was  $> 0.9$ . An intermediate pattern was defined as inhibition between the predictions of the Loewe and Bliss models, with  $R^2 < 0.9$  for both models and  $F_L < F_E < F_B$ , where  $F_L$ ,  $F_E$ , and  $F_B$  are logarithmic measures of inhibition,  $\log [(1-f_u)/f_u]$ , for the Loewe prediction, the experimental data, and the Bliss prediction, respectively. An intermediate pattern was also assigned in cases where  $F_L < F_E < F_B$  and  $R^2 > 0.9$  for both models. Synergy was defined as  $R^2 < 0.9$  for Bliss and  $F_E > F_B > F_L$ . Antagonism, defined as  $R^2 < 0.9$  for Loewe and  $F_E < F_L < F_B$ , was not observed.

In a second approach to characterizing drug combinations, a  $DI$  index was computed using Equation 5. Because the difference between the Bliss and Loewe predictions increases with drug concentration, the  $DI$  index was computed using the highest concentration in the measurable range. In general, differences between the  $DI$  index at this concentration and at the next lowest concentration were not significant, suggesting that the index reflects the degree to which the drugs behave independently, a

feature that should remain constant over a wide range of drug concentrations. This analysis assumes that  $F_B > F_L$ , which is true over a wide range of  $m$  and  $IC_{50}$  values and can be formally proven for  $m_1 = m_2 = 1$ .

**Calculation of  $IIP_{ave}$  for drug combinations.** For three drug combinations,  $IIP_{ave_{1+2+3}}$  values were computed from the area under the curve of the  $IIP_{1+2+3}$  vs. time plot over a 24 hr period. Drug levels achieved with standard dosing for each drug and published plasma and intracellular (for NRTIs) half-lives were used to calculate  $IIP_{ave_{1+2+3}}$  for each model. Formulas for the three drug forms of the Bliss and Loewe models are given in **Fig. 3a**. The  $m$  and  $IC_{50}$  values for each component drug were chosen to best represent the shapes of the single drug dose-response curves in the clinical concentration range ( $m'$  and  $IC_{50}'$ , **Supplementary Table S1**). We assumed that three drugs were taken simultaneously at the beginning of this period, reached  $C_{max}$  quickly, and then decayed exponentially as described above. For *bid* and *tid* drugs, the effects of the additional doses were included after the appropriate interval. For a given time  $t$ , the concentrations of drugs 1, 2, and 3 were used to compute  $IIP_{ave_{1+2+3}}$  using three drug forms of the Bliss and Loewe equations. In each case,  $IIP_{ave_{1+2+3}} = \log(1/f_{u_{1+2+3}})$  where  $f_{u_{1+2+3}}$  is given by the relevant formulas (**Fig. 3a**). The Loewe formula is based on the idea the inhibitors act in a mutually exclusive way or compete for the same binding site as discussed by Chou<sup>5</sup>. It is derived from the general expression for an  $n$  drug combination with no synergy or antagonism:

$$1 = \sum_{i=1}^n \frac{D_i}{(D_x)_i}$$

where  $D_i$  is the concentration of drug  $i$  in a combination giving  $x$  % inhibition and  $(D_x)_i$  is the concentration of drug  $i$  alone that produces the same degree of inhibition. Using the convention of positive slopes for inhibitory drugs, Equation 1 for any given value of  $f_u$  can be written as:

$$(D_x)_i = IC_{50} \left( \frac{f_u}{1 - f_u} \right)^{-1/m}$$

This substitution can be used for each drug to obtain the Loewe three drug expression given in **Fig. 3a**.

To obtain a more precise estimate of  $IIP_{ave}$  for three drug combinations, we used experimentally determined  $DI$  values (**Supplementary Table S5**) to map inhibition at clinical concentrations in relation to the predictions of the Bliss and Loewe estimates calculated from the above formulas. A weighted average of the three relevant pairwise  $DI$  values was used. Weighting was based on the predicted degree of inhibition produced by each pair and was allowed to vary with time as drug concentrations changed. The following formula was used:

$$F_{\text{predicted}_{1+2+3}} = F_{L_{1+2+3}} + [DI_{1+2+3} \times (F_{B_{1+2+3}} - F_{L_{1+2+3}})]$$

where  $DI_{1+2+3} = [(DI_{1+2} \times F_{1+2}) + (DI_{1+3} \times F_{1+3}) + (DI_{2+3} \times F_{2+3})] / (F_{1+2} + F_{1+3} + F_{2+3})$ . Note that at higher levels of inhibition,  $F$  approaches  $\log(1/f_u)$ , which is the  $IIP$ . The precise relationship is:

$$IIP = \log(1/f_u) = \log(1 + 10^F)$$

## References

1. Shen, L. *et al.* Dose-response curve slope sets class-specific limits on inhibitory potential of anti-HIV drugs. *Nat. Med.* 14, 762-766 (2008).
2. Sampah, M. E., Shen, L., Jilek, B. L. & Siliciano, R. F. Dose-response curve slope is a missing dimension in the analysis of HIV-1 drug resistance. *Proc. Natl. Acad. Sci. U. S. A.* 108, 7613-7618 (2011).
3. Shen, L. *et al.* A critical subset model provides a conceptual basis for the high antiviral activity of major HIV drugs. *Sci. Transl. Med.* 3, 91ra63 (2011).

4. Greco, W. R., Bravo, G. & Parsons, J. C. The search for synergy: a critical review from a response surface perspective. *Pharmacol. Rev.* 47, 331-385 (1995).

5. Chou, T. C. Theoretical basis, experimental design, and computerized simulation of synergism and antagonism in drug combination studies. *Pharmacol. Rev.* 58, 621-681 (2006).

**Supplementary Note 1. Non-linearity of median-effect plots for certain antiretroviral drugs.** For every donor tested (n=35), median-effect plots of the dose-response curves for the PI ATV showed a striking upward inflection (**Fig. 1c**). The tangent slopes below the  $IC_{50}$  ( $m^*$ ) were much lower than the tangent slopes in the region of the dose-response curve closest to the clinical concentration range ( $m'$ ).  $m^*$  was calculated from the slope of a best fit line through the data points for which  $\log [(1-f_u)/f_u] < 0$ .  $m'$  was taken to be the slope of a linear regression line through the three data points closest to the clinical concentration range. The difference was highly significant ( $m^* = 0.98 \pm 0.50$ ,  $m' = 3.52 \pm 0.41$ ,  $P < 0.0001$ ). The same was true for all other PIs studied (**Supplementary Fig. S1**). For every donor, median-effect curves for each PI inflected sharply upward above the  $IC_{50}$ , with  $m'$  significantly greater than  $m^*$  (**Supplementary Table S1**).

**Supplementary Note 2. Extrapolating median-effect plots to high  $D$ .** In cases where the inhibition produced by clinical concentrations of a drug is high ( $IIP > 3$ ) and beyond the dynamic range of the infectivity assay, extrapolation of the median-effect plot from the upper end of the measurable concentration range was used to estimate inhibition at clinical concentrations. This approach assumes that these transformed dose-response curves do not show a saturation effect or downward inflection at high  $D$ . This assumption is supported by several lines of evidence:

1) We have recently described a new model for drug action that explains the upward inflections observed for PIs and NNRTIs<sup>1</sup>. For these drugs, multiple copies of the drug target are involved in the relevant step in the virus life cycle. For example, multiple copies of protease simultaneously participate in virus maturation. If a certain critical number ( $c$ ) of these enzyme molecules out of a total of  $n_T$  protease enzyme molecules per virion must be in an unbound state for virus maturation to be completed, then it is possible to derive from the law of mass action the following expression for  $f_a$ , the fraction of infection events blocked by drug, as a function of,  $c$ ,  $n_T$ , the drug concentration  $D$ , the unbound virus concentration  $V$ , and  $K_d$ , dissociation constant for the drug-target binding:

$$f_a(n_T) = \frac{\sum_{i=n_T-c+1}^{n_T} \binom{n_T}{i} \left(\frac{D}{K_d}\right)^i}{\sum_{i=0}^{n_T} \binom{n_T}{i} \left(\frac{D}{K_d}\right)^i}$$

This equation simply states that  $f_a$  is the sum of all viruses having subthreshold numbers of unbound enzymes divided by the total number of viruses. We have shown that for values of  $c$  and  $n_T$  that fit the NNRTI and PI dose response curves, the logarithmic measures of inhibition based on this function do not show saturation or downward inflection as  $D$  increases above the  $IC_{50}$ , even at very high  $D$  (**Fig. S2a and S2b**). The NNRTI curves show a slight upward inflection (**Fig. S2a**). The pronounced upward inflection in the experimental PI dose response curves (**Fig. 1c-f**) is further explained in point 2. Importantly, in no case do the curves inflect downward at concentrations above substantially above the  $IC_{50}$ .



2) We have recently shown that the sharp upward inflection in the PI dose response curves (**Fig. 1c-f**) results from the fact that the inhibition of virus maturation affects multiple downstream steps in the virus life cycle (Rabi et al, manuscript in preparation). In this sense, individual PIs behave as drug combinations. As shown here, when different steps in the life cycle are targeted, the combined effects follow Bliss independence (**Fig. 2a and b**). In this situation, the logarithmic measures of inhibition inflect upward.

3) Downward inflections are not apparent when infectivity assays are done with an extended 6 log dynamic range allowing<sup>2</sup>.

## References

1. Shen, L. *et al.* A critical subset model provides a conceptual basis for the high antiviral activity of major HIV drugs. *Sci. Transl. Med.* 3, 91ra63 (2011).
2. Shen, L. *et al.* Dose-response curve slope sets class-specific limits on inhibitory potential of anti-HIV drugs. *Nat. Med.* 14, 762-766 (2008).

### **Supplementary Note 3. Complex shapes of dose-response curves for antiretroviral drugs.**

As shown in **Fig. 1e**, PIs and NNRTIs have steep, upwardly inflected dose-response curves. Complex curves were also noted for other antiretrovirals. The fusion inhibitor enfuvirtide (ENF) has a steep, slightly inflected dose-response curve ( $m = 1.53 \pm 0.24$ ). Complex dose-response curves were also observed for the deoxyadenosine analogs didanosine (ddI) and tenofovir disoproxil fumarate (TDF), the deoxyguanosine analogue abacavir (ABC), and the deoxythymidine analogue stavudine (d4T). The other deoxythymidine analogue, zidovudine (AZT), has a very low slope ( $m = 0.62 \pm 0.21$ ). The atypical nature of these curves may reflect complexities in conversion from prodrugs to active triphosphate forms as well as the excision reaction that reverses inhibition. Standard, non-cooperative dose-response curves (linear median effect plot with  $m \approx 1$ ) were observed only for two deoxycytidine analogs, lamivudine (3TC) and emtricitabine (FTC), and for InSTIs. The CCR5 antagonist maraviroc (MVC), the only drug targeting a host protein, had a linear curve with a low slope ( $m = 0.61 \pm 0.17$ ).
